# Supplementary material for: Natural selection and repeated patterns of molecular evolution following allopatric divergence
Source: eLife journal article supplement (doi:10.7554/elife.45199), 2019-08-02
Supplement: supp [file elife_poa_e45199_Supplementary_file_4.xlsx]

## Sheet: Sheet1
Table S3. Iinformation of divergence time estimated from BEAST using 7 SCG genes shared by all 40 taxa on a global phylogeny, Ks value in peak frequency, and relative abundance of POGs in three Ka/Ks ratio ranges used in correlation analyses shown in Figures 5 and 6.
Genera	Divergence time (mya)	95%CI	Ks in peak	SE of Ks in peak	95% CI of Ks in peak	0<= Ka/Ks<0.1	0.1<= Ka/Ks< 0.5	Ka/Ks>=1.1
Acorus	8.5457	4.56,13.6174	0.0548507	0.018	0.0548, 0.0551	0.224549	0.625706	0.037333
Calycanthus	4.6742	2.3453,7.5002	0.0245375	0.012	0.0249 ,0.0251	0.196377	0.559387	0.0543434
Campsis	3.0412	1.5107,5.0931	0.00259183	0.002	0.0029, 0.0031	0.29379	0.510349	0.0461837
Convallaria	3.1878	1.5101,5.3221	0.0014618	0.001	0.0009, 0.0011	0.362741	0.412498	0.0683996
Cornus-1	10.6664	5.2474,17.2011	0.0348288	0.015	0.0349, 0.0351	0.235543	0.572047	0.044547
Cornus-2	3.2374	1.4009,5.5711	0.014701	0.009	0.0149, 0.0151	0.307021	0.493724	0.0511865
Cotinus	1.893	0.9342,3.4056	0.00359233	0.003	0.0039, 0.0041	0.32797	0.467972	0.0560608
Croomia	8.968	4.6673,14.2336	0.0350221	0.014	0.0348, 0.0352	0.22453	0.568977	0.0541102
Dysosma	2.5943	1.2789,4.3704	0.0145686	0.008	0.0149, 0.0151	0.262097	0.513908	0.0532172
Gelsemium	8.9985	5.2317,14.6065	0.0548365	0.017	0.0549, 0.0551	0.115658	0.683812	0.0310694
Hamamelis	5.5288	2.9722,9.0186	0.0349581	0.014	0.0349, 0.0351	0.156931	0.614903	0.0472335
Liquidarnbar	3.6581	1.8937,6.0794	0.0251309	0.012	0.0249, 0.0251	0.223345	0.580289	0.0436677
Liriodendron	1.6912	0.783,3.0547	0.00278611	0.002	0.0029, 0.0031	0.353525	0.464092	0.0484063
Meehania	4.4223	2.2457,7.247	0.025015	0.012	0.0249, 0.0251	0.263523	0.581135	0.0329514
Menispermum	5.089	2.5619,8.3809	0.00104471	0.001	0.0009, 0.0011	0.336733	0.454783	0.0551064
Nelumbo	3.3116	1.5043,5.7049	0.0147586	0.009	0.0149, 0.0151	0.182077	0.49907	0.0875369
Penthorum	2.8522	1.369,4.771	0.0152364	0.009	0.0151, 0.0153	0.282985	0.530159	0.0437131
Phryma	3.5623	1.8113,5.8008	0.0246935	0.011	0.0249, 0.0251	0.283347	0.526798	0.0474868
Sassafras	3.6748	1.7921,6.0333	0.0152637	0.009	0.0151, 0.0154	0.270875	0.514147	0.0614365
Saururus	8.5509	4.8261,13.2997	0.0348347	0.014	0.0349, 0.0351	0.229307	0.594727	0.0430411
