# Supplementary material for: Natural selection and repeated patterns of molecular evolution following allopatric divergence
Source: eLife. 2019 Aug 2;8:e45199. doi: 10.7554/eLife.45199 (PMC6744222; doi:10.7554/eLife.45199)
Supplement: Supplementary file 1. [file elife-45199-supp1.xlsx]

## Sheet: Sheet1
	Total gene families(TGF)	# of putative single copy POG pairs	POG/TGF
Acorus	13768	8596	0.624346
Calycanthus	17552	11558	0.6585
Campsis	19986	10420	0.521365
Convallaria	25215	15161	0.601269
Cornus-1	19798	12199	0.616173
Cornus-2	19457	13245	0.680732
Cotinus	19908	13247	0.665411
Croomia	21192	11580	0.546433
Dysosma	17890	12135	0.678312
Gelsemium	17057	11387	0.667585
Hamamelis	17707	11526	0.650929
Liquidambar	19344	12422	0.642163
Liriodendron	19793	11530	0.582529
Meehania	19254	12811	0.665368
Menispermum	25299	13745	0.543302
Nelumbo	17962	11994	0.667743
Penthorum	17051	11644	0.682892
Phryma	20973	12548	0.598293
Sassafras	18878	12535	0.664
Saururus	15403	9693	0.629293
