# Supplementary material for: Natural selection and repeated patterns of molecular evolution following allopatric divergence
Source: eLife. 2019 Aug 2;8:e45199. doi: 10.7554/eLife.45199 (PMC6744222; doi:10.7554/eLife.45199)
Supplement: Supplementary file 2. [file elife-45199-supp2.xlsx]

## Sheet: Sheet1
Saururus			Sassafras			Phryma			Penthorum			Nelumbo			Menispermum			Meehania			Liriodendron			Liquidarnbar			Hamamelis			Gelsemium			Dysosma			Croomia			Cotinus			Cornus-2			Cornus-1			Convallaria
Range of Ks value	Percent of Ks	Average value of Ks	Range of Ks value	Percent of Ks	Average value of Ks	Range of Ks value	Percent of Ks	Average value of Ks	Range of Ks value	Percent of Ks	Average value of Ks	Range of Ks value	Percent of Ks	Average value of Ks	Range of Ks value	Percent of Ks	Average value of Ks	Range of Ks value	Percent of Ks	Average value of Ks	Range of Ks value	Percent of Ks	Average value of Ks	Range of Ks value	Percent of Ks	Average value of Ks	Range of Ks value	Percent of Ks	Average value of Ks	Range of Ks value	Percent of Ks	Average value of Ks	Range of Ks value	Percent of Ks	Average value of Ks	Range of Ks value	Percent of Ks	Average value of Ks	Range of Ks value	Percent of Ks	Average value of Ks	Range of Ks value	Percent of Ks	Average value of Ks	Range of Ks value	Percent of Ks	Average value of Ks	Range of Ks value	Percent of Ks
0-0.01	0.066106	0.0022129	0-0.01	0.179892	0.00296698	0-0.01	0.125859	0.00323085	0-0.01	0.175803	0.00383592	0-0.01	0.313834	0.0035539	0-0.01	0.402314	0.00104471	0-0.01	0.0691236	0.0027183	0-0.01	0.407909	0.00278611	0-0.01	0.0778879	0.00232928	0-0.01	0.0470785	0.00206067	0-0.01	0.0189207	0.00123744	0-0.01	0.335165	0.00402013	0-0.01	0.0876945	0.00100161	0-0.01	0.41019	0.00359233	0-0.01	0.300041	0.00332718	0-0.01	0.0650697	0.00171429	0-0.01	0.547596
0.01-0.02	0.0983415	0.0157552	0.01-0.02	0.252626	0.0152637	0.01-0.02	0.217612	0.0153238	0.01-0.02	0.305024	0.0152364	0.01-0.02	0.335357	0.0147586	0.01-0.02	0.165798	0.0150263	0.01-0.02	0.124321	0.0156165	0.01-0.02	0.255487	0.0146387	0.01-0.02	0.128322	0.0156302	0.01-0.02	0.0832713	0.0157573	0.01-0.02	0.0250722	0.0159219	0.01-0.02	0.349851	0.0145686	0.01-0.02	0.0450596	0.0155404	0.01-0.02	0.297646	0.01434	0.01-0.02	0.303508	0.014701	0.01-0.02	0.0770468	0.015716	0.01-0.02	0.16917
0.02-0.03	0.185237	0.0251351	0.02-0.03	0.237444	0.0246322	0.02-0.03	0.24768	0.0246935	0.02-0.03	0.266313	0.0245854	0.02-0.03	0.190857	0.0241966	0.02-0.03	0.145511	0.0250711	0.02-0.03	0.186141	0.025015	0.02-0.03	0.143825	0.0243765	0.02-0.03	0.238751	0.0251309	0.02-0.03	0.18422	0.0253757	0.02-0.03	0.0569485	0.0255732	0.02-0.03	0.159023	0.0242188	0.02-0.03	0.086179	0.0255168	0.02-0.03	0.126169	0.0241116	0.02-0.03	0.178704	0.0244175	0.02-0.03	0.148552	0.0253617	0.02-0.03	0.0902846
0.03-0.04	0.20591	0.0348347	0.03-0.04	0.13258	0.034441	0.03-0.04	0.161684	0.0344559	0.03-0.04	0.132973	0.0342193	0.03-0.04	0.0741354	0.0341038	0.03-0.04	0.107219	0.0342366	0.03-0.04	0.181556	0.0348061	0.03-0.04	0.0714069	0.0343129	0.03-0.04	0.224893	0.0347289	0.03-0.04	0.234927	0.0349581	0.03-0.04	0.116041	0.0352762	0.03-0.04	0.0593747	0.0339439	0.03-0.04	0.135684	0.0350221	0.03-0.04	0.0533699	0.034063	0.03-0.04	0.0830376	0.0341307	0.03-0.04	0.187075	0.0348288	0.03-0.04	0.0535216
0.04-0.05	0.142607	0.0446076	0.04-0.05	0.0656722	0.0446246	0.04-0.05	0.0753436	0.0443599	0.04-0.05	0.0487783	0.0443538	0.04-0.05	0.0290655	0.0441241	0.04-0.05	0.0429363	0.04464	0.04-0.05	0.128906	0.0446544	0.04-0.05	0.0344897	0.0444522	0.04-0.05	0.129638	0.0443408	0.04-0.05	0.17901	0.0447016	0.04-0.05	0.175506	0.0451448	0.04-0.05	0.0227948	0.0443233	0.04-0.05	0.135583	0.0449073	0.04-0.05	0.0190261	0.0444165	0.04-0.05	0.0401156	0.0443325	0.04-0.05	0.15034	0.0448667	0.04-0.05	0.0259681
0.05-0.06	0.0933193	0.0546129	0.05-0.06	0.0320417	0.0543895	0.05-0.06	0.0384021	0.0546949	0.05-0.06	0.0187609	0.054038	0.05-0.06	0.0123252	0.0541903	0.05-0.06	0.0268046	0.0545936	0.05-0.06	0.0889096	0.0547448	0.05-0.06	0.0190149	0.0544686	0.05-0.06	0.0654329	0.054432	0.05-0.06	0.100763	0.0544183	0.05-0.06	0.178302	0.0548365	0.05-0.06	0.0116227	0.0541488	0.05-0.06	0.110224	0.0546802	0.05-0.06	0.0120123	0.0543919	0.05-0.06	0.0200578	0.0546366	0.05-0.06	0.112889	0.0545553	0.05-0.06	0.0160036
0.06-0.07	0.058748	0.0641913	0.06-0.07	0.0195075	0.0648584	0.06-0.07	0.0207904	0.0645054	0.06-0.07	0.00942619	0.0644194	0.06-0.07	0.00735835	0.0648163	0.06-0.07	0.0170279	0.064801	0.06-0.07	0.0585938	0.0647432	0.06-0.07	0.0114291	0.0648142	0.06-0.07	0.0334181	0.0644591	0.06-0.07	0.064291	0.0644087	0.06-0.07	0.144561	0.0647378	0.06-0.07	0.00702766	0.0640705	0.06-0.07	0.0768842	0.064453	0.06-0.07	0.0054821	0.0640309	0.06-0.07	0.010648	0.0644488	0.06-0.07	0.0739185	0.0644869	0.06-0.07	0.0119272
0.07-0.08	0.0346882	0.0746141	0.07-0.08	0.0129755	0.0751184	0.07-0.08	0.011512	0.0749037	0.07-0.08	0.00420976	0.074737	0.07-0.08	0.00432303	0.0742766	0.07-0.08	0.013606	0.0749383	0.07-0.08	0.0394871	0.0745551	0.07-0.08	0.00708	0.0745757	0.07-0.08	0.0202614	0.0744199	0.07-0.08	0.0332155	0.0742157	0.07-0.08	0.0973996	0.0745063	0.07-0.08	0.0049554	0.0743309	0.07-0.08	0.0505153	0.074787	0.07-0.08	0.00411158	0.0752412	0.07-0.08	0.00726372	0.074292	0.07-0.08	0.0395066	0.074693	0.07-0.08	0.00890768
0.08-0.09	0.023359	0.0848615	0.08-0.09	0.0074146	0.0849988	0.08-0.09	0.00790378	0.084563	0.08-0.09	0.00265398	0.083431	0.08-0.09	0.00275938	0.08448	0.08-0.09	0.00782141	0.0847167	0.08-0.09	0.0266644	0.0844427	0.08-0.09	0.00445029	0.0844545	0.08-0.09	0.0117534	0.0844127	0.08-0.09	0.0178638	0.0845005	0.08-0.09	0.0572281	0.0845765	0.08-0.09	0.00351383	0.083941	0.08-0.09	0.0340473	0.0846496	0.08-0.09	0.00282167	0.0848114	0.08-0.09	0.00511762	0.0844903	0.08-0.09	0.0291384	0.0847647	0.08-0.09	0.00551068
0.09-0.1	0.0171689	0.094785	0.09-0.1	0.00520787	0.0944729	0.09-0.1	0.00524055	0.0949656	0.09-0.1	0.00210488	0.0952652	0.09-0.1	0.00128771	0.0948286	0.09-0.1	0.00692521	0.0946035	0.09-0.1	0.0160496	0.0947254	0.09-0.1	0.00364114	0.0950611	0.09-0.1	0.0075432	0.0941465	0.09-0.1	0.0119092	0.0944555	0.09-0.1	0.038587	0.0946749	0.09-0.1	0.00396432	0.0945545	0.09-0.1	0.0267731	0.0949875	0.09-0.1	0.00314415	0.0952641	0.09-0.1	0.00363186	0.0941477	0.09-0.1	0.0178763	0.094286	0.09-0.1	0.00520873
0.1-0.11	0.0100444	0.104478	0.1-0.11	0.00414865	0.1039	0.1-0.11	0.00274914	0.104653	0.1-0.11	0.00128123	0.104971	0.1-0.11	0.000735835	0.104987	0.1-0.11	0.0072511	0.104938	0.1-0.11	0.0129076	0.104795	0.1-0.11	0.002124	0.105243	0.1-0.11	0.00561354	0.104933	0.1-0.11	0.00651284	0.104726	0.1-0.11	0.0228353	0.104322	0.1-0.11	0.00207226	0.105452	0.1-0.11	0.0246514	0.104658	0.1-0.11	0.00161238	0.10503	0.1-0.11	0.00255881	0.104055	0.1-0.11	0.0117984	0.104498	0.1-0.11	0.00445384
0.11-0.12	0.00794207	0.115378	0.11-0.12	0.00300115	0.114632	0.11-0.12	0.00300687	0.11492	0.11-0.12	0.000732131	0.11445	0.11-0.12	0.00156365	0.114624	0.11-0.12	0.00439954	0.114943	0.11-0.12	0.00738791	0.114638	0.11-0.12	0.00262972	0.115235	0.11-0.12	0.004561	0.1154	0.11-0.12	0.00446595	0.114969	0.11-0.12	0.0148196	0.114715	0.11-0.12	0.00162177	0.116206	0.11-0.12	0.0137401	0.115125	0.11-0.12	0.00096743	0.115542	0.11-0.12	0.0021461	0.114769	0.11-0.12	0.0102789	0.114044	0.11-0.12	0.00332151
0.12-0.13	0.00548937	0.124332	0.12-0.13	0.00273634	0.124706	0.12-0.13	0.00292096	0.125062	0.12-0.13	0.00137275	0.124573	0.12-0.13	0.00128771	0.123929	0.12-0.13	0.00293303	0.124453	0.12-0.13	0.00611413	0.125229	0.12-0.13	0.00111257	0.1234	0.12-0.13	0.00271906	0.12559	0.12-0.13	0.00307034	0.124609	0.12-0.13	0.00987977	0.124686	0.12-0.13	0.00180196	0.12501	0.12-0.13	0.0115175	0.124646	0.12-0.13	0.00112867	0.125421	0.12-0.13	0.00173339	0.124476	0.12-0.13	0.00563103	0.124617	0.12-0.13	0.00294406
0.13-0.14	0.00525578	0.135458	0.13-0.14	0.000794421	0.135078	0.13-0.14	0.00249141	0.135055	0.13-0.14	0.000549099	0.13345	0.13-0.14	0.000367918	0.1356	0.13-0.14	0.00342187	0.134083	0.13-0.14	0.00356658	0.134952	0.13-0.14	0.00202286	0.135365	0.13-0.14	0.00289448	0.134564	0.13-0.14	0.00241905	0.135554	0.13-0.14	0.00559232	0.134782	0.13-0.14	0.00108118	0.135708	0.13-0.14	0.0101031	0.13483	0.13-0.14	0.00096743	0.133592	0.13-0.14	0.0015683	0.135605	0.13-0.14	0.0048266	0.13487	0.13-0.14	0.00211369
0.14-0.15	0.00303667	0.143742	0.14-0.15	0.00194192	0.145723	0.14-0.15	0.0016323	0.144979	0.14-0.15	0.000366066	0.14515	0.14-0.15	0.000735835	0.143088	0.14-0.15	0.00244419	0.14525	0.14-0.15	0.00297215	0.145194	0.14-0.15	0.00131486	0.143685	0.14-0.15	0.00254364	0.144445	0.14-0.15	0.00130257	0.14395	0.14-0.15	0.00382142	0.144395	0.14-0.15	0.00117128	0.145677	0.14-0.15	0.00545565	0.145074	0.14-0.15	0.000564334	0.144314	0.14-0.15	0.00148576	0.14505	0.14-0.15	0.00446907	0.14514	0.14-0.15	0.00143429
0.15-0.16	0.00210231	0.154433	0.15-0.16	0.0014123	0.155213	0.15-0.16	0.00120275	0.155329	0.15-0.16	0.000366066	0.1573	0.15-0.16	0.00101177	0.155091	0.15-0.16	0.00162946	0.155035	0.15-0.16	0.00212296	0.155432	0.15-0.16	0.00121371	0.155375	0.15-0.16	0.000789404	0.156989	0.15-0.16	0.00186081	0.15565	0.15-0.16	0.00260975	0.153911	0.15-0.16	0.00117128	0.155192	0.15-0.16	0.00666801	0.154614	0.15-0.16	0.000725572	0.154778	0.15-0.16	0.000742881	0.156833	0.15-0.16	0.0033965	0.154434	0.15-0.16	0.00188722
0.16-0.17	0.0024527	0.16479	0.16-0.17	0.00088269	0.16519	0.16-0.17	0.00180412	0.165457	0.16-0.17	0.000549099	0.164583	0.16-0.17	0.000643856	0.1678	0.16-0.17	0.0012221	0.16568	0.16-0.17	0.00263247	0.164832	0.16-0.17	0.00131486	0.166123	0.16-0.17	0.00175423	0.165235	0.16-0.17	0.00148865	0.1648	0.16-0.17	0.00279616	0.164887	0.16-0.17	0.00117128	0.163831	0.16-0.17	0.0049505	0.1648	0.16-0.17	0.000644953	0.165788	0.16-0.17	0.00107305	0.164969	0.16-0.17	0.00232392	0.164369	0.16-0.17	0.0020382
0.17-0.18	0.00186872	0.174519	0.17-0.18	0.000970959	0.1755	0.17-0.18	0.00120275	0.174643	0.17-0.18	9.15164e-05	0.1756	0.17-0.18	0.000551876	0.1749	0.17-0.18	0.00179241	0.175105	0.17-0.18	0.00186821	0.174045	0.17-0.18	0.000809143	0.174813	0.17-0.18	0.00122796	0.17505	0.17-0.18	0.000930406	0.17589	0.17-0.18	0.00139808	0.1755	0.17-0.18	0.000900982	0.17511	0.17-0.18	0.00505153	0.174994	0.17-0.18	0.000806192	0.17403	0.17-0.18	0.000907965	0.173827	0.17-0.18	0.00223454	0.174804	0.17-0.18	0.00158526
0.18-0.19	0.00186872	0.185094	0.18-0.19	0.0011475	0.186331	0.18-0.19	0.000773196	0.185367	0.18-0.19	0.000457582	0.1852	0.18-0.19	9.19794e-05	0.1881	0.18-0.19	0.00130357	0.185425	0.18-0.19	0.00186821	0.184523	0.18-0.19	0.00131486	0.185408	0.18-0.19	0.00131567	0.18512	0.18-0.19	0.000930406	0.18422	0.18-0.19	0.000932053	0.18324	0.18-0.19	0.000630687	0.184443	0.18-0.19	0.00373813	0.185354	0.18-0.19	0.000644953	0.184888	0.18-0.19	0.000165085	0.18245	0.18-0.19	0.00178763	0.184545	0.18-0.19	0.00143429
0.19-0.2	0.000934361	0.194463	0.19-0.2	0.000353076	0.1938	0.19-0.2	0.000945017	0.194155	0.19-0.2	0.000549099	0.196167	0.19-0.2	0.000459897	0.19646	0.19-0.2	0.00146651	0.194283	0.19-0.2	0.00127378	0.19466	0.19-0.2	0.000404572	0.195725	0.19-0.2	0.000877116	0.19323	0.19-0.2	0.000651284	0.194614	0.19-0.2	0.000745643	0.1963	0.19-0.2	0.000630687	0.194529	0.19-0.2	0.00404122	0.194233	0.19-0.2	0.000806192	0.19491	0.19-0.2	0.000990508	0.194383	0.19-0.2	0.00107258	0.195383	0.19-0.2	0.000528422
0.2-0.21	0.000700771	0.206183	0.2-0.21	0.000706152	0.204	0.2-0.21	0.000687285	0.203962	0.21-0.22	0.000274549	0.2178	0.2-0.21	0.000459897	0.20522	0.2-0.21	0.000896203	0.2051	0.2-0.21	0.000934103	0.2038	0.2-0.21	0.000505715	0.20312	0.2-0.21	0.000613981	0.204743	0.2-0.21	0.00102345	0.204191	0.2-0.21	0.000559232	0.206533	0.2-0.21	0.000720786	0.203825	0.2-0.21	0.00292988	0.205086	0.2-0.21	0.00112867	0.2053	0.2-0.21	0.00165085	0.20475	0.2-0.21	0.00214516	0.204929	0.2-0.21	0.00173624
0.21-0.22	0.000583976	0.21182	0.21-0.22	0.000529614	0.217083	0.21-0.22	0.000601375	0.216143	0.23-0.24	0.000274549	0.234733	0.21-0.22	0.000459897	0.21222	0.21-0.22	0.000651784	0.213688	0.21-0.22	0.000764266	0.214811	0.21-0.22	0.000606857	0.215433	0.21-0.22	0.000877116	0.21384	0.21-0.22	0.000279122	0.216667	0.21-0.22	0.000932053	0.21416	0.21-0.22	0.000450491	0.21642	0.21-0.22	0.00262679	0.215258	0.21-0.22	0.000483715	0.214383	0.21-0.22	0.000495254	0.2137	0.21-0.22	0.00125134	0.214764	0.21-0.22	0.000754888
0.22-0.23	0.00105116	0.226411	0.22-0.23	8.8269e-05	0.2279	0.22-0.23	0.000687285	0.225112	0.24-0.25	0.000183033	0.248	0.22-0.23	0.000275938	0.2259	0.22-0.23	0.000733257	0.2258	0.22-0.23	0.000509511	0.224967	0.22-0.23	0.00101143	0.22502	0.22-0.23	0.000964828	0.224255	0.22-0.23	0.000372162	0.2257	0.22-0.23	0.000466027	0.22584	0.22-0.23	0.000450491	0.22436	0.22-0.23	0.0023237	0.226	0.22-0.23	0.000241857	0.2228	0.22-0.23	0.000577796	0.225357	0.22-0.23	0.000715052	0.223013	0.22-0.23	0.000830377
0.23-0.24	0.000467181	0.2339	0.23-0.24	0.000706152	0.234875	0.23-0.24	0.00103093	0.2342	0.26-0.27	9.15164e-05	0.2691	0.23-0.24	0.000275938	0.236467	0.23-0.24	0.000977676	0.235492	0.23-0.24	0.000934103	0.236027	0.23-0.24	0.000404572	0.235625	0.23-0.24	0.000789404	0.233589	0.23-0.24	0.000372162	0.234725	0.23-0.24	0.000559232	0.233917	0.23-0.24	0.000720786	0.235487	0.23-0.24	0.0023237	0.233665	0.23-0.24	0.000483715	0.23565	0.23-0.24	0.000247627	0.2345	0.23-0.24	0.00151949	0.234712	0.23-0.24	0.00060391
0.24-0.25	0.000116795	0.2463	0.24-0.25	0.000353076	0.247225	0.24-0.25	0.000773196	0.245122	0.29-0.3	9.15164e-05	0.2961	0.24-0.25	9.19794e-05	0.2485	0.24-0.25	0.000570311	0.243686	0.24-0.25	0.000509511	0.24615	0.24-0.25	0.000404572	0.2445	0.24-0.25	0.00105254	0.244292	0.24-0.25	0.000465203	0.24744	0.24-0.25	0.000186411	0.2445	0.24-0.25	0.000360393	0.247775	0.24-0.25	0.00222267	0.245132	0.24-0.25	0.000564334	0.245557	0.24-0.25	0.000660338	0.244175	0.24-0.25	0.000983196	0.244164	0.24-0.25	0.000981354
0.25-0.26	0.00023359	0.2559	0.25-0.26	0.000617883	0.255043	0.25-0.26	0.000773196	0.256089	0.3-0.31	0.000366066	0.30425	0.25-0.26	0.000183959	0.25795	0.25-0.26	0.000162946	0.2532	0.25-0.26	0.000424592	0.2568	0.25-0.26	0.000404572	0.253825	0.25-0.26	0.000350846	0.2558	0.25-0.26	0.000186081	0.2543	0.25-0.26	0.000279616	0.254333	0.25-0.26	0.000450491	0.25324	0.25-0.26	0.00181855	0.254844	0.25-0.26	0.00096743	0.255683	0.25-0.26	0.000660338	0.255862	0.25-0.26	0.000983196	0.254918	0.25-0.26	0.00060391
0.26-0.27	0.000350385	0.266433	0.26-0.27	0.000617883	0.264829	0.26-0.27	0.000773196	0.263922	0.31-0.32	9.15164e-05	0.3177	0.26-0.27	0.000367918	0.263225	0.26-0.27	0.000488838	0.266233	0.26-0.27	0.000509511	0.265717	0.26-0.27	0.000505715	0.26528	0.26-0.27	0.000701693	0.265125	0.26-0.27	0.000465203	0.26546	0.26-0.27	0.000186411	0.26255	0.26-0.27	0.000360393	0.264075	0.26-0.27	0.000707214	0.264786	0.26-0.27	0.000483715	0.264517	0.26-0.27	0.000247627	0.265433	0.26-0.27	0.000893815	0.26607	0.26-0.27	0.00105684
0.27-0.28	0.000350385	0.2739	0.27-0.28	0.000529614	0.2726	0.27-0.28	0.000429553	0.27346	0.32-0.33	0.000274549	0.325167	0.27-0.28	0.000275938	0.2779	0.27-0.28	0.000407365	0.2748	0.27-0.28	0.000169837	0.2774	0.27-0.28	0.000202286	0.274	0.27-0.28	0.000350846	0.275675	0.27-0.28	0.000465203	0.27526	0.27-0.28	0.000186411	0.2738	0.27-0.28	0.000360393	0.273575	0.27-0.28	0.00141443	0.275536	0.27-0.28	0.000403096	0.27672	0.28-0.29	0.000247627	0.283833	0.27-0.28	0.000893815	0.2749	0.27-0.28	0.00060391
0.28-0.29	0.00023359	0.28305	0.28-0.29	0.000529614	0.284583	0.28-0.29	0.000515464	0.286283	0.35-0.36	9.15164e-05	0.3566	0.28-0.29	0.000183959	0.2878	0.28-0.29	0.000488838	0.285483	0.28-0.29	0.000169837	0.2843	0.28-0.29	0.000202286	0.2848	0.28-0.29	0.000701693	0.283875	0.28-0.29	0.000279122	0.288633	0.28-0.29	0.000186411	0.28205	0.28-0.29	0.000270295	0.282467	0.28-0.29	0.000808244	0.284737	0.28-0.29	0.000483715	0.285667	0.29-0.3	0.000495254	0.296417	0.28-0.29	0.00125134	0.283921	0.28-0.29	0.000679399
0.29-0.3	0.000350385	0.293033	0.29-0.3	0.000264807	0.2959	0.29-0.3	0.000687285	0.295675	0.36-0.37	0.000274549	0.3677	0.29-0.3	0.000275938	0.296367	0.29-0.3	0.000162946	0.294	0.29-0.3	8.49185e-05	0.2905	0.29-0.3	0.000202286	0.29465	0.29-0.3	0.000263135	0.293867	0.29-0.3	0.000558243	0.294017	0.29-0.3	9.32053e-05	0.2943	0.29-0.3	0.000270295	0.293533	0.29-0.3	0.00141443	0.295836	0.29-0.3	0.000644953	0.295712	0.3-0.31	0.000495254	0.304867	0.29-0.3	0.000268144	0.291967	0.29-0.3	0.000452933
0.3-0.31	0.000350385	0.3076	0.3-0.31	0.000176538	0.3053	0.3-0.31	0.000515464	0.305217	0.37-0.38	0.000549099	0.373233	0.3-0.31	0.000183959	0.3038	0.3-0.31	0.000244419	0.304967	0.3-0.31	0.000339674	0.30575	0.3-0.31	0.000202286	0.3079	0.3-0.31	0.000263135	0.303267	0.3-0.31	0.000372162	0.303025	0.3-0.31	0.000372821	0.304175	0.3-0.31	0.000180196	0.30345	0.3-0.31	0.00151546	0.305453	0.3-0.31	0.000322477	0.303875	0.31-0.32	0.000330169	0.3152	0.3-0.31	0.000536289	0.305717	0.3-0.31	0.000452933
0.31-0.32	0.000116795	0.3198	0.31-0.32	0.000264807	0.314333	0.31-0.32	0.000257732	0.317933	0.38-0.39	0.000274549	0.3867	0.31-0.32	0.000643856	0.314314	0.31-0.32	0.000162946	0.31685	0.31-0.32	0.000169837	0.317	0.31-0.32	0.000303429	0.311633	0.31-0.32	8.77116e-05	0.3184	0.31-0.32	0.000279122	0.314933	0.31-0.32	0.000186411	0.3159	0.31-0.32	0.000270295	0.315767	0.31-0.32	0.000808244	0.314588	0.31-0.32	8.06192e-05	0.3189	0.32-0.33	0.000412712	0.32312	0.31-0.32	0.000357526	0.3146	0.31-0.32	0.000377444
0.32-0.33	0.000467181	0.323725	0.32-0.33	8.8269e-05	0.323	0.32-0.33	0.000687285	0.324887	0.39-0.4	0.000274549	0.3961	0.32-0.33	0.000183959	0.32525	0.32-0.33	0.000244419	0.325867	0.32-0.33	0.000679348	0.325887	0.32-0.33	0.000202286	0.3254	0.32-0.33	0.00052627	0.324233	0.32-0.33	9.30406e-05	0.328	0.32-0.33	9.32053e-05	0.3252	0.32-0.33	0.000360393	0.32445	0.32-0.33	0.000909275	0.323822	0.32-0.33	0.000322477	0.324775	0.33-0.34	8.25423e-05	0.3333	0.32-0.33	0.000536289	0.324333	0.32-0.33	0.000679399
0.33-0.34	0.000350385	0.3338	0.33-0.34	0.000706152	0.335162	0.33-0.34	0.000601375	0.336614	0.4-0.41	0.000183033	0.4049	0.33-0.34	0.000643856	0.336529	0.33-0.34	0.000162946	0.33425	0.33-0.34	0.000339674	0.335275	0.34-0.35	0.000202286	0.34185	0.33-0.34	0.000263135	0.333167	0.33-0.34	0.000186081	0.33495	0.33-0.34	0.000186411	0.332	0.33-0.34	0.000180196	0.33415	0.33-0.34	0.000808244	0.335125	0.33-0.34	0.000322477	0.335775	0.34-0.35	0.000247627	0.345067	0.33-0.34	0.000536289	0.331917	0.33-0.34	0.000377444
0.34-0.35	0.00023359	0.345	0.34-0.35	0.000353076	0.34335	0.34-0.35	0.000429553	0.34382	0.41-0.42	0.000183033	0.41305	0.34-0.35	9.19794e-05	0.3455	0.35-0.36	0.000325892	0.35575	0.34-0.35	0.000594429	0.346629	0.35-0.36	0.000303429	0.3525	0.34-0.35	0.000350846	0.3453	0.34-0.35	0.000186081	0.3468	0.34-0.35	9.32053e-05	0.3402	0.34-0.35	0.000450491	0.34524	0.34-0.35	0.000909275	0.345711	0.34-0.35	0.000644953	0.3447	0.35-0.36	0.000412712	0.35602	0.34-0.35	0.00062567	0.343343	0.34-0.35	0.000528422
0.35-0.36	0.00023359	0.3552	0.35-0.36	0.000264807	0.358833	0.35-0.36	0.000171821	0.35565	0.42-0.43	0.000274549	0.4202	0.35-0.36	0.000183959	0.35695	0.36-0.37	8.1473e-05	0.3645	0.35-0.36	0.000594429	0.352671	0.36-0.37	0.000303429	0.366567	0.35-0.36	0.00052627	0.353883	0.35-0.36	0.000186081	0.35815	0.35-0.36	9.32053e-05	0.3584	0.35-0.36	0.000270295	0.356233	0.35-0.36	0.00111134	0.355109	0.35-0.36	0.000161238	0.35335	0.36-0.37	0.000247627	0.367067	0.35-0.36	0.000357526	0.354525	0.35-0.36	0.00060391
0.37-0.38	0.000116795	0.3718	0.36-0.37	0.000441345	0.36672	0.36-0.37	0.000515464	0.36465	0.43-0.44	0.000183033	0.43645	0.36-0.37	9.19794e-05	0.3688	0.37-0.38	0.000162946	0.3732	0.36-0.37	0.000424592	0.36566	0.37-0.38	0.000101143	0.3769	0.36-0.37	0.000438558	0.36494	0.36-0.37	9.30406e-05	0.3682	0.36-0.37	0.000559232	0.365683	0.36-0.37	0.000540589	0.363883	0.36-0.37	0.00151546	0.36286	0.36-0.37	0.000483715	0.366767	0.37-0.38	0.000247627	0.377767	0.36-0.37	0.00062567	0.365257	0.36-0.37	0.000301955
0.38-0.39	0.000116795	0.382	0.37-0.38	0.000176538	0.3727	0.37-0.38	0.000515464	0.375267	0.44-0.45	0.000183033	0.44785	0.37-0.38	0.000275938	0.3733	0.38-0.39	0.000244419	0.3876	0.37-0.38	0.000254755	0.376833	0.38-0.39	0.000101143	0.3842	0.37-0.38	0.000350846	0.37295	0.37-0.38	0.000372162	0.375325	0.39-0.4	0.000186411	0.3959	0.37-0.38	0.000360393	0.371475	0.37-0.38	0.00101031	0.37408	0.37-0.38	0.000806192	0.37462	0.38-0.39	0.000165085	0.38715	0.37-0.38	0.000446907	0.37406	0.37-0.38	7.54888e-05
0.39-0.4	0.000350385	0.394667	0.38-0.39	0.000264807	0.382133	0.38-0.39	0.000687285	0.384487	0.45-0.46	0.000274549	0.459267	0.38-0.39	0.000367918	0.385775	0.39-0.4	0.000325892	0.393475	0.38-0.39	0.000254755	0.3848	0.39-0.4	0.000202286	0.394	0.38-0.39	8.77116e-05	0.384	0.38-0.39	0.000186081	0.38075	0.41-0.42	9.32053e-05	0.4143	0.38-0.39	9.00982e-05	0.3866	0.38-0.39	0.000808244	0.384813	0.38-0.39	0.000322477	0.385575	0.39-0.4	0.000412712	0.39696	0.38-0.39	0.000178763	0.3826	0.38-0.39	0.000528422
0.4-0.41	0.000116795	0.403	0.39-0.4	8.8269e-05	0.3932	0.39-0.4	0.000257732	0.394933	0.46-0.47	9.15164e-05	0.4688	0.39-0.4	0.000275938	0.396167	0.4-0.41	0.000162946	0.4039	0.39-0.4	0.000169837	0.394	0.4-0.41	0.000202286	0.40535	0.39-0.4	0.000175423	0.39765	0.39-0.4	0.000186081	0.39365	0.42-0.43	0.000186411	0.42225	0.39-0.4	0.000270295	0.393533	0.39-0.4	0.000707214	0.3953	0.39-0.4	0.000161238	0.39165	0.4-0.41	0.000412712	0.40538	0.39-0.4	0.000268144	0.394133	0.39-0.4	0.000150978
0.41-0.42	0.000467181	0.414975	0.41-0.42	0.000176538	0.41695	0.4-0.41	0.000773196	0.4052	0.47-0.48	0.000183033	0.4738	0.4-0.41	0.000183959	0.40475	0.41-0.42	0.000325892	0.416425	0.4-0.41	0.000169837	0.40745	0.42-0.43	0.000404572	0.423975	0.4-0.41	0.000350846	0.404775	0.4-0.41	9.30406e-05	0.4027	0.43-0.44	9.32053e-05	0.4382	0.4-0.41	0.000360393	0.4043	0.4-0.41	0.000404122	0.4059	0.4-0.41	0.000403096	0.40348	0.41-0.42	0.000330169	0.4149	0.41-0.42	0.000268144	0.419667	0.4-0.41	0.000301955
0.42-0.43	0.00023359	0.4239	0.42-0.43	0.000264807	0.4268	0.41-0.42	0.000343643	0.415825	0.48-0.49	0.000183033	0.4897	0.41-0.42	9.19794e-05	0.4117	0.42-0.43	0.000325892	0.42505	0.42-0.43	0.000339674	0.425325	0.43-0.44	0.000101143	0.4327	0.41-0.42	0.00052627	0.414017	0.41-0.42	0.000186081	0.4139	0.44-0.45	9.32053e-05	0.4401	0.41-0.42	0.000270295	0.413	0.41-0.42	0.00101031	0.41545	0.41-0.42	8.06192e-05	0.4148	0.42-0.43	0.000330169	0.42145	0.42-0.43	0.000536289	0.426183	0.41-0.42	0.000301955
0.43-0.44	0.000116795	0.4366	0.43-0.44	8.8269e-05	0.4371	0.42-0.43	0.000515464	0.42335	0.49-0.5	9.15164e-05	0.4967	0.42-0.43	9.19794e-05	0.4277	0.43-0.44	8.1473e-05	0.4347	0.43-0.44	0.000254755	0.435433	0.44-0.45	0.000101143	0.4402	0.42-0.43	0.000701693	0.425113	0.42-0.43	0.000186081	0.42265	0.45-0.46	9.32053e-05	0.4517	0.42-0.43	0.000180196	0.4263	0.42-0.43	0.00121237	0.425158	0.42-0.43	0.000403096	0.42416	0.43-0.44	8.25423e-05	0.4326	0.43-0.44	0.000357526	0.433775	0.42-0.43	0.000150978
0.44-0.45	0.000350385	0.445267	0.44-0.45	8.8269e-05	0.4499	0.43-0.44	0.000687285	0.4347	0.5-0.51	9.15164e-05	0.5044	0.43-0.44	9.19794e-05	0.4395	0.44-0.45	8.1473e-05	0.4413	0.44-0.45	0.000339674	0.445025	0.45-0.46	0.000101143	0.4573	0.43-0.44	0.000263135	0.4362	0.43-0.44	0.000372162	0.43375	0.46-0.47	0.000279616	0.466167	0.43-0.44	0.000270295	0.433033	0.43-0.44	0.00101031	0.43527	0.43-0.44	0.000322477	0.43625	0.44-0.45	0.000495254	0.4446	0.44-0.45	0.000268144	0.446467	0.43-0.44	0.000452933
0.45-0.46	0.000350385	0.4528	0.45-0.46	0.000264807	0.453867	0.44-0.45	0.000773196	0.4436	0.51-0.52	9.15164e-05	0.5114	0.44-0.45	0.000367918	0.443275	0.45-0.46	0.000325892	0.45535	0.45-0.46	8.49185e-05	0.4595	0.47-0.48	0.000101143	0.4791	0.44-0.45	0.000350846	0.446325	0.44-0.45	0.000372162	0.444725	0.48-0.49	0.000186411	0.487	0.44-0.45	0.000270295	0.444233	0.44-0.45	0.000808244	0.4439	0.44-0.45	0.000644953	0.445437	0.45-0.46	0.000577796	0.457814	0.45-0.46	0.000446907	0.45564	0.44-0.45	0.000301955
0.46-0.47	0.000467181	0.46765	0.46-0.47	0.000353076	0.46645	0.45-0.46	0.000257732	0.4537	0.53-0.54	0.000183033	0.53465	0.45-0.46	0.000367918	0.456275	0.47-0.48	0.000407365	0.47344	0.46-0.47	0.000169837	0.46495	0.48-0.49	0.000101143	0.489	0.45-0.46	0.00052627	0.454867	0.45-0.46	9.30406e-05	0.4589	0.5-0.51	9.32053e-05	0.5063	0.45-0.46	0.000180196	0.4571	0.45-0.46	0.000404122	0.45295	0.45-0.46	0.000241857	0.4534	0.46-0.47	8.25423e-05	0.4613	0.47-0.48	0.000268144	0.4746	0.45-0.46	7.54888e-05
0.49-0.5	0.000116795	0.497	0.47-0.48	8.8269e-05	0.4719	0.46-0.47	0.000515464	0.463967	0.54-0.55	9.15164e-05	0.5416	0.46-0.47	0.000183959	0.466	0.51-0.52	8.1473e-05	0.51	0.47-0.48	8.49185e-05	0.4762	0.49-0.5	0.000606857	0.492967	0.47-0.48	0.000350846	0.4726	0.47-0.48	0.000186081	0.4777	0.51-0.52	9.32053e-05	0.5188	0.46-0.47	0.000180196	0.4627	0.46-0.47	0.00101031	0.46387	0.46-0.47	0.000241857	0.463567	0.47-0.48	8.25423e-05	0.4735	0.48-0.49	0.000715052	0.484963	0.46-0.47	0.000226466
0.52-0.53	0.000116795	0.5249	0.48-0.49	0.000529614	0.4852	0.47-0.48	8.59107e-05	0.4793	0.55-0.56	9.15164e-05	0.5599	0.47-0.48	9.19794e-05	0.4738	0.52-0.53	8.1473e-05	0.5247	0.48-0.49	8.49185e-05	0.4846	0.5-0.51	0.000303429	0.5071	0.48-0.49	0.000175423	0.48155	0.48-0.49	9.30406e-05	0.4854	0.52-0.53	0.000279616	0.525233	0.47-0.48	0.000270295	0.4774	0.47-0.48	0.000909275	0.4748	0.47-0.48	0.000564334	0.477086	0.48-0.49	8.25423e-05	0.489	0.49-0.5	0.000268144	0.493033	0.47-0.48	0.000377444
0.55-0.56	0.000116795	0.5513	0.49-0.5	0.000176538	0.4939	0.48-0.49	0.000429553	0.48484	0.56-0.57	0.000183033	0.56265	0.48-0.49	9.19794e-05	0.4833	0.53-0.54	8.1473e-05	0.5356	0.49-0.5	0.000169837	0.4927	0.51-0.52	0.000101143	0.5144	0.49-0.5	0.000350846	0.4945	0.49-0.5	9.30406e-05	0.4945	0.53-0.54	9.32053e-05	0.5389	0.48-0.49	0.000540589	0.4828	0.48-0.49	0.000909275	0.485756	0.48-0.49	0.00096743	0.486292	0.49-0.5	0.000165085	0.4937	0.5-0.51	0.00062567	0.503157	0.48-0.49	7.54888e-05
0.56-0.57	0.00023359	0.5616	0.5-0.51	8.8269e-05	0.5046	0.49-0.5	0.000687285	0.494362	0.57-0.58	0.000183033	0.57845	0.49-0.5	0.000367918	0.495175	0.54-0.55	0.000162946	0.54605	0.5-0.51	0.000254755	0.504367	0.52-0.53	0.000202286	0.52635	0.5-0.51	0.000263135	0.506667	0.51-0.52	9.30406e-05	0.513	0.54-0.55	9.32053e-05	0.5427	0.49-0.5	0.000270295	0.497567	0.49-0.5	0.000606183	0.4956	0.49-0.5	0.000403096	0.49412	0.5-0.51	8.25423e-05	0.5026	0.51-0.52	0.000178763	0.51085	0.49-0.5	0.000452933
0.57-0.58	0.000467181	0.57265	0.51-0.52	0.000353076	0.5141	0.5-0.51	0.000171821	0.504	0.58-0.59	0.000183033	0.5855	0.5-0.51	0.000183959	0.5044	0.55-0.56	0.000325892	0.55375	0.51-0.52	8.49185e-05	0.5108	0.53-0.54	0.000404572	0.53765	0.52-0.53	0.00052627	0.52745	0.52-0.53	9.30406e-05	0.5254	0.55-0.56	9.32053e-05	0.5533	0.5-0.51	0.000180196	0.5051	0.5-0.51	0.000606183	0.505533	0.5-0.51	0.000241857	0.504567	0.51-0.52	0.000247627	0.517333	0.52-0.53	0.000268144	0.522067	0.51-0.52	7.54888e-05
0.58-0.59	0.000116795	0.5808	0.52-0.53	8.8269e-05	0.5273	0.51-0.52	0.000343643	0.51395	0.59-0.6	0.000274549	0.597467	0.51-0.52	0.000183959	0.51315	0.56-0.57	0.000162946	0.56085	0.52-0.53	0.000169837	0.5261	0.54-0.55	0.000303429	0.5455	0.53-0.54	8.77116e-05	0.5398	0.53-0.54	0.000186081	0.53885	0.56-0.57	0.000186411	0.56495	0.51-0.52	9.00982e-05	0.5141	0.51-0.52	0.00121237	0.515283	0.51-0.52	0.000241857	0.5129	0.52-0.53	8.25423e-05	0.5235	0.53-0.54	0.00062567	0.535029	0.52-0.53	7.54888e-05
0.59-0.6	0.000116795	0.5923	0.53-0.54	8.8269e-05	0.5392	0.52-0.53	0.000859107	0.52321	0.6-0.61	0.000274549	0.601	0.53-0.54	9.19794e-05	0.5342	0.57-0.58	0.000162946	0.57205	0.53-0.54	0.000169837	0.5326	0.55-0.56	0.000202286	0.55625	0.54-0.55	0.000263135	0.542967	0.55-0.56	9.30406e-05	0.5589	0.57-0.58	0.000279616	0.573133	0.52-0.53	0.000180196	0.52655	0.52-0.53	0.0013134	0.525192	0.52-0.53	0.000161238	0.5217	0.53-0.54	0.000247627	0.536733	0.54-0.55	8.93815e-05	0.5442	0.53-0.54	0.000377444
0.62-0.63	0.00023359	0.62845	0.54-0.55	0.000264807	0.5439	0.53-0.54	0.000515464	0.5356	0.62-0.63	0.000183033	0.62105	0.54-0.55	9.19794e-05	0.5459	0.58-0.59	8.1473e-05	0.5863	0.54-0.55	0.000339674	0.543625	0.56-0.57	0.000101143	0.5687	0.55-0.56	0.00052627	0.554817	0.57-0.58	0.000279122	0.573633	0.58-0.59	0.000186411	0.5877	0.53-0.54	0.000180196	0.53805	0.53-0.54	0.000404122	0.5376	0.53-0.54	0.000161238	0.53495	0.54-0.55	0.000247627	0.5445	0.55-0.56	0.000357526	0.55485	0.54-0.55	0.000377444
0.63-0.64	0.000116795	0.6325	0.55-0.56	0.000176538	0.5562	0.54-0.55	0.00120275	0.546129	0.63-0.64	0.000274549	0.6332	0.55-0.56	9.19794e-05	0.5567	0.59-0.6	0.000244419	0.595333	0.55-0.56	0.000254755	0.5582	0.57-0.58	0.000101143	0.57	0.56-0.57	0.000263135	0.565533	0.58-0.59	0.000186081	0.5859	0.59-0.6	0.000372821	0.595425	0.54-0.55	9.00982e-05	0.5404	0.54-0.55	0.000909275	0.545211	0.54-0.55	8.06192e-05	0.5449	0.55-0.56	0.000330169	0.554225	0.56-0.57	0.000268144	0.5635	0.55-0.56	0.000301955
0.64-0.65	0.000116795	0.6411	0.56-0.57	0.000264807	0.5655	0.55-0.56	0.000429553	0.55526	0.65-0.66	0.000274549	0.654467	0.56-0.57	0.000275938	0.564633	0.6-0.61	8.1473e-05	0.6097	0.56-0.57	0.000169837	0.56685	0.59-0.6	0.000202286	0.59335	0.57-0.58	0.000263135	0.573733	0.59-0.6	0.000279122	0.591967	0.6-0.61	0.000186411	0.6031	0.55-0.56	0.000180196	0.55415	0.55-0.56	0.000606183	0.555267	0.55-0.56	0.000322477	0.55645	0.56-0.57	0.000247627	0.562567	0.57-0.58	0.000715052	0.575412	0.56-0.57	7.54888e-05
0.65-0.66	0.00023359	0.65525	0.57-0.58	0.000264807	0.5718	0.56-0.57	0.000687285	0.563113	0.66-0.67	0.000549099	0.666083	0.57-0.58	9.19794e-05	0.5788	0.61-0.62	8.1473e-05	0.6164	0.58-0.59	0.000169837	0.5854	0.6-0.61	0.000404572	0.607875	0.58-0.59	8.77116e-05	0.5845	0.61-0.62	9.30406e-05	0.6105	0.61-0.62	9.32053e-05	0.6199	0.56-0.57	9.00982e-05	0.5658	0.56-0.57	0.000909275	0.566922	0.56-0.57	0.000322477	0.564375	0.57-0.58	0.000165085	0.57425	0.58-0.59	0.000446907	0.58368	0.57-0.58	0.000150978
0.66-0.67	0.000116795	0.6651	0.59-0.6	0.000264807	0.593367	0.57-0.58	0.000515464	0.574117	0.68-0.69	0.000183033	0.6846	0.58-0.59	0.000183959	0.58505	0.62-0.63	0.000162946	0.62395	0.6-0.61	0.000339674	0.605075	0.61-0.62	0.000101143	0.6123	0.59-0.6	0.000263135	0.5943	0.62-0.63	0.000186081	0.62325	0.65-0.66	9.32053e-05	0.6585	0.57-0.58	0.000180196	0.57375	0.57-0.58	0.00101031	0.5745	0.57-0.58	0.000403096	0.5755	0.58-0.59	0.000247627	0.5838	0.59-0.6	0.000536289	0.595867	0.58-0.59	0.000150978
0.67-0.68	0.000116795	0.6701	0.6-0.61	0.000264807	0.605	0.58-0.59	0.000515464	0.584667	0.7-0.71	0.000274549	0.702667	0.59-0.6	0.000275938	0.592033	0.63-0.64	0.000162946	0.6394	0.61-0.62	0.000254755	0.613333	0.62-0.63	0.000101143	0.627	0.6-0.61	0.000438558	0.60658	0.63-0.64	0.000186081	0.6376	0.66-0.67	9.32053e-05	0.6657	0.58-0.59	0.000270295	0.581833	0.58-0.59	0.00101031	0.58675	0.58-0.59	0.000161238	0.5838	0.59-0.6	0.000412712	0.5962	0.6-0.61	0.000446907	0.60176	0.59-0.6	0.000150978
0.68-0.69	0.000350385	0.685033	0.61-0.62	0.000264807	0.616067	0.59-0.6	0.000601375	0.593014	0.73-0.74	9.15164e-05	0.7325	0.61-0.62	9.19794e-05	0.6152	0.64-0.65	0.000488838	0.6469	0.62-0.63	8.49185e-05	0.6211	0.64-0.65	0.000202286	0.6479	0.61-0.62	8.77116e-05	0.6157	0.64-0.65	9.30406e-05	0.6406	0.67-0.68	0.000279616	0.672567	0.59-0.6	9.00982e-05	0.5907	0.59-0.6	0.000606183	0.593967	0.59-0.6	0.000322477	0.594475	0.6-0.61	0.000577796	0.604343	0.61-0.62	0.000357526	0.612075	0.6-0.61	0.000226466
0.69-0.7	0.000116795	0.6943	0.62-0.63	0.000176538	0.62555	0.6-0.61	0.000429553	0.60446	0.74-0.75	9.15164e-05	0.7412	0.62-0.63	0.000275938	0.6247	0.65-0.66	0.000244419	0.654067	0.63-0.64	0.000254755	0.632233	0.65-0.66	0.000303429	0.6543	0.63-0.64	0.000175423	0.63125	0.65-0.66	9.30406e-05	0.6586	0.68-0.69	0.000186411	0.6837	0.6-0.61	0.000180196	0.6087	0.6-0.61	0.000505153	0.60422	0.6-0.61	0.000322477	0.605025	0.61-0.62	8.25423e-05	0.6177	0.62-0.63	8.93815e-05	0.6214	0.61-0.62	0.000226466
0.72-0.73	0.000116795	0.7263	0.63-0.64	8.8269e-05	0.6397	0.62-0.63	0.000601375	0.625314	0.75-0.76	9.15164e-05	0.7593	0.63-0.64	0.000275938	0.636933	0.67-0.68	0.000407365	0.67378	0.64-0.65	8.49185e-05	0.6429	0.66-0.67	0.000101143	0.6663	0.64-0.65	8.77116e-05	0.6449	0.67-0.68	9.30406e-05	0.6728	0.69-0.7	0.000186411	0.6937	0.61-0.62	0.000180196	0.61545	0.61-0.62	0.000606183	0.614067	0.61-0.62	0.000241857	0.616767	0.62-0.63	0.000247627	0.626633	0.63-0.64	0.000357526	0.635775	0.62-0.63	0.000150978
0.73-0.74	0.000116795	0.734	0.65-0.66	0.000176538	0.6581	0.63-0.64	0.000257732	0.633867	0.77-0.78	0.000366066	0.77725	0.64-0.65	9.19794e-05	0.6436	0.68-0.69	0.000162946	0.6864	0.65-0.66	0.000169837	0.65305	0.69-0.7	0.000202286	0.6962	0.65-0.66	0.000263135	0.657033	0.68-0.69	0.000186081	0.68195	0.7-0.71	9.32053e-05	0.7097	0.62-0.63	0.000180196	0.62725	0.62-0.63	0.00111134	0.625364	0.62-0.63	0.000644953	0.6244	0.63-0.64	8.25423e-05	0.6327	0.64-0.65	0.000178763	0.64375	0.63-0.64	0.000150978
0.74-0.75	0.00023359	0.74755	0.66-0.67	0.000441345	0.66202	0.64-0.65	0.000257732	0.645767	0.78-0.79	0.000183033	0.7825	0.65-0.66	9.19794e-05	0.6509	0.69-0.7	8.1473e-05	0.6995	0.66-0.67	0.000254755	0.6665	0.7-0.71	0.000101143	0.7022	0.67-0.68	0.000438558	0.675	0.7-0.71	0.000279122	0.703867	0.73-0.74	9.32053e-05	0.7339	0.63-0.64	0.000450491	0.63572	0.63-0.64	0.00111134	0.636882	0.63-0.64	0.000241857	0.634467	0.64-0.65	0.000330169	0.645325	0.65-0.66	8.93815e-05	0.6535	0.64-0.65	0.000301955
0.75-0.76	0.000583976	0.75694	0.68-0.69	8.8269e-05	0.6836	0.65-0.66	0.000343643	0.65435	0.79-0.8	0.000274549	0.797467	0.68-0.69	9.19794e-05	0.6802	0.7-0.71	0.000244419	0.707333	0.68-0.69	0.000169837	0.68745	0.71-0.72	0.000101143	0.715	0.68-0.69	0.000263135	0.686533	0.71-0.72	9.30406e-05	0.7115	0.74-0.75	0.000186411	0.7444	0.64-0.65	0.000180196	0.6449	0.64-0.65	0.000707214	0.6462	0.64-0.65	0.000161238	0.6441	0.65-0.66	8.25423e-05	0.6587	0.66-0.67	0.000178763	0.6642	0.65-0.66	0.000150978
0.76-0.77	0.00023359	0.76105	0.69-0.7	8.8269e-05	0.6933	0.66-0.67	0.000773196	0.665689	0.8-0.81	0.000183033	0.8025	0.69-0.7	0.000183959	0.6964	0.71-0.72	8.1473e-05	0.7125	0.69-0.7	0.000254755	0.696333	0.74-0.75	0.000101143	0.7495	0.69-0.7	0.000263135	0.696167	0.72-0.73	9.30406e-05	0.7294	0.75-0.76	9.32053e-05	0.752	0.65-0.66	0.000360393	0.657175	0.65-0.66	0.000808244	0.65445	0.65-0.66	0.000322477	0.655725	0.66-0.67	8.25423e-05	0.6649	0.67-0.68	0.000446907	0.67424	0.66-0.67	0.000301955
0.77-0.78	0.000467181	0.776375	0.7-0.71	0.000529614	0.702167	0.67-0.68	0.000429553	0.67386	0.81-0.82	0.000274549	0.8128	0.7-0.71	9.19794e-05	0.7071	0.72-0.73	0.000244419	0.727733	0.72-0.73	0.000509511	0.72515	0.75-0.76	0.000303429	0.755667	0.7-0.71	0.000175423	0.70335	0.75-0.76	9.30406e-05	0.7594	0.76-0.77	0.000186411	0.7674	0.66-0.67	9.00982e-05	0.6696	0.66-0.67	0.000505153	0.6642	0.66-0.67	0.000403096	0.66464	0.67-0.68	0.000247627	0.672667	0.68-0.69	0.000268144	0.683067	0.67-0.68	0.000150978
0.78-0.79	0.000350385	0.785733	0.71-0.72	0.000176538	0.7115	0.68-0.69	0.000429553	0.68618	0.82-0.83	9.15164e-05	0.8286	0.71-0.72	0.000275938	0.7123	0.73-0.74	0.000325892	0.735775	0.73-0.74	0.000339674	0.736825	0.76-0.77	0.000101143	0.7662	0.71-0.72	8.77116e-05	0.7149	0.78-0.79	9.30406e-05	0.7853	0.77-0.78	0.000186411	0.7753	0.67-0.68	0.000180196	0.67455	0.67-0.68	0.000808244	0.673288	0.67-0.68	0.000161238	0.676	0.69-0.7	8.25423e-05	0.6943	0.69-0.7	0.000357526	0.69465	0.68-0.69	0.000226466
0.79-0.8	0.00023359	0.7918	0.72-0.73	0.000176538	0.72825	0.69-0.7	0.000601375	0.694743	0.83-0.84	0.000183033	0.835	0.73-0.74	9.19794e-05	0.7314	0.74-0.75	0.000407365	0.74364	0.74-0.75	0.000424592	0.744	0.77-0.78	0.000202286	0.7735	0.72-0.73	0.000263135	0.721833	0.79-0.8	0.000186081	0.79325	0.78-0.79	9.32053e-05	0.7805	0.68-0.69	0.000180196	0.68545	0.68-0.69	0.000303092	0.686467	0.68-0.69	0.000322477	0.685775	0.7-0.71	8.25423e-05	0.7083	0.7-0.71	8.93815e-05	0.701	0.69-0.7	0.000377444
0.8-0.81	0.00023359	0.80675	0.73-0.74	0.000441345	0.73256	0.7-0.71	0.000257732	0.705333	0.84-0.85	9.15164e-05	0.8433	0.74-0.75	0.000367918	0.745275	0.75-0.76	8.1473e-05	0.7591	0.75-0.76	0.000339674	0.75735	0.78-0.79	0.000202286	0.78515	0.73-0.74	0.000438558	0.7348	0.8-0.81	0.000372162	0.802975	0.79-0.8	0.000279616	0.7972	0.69-0.7	0.000450491	0.69748	0.69-0.7	0.000707214	0.694686	0.7-0.71	0.000161238	0.70325	0.71-0.72	0.000165085	0.71515	0.71-0.72	0.000357526	0.712825	0.7-0.71	0.000452933
0.81-0.82	0.000467181	0.813225	0.75-0.76	8.8269e-05	0.7502	0.71-0.72	0.000515464	0.713783	0.85-0.86	0.000183033	0.85315	0.76-0.77	0.000183959	0.7643	0.76-0.77	0.000244419	0.7679	0.76-0.77	8.49185e-05	0.7679	0.79-0.8	0.000202286	0.7944	0.74-0.75	0.000175423	0.7459	0.82-0.83	0.000279122	0.826633	0.8-0.81	0.000186411	0.80655	0.7-0.71	9.00982e-05	0.7018	0.7-0.71	0.000808244	0.704512	0.71-0.72	8.06192e-05	0.7123	0.72-0.73	0.000247627	0.722333	0.72-0.73	0.000268144	0.7233	0.71-0.72	0.000301955
0.82-0.83	0.000116795	0.829	0.76-0.77	0.000176538	0.76345	0.72-0.73	0.000257732	0.7238	0.86-0.87	0.000183033	0.8628	0.77-0.78	9.19794e-05	0.7702	0.77-0.78	0.000162946	0.7702	0.77-0.78	8.49185e-05	0.7718	0.8-0.81	0.000202286	0.8069	0.75-0.76	0.000263135	0.7546	0.86-0.87	0.000186081	0.8619	0.81-0.82	0.000186411	0.8184	0.72-0.73	9.00982e-05	0.7239	0.71-0.72	0.000808244	0.71605	0.72-0.73	0.000322477	0.722775	0.73-0.74	0.000247627	0.735133	0.73-0.74	0.000178763	0.7388	0.72-0.73	7.54888e-05
0.83-0.84	0.000116795	0.8367	0.77-0.78	0.000264807	0.772367	0.73-0.74	0.000429553	0.73534	0.87-0.88	0.000274549	0.8762	0.78-0.79	9.19794e-05	0.7887	0.78-0.79	8.1473e-05	0.7845	0.78-0.79	8.49185e-05	0.78	0.81-0.82	0.000303429	0.815967	0.77-0.78	8.77116e-05	0.7758	0.87-0.88	9.30406e-05	0.8754	0.82-0.83	0.000186411	0.826	0.74-0.75	0.000270295	0.744067	0.72-0.73	0.000707214	0.723614	0.73-0.74	0.000161238	0.7342	0.74-0.75	0.000247627	0.7453	0.74-0.75	0.000178763	0.74545	0.73-0.74	7.54888e-05
0.85-0.86	0.000116795	0.8585	0.78-0.79	8.8269e-05	0.7863	0.74-0.75	0.000429553	0.74412	0.88-0.89	9.15164e-05	0.8813	0.79-0.8	0.000367918	0.7957	0.79-0.8	0.000162946	0.79595	0.79-0.8	8.49185e-05	0.7993	0.83-0.84	0.000101143	0.8378	0.78-0.79	0.000175423	0.78785	0.88-0.89	9.30406e-05	0.8852	0.83-0.84	9.32053e-05	0.8378	0.75-0.76	9.00982e-05	0.7561	0.73-0.74	0.000707214	0.734071	0.74-0.75	0.000322477	0.74555	0.75-0.76	0.000412712	0.75392	0.75-0.76	0.000357526	0.7559	0.74-0.75	0.000377444
0.86-0.87	0.00023359	0.86565	0.79-0.8	8.8269e-05	0.797	0.75-0.76	8.59107e-05	0.7506	0.89-0.9	0.000274549	0.897867	0.81-0.82	0.000275938	0.814533	0.8-0.81	8.1473e-05	0.807	0.8-0.81	8.49185e-05	0.8074	0.84-0.85	0.000101143	0.8406	0.79-0.8	0.000350846	0.79455	0.89-0.9	9.30406e-05	0.8956	0.84-0.85	9.32053e-05	0.8487	0.76-0.77	9.00982e-05	0.769	0.74-0.75	0.000909275	0.743456	0.75-0.76	0.000161238	0.7583	0.77-0.78	8.25423e-05	0.7708	0.76-0.77	0.000268144	0.763633	0.76-0.77	0.000150978
0.87-0.88	0.00023359	0.87745	0.8-0.81	8.8269e-05	0.8024	0.76-0.77	0.000343643	0.764125	0.9-0.91	0.000274549	0.905533	0.83-0.84	0.000275938	0.835533	0.81-0.82	0.000325892	0.81485	0.82-0.83	0.000254755	0.8265	0.85-0.86	0.000101143	0.8578	0.8-0.81	0.000263135	0.805167	0.9-0.91	9.30406e-05	0.9059	0.86-0.87	0.000186411	0.8622	0.78-0.79	0.000270295	0.7815	0.75-0.76	0.00101031	0.75439	0.76-0.77	8.06192e-05	0.7628	0.78-0.79	8.25423e-05	0.788	0.77-0.78	0.000268144	0.778567	0.77-0.78	0.000226466
0.88-0.89	0.000350385	0.8852	0.81-0.82	0.000176538	0.8197	0.77-0.78	0.000601375	0.775586	0.91-0.92	0.000274549	0.914167	0.84-0.85	0.000367918	0.8447	0.82-0.83	0.000162946	0.825	0.83-0.84	0.000169837	0.83625	0.86-0.87	0.000202286	0.8638	0.81-0.82	0.000175423	0.81375	0.91-0.92	9.30406e-05	0.91	0.88-0.89	9.32053e-05	0.8855	0.8-0.81	0.000180196	0.8083	0.76-0.77	0.000909275	0.763544	0.77-0.78	0.000644953	0.775325	0.79-0.8	0.000330169	0.7959	0.78-0.79	0.000178763	0.78735	0.78-0.79	0.000150978
0.9-0.91	0.000467181	0.904625	0.82-0.83	0.000264807	0.824533	0.78-0.79	0.000257732	0.7835	0.92-0.93	9.15164e-05	0.925	0.85-0.86	0.000275938	0.855367	0.83-0.84	0.000244419	0.833867	0.85-0.86	8.49185e-05	0.857	0.87-0.88	0.000101143	0.8762	0.82-0.83	0.000175423	0.82855	0.93-0.94	9.30406e-05	0.9302	0.9-0.91	0.000279616	0.901867	0.81-0.82	9.00982e-05	0.819	0.77-0.78	0.00141443	0.774329	0.78-0.79	0.000483715	0.7831	0.8-0.81	8.25423e-05	0.8032	0.79-0.8	0.000536289	0.7959	0.79-0.8	0.000150978
0.91-0.92	0.00023359	0.9186	0.83-0.84	0.000441345	0.83642	0.79-0.8	0.000601375	0.796443	0.93-0.94	0.000274549	0.933267	0.86-0.87	0.000275938	0.860633	0.84-0.85	8.1473e-05	0.8476	0.86-0.87	8.49185e-05	0.8633	0.89-0.9	0.000202286	0.89165	0.83-0.84	0.000438558	0.83676	0.94-0.95	9.30406e-05	0.945	0.91-0.92	0.000186411	0.9172	0.82-0.83	0.000180196	0.82315	0.78-0.79	0.000505153	0.78382	0.79-0.8	0.000403096	0.79354	0.81-0.82	0.000165085	0.8104	0.8-0.81	0.000178763	0.806	0.8-0.81	0.000150978
0.92-0.93	0.00023359	0.92795	0.84-0.85	0.000176538	0.8445	0.8-0.81	0.000601375	0.805886	0.94-0.95	0.000183033	0.9442	0.89-0.9	0.000275938	0.894667	0.85-0.86	0.000325892	0.85375	0.87-0.88	0.000254755	0.875633	0.9-0.91	0.000101143	0.9005	0.84-0.85	0.000263135	0.845433	0.95-0.96	0.000186081	0.95315	0.92-0.93	0.000279616	0.9271	0.83-0.84	9.00982e-05	0.8332	0.79-0.8	0.000404122	0.79365	0.81-0.82	0.000161238	0.8148	0.82-0.83	0.000247627	0.8247	0.81-0.82	0.000357526	0.8144	0.81-0.82	0.000226466
0.93-0.94	0.00023359	0.9346	0.86-0.87	0.000264807	0.8653	0.81-0.82	0.000257732	0.8141	0.95-0.96	0.000183033	0.9546	0.9-0.91	9.19794e-05	0.9049	0.86-0.87	0.000162946	0.8652	0.88-0.89	0.000254755	0.883733	0.91-0.92	0.000101143	0.9139	0.85-0.86	0.000263135	0.851567	0.96-0.97	9.30406e-05	0.9645	0.93-0.94	9.32053e-05	0.9332	0.85-0.86	0.000270295	0.856267	0.8-0.81	0.000606183	0.805033	0.82-0.83	0.000644953	0.824675	0.83-0.84	0.000247627	0.836233	0.82-0.83	8.93815e-05	0.822	0.82-0.83	0.000226466
0.94-0.95	0.000116795	0.9463	0.87-0.88	8.8269e-05	0.8704	0.82-0.83	0.000515464	0.825717	0.96-0.97	0.000183033	0.9661	0.91-0.92	0.000183959	0.9146	0.87-0.88	0.000244419	0.8745	0.89-0.9	0.000169837	0.8936	0.92-0.93	0.000202286	0.9251	0.86-0.87	8.77116e-05	0.8636	0.97-0.98	0.000186081	0.97405	0.94-0.95	9.32053e-05	0.9464	0.86-0.87	0.000270295	0.8624	0.81-0.82	0.000606183	0.8142	0.83-0.84	8.06192e-05	0.8315	0.85-0.86	0.000495254	0.856017	0.83-0.84	0.000178763	0.83865	0.83-0.84	0.000301955
0.96-0.97	0.000467181	0.96565	0.88-0.89	8.8269e-05	0.8849	0.83-0.84	0.000171821	0.8321	0.97-0.98	9.15164e-05	0.9792	0.92-0.93	0.000275938	0.922967	0.88-0.89	0.000162946	0.8896	0.9-0.91	0.000424592	0.90426	0.93-0.94	0.000101143	0.9308	0.87-0.88	8.77116e-05	0.8798	0.99-1	0.000186081	0.99665	0.95-0.96	9.32053e-05	0.9556	0.87-0.88	9.00982e-05	0.8756	0.82-0.83	0.000606183	0.82325	0.85-0.86	0.000241857	0.8579	0.87-0.88	0.000247627	0.876933	0.84-0.85	0.000446907	0.84452	0.84-0.85	0.000150978
0.97-0.98	0.00023359	0.9718	0.9-0.91	0.000441345	0.90584	0.84-0.85	0.000257732	0.8457	0.99-1	0.000366066	0.994825	0.93-0.94	9.19794e-05	0.9373	0.89-0.9	0.000162946	0.8939	0.91-0.92	0.000764266	0.916578	0.94-0.95	0.000505715	0.94352	0.88-0.89	0.000175423	0.88355	1-1.01	9.30406e-05	1.0019	0.96-0.97	9.32053e-05	0.9674	0.88-0.89	0.000180196	0.8851	0.83-0.84	0.000707214	0.834514	0.86-0.87	0.000322477	0.86435	0.88-0.89	0.000330169	0.88445	0.85-0.86	0.000178763	0.8562	0.85-0.86	7.54888e-05
0.98-0.99	0.000467181	0.98455	0.91-0.92	8.8269e-05	0.914	0.85-0.86	0.000171821	0.85535	1-1.01	9.15164e-05	1.0034	0.94-0.95	0.000183959	0.9415	0.9-0.91	0.000488838	0.90425	0.92-0.93	0.000254755	0.9247	0.95-0.96	0.000101143	0.9519	0.89-0.9	8.77116e-05	0.897	1.02-1.03	9.30406e-05	1.023	0.97-0.98	9.32053e-05	0.9741	0.89-0.9	0.000270295	0.892067	0.84-0.85	0.000505153	0.84422	0.87-0.88	8.06192e-05	0.8704	0.9-0.91	0.000165085	0.9069	0.86-0.87	8.93815e-05	0.8684	0.86-0.87	0.000150978
0.99-1	0.000116795	0.9941	0.92-0.93	0.000176538	0.9249	0.86-0.87	0.000429553	0.86144	1.01-1.02	9.15164e-05	1.0161	0.97-0.98	9.19794e-05	0.9724	0.91-0.92	0.000407365	0.91242	0.93-0.94	0.000254755	0.935133	0.96-0.97	0.000606857	0.963433	0.9-0.91	8.77116e-05	0.9033	1.05-1.06	0.000186081	1.05775	0.98-0.99	0.000186411	0.98445	0.9-0.91	9.00982e-05	0.9021	0.85-0.86	0.000606183	0.8561	0.88-0.89	0.000241857	0.886733	0.92-0.93	0.000165085	0.9256	0.87-0.88	8.93815e-05	0.8744	0.87-0.88	0.000150978
1.01-1.02	0.000116795	1.0137	0.93-0.94	8.8269e-05	0.9349	0.87-0.88	0.000601375	0.875014	1.02-1.03	9.15164e-05	1.0257	0.98-0.99	9.19794e-05	0.9823	0.92-0.93	0.000244419	0.923333	0.94-0.95	8.49185e-05	0.9462	0.97-0.98	0.000101143	0.975	0.92-0.93	0.000438558	0.92502	1.07-1.08	9.30406e-05	1.0792	1-1.01	0.000279616	1.0028	0.91-0.92	9.00982e-05	0.9179	0.86-0.87	0.000505153	0.86438	0.89-0.9	0.000241857	0.896067	0.95-0.96	0.000660338	0.95415	0.88-0.89	0.000178763	0.881	0.88-0.89	0.000150978
1.03-1.04	0.000350385	1.0364	0.94-0.95	0.000176538	0.94425	0.88-0.89	0.000257732	0.8839	1.05-1.06	0.000183033	1.05375	1-1.01	0.000183959	1.00635	0.93-0.94	0.000733257	0.934856	0.95-0.96	8.49185e-05	0.9598	0.98-0.99	0.000303429	0.986033	0.93-0.94	0.000175423	0.9362	1.08-1.09	9.30406e-05	1.086	1.01-1.02	0.000186411	1.0123	0.92-0.93	9.00982e-05	0.9273	0.87-0.88	0.000505153	0.87388	0.9-0.91	0.000161238	0.90815	0.96-0.97	0.000247627	0.965167	0.89-0.9	0.000268144	0.898433	0.89-0.9	0.000301955
1.04-1.05	0.000467181	1.04642	0.95-0.96	0.000264807	0.954767	0.89-0.9	0.000257732	0.896633	1.06-1.07	9.15164e-05	1.065	1.01-1.02	0.000275938	1.01667	0.94-0.95	0.000244419	0.945133	0.96-0.97	0.000594429	0.964871	0.99-1	0.000101143	0.9938	0.94-0.95	0.000175423	0.9465	1.09-1.1	0.000186081	1.0967	1.03-1.04	9.32053e-05	1.0381	0.93-0.94	9.00982e-05	0.9368	0.88-0.89	0.000606183	0.883	0.91-0.92	0.000161238	0.9162	0.97-0.98	8.25423e-05	0.9764	0.9-0.91	0.000178763	0.9047	0.9-0.91	0.000226466
1.05-1.06	0.00023359	1.0534	0.96-0.97	0.000264807	0.960833	0.9-0.91	0.000257732	0.905567	1.07-1.08	9.15164e-05	1.0743	1.03-1.04	9.19794e-05	1.0358	0.95-0.96	0.000244419	0.954867	0.97-0.98	0.000254755	0.972633	1-1.01	0.000404572	1.00358	0.96-0.97	0.000175423	0.9603	1.1-1.11	9.30406e-05	1.1091	1.04-1.05	0.000279616	1.0457	0.94-0.95	9.00982e-05	0.9477	0.89-0.9	0.000909275	0.895511	0.92-0.93	0.000241857	0.924767	0.99-1	0.000165085	0.9972	0.91-0.92	0.000268144	0.911433	0.91-0.92	0.000226466
1.06-1.07	0.000116795	1.0605	0.97-0.98	0.000264807	0.975033	0.91-0.92	0.000601375	0.916243	1.08-1.09	0.000183033	1.087	1.04-1.05	9.19794e-05	1.0443	0.98-0.99	0.000162946	0.9807	0.98-0.99	8.49185e-05	0.9884	1.01-1.02	0.000101143	1.0159	0.97-0.98	0.000175423	0.97065	1.11-1.12	0.000186081	1.11515	1.05-1.06	0.000279616	1.0544	0.95-0.96	9.00982e-05	0.9552	0.9-0.91	0.000505153	0.9042	0.93-0.94	0.000322477	0.933725	1-1.01	0.000247627	1.00573	0.93-0.94	0.000178763	0.9352	0.92-0.93	0.000377444
1.07-1.08	0.000116795	1.074	0.98-0.99	0.000617883	0.9846	0.92-0.93	0.000515464	0.924633	1.09-1.1	9.15164e-05	1.0983	1.05-1.06	9.19794e-05	1.0578	1-1.01	0.000162946	1.0084	0.99-1	0.000169837	0.99445	1.02-1.03	0.000202286	1.0263	0.99-1	0.000175423	0.99285	1.13-1.14	9.30406e-05	1.1345	1.06-1.07	9.32053e-05	1.0625	0.96-0.97	9.00982e-05	0.9602	0.91-0.92	0.000909275	0.915289	0.94-0.95	0.000564334	0.945471	1.01-1.02	0.000247627	1.01157	0.94-0.95	8.93815e-05	0.9483	0.94-0.95	0.000301955
1.08-1.09	0.000116795	1.0863	1-1.01	0.000353076	1.00635	0.93-0.94	0.000171821	0.93865	1.1-1.11	9.15164e-05	1.109	1.07-1.08	0.000183959	1.07415	1.01-1.02	0.000325892	1.01615	1-1.01	8.49185e-05	1.0062	1.03-1.04	0.000101143	1.0353	1-1.01	0.000175423	1.0061	1.15-1.16	9.30406e-05	1.1536	1.07-1.08	9.32053e-05	1.0796	0.98-0.99	0.000180196	0.9827	0.92-0.93	0.000404122	0.9252	0.95-0.96	0.000161238	0.95235	1.03-1.04	8.25423e-05	1.031	0.95-0.96	0.000268144	0.953967	0.95-0.96	0.000226466
1.11-1.12	0.00023359	1.1144	1.01-1.02	0.000441345	1.01346	0.94-0.95	0.000257732	0.943767	1.11-1.12	0.000183033	1.11715	1.08-1.09	0.000183959	1.08325	1.02-1.03	8.1473e-05	1.0235	1.01-1.02	8.49185e-05	1.0113	1.04-1.05	0.000202286	1.04635	1.01-1.02	8.77116e-05	1.0186	1.16-1.17	9.30406e-05	1.167	1.08-1.09	9.32053e-05	1.0804	0.99-1	0.000180196	0.9926	0.93-0.94	0.000404122	0.935425	0.96-0.97	8.06192e-05	0.9629	1.04-1.05	0.000165085	1.0452	0.96-0.97	8.93815e-05	0.9605	0.96-0.97	0.000452933
1.14-1.15	0.000116795	1.1477	1.02-1.03	8.8269e-05	1.0254	0.96-0.97	8.59107e-05	0.9649	1.12-1.13	9.15164e-05	1.1275	1.1-1.11	0.000183959	1.1093	1.03-1.04	8.1473e-05	1.0367	1.02-1.03	0.000339674	1.02622	1.05-1.06	0.000101143	1.0506	1.02-1.03	8.77116e-05	1.0211	1.17-1.18	9.30406e-05	1.1709	1.09-1.1	0.000186411	1.09815	1.01-1.02	9.00982e-05	1.0188	0.94-0.95	0.000505153	0.94468	0.97-0.98	0.000403096	0.97688	1.05-1.06	0.000330169	1.0569	0.97-0.98	0.000268144	0.978	0.97-0.98	0.000301955
1.15-1.16	0.00023359	1.1546	1.03-1.04	0.000264807	1.03847	0.97-0.98	0.000515464	0.974533	1.13-1.14	9.15164e-05	1.1325	1.11-1.12	0.000183959	1.1141	1.04-1.05	8.1473e-05	1.0497	1.03-1.04	0.000254755	1.0332	1.07-1.08	0.000202286	1.07235	1.04-1.05	0.000175423	1.04355	1.2-1.21	9.30406e-05	1.2084	1.1-1.11	0.000186411	1.10285	1.03-1.04	9.00982e-05	1.0335	0.95-0.96	0.000606183	0.954717	0.98-0.99	0.000241857	0.9839	1.06-1.07	0.000412712	1.065	0.98-0.99	0.000536289	0.986967	0.98-0.99	0.000528422
1.17-1.18	0.000583976	1.17594	1.04-1.05	8.8269e-05	1.0471	0.98-0.99	0.000171821	0.9839	1.14-1.15	9.15164e-05	1.1493	1.12-1.13	9.19794e-05	1.129	1.05-1.06	0.000407365	1.0554	1.04-1.05	8.49185e-05	1.0424	1.08-1.09	0.000101143	1.0856	1.05-1.06	8.77116e-05	1.0552	1.21-1.22	0.000186081	1.21605	1.11-1.12	0.000186411	1.11575	1.04-1.05	0.000180196	1.04565	0.96-0.97	0.000404122	0.965525	0.99-1	0.000483715	0.996167	1.07-1.08	0.000330169	1.075	1-1.01	0.00062567	1.0067	0.99-1	0.000150978
1.22-1.23	0.00023359	1.22895	1.05-1.06	8.8269e-05	1.05	0.99-1	0.000429553	0.99618	1.15-1.16	9.15164e-05	1.1563	1.15-1.16	9.19794e-05	1.1569	1.06-1.07	0.000244419	1.067	1.05-1.06	0.000254755	1.05533	1.1-1.11	0.000202286	1.10835	1.07-1.08	0.000175423	1.07655	1.22-1.23	9.30406e-05	1.2201	1.12-1.13	9.32053e-05	1.1293	1.06-1.07	9.00982e-05	1.0689	0.97-0.98	0.000505153	0.9724	1-1.01	0.000161238	1.0076	1.08-1.09	8.25423e-05	1.0803	1.01-1.02	8.93815e-05	1.0115	1-1.01	0.000301955
1.24-1.25	0.000116795	1.2419	1.06-1.07	0.000264807	1.06263	1-1.01	0.000257732	1.00703	1.16-1.17	9.15164e-05	1.1626	1.18-1.19	0.000183959	1.18235	1.07-1.08	8.1473e-05	1.0788	1.07-1.08	0.000169837	1.0765	1.11-1.12	0.000303429	1.11193	1.09-1.1	0.000263135	1.09593	1.23-1.24	9.30406e-05	1.2304	1.19-1.2	9.32053e-05	1.1952	1.08-1.09	9.00982e-05	1.0862	0.98-0.99	0.000505153	0.98342	1.01-1.02	8.06192e-05	1.0168	1.09-1.1	0.000165085	1.09695	1.02-1.03	0.000178763	1.02425	1.01-1.02	7.54888e-05
1.25-1.26	0.000116795	1.2575	1.08-1.09	0.000353076	1.08675	1.01-1.02	0.000601375	1.01576	1.18-1.19	0.000183033	1.18525	1.19-1.2	0.000275938	1.1961	1.08-1.09	0.000162946	1.08415	1.08-1.09	8.49185e-05	1.0848	1.13-1.14	0.000202286	1.1373	1.1-1.11	8.77116e-05	1.1004	1.24-1.25	0.000186081	1.2426	1.21-1.22	0.000186411	1.2145	1.1-1.11	0.000180196	1.10575	0.99-1	0.000404122	0.9971	1.02-1.03	0.000644953	1.02486	1.1-1.11	8.25423e-05	1.1052	1.03-1.04	0.000178763	1.03455	1.02-1.03	7.54888e-05
1.26-1.27	0.00023359	1.2675	1.09-1.1	8.8269e-05	1.0904	1.02-1.03	0.000257732	1.02453	1.19-1.2	0.000183033	1.1945	1.2-1.21	9.19794e-05	1.2021	1.09-1.1	0.000244419	1.09583	1.09-1.1	0.000169837	1.0971	1.15-1.16	0.000202286	1.15715	1.11-1.12	0.000175423	1.1144	1.26-1.27	9.30406e-05	1.2632	1.22-1.23	0.000186411	1.2241	1.11-1.12	0.000270295	1.1128	1-1.01	0.000606183	1.00758	1.03-1.04	0.000241857	1.03457	1.11-1.12	8.25423e-05	1.1105	1.04-1.05	0.000357526	1.04567	1.03-1.04	7.54888e-05
1.27-1.28	0.000350385	1.2711	1.1-1.11	0.000176538	1.1096	1.03-1.04	0.000171821	1.03315	1.2-1.21	9.15164e-05	1.2089	1.21-1.22	0.000183959	1.2113	1.12-1.13	0.000325892	1.12413	1.1-1.11	0.000339674	1.10347	1.16-1.17	0.000101143	1.1662	1.12-1.13	8.77116e-05	1.1245	1.31-1.32	9.30406e-05	1.3109	1.23-1.24	9.32053e-05	1.2361	1.12-1.13	9.00982e-05	1.1297	1.01-1.02	0.000303092	1.0169	1.04-1.05	0.000322477	1.04365	1.12-1.13	8.25423e-05	1.1297	1.05-1.06	0.000357526	1.05757	1.04-1.05	0.000301955
1.29-1.3	0.000116795	1.292	1.12-1.13	8.8269e-05	1.1234	1.04-1.05	8.59107e-05	1.0411	1.21-1.22	9.15164e-05	1.2166	1.22-1.23	9.19794e-05	1.2233	1.13-1.14	8.1473e-05	1.132	1.12-1.13	0.000254755	1.12277	1.18-1.19	0.000101143	1.1824	1.13-1.14	0.000175423	1.13065	1.32-1.33	9.30406e-05	1.329	1.24-1.25	9.32053e-05	1.2402	1.13-1.14	0.000180196	1.1383	1.02-1.03	0.000404122	1.02533	1.05-1.06	0.000403096	1.05396	1.13-1.14	0.000165085	1.13675	1.06-1.07	0.000268144	1.06363	1.05-1.06	7.54888e-05
1.3-1.31	0.000350385	1.30127	1.13-1.14	0.000353076	1.13627	1.05-1.06	0.000343643	1.05445	1.23-1.24	0.000274549	1.23303	1.24-1.25	9.19794e-05	1.2461	1.14-1.15	8.1473e-05	1.1453	1.13-1.14	8.49185e-05	1.136	1.19-1.2	0.000101143	1.1903	1.14-1.15	0.000175423	1.1443	1.33-1.34	0.000186081	1.3317	1.25-1.26	0.000466027	1.25632	1.14-1.15	0.000180196	1.14175	1.03-1.04	0.000505153	1.03328	1.06-1.07	0.000161238	1.0667	1.14-1.15	0.000165085	1.1403	1.07-1.08	8.93815e-05	1.0764	1.06-1.07	7.54888e-05
1.31-1.32	0.00023359	1.31225	1.14-1.15	8.8269e-05	1.1424	1.06-1.07	0.000515464	1.06418	1.24-1.25	9.15164e-05	1.2403	1.25-1.26	9.19794e-05	1.2554	1.15-1.16	8.1473e-05	1.1501	1.14-1.15	0.000169837	1.14395	1.2-1.21	0.000101143	1.2094	1.16-1.17	0.000175423	1.1641	1.35-1.36	9.30406e-05	1.3585	1.28-1.29	9.32053e-05	1.2807	1.15-1.16	0.000180196	1.15375	1.04-1.05	0.000606183	1.04653	1.07-1.08	0.000644953	1.07418	1.16-1.17	8.25423e-05	1.1682	1.08-1.09	0.000268144	1.0855	1.07-1.08	7.54888e-05
1.32-1.33	0.000116795	1.3237	1.16-1.17	0.000176538	1.16705	1.07-1.08	8.59107e-05	1.0792	1.25-1.26	0.000274549	1.25687	1.26-1.27	9.19794e-05	1.2657	1.16-1.17	0.000244419	1.16583	1.15-1.16	0.000424592	1.15556	1.21-1.22	0.000303429	1.2143	1.17-1.18	8.77116e-05	1.1735	1.39-1.4	0.000186081	1.39255	1.31-1.32	9.32053e-05	1.3158	1.17-1.18	0.000270295	1.1743	1.05-1.06	0.000707214	1.0542	1.08-1.09	0.000241857	1.08753	1.17-1.18	8.25423e-05	1.1727	1.09-1.1	0.000178763	1.0948	1.08-1.09	7.54888e-05
1.33-1.34	0.000116795	1.3391	1.17-1.18	8.8269e-05	1.1756	1.08-1.09	0.000515464	1.08455	1.26-1.27	9.15164e-05	1.2676	1.27-1.28	0.000183959	1.27105	1.17-1.18	0.000162946	1.1749	1.16-1.17	0.000169837	1.1621	1.22-1.23	0.000202286	1.22325	1.18-1.19	0.000263135	1.1849	1.43-1.44	9.30406e-05	1.4308	1.34-1.35	0.000186411	1.3475	1.19-1.2	0.000180196	1.19225	1.06-1.07	0.000303092	1.06543	1.09-1.1	0.000241857	1.0994	1.19-1.2	8.25423e-05	1.192	1.11-1.12	0.000268144	1.1138	1.09-1.1	0.000226466
1.34-1.35	0.000116795	1.3492	1.19-1.2	8.8269e-05	1.1983	1.09-1.1	8.59107e-05	1.0965	1.28-1.29	0.000183033	1.28645	1.3-1.31	9.19794e-05	1.3096	1.18-1.19	8.1473e-05	1.1815	1.17-1.18	0.000254755	1.17673	1.24-1.25	0.000101143	1.2421	1.19-1.2	0.000263135	1.19743	1.48-1.49	0.000279122	1.4881	1.35-1.36	0.000186411	1.3547	1.2-1.21	9.00982e-05	1.2078	1.07-1.08	0.000404122	1.07678	1.1-1.11	0.000403096	1.10442	1.2-1.21	0.000165085	1.20425	1.12-1.13	0.000178763	1.1259	1.1-1.11	7.54888e-05
1.36-1.37	0.000116795	1.3625	1.2-1.21	0.000353076	1.20332	1.1-1.11	0.000171821	1.1066	1.29-1.3	0.000183033	1.2922	1.31-1.32	9.19794e-05	1.3173	1.2-1.21	0.000162946	1.20385	1.18-1.19	8.49185e-05	1.1848	1.31-1.32	0.000101143	1.3124	1.2-1.21	8.77116e-05	1.2065	1.5-1.51	9.30406e-05	1.5013	1.36-1.37	0.000279616	1.3664	1.23-1.24	0.000180196	1.23525	1.08-1.09	0.000808244	1.08394	1.11-1.12	0.000322477	1.11455	1.21-1.22	8.25423e-05	1.2186	1.13-1.14	0.000446907	1.13598	1.11-1.12	0.000150978
1.37-1.38	0.000116795	1.3786	1.23-1.24	0.000176538	1.23605	1.11-1.12	0.000257732	1.11433	1.3-1.31	9.15164e-05	1.3089	1.34-1.35	0.000183959	1.34555	1.21-1.22	8.1473e-05	1.2183	1.19-1.2	0.000254755	1.19293	1.37-1.38	0.000404572	1.37485	1.22-1.23	0.000175423	1.22515	1.57-1.58	9.30406e-05	1.576	1.37-1.38	9.32053e-05	1.3738	1.24-1.25	0.000180196	1.2451	1.09-1.1	0.000404122	1.0948	1.12-1.13	0.000241857	1.12483	1.24-1.25	0.000165085	1.24685	1.14-1.15	0.000178763	1.144	1.12-1.13	0.000226466
1.38-1.39	0.000350385	1.386	1.24-1.25	0.000264807	1.2484	1.12-1.13	0.000171821	1.12705	1.31-1.32	0.000183033	1.31455	1.35-1.36	9.19794e-05	1.3556	1.22-1.23	0.000162946	1.22635	1.22-1.23	8.49185e-05	1.2265	1.39-1.4	0.000303429	1.3936	1.23-1.24	0.000263135	1.23653	1.58-1.59	9.30406e-05	1.5898	1.39-1.4	0.000279616	1.3946	1.27-1.28	0.000270295	1.27893	1.1-1.11	0.000202061	1.10465	1.13-1.14	0.000241857	1.1324	1.26-1.27	0.000330169	1.26575	1.15-1.16	0.000446907	1.15602	1.13-1.14	7.54888e-05
1.4-1.41	0.000116795	1.4084	1.25-1.26	8.8269e-05	1.2542	1.13-1.14	0.000773196	1.13528	1.34-1.35	9.15164e-05	1.3447	1.36-1.37	0.000183959	1.3659	1.23-1.24	0.000162946	1.23665	1.23-1.24	8.49185e-05	1.2301	1.4-1.41	0.000101143	1.4061	1.25-1.26	0.000263135	1.25207	1.61-1.62	0.000186081	1.6178	1.41-1.42	9.32053e-05	1.4121	1.28-1.29	9.00982e-05	1.2844	1.11-1.12	0.000505153	1.11728	1.14-1.15	0.000483715	1.14722	1.27-1.28	0.000165085	1.2755	1.17-1.18	0.000178763	1.1713	1.14-1.15	0.000226466
1.43-1.44	0.00023359	1.4319	1.26-1.27	8.8269e-05	1.2631	1.14-1.15	0.000171821	1.1482	1.35-1.36	0.000274549	1.35773	1.37-1.38	0.000183959	1.3755	1.24-1.25	0.000407365	1.24264	1.26-1.27	0.000169837	1.2659	1.41-1.42	0.000202286	1.41285	1.26-1.27	0.000438558	1.26552	1.62-1.63	9.30406e-05	1.6261	1.42-1.43	9.32053e-05	1.4262	1.29-1.3	0.000270295	1.29373	1.12-1.13	0.000303092	1.1252	1.15-1.16	0.000241857	1.15347	1.28-1.29	0.000247627	1.28427	1.18-1.19	0.000178763	1.18685	1.15-1.16	7.54888e-05
1.45-1.46	0.00023359	1.4564	1.29-1.3	0.000529614	1.29478	1.16-1.17	0.000429553	1.1658	1.37-1.38	9.15164e-05	1.3795	1.4-1.41	0.000275938	1.40293	1.25-1.26	0.000244419	1.25303	1.28-1.29	0.000169837	1.2879	1.43-1.44	0.000202286	1.4384	1.28-1.29	0.000175423	1.2825	1.64-1.65	0.000186081	1.6452	1.43-1.44	0.000186411	1.4351	1.3-1.31	9.00982e-05	1.3052	1.13-1.14	0.000505153	1.13548	1.16-1.17	0.000161238	1.167	1.29-1.3	0.000165085	1.2958	1.19-1.2	0.000178763	1.1971	1.16-1.17	0.000150978
1.46-1.47	0.00023359	1.46485	1.3-1.31	0.000176538	1.30525	1.17-1.18	8.59107e-05	1.1766	1.38-1.39	9.15164e-05	1.3868	1.42-1.43	9.19794e-05	1.4232	1.26-1.27	0.000325892	1.26768	1.3-1.31	0.000254755	1.30443	1.44-1.45	0.000101143	1.4492	1.29-1.3	0.00052627	1.29765	1.65-1.66	9.30406e-05	1.6519	1.44-1.45	9.32053e-05	1.4414	1.32-1.33	9.00982e-05	1.3289	1.14-1.15	0.000606183	1.14345	1.17-1.18	8.06192e-05	1.1734	1.3-1.31	0.000165085	1.30795	1.21-1.22	0.000178763	1.2154	1.18-1.19	0.000301955
1.47-1.48	0.000116795	1.4776	1.31-1.32	0.000176538	1.31525	1.18-1.19	0.000171821	1.18585	1.39-1.4	0.000183033	1.3955	1.45-1.46	9.19794e-05	1.4525	1.27-1.28	8.1473e-05	1.2745	1.33-1.34	0.000169837	1.3327	1.45-1.46	0.000404572	1.4581	1.3-1.31	0.000350846	1.3055	1.66-1.67	9.30406e-05	1.6689	1.45-1.46	9.32053e-05	1.4596	1.33-1.34	9.00982e-05	1.3384	1.15-1.16	0.000505153	1.1573	1.18-1.19	0.000241857	1.18497	1.31-1.32	8.25423e-05	1.3105	1.22-1.23	0.000268144	1.2256	1.19-1.2	0.000150978
1.48-1.49	0.000116795	1.4868	1.33-1.34	0.000353076	1.33757	1.19-1.2	8.59107e-05	1.1985	1.41-1.42	9.15164e-05	1.4186	1.46-1.47	9.19794e-05	1.4699	1.28-1.29	0.000162946	1.2843	1.35-1.36	8.49185e-05	1.358	1.47-1.48	0.000303429	1.47383	1.31-1.32	8.77116e-05	1.3133	1.71-1.72	9.30406e-05	1.7151	1.46-1.47	0.000186411	1.46755	1.36-1.37	0.000270295	1.36433	1.16-1.17	0.000202061	1.1635	1.19-1.2	0.000322477	1.19483	1.34-1.35	8.25423e-05	1.3495	1.23-1.24	0.000268144	1.23413	1.2-1.21	0.000301955
1.49-1.5	0.000116795	1.4982	1.34-1.35	8.8269e-05	1.3417	1.2-1.21	0.000515464	1.20668	1.42-1.43	9.15164e-05	1.4268	1.49-1.5	0.000183959	1.49275	1.29-1.3	0.000733257	1.29698	1.37-1.38	8.49185e-05	1.3727	1.48-1.49	0.000101143	1.4896	1.33-1.34	0.000438558	1.33842	1.73-1.74	0.000372162	1.7315	1.47-1.48	9.32053e-05	1.4714	1.38-1.39	0.000180196	1.38325	1.17-1.18	0.000303092	1.17533	1.2-1.21	8.06192e-05	1.2048	1.35-1.36	0.000165085	1.3539	1.24-1.25	8.93815e-05	1.2446	1.21-1.22	0.000377444
1.51-1.52	0.000116795	1.5134	1.35-1.36	0.000264807	1.35557	1.21-1.22	0.000687285	1.21517	1.44-1.45	9.15164e-05	1.4455	1.51-1.52	9.19794e-05	1.5104	1.31-1.32	0.000162946	1.3169	1.38-1.39	0.000169837	1.38405	1.49-1.5	0.000101143	1.497	1.34-1.35	8.77116e-05	1.3479	1.8-1.81	9.30406e-05	1.8003	1.49-1.5	0.000186411	1.4979	1.4-1.41	0.000270295	1.40607	1.18-1.19	0.000606183	1.18408	1.21-1.22	0.000322477	1.21235	1.38-1.39	0.000165085	1.3853	1.25-1.26	8.93815e-05	1.2521	1.23-1.24	0.000150978
1.54-1.55	0.000116795	1.5427	1.39-1.4	0.000264807	1.39457	1.22-1.23	0.000343643	1.22445	1.46-1.47	9.15164e-05	1.4606	1.53-1.54	9.19794e-05	1.537	1.32-1.33	0.000244419	1.32423	1.39-1.4	8.49185e-05	1.3909	1.5-1.51	0.000101143	1.5074	1.35-1.36	0.000175423	1.3546	1.83-1.84	9.30406e-05	1.8313	1.5-1.51	9.32053e-05	1.5079	1.41-1.42	0.000180196	1.4136	1.19-1.2	0.000606183	1.19423	1.22-1.23	0.000161238	1.22845	1.39-1.4	0.000247627	1.3953	1.26-1.27	0.000178763	1.26105	1.24-1.25	0.000226466
1.57-1.58	0.000467181	1.57275	1.4-1.41	8.8269e-05	1.4011	1.23-1.24	0.000343643	1.2336	1.47-1.48	9.15164e-05	1.4732	1.55-1.56	9.19794e-05	1.5581	1.33-1.34	0.000162946	1.33595	1.4-1.41	8.49185e-05	1.407	1.56-1.57	0.000404572	1.5665	1.41-1.42	8.77116e-05	1.414	1.87-1.88	9.30406e-05	1.8732	1.52-1.53	0.000186411	1.52755	1.45-1.46	9.00982e-05	1.4538	1.2-1.21	0.000202061	1.20705	1.23-1.24	0.000483715	1.23408	1.42-1.43	8.25423e-05	1.4201	1.27-1.28	0.000178763	1.2748	1.25-1.26	0.00060391
1.58-1.59	0.00023359	1.58425	1.41-1.42	0.000264807	1.41853	1.24-1.25	0.000429553	1.246	1.48-1.49	9.15164e-05	1.4803	1.57-1.58	9.19794e-05	1.5747	1.34-1.35	0.000244419	1.34423	1.42-1.43	8.49185e-05	1.4261	1.57-1.58	0.000101143	1.572	1.42-1.43	8.77116e-05	1.4294	1.95-1.96	9.30406e-05	1.9594	1.55-1.56	0.000186411	1.558	1.48-1.49	9.00982e-05	1.4876	1.21-1.22	0.000202061	1.21565	1.24-1.25	0.000161238	1.2453	1.43-1.44	0.000165085	1.4334	1.28-1.29	0.000178763	1.28705	1.26-1.27	0.000452933
1.59-1.6	0.000116795	1.5922	1.42-1.43	0.000176538	1.42625	1.25-1.26	0.000257732	1.2538	1.5-1.51	9.15164e-05	1.5045	1.61-1.62	9.19794e-05	1.6124	1.35-1.36	0.000407365	1.35386	1.43-1.44	0.000169837	1.4366	1.58-1.59	0.000303429	1.58367	1.43-1.44	0.000175423	1.43355	1.99-2	0.000186081	1.99175	1.57-1.58	9.32053e-05	1.5737	1.49-1.5	9.00982e-05	1.4933	1.22-1.23	0.000202061	1.2216	1.25-1.26	0.000403096	1.25554	1.45-1.46	8.25423e-05	1.4556	1.3-1.31	8.93815e-05	1.3064	1.27-1.28	0.000226466
1.6-1.61	0.000116795	1.6085	1.43-1.44	8.8269e-05	1.4356	1.26-1.27	0.000171821	1.26305	1.51-1.52	9.15164e-05	1.5128	1.74-1.75	0.000367918	1.7471	1.36-1.37	0.000244419	1.3662	1.45-1.46	0.000254755	1.4527	1.62-1.63	0.000101143	1.6218	1.44-1.45	8.77116e-05	1.4468	2.01-2.02	9.30406e-05	2.0172	1.59-1.6	0.000186411	1.594	1.51-1.52	9.00982e-05	1.5148	1.23-1.24	0.000101031	1.2303	1.26-1.27	0.000241857	1.26323	1.47-1.48	8.25423e-05	1.4759	1.31-1.32	0.000178763	1.31485	1.28-1.29	0.000301955
1.61-1.62	0.000350385	1.61787	1.44-1.45	0.000264807	1.4434	1.27-1.28	8.59107e-05	1.2785	1.52-1.53	9.15164e-05	1.5278	1.75-1.76	0.000183959	1.754	1.37-1.38	0.000325892	1.3762	1.46-1.47	8.49185e-05	1.4606	1.63-1.64	0.000202286	1.63685	1.45-1.46	0.000175423	1.4557	2.21-2.22	9.30406e-05	2.2169	1.61-1.62	0.000186411	1.6121	1.52-1.53	0.000270295	1.5258	1.24-1.25	0.000404122	1.24362	1.27-1.28	0.000161238	1.27285	1.48-1.49	8.25423e-05	1.4812	1.32-1.33	0.000446907	1.32476	1.29-1.3	7.54888e-05
1.62-1.63	0.00023359	1.6259	1.45-1.46	0.000264807	1.45433	1.28-1.29	0.000343643	1.28487	1.54-1.55	0.000183033	1.547	1.82-1.83	9.19794e-05	1.8281	1.38-1.39	8.1473e-05	1.3866	1.47-1.48	0.000254755	1.4724	1.66-1.67	0.000101143	1.6609	1.46-1.47	8.77116e-05	1.4621	2.23-2.24	9.30406e-05	2.2372	1.62-1.63	9.32053e-05	1.6296	1.54-1.55	0.000180196	1.5484	1.25-1.26	0.000202061	1.25485	1.28-1.29	0.000241857	1.281	1.49-1.5	0.000165085	1.4948	1.33-1.34	0.000446907	1.33348	1.3-1.31	0.000226466
1.64-1.65	0.00023359	1.64635	1.46-1.47	0.000176538	1.4638	1.29-1.3	0.000343643	1.29515	1.55-1.56	0.000183033	1.5547	1.86-1.87	9.19794e-05	1.8663	1.39-1.4	0.000570311	1.39609	1.51-1.52	0.000254755	1.51527	1.67-1.68	0.000202286	1.67375	1.47-1.48	8.77116e-05	1.4701	2.3-2.31	9.30406e-05	2.3	1.63-1.64	0.000186411	1.6328	1.57-1.58	9.00982e-05	1.5723	1.26-1.27	0.000101031	1.2626	1.29-1.3	8.06192e-05	1.2926	1.51-1.52	0.000165085	1.51475	1.34-1.35	8.93815e-05	1.349	1.31-1.32	0.000226466
1.65-1.66	0.000116795	1.6518	1.48-1.49	0.000176538	1.48305	1.3-1.31	0.000601375	1.30666	1.56-1.57	0.000183033	1.5665	1.92-1.93	9.19794e-05	1.9263	1.4-1.41	0.000325892	1.40195	1.52-1.53	8.49185e-05	1.5298	1.69-1.7	0.000101143	1.6994	1.48-1.49	0.000175423	1.4835	2.37-2.38	9.30406e-05	2.3748	1.64-1.65	9.32053e-05	1.6469	1.61-1.62	9.00982e-05	1.6121	1.27-1.28	0.000101031	1.2705	1.3-1.31	0.000161238	1.302	1.54-1.55	8.25423e-05	1.5417	1.35-1.36	0.000178763	1.35425	1.32-1.33	7.54888e-05
1.67-1.68	0.000116795	1.6741	1.49-1.5	0.000176538	1.4938	1.31-1.32	0.000601375	1.31709	1.58-1.59	0.000183033	1.586	2.03-2.04	0.000183959	2.0313	1.42-1.43	0.000325892	1.4261	1.53-1.54	8.49185e-05	1.5355	1.7-1.71	0.000101143	1.7042	1.49-1.5	0.000175423	1.49675	2.4-2.41	9.30406e-05	2.4036	1.66-1.67	9.32053e-05	1.6614	1.62-1.63	0.000180196	1.6249	1.28-1.29	0.000505153	1.28506	1.31-1.32	0.000161238	1.3123	1.55-1.56	8.25423e-05	1.5569	1.36-1.37	0.000268144	1.3665	1.33-1.34	0.000226466
1.68-1.69	0.000350385	1.682	1.5-1.51	0.000264807	1.50663	1.32-1.33	0.000171821	1.3252	1.59-1.6	9.15164e-05	1.5945	2.1-2.11	9.19794e-05	2.1067	1.45-1.46	0.000407365	1.453	1.54-1.55	8.49185e-05	1.5403	1.71-1.72	0.000101143	1.7158	1.5-1.51	8.77116e-05	1.5027	2.47-2.48	9.30406e-05	2.4717	1.67-1.68	0.000186411	1.6758	1.63-1.64	0.000270295	1.6323	1.29-1.3	0.000606183	1.29565	1.32-1.33	0.000322477	1.32513	1.56-1.57	0.000165085	1.5687	1.37-1.38	8.93815e-05	1.3722	1.34-1.35	0.000226466
1.69-1.7	0.000116795	1.6979	1.52-1.53	8.8269e-05	1.5251	1.33-1.34	0.000343643	1.33648	1.6-1.61	9.15164e-05	1.6002	2.19-2.2	9.19794e-05	2.1957	1.46-1.47	8.1473e-05	1.4642	1.55-1.56	0.000169837	1.5524	1.72-1.73	0.000101143	1.7291	1.51-1.52	8.77116e-05	1.5128	2.51-2.52	9.30406e-05	2.5139	1.68-1.69	9.32053e-05	1.6846	1.64-1.65	9.00982e-05	1.6479	1.3-1.31	0.000303092	1.30593	1.33-1.34	0.000161238	1.3324	1.57-1.58	0.000330169	1.57612	1.4-1.41	8.93815e-05	1.4007	1.35-1.36	0.000150978
1.72-1.73	0.000116795	1.721	1.54-1.55	8.8269e-05	1.542	1.34-1.35	8.59107e-05	1.3494	1.61-1.62	9.15164e-05	1.6159	2.24-2.25	9.19794e-05	2.2444	1.47-1.48	8.1473e-05	1.4744	1.58-1.59	8.49185e-05	1.5826	1.73-1.74	0.000202286	1.7379	1.52-1.53	8.77116e-05	1.5209	2.52-2.53	9.30406e-05	2.5248	1.7-1.71	9.32053e-05	1.7042	1.66-1.67	0.000180196	1.6631	1.31-1.32	0.00101031	1.31477	1.34-1.35	0.000403096	1.34492	1.6-1.61	8.25423e-05	1.6071	1.43-1.44	0.000357526	1.43673	1.36-1.37	0.000150978
1.73-1.74	0.000116795	1.7354	1.57-1.58	8.8269e-05	1.5743	1.35-1.36	0.000343643	1.35702	1.62-1.63	0.000183033	1.6273	2.26-2.27	9.19794e-05	2.2686	1.48-1.49	8.1473e-05	1.481	1.61-1.62	8.49185e-05	1.6186	1.84-1.85	0.000202286	1.8428	1.54-1.55	8.77116e-05	1.5441	2.74-2.75	9.30406e-05	2.7435	1.71-1.72	9.32053e-05	1.7183	1.75-1.76	9.00982e-05	1.756	1.32-1.33	0.000303092	1.32413	1.35-1.36	0.000161238	1.3541	1.61-1.62	0.000330169	1.61538	1.46-1.47	0.000446907	1.46638	1.38-1.39	0.000226466
1.75-1.76	0.000116795	1.7521	1.58-1.59	8.8269e-05	1.5837	1.36-1.37	0.000171821	1.36415	1.63-1.64	9.15164e-05	1.6318	2.31-2.32	9.19794e-05	2.3162	1.49-1.5	0.000162946	1.49425	1.62-1.63	8.49185e-05	1.6228	1.87-1.88	0.000101143	1.8739	1.57-1.58	0.000263135	1.5744	2.81-2.82	9.30406e-05	2.8139	1.72-1.73	9.32053e-05	1.7263	1.79-1.8	0.000180196	1.796	1.33-1.34	0.000404122	1.33465	1.36-1.37	0.000161238	1.3652	1.62-1.63	8.25423e-05	1.6274	1.47-1.48	0.000178763	1.47455	1.39-1.4	0.000301955
1.76-1.77	0.000116795	1.7645	1.59-1.6	0.000264807	1.59277	1.37-1.38	8.59107e-05	1.377	1.65-1.66	9.15164e-05	1.6519	2.36-2.37	9.19794e-05	2.3673	1.5-1.51	8.1473e-05	1.5032	1.63-1.64	8.49185e-05	1.6394	1.95-1.96	0.000101143	1.9574	1.6-1.61	0.000263135	1.60263	2.93-2.94	9.30406e-05	2.9338	1.74-1.75	9.32053e-05	1.7419	1.8-1.81	0.000270295	1.80387	1.34-1.35	0.000303092	1.3431	1.37-1.38	0.000322477	1.3751	1.64-1.65	0.000165085	1.6422	1.48-1.49	8.93815e-05	1.4839	1.4-1.41	0.000301955
1.8-1.81	0.000116795	1.8057	1.6-1.61	8.8269e-05	1.6066	1.39-1.4	0.000429553	1.39468	1.67-1.68	9.15164e-05	1.6719	2.52-2.53	9.19794e-05	2.5279	1.51-1.52	0.000407365	1.51772	1.64-1.65	8.49185e-05	1.6432	2-2.01	0.000101143	2.0024	1.62-1.63	0.000263135	1.6252	3.39-3.4	9.30406e-05	3.3915	1.75-1.76	9.32053e-05	1.7515	1.81-1.82	0.000360393	1.81533	1.35-1.36	0.000404122	1.3565	1.38-1.39	0.000564334	1.38634	1.65-1.66	8.25423e-05	1.6534	1.49-1.5	8.93815e-05	1.4935	1.41-1.42	7.54888e-05
1.82-1.83	0.000116795	1.8216	1.61-1.62	0.000264807	1.6158	1.4-1.41	0.000171821	1.404	1.69-1.7	9.15164e-05	1.6944				1.52-1.53	0.000162946	1.5267	1.65-1.66	8.49185e-05	1.6531	2.01-2.02	0.000101143	2.0189	1.63-1.64	8.77116e-05	1.6309	4.94-4.95	9.30406e-05	4.9408	1.76-1.77	0.000186411	1.76325	1.84-1.85	9.00982e-05	1.8471	1.36-1.37	0.000202061	1.3632	1.39-1.4	0.000241857	1.3967	1.66-1.67	8.25423e-05	1.6677	1.5-1.51	8.93815e-05	1.5014	1.42-1.43	0.000150978
1.84-1.85	0.00023359	1.84435	1.62-1.63	8.8269e-05	1.6276	1.41-1.42	0.000171821	1.41685	1.74-1.75	9.15164e-05	1.7424				1.53-1.54	8.1473e-05	1.5348	1.67-1.68	8.49185e-05	1.6734	2.08-2.09	0.000202286	2.0876	1.66-1.67	8.77116e-05	1.6659				1.79-1.8	9.32053e-05	1.7964	1.89-1.9	9.00982e-05	1.8937	1.37-1.38	0.000505153	1.374	1.4-1.41	0.000322477	1.40595	1.67-1.68	0.000165085	1.67165	1.51-1.52	8.93815e-05	1.5151	1.44-1.45	0.000150978
1.86-1.87	0.000116795	1.8614	1.64-1.65	8.8269e-05	1.642	1.42-1.43	8.59107e-05	1.4278	1.76-1.77	9.15164e-05	1.765				1.55-1.56	8.1473e-05	1.5573	1.68-1.69	8.49185e-05	1.684	2.13-2.14	0.000101143	2.1389	1.68-1.69	8.77116e-05	1.6814				1.81-1.82	9.32053e-05	1.8192	1.9-1.91	0.000180196	1.9082	1.38-1.39	0.000303092	1.38257	1.41-1.42	0.000322477	1.41485	1.68-1.69	0.000165085	1.68315	1.53-1.54	8.93815e-05	1.5322	1.45-1.46	0.000150978
1.87-1.88	0.000116795	1.8743	1.65-1.66	8.8269e-05	1.6507	1.44-1.45	0.000171821	1.44485	1.78-1.79	9.15164e-05	1.7891				1.56-1.57	8.1473e-05	1.5699	1.69-1.7	0.000254755	1.6966	2.16-2.17	0.000101143	2.1695	1.69-1.7	8.77116e-05	1.6948				1.82-1.83	9.32053e-05	1.8285	1.91-1.92	9.00982e-05	1.913	1.39-1.4	0.000404122	1.39518	1.42-1.43	0.000403096	1.42522	1.69-1.7	0.000247627	1.69713	1.54-1.55	0.000178763	1.5448	1.46-1.47	7.54888e-05
1.88-1.89	0.000116795	1.8891	1.67-1.68	8.8269e-05	1.6707	1.45-1.46	0.000257732	1.4526	1.79-1.8	0.000274549	1.79637				1.58-1.59	8.1473e-05	1.5838	1.7-1.71	8.49185e-05	1.7067	2.17-2.18	0.000101143	2.1752	1.72-1.73	8.77116e-05	1.7249				1.84-1.85	0.000186411	1.84445	1.92-1.93	0.000180196	1.9233	1.4-1.41	0.000404122	1.4048	1.43-1.44	0.000564334	1.43449	1.71-1.72	8.25423e-05	1.7182	1.56-1.57	8.93815e-05	1.5636	1.47-1.48	0.000301955
1.97-1.98	0.000116795	1.9797	1.69-1.7	8.8269e-05	1.6932	1.46-1.47	0.000429553	1.46534	1.82-1.83	9.15164e-05	1.8239				1.6-1.61	0.000244419	1.6052	1.73-1.74	0.000169837	1.73485	2.22-2.23	0.000202286	2.22515	1.74-1.75	8.77116e-05	1.7425				1.86-1.87	9.32053e-05	1.8645	1.95-1.96	0.000180196	1.95425	1.41-1.42	0.000404122	1.41415	1.44-1.45	0.000161238	1.4418	1.73-1.74	8.25423e-05	1.7348	1.59-1.6	8.93815e-05	1.5971	1.49-1.5	0.000150978
1.99-2	0.000116795	1.9903	1.7-1.71	8.8269e-05	1.7042	1.47-1.48	0.000171821	1.47645	1.83-1.84	9.15164e-05	1.8376				1.65-1.66	0.000325892	1.65633	1.74-1.75	8.49185e-05	1.7409	2.26-2.27	0.000101143	2.2636	1.75-1.76	0.000175423	1.7566				1.87-1.88	9.32053e-05	1.8789	1.99-2	9.00982e-05	1.9967	1.42-1.43	0.000404122	1.42578	1.45-1.46	8.06192e-05	1.4557	1.75-1.76	8.25423e-05	1.7595	1.6-1.61	8.93815e-05	1.6054	1.5-1.51	7.54888e-05
2.01-2.02	0.000116795	2.0165	1.71-1.72	0.000176538	1.71945	1.48-1.49	0.000171821	1.488	1.84-1.85	0.000274549	1.84677				1.68-1.69	0.000244419	1.6836	1.77-1.78	0.000339674	1.77677	2.35-2.36	0.000101143	2.353	1.77-1.78	0.000263135	1.77247				1.9-1.91	9.32053e-05	1.9026	2.02-2.03	9.00982e-05	2.0265	1.43-1.44	0.000404122	1.43603	1.46-1.47	0.000241857	1.4644	1.77-1.78	8.25423e-05	1.7763	1.61-1.62	0.000178763	1.6188	1.51-1.52	0.000377444
2.09-2.1	0.000116795	2.0923	1.72-1.73	8.8269e-05	1.7202	1.49-1.5	0.000257732	1.49517	1.86-1.87	9.15164e-05	1.8651				1.69-1.7	8.1473e-05	1.6909	1.78-1.79	8.49185e-05	1.782	2.36-2.37	0.000101143	2.364	1.79-1.8	8.77116e-05	1.7932				1.91-1.92	9.32053e-05	1.9167	2.04-2.05	9.00982e-05	2.0499	1.44-1.45	0.000303092	1.44587	1.47-1.48	8.06192e-05	1.4701	1.79-1.8	8.25423e-05	1.7972	1.62-1.63	8.93815e-05	1.6296	1.52-1.53	0.000150978
2.1-2.11	0.00023359	2.10415	1.76-1.77	8.8269e-05	1.7606	1.5-1.51	0.000257732	1.50263	1.88-1.89	9.15164e-05	1.8845				1.7-1.71	8.1473e-05	1.7065	1.79-1.8	0.000339674	1.79585	2.41-2.42	0.000101143	2.4107	1.8-1.81	0.000175423	1.80285				1.93-1.94	9.32053e-05	1.9356	2.07-2.08	9.00982e-05	2.073	1.45-1.46	0.000303092	1.45393	1.48-1.49	0.000241857	1.48663	1.8-1.81	8.25423e-05	1.8077	1.64-1.65	0.000178763	1.6403	1.53-1.54	7.54888e-05
2.12-2.13	0.000116795	2.1259	1.79-1.8	8.8269e-05	1.7995	1.51-1.52	0.000257732	1.5129	1.91-1.92	0.000274549	1.913				1.71-1.72	8.1473e-05	1.7162	1.8-1.81	8.49185e-05	1.8031	2.44-2.45	0.000101143	2.445	1.81-1.82	8.77116e-05	1.8171				1.95-1.96	9.32053e-05	1.9535	2.13-2.14	9.00982e-05	2.1378	1.46-1.47	0.000303092	1.4644	1.49-1.5	8.06192e-05	1.4921	1.81-1.82	8.25423e-05	1.8158	1.66-1.67	8.93815e-05	1.6682	1.54-1.55	0.000150978
2.2-2.21	0.000116795	2.2062	1.8-1.81	0.000176538	1.80435	1.52-1.53	0.000429553	1.52144	1.92-1.93	0.000274549	1.92417				1.72-1.73	8.1473e-05	1.7227	1.82-1.83	8.49185e-05	1.8291	2.46-2.47	0.000202286	2.4677	1.84-1.85	8.77116e-05	1.8426				1.97-1.98	0.000186411	1.9743	2.16-2.17	9.00982e-05	2.1676	1.47-1.48	0.000303092	1.4776	1.5-1.51	0.000322477	1.50368	1.84-1.85	0.000165085	1.84325	1.7-1.71	8.93815e-05	1.7025	1.56-1.57	0.000150978
2.23-2.24	0.000350385	2.23887	1.81-1.82	8.8269e-05	1.8155	1.53-1.54	0.000171821	1.5395	1.93-1.94	0.000183033	1.9376				1.75-1.76	8.1473e-05	1.7524	1.85-1.86	8.49185e-05	1.8594	2.49-2.5	0.000202286	2.4933	1.9-1.91	8.77116e-05	1.9002				1.99-2	0.000186411	1.9915	2.19-2.2	9.00982e-05	2.196	1.48-1.49	0.000101031	1.4895	1.51-1.52	0.000241857	1.5122	1.87-1.88	8.25423e-05	1.8742	1.71-1.72	8.93815e-05	1.7186	1.57-1.58	0.000377444
2.25-2.26	0.000350385	2.2546	1.82-1.83	8.8269e-05	1.8241	1.54-1.55	0.000429553	1.54584	1.95-1.96	9.15164e-05	1.9548				1.78-1.79	8.1473e-05	1.784	1.88-1.89	0.000169837	1.8853	2.56-2.57	0.000101143	2.5663	1.91-1.92	0.000175423	1.9144				2-2.01	0.000186411	2.0052	2.2-2.21	0.000180196	2.20425	1.49-1.5	0.000202061	1.49505	1.52-1.53	0.000161238	1.52125	1.89-1.9	8.25423e-05	1.8932	1.72-1.73	0.000268144	1.7234	1.58-1.59	7.54888e-05
2.27-2.28	0.000116795	2.2705	1.84-1.85	0.000176538	1.8421	1.55-1.56	0.000257732	1.55593	1.97-1.98	9.15164e-05	1.9772				1.8-1.81	0.000162946	1.8046	1.89-1.9	0.000169837	1.8959	2.65-2.66	0.000101143	2.6586	1.93-1.94	8.77116e-05	1.938				2.09-2.1	9.32053e-05	2.096	2.21-2.22	9.00982e-05	2.2175	1.5-1.51	0.000303092	1.50433	1.53-1.54	0.000322477	1.5364	1.9-1.91	0.000165085	1.9037	1.73-1.74	8.93815e-05	1.7332	1.59-1.6	0.000150978
2.31-2.32	0.000116795	2.3192	1.87-1.88	8.8269e-05	1.8784	1.56-1.57	0.000171821	1.56725	1.99-2	9.15164e-05	1.9978				1.82-1.83	8.1473e-05	1.8215	1.9-1.91	0.000169837	1.9031	2.7-2.71	0.000101143	2.7064	1.94-1.95	8.77116e-05	1.9463				2.2-2.21	0.000186411	2.2043	2.25-2.26	9.00982e-05	2.2508	1.51-1.52	0.000303092	1.5141	1.54-1.55	0.000403096	1.5452	1.91-1.92	0.000165085	1.9113	1.76-1.77	0.000268144	1.76643	1.61-1.62	7.54888e-05
2.34-2.35	0.000116795	2.3451	1.88-1.89	8.8269e-05	1.8858	1.57-1.58	0.000171821	1.5762	2.01-2.02	9.15164e-05	2.0153				1.86-1.87	8.1473e-05	1.8644	1.91-1.92	8.49185e-05	1.9168	2.83-2.84	0.000101143	2.837	1.95-1.96	8.77116e-05	1.9563				2.26-2.27	9.32053e-05	2.2671	2.31-2.32	9.00982e-05	2.3182	1.52-1.53	0.000202061	1.5215	1.55-1.56	0.000241857	1.55223	1.94-1.95	8.25423e-05	1.9476	1.77-1.78	8.93815e-05	1.775	1.62-1.63	0.000301955
2.35-2.36	0.00023359	2.3545	1.89-1.9	8.8269e-05	1.8947	1.58-1.59	0.000343643	1.58383	2.04-2.05	9.15164e-05	2.0422				1.9-1.91	8.1473e-05	1.9014	1.92-1.93	0.000169837	1.92415	3.01-3.02	0.000101143	3.0119	1.96-1.97	8.77116e-05	1.9603				2.3-2.31	9.32053e-05	2.3035	2.32-2.33	9.00982e-05	2.3254	1.53-1.54	0.000404122	1.53638	1.56-1.57	8.06192e-05	1.5669	1.98-1.99	0.000165085	1.9837	1.78-1.79	8.93815e-05	1.7801	1.63-1.64	7.54888e-05
2.36-2.37	0.000116795	2.3617	1.9-1.91	8.8269e-05	1.9002	1.59-1.6	8.59107e-05	1.5991	2.11-2.12	9.15164e-05	2.1117				1.92-1.93	8.1473e-05	1.9247	1.93-1.94	0.000169837	1.9352	3.02-3.03	0.000101143	3.0278	1.98-1.99	8.77116e-05	1.9863				2.33-2.34	9.32053e-05	2.3359	2.33-2.34	0.000180196	2.3334	1.54-1.55	0.000505153	1.54286	1.57-1.58	8.06192e-05	1.5744	1.99-2	8.25423e-05	1.9918	1.8-1.81	8.93815e-05	1.8035	1.64-1.65	0.000150978
2.38-2.39	0.000116795	2.3803	1.92-1.93	8.8269e-05	1.9201	1.6-1.61	8.59107e-05	1.6017	2.14-2.15	9.15164e-05	2.1447				1.94-1.95	8.1473e-05	1.9431	1.94-1.95	8.49185e-05	1.9409	3.49-3.5	0.000101143	3.4962	2.02-2.03	0.000350846	2.02718				2.37-2.38	9.32053e-05	2.3785	2.42-2.43	0.000180196	2.4212	1.55-1.56	0.000101031	1.5547	1.58-1.59	8.06192e-05	1.5877	2.02-2.03	0.000165085	2.021	1.84-1.85	8.93815e-05	1.8432	1.66-1.67	7.54888e-05
2.45-2.46	0.000116795	2.4593	1.93-1.94	0.000176538	1.93525	1.61-1.62	8.59107e-05	1.614	2.17-2.18	9.15164e-05	2.1797				1.95-1.96	8.1473e-05	1.952	1.96-1.97	0.000254755	1.96503				2.15-2.16	0.000350846	2.15583				2.41-2.42	9.32053e-05	2.4172	2.45-2.46	9.00982e-05	2.4526	1.56-1.57	0.000202061	1.5658	1.59-1.6	0.000241857	1.5943	2.03-2.04	0.000165085	2.03675	1.85-1.86	0.000268144	1.85337	1.67-1.68	0.000150978
2.47-2.48	0.00023359	2.47525	1.95-1.96	8.8269e-05	1.9557	1.65-1.66	0.000171821	1.6588	2.19-2.2	0.000183033	2.1986				1.98-1.99	0.000162946	1.98275	1.98-1.99	8.49185e-05	1.9848				2.16-2.17	0.000175423	2.16665				2.42-2.43	9.32053e-05	2.4215	2.47-2.48	9.00982e-05	2.4709	1.58-1.59	0.000404122	1.58428	1.6-1.61	0.000161238	1.6056	2.15-2.16	8.25423e-05	2.1519	1.87-1.88	8.93815e-05	1.8742	1.68-1.69	7.54888e-05
2.52-2.53	0.00023359	2.52465	1.96-1.97	8.8269e-05	1.9685	1.66-1.67	0.000171821	1.66495	2.2-2.21	9.15164e-05	2.2048				1.99-2	8.1473e-05	1.9922	2-2.01	8.49185e-05	2.0016				2.2-2.21	8.77116e-05	2.206				2.49-2.5	0.000186411	2.4945	2.48-2.49	0.000270295	2.48253	1.59-1.6	0.000303092	1.5953	1.61-1.62	0.000161238	1.61645	2.16-2.17	8.25423e-05	2.1606	1.89-1.9	8.93815e-05	1.8964	1.7-1.71	7.54888e-05
2.57-2.58	0.00023359	2.57395	2-2.01	8.8269e-05	2.0011	1.67-1.68	0.000171821	1.6744	2.21-2.22	9.15164e-05	2.2158				2-2.01	8.1473e-05	2.0079	2.01-2.02	0.000169837	2.0148				2.22-2.23	8.77116e-05	2.2207				2.5-2.51	0.000186411	2.50565	2.49-2.5	0.000180196	2.4981	1.6-1.61	0.000505153	1.60352	1.62-1.63	8.06192e-05	1.6211	2.18-2.19	8.25423e-05	2.1882	1.9-1.91	8.93815e-05	1.9031	1.72-1.73	7.54888e-05
2.61-2.62	0.000116795	2.6129	2.01-2.02	8.8269e-05	2.0174	1.68-1.69	8.59107e-05	1.6844	2.22-2.23	0.000183033	2.2238				2.01-2.02	8.1473e-05	2.0114	2.02-2.03	8.49185e-05	2.0264				2.25-2.26	8.77116e-05	2.2505				2.51-2.52	9.32053e-05	2.518	2.5-2.51	0.000360393	2.5029	1.61-1.62	0.000202061	1.6165	1.63-1.64	0.000403096	1.6353	2.26-2.27	0.000165085	2.2659	1.91-1.92	8.93815e-05	1.9142	1.74-1.75	7.54888e-05
2.65-2.66	0.000116795	2.6596	2.04-2.05	8.8269e-05	2.0402	1.69-1.7	8.59107e-05	1.6914	2.23-2.24	9.15164e-05	2.239				2.02-2.03	0.000162946	2.0255	2.04-2.05	8.49185e-05	2.0482				2.31-2.32	0.000263135	2.31583				2.54-2.55	9.32053e-05	2.5469	2.51-2.52	9.00982e-05	2.5185	1.62-1.63	0.000404122	1.62548	1.64-1.65	8.06192e-05	1.6408	2.28-2.29	8.25423e-05	2.2811	1.93-1.94	0.000178763	1.9391	1.75-1.76	7.54888e-05
2.67-2.68	0.000116795	2.6734	2.06-2.07	0.000176538	2.0665	1.7-1.71	8.59107e-05	1.7002	2.27-2.28	9.15164e-05	2.2774				2.1-2.11	0.000162946	2.1022	2.09-2.1	0.000169837	2.09385				2.33-2.34	8.77116e-05	2.3324				2.55-2.56	9.32053e-05	2.5586	2.52-2.53	9.00982e-05	2.5208	1.63-1.64	0.000404122	1.63803	1.65-1.66	8.06192e-05	1.6594	2.3-2.31	8.25423e-05	2.3047	1.94-1.95	0.000268144	1.94323	1.76-1.77	0.000150978
2.68-2.69	0.000116795	2.6816	2.07-2.08	8.8269e-05	2.0716	1.71-1.72	0.000171821	1.71525	2.29-2.3	9.15164e-05	2.2973				2.13-2.14	0.000162946	2.1322	2.12-2.13	8.49185e-05	2.1228				2.36-2.37	8.77116e-05	2.3636				2.57-2.58	9.32053e-05	2.572	2.56-2.57	0.000180196	2.5667	1.64-1.65	0.000303092	1.6434	1.66-1.67	0.000322477	1.66447	2.32-2.33	0.000165085	2.3255	1.96-1.97	0.000178763	1.96555	1.8-1.81	0.000150978
2.8-2.81	0.000116795	2.8015	2.08-2.09	8.8269e-05	2.0809	1.72-1.73	0.000171821	1.7272	2.3-2.31	9.15164e-05	2.309				2.17-2.18	0.000325892	2.17548	2.13-2.14	8.49185e-05	2.133				2.42-2.43	0.000263135	2.426				2.58-2.59	9.32053e-05	2.5833	2.57-2.58	9.00982e-05	2.5721	1.65-1.66	0.000202061	1.6582	1.67-1.68	8.06192e-05	1.6777	2.33-2.34	8.25423e-05	2.3387	1.97-1.98	8.93815e-05	1.9703	1.82-1.83	0.000150978
2.81-2.82	0.000116795	2.8176	2.1-2.11	0.000176538	2.10445	1.75-1.76	0.000257732	1.75467	2.33-2.34	9.15164e-05	2.3349				2.18-2.19	8.1473e-05	2.1862	2.14-2.15	0.000254755	2.1452				2.44-2.45	8.77116e-05	2.4467				2.59-2.6	9.32053e-05	2.5907	2.62-2.63	0.000180196	2.62755	1.66-1.67	0.000808244	1.66603	1.68-1.69	0.000241857	1.68617	2.34-2.35	8.25423e-05	2.341	2-2.01	0.000178763	2.0022	1.83-1.84	0.000150978
2.82-2.83	0.000116795	2.8257	2.13-2.14	0.000176538	2.1316	1.76-1.77	0.000171821	1.76185	2.34-2.35	0.000183033	2.3491				2.2-2.21	8.1473e-05	2.2052	2.15-2.16	8.49185e-05	2.1584				2.47-2.48	8.77116e-05	2.4745				2.6-2.61	9.32053e-05	2.6041	2.66-2.67	9.00982e-05	2.6675	1.67-1.68	0.000101031	1.6799	1.7-1.71	0.000161238	1.70415	2.38-2.39	8.25423e-05	2.3803	2.01-2.02	8.93815e-05	2.01	1.85-1.86	7.54888e-05
2.83-2.84	0.000116795	2.8392	2.15-2.16	8.8269e-05	2.1585	1.77-1.78	0.000171821	1.7727	2.36-2.37	9.15164e-05	2.3602				2.22-2.23	8.1473e-05	2.2204	2.16-2.17	8.49185e-05	2.1622				2.54-2.55	0.000175423	2.5473				2.62-2.63	9.32053e-05	2.6211	2.67-2.68	9.00982e-05	2.6718	1.69-1.7	0.000202061	1.69575	1.71-1.72	0.000322477	1.7127	2.39-2.4	8.25423e-05	2.3909	2.03-2.04	8.93815e-05	2.031	1.87-1.88	0.000150978
3.2-3.21	0.000116795	3.2014	2.16-2.17	0.000264807	2.16393	1.79-1.8	8.59107e-05	1.7992	2.38-2.39	0.000274549	2.38253				2.25-2.26	0.000162946	2.2568	2.18-2.19	0.000169837	2.182				2.55-2.56	8.77116e-05	2.5505				2.64-2.65	9.32053e-05	2.6455	2.69-2.7	9.00982e-05	2.6918	1.7-1.71	0.000202061	1.70185	1.73-1.74	0.000322477	1.73752	2.44-2.45	8.25423e-05	2.4439	2.05-2.06	8.93815e-05	2.0553	1.88-1.89	0.000150978
3.22-3.23	0.000116795	3.2206	2.18-2.19	0.000264807	2.18747	1.81-1.82	0.000171821	1.8136	2.4-2.41	9.15164e-05	2.4037				2.26-2.27	8.1473e-05	2.2626	2.2-2.21	8.49185e-05	2.2054				2.65-2.66	8.77116e-05	2.6548				2.67-2.68	9.32053e-05	2.6742	2.74-2.75	9.00982e-05	2.7425	1.71-1.72	0.000202061	1.7147	1.78-1.79	0.000322477	1.7848	2.45-2.46	8.25423e-05	2.4585	2.08-2.09	8.93815e-05	2.0864	1.89-1.9	7.54888e-05
3.23-3.24	0.000116795	3.2353	2.21-2.22	8.8269e-05	2.2118	1.82-1.83	8.59107e-05	1.8284	2.41-2.42	0.000274549	2.41617				2.28-2.29	8.1473e-05	2.2897	2.22-2.23	0.000424592	2.22444				2.67-2.68	0.000175423	2.6754				2.69-2.7	0.000186411	2.69845	2.75-2.76	9.00982e-05	2.754	1.73-1.74	0.000101031	1.738	1.79-1.8	8.06192e-05	1.7978	2.46-2.47	8.25423e-05	2.4617	2.09-2.1	8.93815e-05	2.099	1.91-1.92	7.54888e-05
3.92-3.93	0.000116795	3.9257	2.22-2.23	8.8269e-05	2.2256	1.83-1.84	0.000257732	1.83517	2.45-2.46	9.15164e-05	2.4575				2.3-2.31	8.1473e-05	2.3088	2.23-2.24	8.49185e-05	2.2391				2.68-2.69	8.77116e-05	2.6807				2.73-2.74	9.32053e-05	2.7357	2.79-2.8	0.000270295	2.79503	1.74-1.75	0.000303092	1.7427	1.81-1.82	8.06192e-05	1.8173	2.48-2.49	0.000247627	2.48357	2.1-2.11	0.000178763	2.1042	1.92-1.93	7.54888e-05
			2.23-2.24	8.8269e-05	2.2367	1.84-1.85	0.000257732	1.84503	2.47-2.48	9.15164e-05	2.473				2.32-2.33	0.000162946	2.3217	2.27-2.28	0.000169837	2.275				2.71-2.72	8.77116e-05	2.7108				2.74-2.75	0.000186411	2.744	2.81-2.82	9.00982e-05	2.8133	1.75-1.76	0.000101031	1.7574	1.83-1.84	8.06192e-05	1.8337	2.5-2.51	0.000165085	2.50155	2.12-2.13	8.93815e-05	2.1287	2-2.01	0.000150978
			2.26-2.27	8.8269e-05	2.2639	1.85-1.86	8.59107e-05	1.856	2.5-2.51	0.000183033	2.5078				2.33-2.34	8.1473e-05	2.3344	2.29-2.3	8.49185e-05	2.295				2.72-2.73	8.77116e-05	2.7203				2.75-2.76	9.32053e-05	2.7526	2.84-2.85	9.00982e-05	2.8453	1.76-1.77	0.000303092	1.76483	1.84-1.85	0.000241857	1.847	2.53-2.54	8.25423e-05	2.5391	2.15-2.16	8.93815e-05	2.1503	2.01-2.02	7.54888e-05
			2.3-2.31	8.8269e-05	2.3085	1.86-1.87	8.59107e-05	1.8678	2.52-2.53	9.15164e-05	2.5215				2.35-2.36	8.1473e-05	2.3505	2.36-2.37	0.000169837	2.36285				2.74-2.75	8.77116e-05	2.7455				2.76-2.77	9.32053e-05	2.7689	2.9-2.91	9.00982e-05	2.9063	1.77-1.78	0.000202061	1.77395	1.86-1.87	0.000161238	1.8649	2.55-2.56	8.25423e-05	2.5587	2.16-2.17	0.000178763	2.1665	2.02-2.03	0.000226466
			2.34-2.35	8.8269e-05	2.3478	1.87-1.88	0.000171821	1.87865	2.56-2.57	9.15164e-05	2.5618				2.36-2.37	8.1473e-05	2.3612	2.37-2.38	8.49185e-05	2.378				2.76-2.77	8.77116e-05	2.7682				2.79-2.8	9.32053e-05	2.7911	2.95-2.96	9.00982e-05	2.9576	1.78-1.79	0.000101031	1.7872	1.87-1.88	0.000161238	1.87585	2.56-2.57	8.25423e-05	2.5686	2.19-2.2	8.93815e-05	2.1903	2.03-2.04	7.54888e-05
			2.36-2.37	0.000264807	2.36487	1.88-1.89	0.000171821	1.8881	2.57-2.58	9.15164e-05	2.575				2.37-2.38	0.000244419	2.3732	2.38-2.39	0.000254755	2.38623				2.78-2.79	8.77116e-05	2.7897				2.81-2.82	9.32053e-05	2.8166	2.96-2.97	9.00982e-05	2.9663	1.79-1.8	0.000202061	1.797	1.89-1.9	8.06192e-05	1.8998	2.59-2.6	0.000165085	2.5967	2.21-2.22	8.93815e-05	2.216	2.05-2.06	0.000150978
			2.37-2.38	0.000176538	2.3755	1.89-1.9	0.000343643	1.8955	2.6-2.61	9.15164e-05	2.6094				2.39-2.4	8.1473e-05	2.3903	2.42-2.43	8.49185e-05	2.429				2.83-2.84	8.77116e-05	2.8368				2.85-2.86	9.32053e-05	2.8559	3.01-3.02	9.00982e-05	3.0165	1.82-1.83	0.000101031	1.8208	1.9-1.91	8.06192e-05	1.9038	2.69-2.7	8.25423e-05	2.6902	2.26-2.27	8.93815e-05	2.264	2.07-2.08	7.54888e-05
			2.41-2.42	8.8269e-05	2.4122	1.9-1.91	0.000171821	1.90415	2.62-2.63	9.15164e-05	2.6252				2.4-2.41	0.000162946	2.40235	2.44-2.45	8.49185e-05	2.4453				2.85-2.86	8.77116e-05	2.8531				2.87-2.88	9.32053e-05	2.8771	3.19-3.2	0.000180196	3.1937	1.84-1.85	0.000202061	1.84355	1.91-1.92	0.000161238	1.9167	2.7-2.71	8.25423e-05	2.7007	2.3-2.31	8.93815e-05	2.3043	2.09-2.1	0.000150978
			2.43-2.44	8.8269e-05	2.431	1.91-1.92	0.000171821	1.912	2.63-2.64	9.15164e-05	2.6395				2.42-2.43	8.1473e-05	2.4298	2.46-2.47	8.49185e-05	2.4602				2.87-2.88	8.77116e-05	2.8738				3.05-3.06	9.32053e-05	3.052	3.2-3.21	9.00982e-05	3.2042	1.85-1.86	0.000303092	1.8548	1.93-1.94	8.06192e-05	1.9355	2.72-2.73	8.25423e-05	2.727	2.32-2.33	8.93815e-05	2.326	2.12-2.13	7.54888e-05
			2.46-2.47	8.8269e-05	2.465	1.93-1.94	8.59107e-05	1.9392	2.64-2.65	9.15164e-05	2.6454				2.43-2.44	8.1473e-05	2.4354	2.48-2.49	8.49185e-05	2.4846				2.91-2.92	8.77116e-05	2.9167				3.21-3.22	9.32053e-05	3.2105	3.22-3.23	9.00982e-05	3.2294	1.86-1.87	0.000303092	1.8649	1.94-1.95	0.000161238	1.94255	2.73-2.74	8.25423e-05	2.7384	2.34-2.35	0.000178763	2.3488	2.13-2.14	7.54888e-05
			2.47-2.48	0.000264807	2.4774	1.95-1.96	8.59107e-05	1.9588	2.67-2.68	0.000183033	2.6705				2.44-2.45	8.1473e-05	2.4494	2.5-2.51	0.000169837	2.50675				2.95-2.96	8.77116e-05	2.9553				3.25-3.26	9.32053e-05	3.2577	3.71-3.72	9.00982e-05	3.7142	1.87-1.88	0.000202061	1.87265	1.96-1.97	0.000161238	1.96325	2.76-2.77	0.000165085	2.7661	2.35-2.36	8.93815e-05	2.3598	2.18-2.19	7.54888e-05
			2.49-2.5	0.000176538	2.49765	1.97-1.98	8.59107e-05	1.9726	2.68-2.69	9.15164e-05	2.6807				2.45-2.46	8.1473e-05	2.455	2.51-2.52	8.49185e-05	2.5175				2.98-2.99	8.77116e-05	2.9815				3.26-3.27	9.32053e-05	3.2658	4.19-4.2	9.00982e-05	4.1919	1.88-1.89	0.000101031	1.8809	2-2.01	0.000241857	2.00537	2.78-2.79	0.000247627	2.78907	2.42-2.43	8.93815e-05	2.4229	2.19-2.2	7.54888e-05
			2.5-2.51	8.8269e-05	2.5098	1.98-1.99	8.59107e-05	1.9804	2.69-2.7	9.15164e-05	2.6913				2.46-2.47	8.1473e-05	2.4641	2.52-2.53	8.49185e-05	2.5248				3.02-3.03	8.77116e-05	3.0247				3.28-3.29	9.32053e-05	3.2864	4.89-4.9	9.00982e-05	4.8964	1.89-1.9	0.000202061	1.89485	2.01-2.02	8.06192e-05	2.0175	2.79-2.8	0.000165085	2.7972	2.43-2.44	8.93815e-05	2.4329	2.21-2.22	7.54888e-05
			2.51-2.52	8.8269e-05	2.5162	1.99-2	0.000171821	1.9941	2.74-2.75	9.15164e-05	2.7474				2.48-2.49	8.1473e-05	2.4859	2.53-2.54	0.000169837	2.5389				3.1-3.11	0.000175423	3.10535				3.48-3.49	9.32053e-05	3.487				1.9-1.91	0.000303092	1.90597	2.03-2.04	8.06192e-05	2.0312	2.82-2.83	8.25423e-05	2.8273	2.44-2.45	8.93815e-05	2.4452	2.22-2.23	0.000150978
			2.53-2.54	0.000176538	2.53235	2.03-2.04	8.59107e-05	2.0377	2.79-2.8	0.000183033	2.79945				2.5-2.51	8.1473e-05	2.5052	2.54-2.55	8.49185e-05	2.5466				3.19-3.2	8.77116e-05	3.1952										1.91-1.92	0.000202061	1.91415	2.05-2.06	8.06192e-05	2.0561	2.87-2.88	8.25423e-05	2.8774	2.46-2.47	8.93815e-05	2.4628	2.23-2.24	7.54888e-05
			2.55-2.56	0.000176538	2.55495	2.04-2.05	8.59107e-05	2.0479	2.8-2.81	9.15164e-05	2.8065				2.52-2.53	8.1473e-05	2.523	2.55-2.56	0.000169837	2.5599				3.25-3.26	8.77116e-05	3.2511										1.92-1.93	0.000101031	1.9257	2.1-2.11	8.06192e-05	2.1073	2.89-2.9	8.25423e-05	2.8958	2.51-2.52	0.000178763	2.51375	2.25-2.26	7.54888e-05
			2.56-2.57	8.8269e-05	2.564	2.05-2.06	0.000257732	2.05547	2.81-2.82	9.15164e-05	2.8197				2.53-2.54	8.1473e-05	2.5323	2.58-2.59	0.000169837	2.5858				3.3-3.31	8.77116e-05	3.3099										1.93-1.94	0.000202061	1.9339	2.12-2.13	0.000322477	2.12538	2.92-2.93	8.25423e-05	2.9223	2.52-2.53	8.93815e-05	2.5221	2.28-2.29	7.54888e-05
			2.59-2.6	8.8269e-05	2.5985	2.06-2.07	8.59107e-05	2.0603	2.89-2.9	9.15164e-05	2.8964				2.58-2.59	8.1473e-05	2.581	2.59-2.6	0.000169837	2.5957				3.41-3.42	8.77116e-05	3.4136										1.94-1.95	0.000101031	1.9438	2.14-2.15	8.06192e-05	2.1404	2.99-3	8.25423e-05	2.9948	2.53-2.54	0.000268144	2.5355	2.31-2.32	0.000150978
			2.6-2.61	8.8269e-05	2.6069	2.08-2.09	8.59107e-05	2.0876	2.9-2.91	9.15164e-05	2.9001				2.61-2.62	8.1473e-05	2.6108	2.6-2.61	0.000169837	2.6059				3.64-3.65	0.000175423	3.64365										1.95-1.96	0.000303092	1.95193	2.16-2.17	0.000161238	2.1654	3.01-3.02	0.000247627	3.0145	2.58-2.59	0.000178763	2.5875	2.33-2.34	7.54888e-05
			2.62-2.63	8.8269e-05	2.626	2.1-2.11	8.59107e-05	2.1014	2.94-2.95	9.15164e-05	2.9442				2.64-2.65	0.000162946	2.64555	2.61-2.62	0.000169837	2.6163				4.29-4.3	8.77116e-05	4.2995										1.96-1.97	0.000202061	1.96695	2.18-2.19	8.06192e-05	2.18	3.07-3.08	8.25423e-05	3.0761	2.61-2.62	8.93815e-05	2.6188	2.35-2.36	7.54888e-05
			2.63-2.64	0.000176538	2.63275	2.11-2.12	8.59107e-05	2.11	2.96-2.97	0.000457582	2.96428				2.66-2.67	8.1473e-05	2.6649	2.62-2.63	8.49185e-05	2.6207																1.97-1.98	0.000101031	1.9782	2.19-2.2	0.000241857	2.19333	3.19-3.2	8.25423e-05	3.1934	2.62-2.63	8.93815e-05	2.6236	2.37-2.38	0.000226466
			2.66-2.67	8.8269e-05	2.6692	2.12-2.13	0.000343643	2.12407	2.97-2.98	0.000183033	2.9758				2.7-2.71	8.1473e-05	2.7075	2.63-2.64	8.49185e-05	2.6351																1.98-1.99	0.000505153	1.98668	2.21-2.22	0.000241857	2.2131	3.2-3.21	8.25423e-05	3.2058	2.63-2.64	8.93815e-05	2.6326	2.39-2.4	7.54888e-05
			2.68-2.69	0.000176538	2.6839	2.13-2.14	8.59107e-05	2.1338	3.02-3.03	9.15164e-05	3.0285				2.77-2.78	8.1473e-05	2.7705	2.64-2.65	8.49185e-05	2.6401																1.99-2	0.000101031	1.9925	2.22-2.23	8.06192e-05	2.2211	3.23-3.24	8.25423e-05	3.2355	2.7-2.71	0.000178763	2.70625	2.4-2.41	7.54888e-05
			2.69-2.7	0.000176538	2.69115	2.14-2.15	0.000343643	2.14395	3.22-3.23	9.15164e-05	3.2224				2.85-2.86	0.000162946	2.8533	2.67-2.68	8.49185e-05	2.6728																2-2.01	0.000404122	2.00637	2.24-2.25	0.000161238	2.24495	3.32-3.33	8.25423e-05	3.3252	2.74-2.75	8.93815e-05	2.7445	2.41-2.42	7.54888e-05
			2.7-2.71	0.000176538	2.7021	2.15-2.16	8.59107e-05	2.1543	3.42-3.43	9.15164e-05	3.4232				3.04-3.05	8.1473e-05	3.0427	2.68-2.69	8.49185e-05	2.6892																2.01-2.02	0.000101031	2.0193	2.25-2.26	8.06192e-05	2.2591	3.5-3.51	8.25423e-05	3.5014	2.75-2.76	8.93815e-05	2.7561	2.43-2.44	7.54888e-05
			2.73-2.74	8.8269e-05	2.7399	2.17-2.18	8.59107e-05	2.1778	4.19-4.2	9.15164e-05	4.1978				3.16-3.17	8.1473e-05	3.1619	2.7-2.71	0.000169837	2.7085																2.02-2.03	0.000202061	2.02425	2.26-2.27	8.06192e-05	2.2607	3.85-3.86	8.25423e-05	3.8573	2.76-2.77	8.93815e-05	2.7692	2.44-2.45	7.54888e-05
			2.76-2.77	8.8269e-05	2.7692	2.19-2.2	8.59107e-05	2.1915	4.97-4.98	9.15164e-05	4.9707				3.39-3.4	8.1473e-05	3.3955	2.71-2.72	8.49185e-05	2.7125																2.05-2.06	0.000101031	2.0506	2.27-2.28	8.06192e-05	2.2744				2.77-2.78	0.000178763	2.77285	2.48-2.49	7.54888e-05
			2.77-2.78	8.8269e-05	2.7763	2.2-2.21	8.59107e-05	2.2059							3.61-3.62	0.000325892	3.6147	2.73-2.74	8.49185e-05	2.7362																2.06-2.07	0.000101031	2.0669	2.3-2.31	8.06192e-05	2.3077				2.78-2.79	8.93815e-05	2.7808	2.5-2.51	7.54888e-05
			2.78-2.79	8.8269e-05	2.7841	2.23-2.24	8.59107e-05	2.238							4.1-4.11	8.1473e-05	4.1039	2.75-2.76	8.49185e-05	2.7526																2.08-2.09	0.000101031	2.0836	2.33-2.34	0.000403096	2.33476				2.82-2.83	8.93815e-05	2.8244	2.53-2.54	0.000150978
			2.79-2.8	8.8269e-05	2.7932	2.24-2.25	8.59107e-05	2.2429										2.78-2.79	8.49185e-05	2.781																2.09-2.1	0.000101031	2.0968	2.34-2.35	0.000161238	2.34425				2.85-2.86	0.000268144	2.85603	2.54-2.55	0.000150978
			2.82-2.83	8.8269e-05	2.8202	2.26-2.27	8.59107e-05	2.2602										2.82-2.83	8.49185e-05	2.8286																2.1-2.11	0.000101031	2.1084	2.35-2.36	0.000161238	2.3555				2.88-2.89	8.93815e-05	2.8825	2.55-2.56	7.54888e-05
			2.83-2.84	8.8269e-05	2.8361	2.27-2.28	8.59107e-05	2.2721										2.83-2.84	8.49185e-05	2.8398																2.11-2.12	0.000202061	2.1139	2.36-2.37	8.06192e-05	2.3623				2.9-2.91	8.93815e-05	2.9035	2.56-2.57	7.54888e-05
			2.94-2.95	8.8269e-05	2.9476	2.28-2.29	0.000171821	2.28155										2.87-2.88	0.000169837	2.87715																2.12-2.13	0.000101031	2.1291	2.38-2.39	8.06192e-05	2.3868				2.96-2.97	8.93815e-05	2.9648	2.57-2.58	7.54888e-05
			2.96-2.97	8.8269e-05	2.9666	2.3-2.31	0.000257732	2.3064										2.9-2.91	8.49185e-05	2.9003																2.13-2.14	0.000101031	2.1327	2.41-2.42	8.06192e-05	2.4173				2.98-2.99	8.93815e-05	2.9813	2.59-2.6	7.54888e-05
			2.99-3	8.8269e-05	2.9992	2.32-2.33	0.000171821	2.3265										3.02-3.03	8.49185e-05	3.0265																2.16-2.17	0.000303092	2.16637	2.42-2.43	0.000241857	2.42303				3-3.01	8.93815e-05	3.0023	2.63-2.64	7.54888e-05
			3.02-3.03	8.8269e-05	3.0254	2.33-2.34	8.59107e-05	2.3331										3.04-3.05	8.49185e-05	3.0402																2.17-2.18	0.000303092	2.1739	2.43-2.44	8.06192e-05	2.4324				3.05-3.06	8.93815e-05	3.0521	2.72-2.73	7.54888e-05
			3.04-3.05	8.8269e-05	3.0452	2.34-2.35	0.000171821	2.3452										3.07-3.08	8.49185e-05	3.0779																2.18-2.19	0.000303092	2.1847	2.45-2.46	0.000161238	2.4531				3.15-3.16	8.93815e-05	3.1555	2.76-2.77	7.54888e-05
			3.06-3.07	8.8269e-05	3.0608	2.36-2.37	8.59107e-05	2.3655										3.08-3.09	8.49185e-05	3.0855																2.2-2.21	0.000202061	2.2071	2.48-2.49	0.000161238	2.4845				3.19-3.2	8.93815e-05	3.1959	2.77-2.78	7.54888e-05
			3.08-3.09	0.000176538	3.08505	2.37-2.38	8.59107e-05	2.3751										3.17-3.18	8.49185e-05	3.1796																2.21-2.22	0.000101031	2.2118	2.49-2.5	8.06192e-05	2.4986				3.21-3.22	8.93815e-05	3.2198	2.8-2.81	7.54888e-05
			3.48-3.49	8.8269e-05	3.486	2.39-2.4	8.59107e-05	2.3971										3.19-3.2	8.49185e-05	3.1914																2.22-2.23	0.000202061	2.22305	2.5-2.51	8.06192e-05	2.5074				3.25-3.26	0.000178763	3.2512	2.83-2.84	7.54888e-05
			3.55-3.56	8.8269e-05	3.5517	2.4-2.41	8.59107e-05	2.4059										3.22-3.23	8.49185e-05	3.2258																2.23-2.24	0.000101031	2.2301	2.53-2.54	0.000161238	2.5309				3.33-3.34	8.93815e-05	3.3382	2.86-2.87	7.54888e-05
			3.59-3.6	8.8269e-05	3.5959	2.42-2.43	8.59107e-05	2.4264										3.24-3.25	0.000169837	3.24775																2.24-2.25	0.000202061	2.24515	2.54-2.55	8.06192e-05	2.5457				3.35-3.36	8.93815e-05	3.358	2.87-2.88	7.54888e-05
			3.62-3.63	8.8269e-05	3.6276	2.44-2.45	0.000171821	2.44795										3.38-3.39	8.49185e-05	3.3823																2.26-2.27	0.000202061	2.2612	2.55-2.56	8.06192e-05	2.558				3.5-3.51	8.93815e-05	3.5066	2.88-2.89	0.000150978
			3.81-3.82	8.8269e-05	3.8168	2.45-2.46	8.59107e-05	2.4527										3.6-3.61	8.49185e-05	3.6058																2.28-2.29	0.000202061	2.2834	2.56-2.57	8.06192e-05	2.563				3.71-3.72	8.93815e-05	3.7149	2.89-2.9	7.54888e-05
			3.87-3.88	8.8269e-05	3.8765	2.46-2.47	0.000171821	2.4644										3.67-3.68	0.000169837	3.6741																2.29-2.3	0.000303092	2.29717	2.57-2.58	0.000322477	2.57698				3.97-3.98	8.93815e-05	3.9762	2.9-2.91	0.000150978
			4.09-4.1	8.8269e-05	4.0927	2.47-2.48	8.59107e-05	2.4727										4.09-4.1	8.49185e-05	4.0955																2.3-2.31	0.000101031	2.3042	2.58-2.59	8.06192e-05	2.5821				4.03-4.04	8.93815e-05	4.0352	2.97-2.98	7.54888e-05
						2.48-2.49	0.000343643	2.48117																												2.31-2.32	0.000202061	2.3147	2.59-2.6	8.06192e-05	2.5967				4.39-4.4	8.93815e-05	4.3923	2.99-3	7.54888e-05
						2.49-2.5	0.000257732	2.49257																												2.32-2.33	0.000101031	2.3247	2.6-2.61	8.06192e-05	2.604							3.05-3.06	7.54888e-05
						2.5-2.51	0.000343643	2.50628																												2.33-2.34	0.000303092	2.33517	2.61-2.62	8.06192e-05	2.6148							3.06-3.07	7.54888e-05
						2.51-2.52	8.59107e-05	2.5175																												2.36-2.37	0.000202061	2.36275	2.62-2.63	0.000161238	2.6255							3.08-3.09	7.54888e-05
						2.53-2.54	8.59107e-05	2.5326																												2.37-2.38	0.000505153	2.37488	2.63-2.64	8.06192e-05	2.6392							3.12-3.13	7.54888e-05
						2.54-2.55	8.59107e-05	2.5496																												2.38-2.39	0.000404122	2.38575	2.64-2.65	8.06192e-05	2.6431							3.16-3.17	7.54888e-05
						2.55-2.56	8.59107e-05	2.5577																												2.39-2.4	0.000202061	2.39305	2.65-2.66	8.06192e-05	2.6575							3.17-3.18	7.54888e-05
						2.57-2.58	0.000171821	2.57165																												2.4-2.41	0.000404122	2.40713	2.66-2.67	0.000161238	2.66105							3.22-3.23	7.54888e-05
						2.58-2.59	8.59107e-05	2.5896																												2.41-2.42	0.000101031	2.4171	2.67-2.68	8.06192e-05	2.6722							3.37-3.38	7.54888e-05
						2.59-2.6	0.000171821	2.5948																												2.42-2.43	0.000101031	2.4235	2.68-2.69	8.06192e-05	2.6884							3.46-3.47	7.54888e-05
						2.61-2.62	0.000171821	2.61575																												2.44-2.45	0.000101031	2.4459	2.7-2.71	8.06192e-05	2.7099							3.49-3.5	7.54888e-05
						2.62-2.63	0.000171821	2.6272																												2.45-2.46	0.000101031	2.4569	2.71-2.72	8.06192e-05	2.7132							3.55-3.56	7.54888e-05
						2.63-2.64	8.59107e-05	2.6312																												2.46-2.47	0.000202061	2.46945	2.72-2.73	0.000161238	2.72115							3.6-3.61	0.000150978
						2.65-2.66	8.59107e-05	2.6539																												2.47-2.48	0.000101031	2.476	2.73-2.74	0.000241857	2.73487							4.05-4.06	7.54888e-05
						2.67-2.68	8.59107e-05	2.6767																												2.48-2.49	0.000101031	2.4802	2.75-2.76	8.06192e-05	2.7583							4.15-4.16	7.54888e-05
						2.71-2.72	0.000171821	2.71555																												2.49-2.5	0.000202061	2.4982	2.77-2.78	8.06192e-05	2.7754							4.7-4.71	7.54888e-05
						2.72-2.73	8.59107e-05	2.7228																												2.5-2.51	0.000303092	2.50533	2.8-2.81	8.06192e-05	2.8087							>5	7.54888e-05
						2.73-2.74	0.000257732	2.7362																												2.51-2.52	0.000303092	2.5154	2.81-2.82	8.06192e-05	2.8125
						2.75-2.76	8.59107e-05	2.7531																												2.52-2.53	0.000101031	2.5231	2.82-2.83	8.06192e-05	2.8211
						2.77-2.78	8.59107e-05	2.7701																												2.53-2.54	0.000404122	2.53463	2.85-2.86	8.06192e-05	2.8579
						2.78-2.79	8.59107e-05	2.7821																												2.54-2.55	0.000101031	2.5453	2.86-2.87	0.000161238	2.86185
						2.79-2.8	8.59107e-05	2.7941																												2.58-2.59	0.000101031	2.5827	2.9-2.91	8.06192e-05	2.9032
						2.8-2.81	8.59107e-05	2.8013																												2.59-2.6	0.000303092	2.59493	2.92-2.93	8.06192e-05	2.9299
						2.81-2.82	0.000171821	2.81355																												2.6-2.61	0.000101031	2.6055	2.93-2.94	0.000161238	2.9346
						2.82-2.83	0.000171821	2.82225																												2.61-2.62	0.000202061	2.6176	2.96-2.97	8.06192e-05	2.9636
						2.84-2.85	0.000171821	2.84315																												2.62-2.63	0.000101031	2.6264	2.97-2.98	8.06192e-05	2.976
						2.85-2.86	0.000257732	2.85567																												2.66-2.67	0.000303092	2.66727	2.98-2.99	8.06192e-05	2.9887
						2.86-2.87	8.59107e-05	2.8652																												2.67-2.68	0.000101031	2.6759	2.99-3	0.000161238	2.9924
						2.88-2.89	0.000171821	2.88495																												2.68-2.69	0.000202061	2.68385	3.02-3.03	8.06192e-05	3.0288
						2.9-2.91	0.000171821	2.90325																												2.69-2.7	0.000202061	2.69415	3.04-3.05	8.06192e-05	3.0408
						2.92-2.93	0.000257732	2.92703																												2.7-2.71	0.000101031	2.7089	3.07-3.08	8.06192e-05	3.0779
						2.93-2.94	0.000171821	2.93425																												2.71-2.72	0.000101031	2.7169	3.08-3.09	0.000161238	3.0879
						2.94-2.95	0.000343643	2.9447																												2.72-2.73	0.000202061	2.7227	3.12-3.13	8.06192e-05	3.1295
						2.95-2.96	0.000171821	2.95505																												2.74-2.75	0.000303092	2.74543	3.13-3.14	8.06192e-05	3.1393
						2.96-2.97	8.59107e-05	2.9615																												2.75-2.76	0.000202061	2.7548	3.14-3.15	0.000241857	3.14337
						2.98-2.99	8.59107e-05	2.9854																												2.76-2.77	0.000101031	2.7698	3.15-3.16	8.06192e-05	3.1502
						3-3.01	8.59107e-05	3.0002																												2.77-2.78	0.000202061	2.77805	3.18-3.19	8.06192e-05	3.1883
						3.03-3.04	0.000171821	3.03705																												2.78-2.79	0.000101031	2.7838	3.2-3.21	8.06192e-05	3.2066
						3.04-3.05	0.000171821	3.04445																												2.8-2.81	0.000202061	2.80495	3.21-3.22	0.000161238	3.2198
						3.05-3.06	8.59107e-05	3.0587																												2.82-2.83	0.000202061	2.82815	3.22-3.23	8.06192e-05	3.2222
						3.09-3.1	8.59107e-05	3.0934																												2.83-2.84	0.000101031	2.8399	3.24-3.25	8.06192e-05	3.2477
						3.11-3.12	8.59107e-05	3.1182																												2.84-2.85	0.000101031	2.842	3.25-3.26	8.06192e-05	3.2554
						3.12-3.13	8.59107e-05	3.1258																												2.85-2.86	0.000101031	2.8523	3.27-3.28	8.06192e-05	3.2759
						3.19-3.2	8.59107e-05	3.1904																												2.86-2.87	0.000101031	2.8638	3.29-3.3	8.06192e-05	3.2921
						3.24-3.25	8.59107e-05	3.2416																												2.88-2.89	0.000101031	2.8828	3.3-3.31	0.000161238	3.30655
						3.26-3.27	8.59107e-05	3.2604																												2.91-2.92	0.000202061	2.9161	3.31-3.32	8.06192e-05	3.31
						3.27-3.28	8.59107e-05	3.2706																												2.92-2.93	0.000202061	2.9262	3.39-3.4	8.06192e-05	3.3921
						3.28-3.29	8.59107e-05	3.2899																												2.93-2.94	0.000101031	2.9345	3.7-3.71	0.000161238	3.70605
						3.29-3.3	8.59107e-05	3.2956																												2.95-2.96	0.000303092	2.95293	3.82-3.83	8.06192e-05	3.8201
						3.32-3.33	8.59107e-05	3.3281																												2.97-2.98	0.000101031	2.9722	3.89-3.9	0.000161238	3.8978
						3.39-3.4	8.59107e-05	3.399																												2.98-2.99	0.000101031	2.9812	4.16-4.17	8.06192e-05	4.1613
						3.42-3.43	8.59107e-05	3.426																												2.99-3	0.000101031	2.9994	4.24-4.25	8.06192e-05	4.244
						3.49-3.5	8.59107e-05	3.4957																												3-3.01	0.000101031	3.0094	4.33-4.34	8.06192e-05	4.3363
						3.51-3.52	8.59107e-05	3.5184																												3.04-3.05	0.000303092	3.04773	4.58-4.59	8.06192e-05	4.585
						3.57-3.58	8.59107e-05	3.5783																												3.05-3.06	0.000101031	3.0516	4.62-4.63	8.06192e-05	4.6288
						3.59-3.6	8.59107e-05	3.5966																												3.06-3.07	0.000202061	3.06255	4.7-4.71	8.06192e-05	4.7052
						3.65-3.66	8.59107e-05	3.6587																												3.07-3.08	0.000101031	3.0703	>5	8.06192e-05	5.0777
						3.66-3.67	8.59107e-05	3.6642																												3.08-3.09	0.000101031	3.087
						4.15-4.16	8.59107e-05	4.1599																												3.16-3.17	0.000202061	3.16515
																																				3.17-3.18	0.000101031	3.1731
																																				3.18-3.19	0.000202061	3.18085
																																				3.2-3.21	0.000202061	3.2065
																																				3.22-3.23	0.000101031	3.2254
																																				3.23-3.24	0.000101031	3.2361
																																				3.3-3.31	0.000101031	3.3063
																																				3.31-3.32	0.000101031	3.3146
																																				3.36-3.37	0.000101031	3.3698
																																				3.38-3.39	0.000101031	3.3819
																																				3.4-3.41	0.000202061	3.40525
																																				3.41-3.42	0.000101031	3.4192
																																				3.43-3.44	0.000101031	3.4397
																																				3.44-3.45	0.000101031	3.4403
																																				3.46-3.47	0.000101031	3.4665
																																				3.48-3.49	0.000202061	3.4805
																																				3.51-3.52	0.000101031	3.5154
																																				3.53-3.54	0.000101031	3.5306
																																				3.59-3.6	0.000101031	3.5983
																																				3.6-3.61	0.000202061	3.6059
																																				3.61-3.62	0.000101031	3.6121
																																				3.64-3.65	0.000101031	3.6434
																																				3.66-3.67	0.000101031	3.6684
																																				3.77-3.78	0.000101031	3.7792
																																				3.83-3.84	0.000101031	3.8396
																																				3.84-3.85	0.000101031	3.8464
																																				3.87-3.88	0.000101031	3.8789
																																				4.01-4.02	0.000101031	4.0148
																																				4.08-4.09	0.000101031	4.0874
																																				4.25-4.26	0.000101031	4.2542
																																				4.78-4.79	0.000101031	4.7882
																																				4.93-4.94	0.000101031	4.933
																																				>5	0.000404122	5.36835
[truncated: 10 more columns]
