# Supplementary material for: Natural selection and repeated patterns of molecular evolution following allopatric divergence
Source: eLife. 2019 Aug 2;8:e45199. doi: 10.7554/eLife.45199 (PMC6744222; doi:10.7554/eLife.45199)
Supplement: Supplementary file 5. [file elife-45199-supp5.xlsx]

## Sheet: Cell_components_function_summar
Process	GO	Acorus	Calycanthus	Campsis	Convallaria	Cornus-1	Cornus-2	Cotinus	Croomia	Dysosma	Gelsemium	Hamamelis	Liquidambar	Liriodendron	Meehania	Menispermum	Nelumbo	Penthorum	Phryma	Sassafras	Saururus	Number of species with item	Percent of species with item(%)
Cell components	endomembrane system	0	0	0	4	0	0	3	6	0	2	0	0	0	0	0	0	5	0	0	0	5	25
Cell components	nuclear part	3	3	0	0	0	0	3	0	0	0	0	0	0	0	0	0	0	0	0	0	3	15
Cell components	cell periphery	0	0	0	0	0	0	3	0	2	0	0	0	0	0	0	0	0	0	0	0	2	10
Cell components	cytosolic small ribosomal subunit	0	0	0	0	0	4	0	0	0	0	0	0	0	0	0	0	0	0	0	0	1	5
Cell components	nuclear chromosome part	0	0	0	0	0	0	0	0	2	0	0	0	0	0	0	0	0	0	0	0	1	5
Cell components	plastid	0	0	0	0	0	0	0	0	0	0	0	0	0	0	0	6	0	0	0	0	1	5
Cell components	macromolecular complex	0	3	0	0	0	0	0	0	0	0	0	0	0	0	0	0	0	0	10	0	2	10
Cell components	intracellular organelle part	0	0	3	0	0	0	0	0	0	0	3	0	0	3	0	11	0	0	7	10	6	30
Cell components	nucleus	0	0	6	0	5	4	0	9	0	3	0	4	2	4	4	9	5	11	9	0	13	65
Cell components	organelle envelope	0	3	0	0	0	0	0	0	0	0	0	0	0	0	0	0	6	0	0	0	2	10
Cell components	membrane protein complex	0	0	0	0	0	0	0	0	0	0	0	0	0	0	0	0	4	0	0	0	1	5
Cell components	vacuole	0	0	0	0	0	0	0	0	0	0	0	0	1	0	0	0	0	0	0	0	1	5
Cell components	mitochondrion	0	4	0	0	0	5	0	0	2	2	0	0	0	3	0	0	4	0	0	7	7	35
Cell components	membrane-bounded vesicle	0	0	0	3	0	0	0	0	0	0	0	0	0	0	0	0	0	0	0	0	1	5
Cell components	mitochondrial matrix	0	0	0	0	0	0	0	0	0	0	0	0	1	0	0	0	0	0	0	0	1	5
Cell components	ribosome	4	0	4	0	0	0	0	0	0	4	0	0	0	4	0	0	5	0	0	0	5	25
Cell components	endoplasmic reticulum	0	0	0	0	0	0	0	0	0	0	0	0	1	0	0	0	0	0	0	0	1	5
Cell components	intracellular membrane-bounded organelle	0	0	0	0	0	0	0	0	0	0	4	0	0	0	0	0	0	0	0	0	1	5
Cell components	cytosolic large ribosomal subunit	0	0	0	3	0	0	0	0	0	0	0	0	0	0	0	0	0	0	0	0	1	5
Cell components	plasmodesma	0	0	0	0	0	0	0	0	0	0	5	0	1	0	0	0	0	0	0	0	2	10
Cell components	intracellular ribonucleoprotein complex	0	0	0	0	0	0	0	0	3	0	0	0	0	0	0	0	0	0	0	4	2	10
Cell components	chloroplast part	0	0	0	0	0	0	0	0	2	0	0	4	0	0	0	0	4	0	0	0	3	15
Cell components	integral component of membrane	12	13	12	8	20	12	18	26	7	7	16	15	7	10	14	26	15	13	21	16	20	100
Cell components	Golgi apparatus	0	3	0	0	0	0	0	0	0	0	0	0	0	0	0	0	0	0	0	0	1	5
Cell components	cytosolic ribosome	0	0	0	0	4	0	0	6	0	0	0	0	0	0	0	0	0	0	0	0	2	10
Cell components	chloroplast	0	4	0	4	0	0	0	9	0	0	0	0	1	3	0	0	0	0	0	0	5	25
Cell components	ribosomal subunit	0	0	0	0	5	0	0	6	0	0	0	0	0	0	3	0	0	5	0	0	4	20
Cell components	thylakoid	0	0	0	0	0	0	0	0	2	0	0	0	0	0	0	0	0	0	0	0	1	5
Cell components	chloroplast envelope	0	0	0	0	0	0	3	0	0	2	0	0	0	0	4	0	0	0	0	0	3	15
Cell components	cytoplasmic part	0	0	0	0	0	0	0	0	0	0	4	0	0	0	0	0	0	0	17	0	2	10
Cell components	nuclear lumen	0	0	0	4	0	0	0	0	0	0	0	0	0	0	0	0	0	0	0	0	1	5
Cell components	protein complex	5	0	2	5	0	0	5	7	3	2	0	4	0	3	0	6	0	0	0	0	10	50
Cell components	plasma membrane	0	4	0	0	5	0	0	0	0	4	4	5	1	0	0	0	0	0	6	0	7	35
Cell components	cytosol	4	0	3	0	0	0	0	0	0	0	0	0	0	3	4	0	7	6	0	4	7	35
Cell components	intracellular non-membrane-bounded organelle	0	0	0	0	0	0	3	0	0	0	0	0	0	0	0	0	0	0	0	6	2	10
Cell components	organelle membrane	0	3	2	0	0	0	0	6	0	0	0	0	0	0	0	0	6	0	0	0	4	20
Cell components	catalytic complex	0	0	0	0	0	0	0	0	0	0	0	0	0	0	0	0	0	5	0	0	1	5
Cell components	chloroplast stroma	0	0	0	0	0	0	3	0	0	0	0	0	0	0	0	0	0	0	0	0	1	5
Cell components	organelle subcompartment	0	0	0	0	0	0	0	0	2	0	0	0	0	0	0	0	0	0	0	0	1	5
Molecular function	nucleotidyltransferase activity	2	0	0	0	0	0	0	0	0	0	0	0	0	0	0	0	0	0	0	0	1	5
Molecular function	pyrophosphatase activity	0	0	0	3	0	0	0	0	2	0	0	0	0	0	0	0	0	0	0	0	2	10
Molecular function	isomerase activity	0	0	0	0	0	0	0	0	0	0	3	0	0	0	0	0	0	0	0	0	1	5
Molecular function	nucleoside-triphosphatase activity	0	0	2	0	0	0	0	0	0	0	0	0	0	0	0	0	0	0	0	0	1	5
Molecular function	transferase activity, transferring acyl groups other than amino-acyl groups	0	0	0	0	0	0	0	0	0	0	0	0	2	0	0	0	0	0	0	0	1	5
Molecular function	methyltransferase activity	2	0	2	0	0	0	0	0	0	0	0	0	0	0	0	0	0	0	0	0	2	10
Molecular function	nucleotide binding	0	0	0	0	0	0	0	0	0	0	0	0	0	0	0	8	0	0	0	5	2	10
Molecular function	transporter activity	0	0	0	0	0	0	0	0	0	0	0	0	0	0	5	7	0	0	0	0	2	10
Molecular function	ion transmembrane transporter activity	0	0	0	0	0	0	0	0	0	0	0	0	0	3	0	0	0	0	0	0	1	5
Molecular function	nucleic acid binding	0	3	0	0	0	0	0	0	0	0	0	0	0	0	0	14	0	0	10	0	3	15
Molecular function	adenyl nucleotide binding	0	0	0	0	0	0	0	0	2	0	0	0	0	0	0	0	0	0	0	0	1	5
Molecular function	protein kinase activity	0	0	0	0	0	6	0	0	0	0	6	4	2	0	0	0	4	0	6	4	7	35
Molecular function	transferase activity	0	0	0	3	7	0	0	0	0	6	0	0	0	0	0	14	0	0	0	0	4	20
Molecular function	hydrolase activity	0	0	0	0	0	10	12	11	0	0	4	0	3	3	7	0	6	8	10	0	10	50
Molecular function	transferase activity, transferring glycosyl groups	0	0	0	0	0	0	0	7	0	0	0	0	0	0	0	0	0	0	0	2	2	10
Molecular function	purine ribonucleotide binding	0	3	2	3	0	5	0	0	0	0	0	0	0	0	0	0	0	0	0	0	4	20
Molecular function	hydrolase activity, hydrolyzing O-glycosyl compounds	2	0	0	0	0	0	0	0	0	0	0	0	0	0	0	0	0	0	0	0	1	5
Molecular function	ubiquitin-protein transferase activity	0	0	2	0	0	0	0	0	0	0	0	0	0	0	0	0	0	0	0	0	1	5
Molecular function	phosphotransferase activity, alcohol group as acceptor	0	0	0	0	0	0	6	0	2	0	0	0	0	3	0	0	0	0	0	0	3	15
Molecular function	purine ribonucleoside triphosphate binding	0	3	2	3	0	0	0	0	0	3	0	0	0	0	0	0	0	0	0	0	4	20
Molecular function	protein homodimerization activity	0	0	0	0	0	0	0	0	3	0	0	0	0	0	0	0	0	0	0	0	1	5
Molecular function	electron carrier activity	0	0	0	0	0	0	0	0	0	0	0	0	0	4	0	0	0	0	0	0	1	5
Molecular function	magnesium ion binding	0	0	0	0	0	0	0	0	2	0	0	0	0	0	0	0	0	0	0	0	1	5
Molecular function	adenylyltransferase activity	0	0	0	0	0	0	0	0	2	0	0	0	0	0	0	0	0	0	0	0	1	5
Molecular function	purine ribonucleoside binding	0	3	2	3	0	5	0	0	0	4	0	0	0	0	0	0	0	0	0	0	5	25
Molecular function	kinase activity	0	3	0	0	0	0	7	0	3	0	0	0	0	5	0	0	0	7	0	0	5	25
Molecular function	ligase activity	0	0	0	0	0	0	0	0	0	0	0	0	0	0	0	0	0	0	0	2	1	5
Molecular function	lyase activity	0	0	0	0	0	0	0	0	0	0	0	0	2	0	0	0	0	0	0	0	1	5
Molecular function	inorganic cation transmembrane transporter activity	2	0	0	0	0	0	0	0	0	0	0	0	0	0	0	0	0	0	0	0	1	5
Molecular function	zinc ion binding	7	4	4	4	5	0	0	6	2	0	0	0	5	0	0	7	4	7	6	2	13	65
Molecular function	monooxygenase activity	2	0	0	0	0	0	0	0	0	0	0	0	0	0	0	0	0	0	0	0	1	5
Molecular function	RNA binding	3	0	0	5	5	6	0	7	2	3	0	0	0	3	0	0	0	6	0	4	10	50
Molecular function	transferase activity, transferring phosphorus-containing groups	0	0	2	0	0	0	0	0	0	0	0	0	0	0	7	0	0	0	0	0	2	10
Molecular function	protein binding	0	3	0	0	0	0	0	0	0	4	3	0	0	0	6	0	5	7	5	3	8	40
Molecular function	DNA binding	7	0	2	3	0	0	0	6	0	0	3	0	2	0	6	0	4	0	0	2	9	45
Molecular function	active transmembrane transporter activity	0	0	0	0	5	0	0	0	0	0	0	0	0	0	0	0	0	0	0	0	1	5
Molecular function	endopeptidase activity	0	0	0	3	0	0	0	0	2	4	0	0	0	0	0	0	0	0	0	0	3	15
Molecular function	ATP binding	0	0	0	0	6	0	5	6	0	0	5	4	2	4	5	0	7	6	6	0	11	55
Molecular function	structural constituent of ribosome	4	0	5	6	10	8	0	10	0	3	0	0	0	4	5	0	5	12	0	2	12	60
Molecular function	anion binding	0	0	0	0	0	7	0	0	0	0	0	0	0	0	0	0	0	0	0	0	1	5
Molecular function	NADH dehydrogenase (ubiquinone) activity	0	0	0	0	0	0	0	0	0	0	0	0	0	0	0	0	0	0	0	2	1	5
Molecular function	hydrolase activity, acting on glycosyl bonds	0	0	0	0	0	0	0	0	0	0	0	0	0	0	0	0	0	0	0	2	1	5
Molecular function	peptidase activity	0	0	0	0	5	0	0	0	0	0	0	0	0	0	0	0	0	0	0	2	2	10
Molecular function	transferase activity, transferring acyl groups	0	0	0	0	0	0	0	0	2	0	0	0	0	0	0	0	0	0	0	0	1	5
Molecular function	oxidoreductase activity	0	5	5	4	5	0	7	0	3	3	0	0	3	8	6	0	3	6	6	0	13	65
Molecular function	signal transducer activity	0	0	0	0	0	0	0	0	2	0	0	0	0	0	0	0	0	0	0	0	1	5
Molecular function	metal ion binding	0	0	0	0	0	7	0	0	0	0	0	6	0	0	0	0	0	0	0	0	2	10
Molecular function	transition metal ion binding	0	0	0	0	0	0	5	0	0	3	3	0	0	4	5	0	0	0	0	0	5	25
Molecular function	adenyl ribonucleotide binding	0	0	0	0	0	0	0	0	0	3	0	0	0	0	0	0	0	0	0	0	1	5
Molecular function	hydrolase activity, acting on ester bonds	0	3	2	0	0	0	0	0	2	0	0	5	0	0	0	10	0	0	0	2	6	30
Biology process	regulation of cellular macromolecule biosynthetic process	0	0	0	0	0	0	0	6	0	0	0	0	2	0	0	7	0	0	0	0	3	15
Biology process	RNA modification	0	0	0	0	0	0	4	0	0	0	0	0	0	0	0	0	0	0	0	0	1	5
Biology process	response to inorganic substance	0	0	3	0	0	0	0	0	0	0	0	0	0	0	0	0	0	0	0	0	1	5
Biology process	organonitrogen compound biosynthetic process	0	3	0	0	0	0	4	0	0	0	0	5	0	0	0	9	0	0	0	5	5	25
Biology process	defense response to other organism	0	0	0	0	0	0	0	0	0	0	0	0	0	0	0	0	0	0	0	3	1	5
Biology process	regulation of primary metabolic process	0	0	0	0	0	0	0	7	0	0	0	3	2	0	0	7	0	6	0	0	5	25
Biology process	cellular protein modification process	3	0	0	0	0	0	9	0	0	3	0	4	0	3	6	7	5	6	0	4	10	50
Biology process	carbohydrate biosynthetic process	0	0	0	3	0	0	0	0	0	0	0	0	0	0	0	0	0	0	0	0	1	5
Biology process	cellular component organization or biogenesis	0	0	0	0	0	5	0	0	0	0	0	0	0	3	0	0	0	0	0	0	2	10
Biology process	phosphate-containing compound metabolic process	0	0	3	4	0	0	0	0	0	4	0	0	0	0	8	11	0	0	0	0	5	25
Biology process	organelle organization	0	0	3	0	0	0	5	0	0	0	0	0	0	0	0	0	0	0	0	4	3	15
Biology process	metal ion transport	0	0	0	0	0	0	0	0	2	0	0	3	2	0	0	0	0	0	0	0	3	15
Biology process	carboxylic acid metabolic process	0	4	0	0	0	0	0	6	0	0	0	0	0	0	5	0	0	0	0	0	3	15
Biology process	RNA processing	0	0	0	5	6	0	0	7	2	0	0	0	0	0	0	0	0	0	0	0	4	20
Biology process	signal transduction	0	0	0	0	0	5	0	0	3	0	0	4	0	0	0	0	0	0	0	0	3	15
Biology process	dephosphorylation	0	0	0	0	0	0	4	0	0	0	2	0	0	0	0	0	0	0	0	0	2	10
Biology process	single-organism developmental process	0	0	0	0	0	0	0	0	0	0	0	3	0	0	0	0	5	0	0	3	3	15
Biology process	secondary metabolic process	3	0	0	0	0	0	0	0	0	0	0	0	0	0	0	0	0	0	0	0	1	5
Biology process	DNA metabolic process	0	0	0	5	0	0	0	0	2	3	0	0	0	0	0	7	0	0	0	0	4	20
Biology process	anatomical structure morphogenesis	3	0	0	0	0	0	0	0	0	0	0	0	0	0	0	0	0	0	0	0	1	5
Biology process	organic substance transport	0	0	0	0	0	0	0	0	0	0	0	0	0	0	0	0	6	0	0	0	1	5
Biology process	macromolecule localization	0	0	0	0	0	0	0	0	0	0	0	0	0	0	0	0	5	0	0	0	1	5
Biology process	proteolysis involved in cellular protein catabolic process	0	0	0	3	0	0	0	0	0	0	0	0	0	0	0	0	0	0	0	0	1	5
Biology process	regulation of nitrogen compound metabolic process	0	0	0	0	0	0	0	6	0	0	0	0	2	0	0	7	0	0	0	0	3	15
Biology process	plant organ development	3	0	0	0	0	0	0	0	0	0	0	0	0	0	0	0	0	0	0	0	1	5
Biology process	response to external stimulus	0	3	0	3	0	0	0	0	0	0	2	0	0	0	0	0	0	0	0	0	3	15
Biology process	calcium-mediated signaling	0	0	0	0	0	0	0	0	0	0	2	0	0	0	0	0	0	0	0	0	1	5
Biology process	response to abiotic stimulus	0	0	0	5	0	0	0	0	0	0	3	0	0	0	0	0	0	0	0	4	3	15
Biology process	heterocycle biosynthetic process	0	0	0	0	0	0	0	0	0	0	0	3	0	0	0	0	5	0	0	0	2	10
Biology process	multi-organism process	0	3	0	0	0	0	0	0	0	0	0	0	0	3	0	0	0	0	0	0	2	10
Biology process	single-organism carbohydrate metabolic process	0	0	0	0	0	0	0	0	2	0	0	3	0	3	0	0	0	0	0	0	3	15
Biology process	cellular catabolic process	0	0	0	0	0	7	0	0	0	0	0	4	0	0	0	0	5	0	0	0	3	15
Biology process	single-organism catabolic process	0	0	0	0	0	0	0	0	0	0	0	5	0	0	0	0	5	0	0	0	2	10
Biology process	proteolysis	0	0	0	0	5	0	6	0	3	4	0	0	0	0	0	0	0	0	0	0	4	20
Biology process	carboxylic acid biosynthetic process	0	0	0	0	0	0	0	0	0	0	0	0	0	3	0	0	0	0	0	0	1	5
Biology process	regulation of protein modification process	0	3	0	0	0	0	0	0	0	0	0	0	0	0	0	0	0	0	0	0	1	5
Biology process	system development	0	0	0	3	0	0	5	6	0	0	0	0	0	0	0	0	0	0	0	0	3	15
Biology process	regulation of transcription DNA-templated	5	0	0	0	0	0	0	0	0	0	0	0	0	0	0	0	0	0	0	0	1	5
Biology process	regulation of metabolic process	0	0	0	0	0	0	0	0	0	0	0	0	0	0	0	0	5	0	0	0	1	5
Biology process	methylation	3	0	3	0	0	0	0	0	0	0	0	0	0	0	0	0	0	0	0	0	2	10
Biology process	cell differentiation	3	0	0	0	0	0	0	0	0	0	0	0	0	0	0	0	0	0	0	0	1	5
Biology process	response to starvation	0	0	0	0	0	0	0	0	0	0	0	0	2	0	0	0	0	0	0	0	1	5
Biology process	regulation of cellular process	0	0	0	0	7	0	0	0	0	3	0	0	0	0	0	0	8	8	0	0	4	20
Biology process	cellular response to stimulus	3	3	0	0	6	0	4	0	0	0	0	0	0	3	0	0	0	0	0	0	5	25
Biology process	small molecule biosynthetic process	0	0	0	0	0	0	4	0	0	0	0	0	0	0	0	0	0	0	0	0	1	5
Biology process	translation	5	0	6	7	13	10	0	13	0	3	0	0	3	4	5	0	6	12	6	0	13	65
Biology process	alpha-amino acid metabolic process	0	0	0	0	0	0	0	0	0	0	0	3	0	0	0	0	0	0	0	0	1	5
Biology process	response to stimulus	0	0	0	0	0	0	0	0	0	0	0	0	0	0	0	12	0	0	6	0	2	10
Biology process	cellular response to extracellular stimulus	0	0	0	0	0	0	0	0	0	0	0	0	2	0	0	0	0	0	0	0	1	5
Biology process	developmental process involved in reproduction	0	0	0	0	0	0	0	6	0	0	0	0	0	0	0	0	0	0	0	0	1	5
Biology process	response to oxygen-containing compound	0	0	3	0	0	0	0	0	0	0	2	0	0	0	0	0	0	0	0	0	2	10
Biology process	organic substance catabolic process	0	0	0	0	0	0	4	0	0	0	0	6	0	0	0	0	6	0	0	0	3	15
Biology process	single-organism biosynthetic process	6	4	3	0	0	0	0	9	0	0	0	5	0	0	6	0	5	7	5	4	10	50
Biology process	anion transport	0	0	3	0	0	0	0	0	0	0	0	0	0	0	0	0	0	0	0	0	1	5
Biology process	regulation of gene expression	0	0	0	0	0	0	0	6	0	0	0	0	2	0	0	9	0	0	0	0	3	15
Biology process	positive regulation of cellular metabolic process	0	0	0	0	0	0	0	0	0	0	0	0	0	0	0	0	0	0	5	0	1	5
Biology process	cell communication	0	0	0	0	0	0	0	0	0	0	0	0	0	4	0	0	0	0	0	0	1	5
Biology process	response to light stimulus	0	0	0	0	0	0	0	0	2	0	0	0	0	0	0	0	0	0	0	0	1	5
Biology process	nucleic acid metabolic process	0	5	0	0	0	0	0	0	0	0	0	0	0	0	5	0	0	0	0	0	2	10
Biology process	cellular nitrogen compound biosynthetic process	0	3	0	0	0	0	0	0	2	0	0	5	0	0	0	0	0	0	0	0	3	15
Biology process	single-organism metabolic process	0	0	0	0	0	0	0	0	0	4	0	0	0	0	0	0	0	0	0	0	1	5
Biology process	protein complex subunit organization	0	0	0	0	0	0	0	0	0	0	0	0	0	0	0	0	0	0	5	0	1	5
Biology process	DNA integration	0	0	0	0	0	0	0	0	0	0	0	0	2	0	0	0	0	0	0	0	1	5
Biology process	ion transport	0	0	0	0	5	0	0	0	0	0	0	0	0	0	5	7	0	0	0	0	3	15
Biology process	peptide metabolic process	0	3	0	0	0	0	0	0	0	0	0	0	0	0	0	0	0	0	0	0	1	5
Biology process	oxidation-reduction process	0	5	4	4	6	5	5	0	3	0	0	0	2	6	7	0	5	6	6	4	14	70
Biology process	macromolecular complex subunit organization	0	0	3	0	0	0	0	0	0	0	0	0	0	0	0	0	0	0	0	0	1	5
Biology process	intracellular protein transport	0	3	0	3	0	0	0	0	0	0	0	4	0	0	0	0	0	0	0	0	3	15
Biology process	gene expression	0		0	0	0	0	0	0	0	0	0	5	0	0	0	0	0	0	0	0	1	5
Biology process	cation transport	3	0	0	0	0	0	0	0	0	0	0	0	0	3	0	0	0	0	0	0	2	10
Biology process	transmembrane transport	3	0	0	0	6	0	0	0	0	0	2	0	0	0	5	0	0	0	0	0	4	20
Biology process	regulation of cellular metabolic process	0	0	0	0	0	0	0	0	2	0	0	0	0	0	0	0	0	0	0	0	1	5
Biology process	carbohydrate metabolic process	3	0	0	0	0	0	0	9	0	0	0	0	0	0	0	0	0	0	0	0	2	10
Biology process	establishment of localization in cell	0	0	0	0	0	0	0	0	2	0	0	0	0	0	0	0	0	0	0	0	1	5
Biology process	post-embryonic development	0	0	0	0	0	0	0	6	0	0	0	0	0	0	0	0	0	0	0	0	1	5
Biology process	cellular response to organic substance	0	0	0	0	0	0	0	0	0	0	2	0	0	0	0	0	0	0	0	0	1	5
Biology process	cellular protein catabolic process	0	0	0	0	0	0	0	0	2	0	0	0	0	0	0	0	0	0	0	0	1	5
Biology process	monocarboxylic acid metabolic process	0	0	0	3	0	0	4	0	0	0	0	0	0	0	0	0	0	0	0	0	2	10
Biology process	multicellular organismal process	0	0	0	0	0	0	0	0	0	0	0	0	0	4	0	0	0	0	0	0	1	5
Biology process	multi-organism reproductive process	0	0	0	3	0	0	0	0	0	0	0	0	0	0	0	0	0	0	0	0	1	5
Biology process	macromolecule modification	0	0	0	0	5	0	0	6	0	0	0	0	0	0	0	0	0	0	0	0	2	10
Biology process	developmental process	0	0	0	0	0	0	0	0	0	0	0	0	0	0	0	7	0	0	0	0	1	5
Biology process	carbohydrate derivative metabolic process	0	0	0	3	5	0	0	0	0	0	0	0	0	0	0	0	0	0	0	0	2	10
Biology process	cell cycle	3	0	0	3	0	0	0	0	0	0	0	0	0	0	0	0	0	0	0	0	2	10
Biology process	single-organism cellular process	0	0	11	0	0	0	0	0	0	8	0	0	0	0	0	0	16	16	17	0	5	25
Biology process	RNA metabolic process	0	0	0	0	0	8	0	0	0	0	0	0	2	0	0	0	7	8	0	0	4	20
Biology process	single-organism transport	0	0	0	0	0	5	4	6	0	3	0	0	0	0	0	0	7	7	7	5	8	40
Biology process	peptidyl-amino acid modification	0	0	3	3	0	0	0	0	0	0	0	0	0	0	0	0	0	0	0	0	2	10
Biology process	response to stress	4	5	0	5	5	0	5	6	3	7	0	0	0	0	0	0	6	0	0	0	9	45
Biology process	regulation of biological quality	0	0	0	0	0	0	0	0	2	0	0	3	0	0	0	0	0	0	0	0	2	10
Biology process	positive regulation of macromolecule metabolic process	0	0	0	0	0	0	0	0	0	0	0	0	0	0	0	0	0	0	5	0	1	5
Biology process	response to organic substance	3	0	0	0	0	0	0	0	0	0	0	3	0	0	0	0	0	0	0	3	3	15
Biology process	lipid metabolic process	0	0	0	0	0	0	0	8	0	0	0	3	0	0	0	0	0	0	0	0	2	10
Biology process	cellular component assembly	0	3	0	0	0	0	0	0	0	0	0	0	0	0	0	0	0	0	0	0	1	5
Biology process	regulation of transcription, DNA-templated	0	0	3	5	0	0	4	0	0	0	2	0	0	3	0	0	0	0	5	3	7	35
Biology process	cellular macromolecular complex assembly	0	0	0	3	0	0	0	0	0	0	0	0	0	0	0	0	0	0	0	0	1	5
Biology process	single-organism intracellular transport	0	3	0	3	0	0	0	0	0	0	0	4	0	0	0	0	0	0	0	0	3	15
Biology process	regulation of biological process	0	0	0	0	0	0	0	0	0	0	0	0	0	0	6	0	0	0	0	0	1	5
Biology process	organonitrogen compound metabolic process	0	0	0	0	0	0	0	0	2	0	0	0	0	0	0	0	0	0	0	0	1	5
Biology process	immune system process	0	0	0	0	0	0	0	0	0	0	2	0	0	0	0	0	0	0	0	0	1	5
Biology process	response to endogenous stimulus	0	0	0	0	0	0	0	0	0	0	2	0	0	0	0	0	0	0	0	0	1	5
Biology process	protein targeting	0	0	0	0	0	0	0	0	0	0	2	0	0	0	0	0	0	0	0	0	1	5
Biology process	small molecule metabolic process	4	0	0	0	0	0	0	0	0	0	2	0	0	0	0	8	7	6	0	0	5	25
Biology process	cellular component organization	0	0	0	0	5	0	0	9	0	0	2	4	0	0	0	9	7	6	0	0	7	35
Biology process	response to other organism	0	0	0	0	0	0	0	0	0	0	0	3	0	0	0	0	0	0	0	0	1	5
Biology process	organic cyclic compound biosynthetic process	0	0	0	0	0	0	0	0	0	0	0	3	0	0	0	0	6	0	0	0	2	10
Biology process	single-organism cellular localization	0	0	0	0	0	0	0	0	0	0	2	0	0	0	0	0	0	0	0	0	1	5
Biology process	transcription, DNA-templated	0	0	0	0	0	0	0	0	0	0	0	0	0	0	0	8	0	0	0	0	1	5
Biology process	lipid biosynthetic process	0	0	0	3	0	0	0	0	0	0	0	0	0	3	0	8	0	0	0	0	3	15
Biology process	cellular component biogenesis	3	0	0	0	0	0	0	10	2	0	0	0	0	0	0	0	0	7	6	0	5	25
Biology process	cell-cell signaling	0	0	0	0	0	0	0	0	0	0	2	0	0	0	0	0	0	0	0	0	1	5
Biology process	photosynthesis, light reaction	0	0	0	0	0	0	0	0	2	0	0	0	0	0	0	0	0	0	0	0	1	5
Biology process	response to chemical	0	3	0	4	6	6	0	6	0	0	0	0	0	3	6	0	6	7	0	0	9	45
Biology process	nucleotide metabolic process	0	0	0	0	0	0	0	0	0	0	0	0	0	0	0	0	0	0	0	3	1	5
Biology process	protein phosphorylation	0	0	0	0	0	0	0	0	2	0	3	0	2	0	0	0	0	0	6	0	4	20
Biology process	phosphorylation	0	4	0	0	5	6	6	0	0	0	0	5	0	5	0	0	8	7	0	6	9	45
Biology process	cellular macromolecule biosynthetic process	0	3	0	0	0	0	0	0	3	0	0	5	0	0	0	0	0	0	0	0	3	15
Biology process	single organism reproductive process	0	0	0	3	0	0	0	6	0	0	0	0	0	0	0	0	0	0	0	0	2	10
Biology process	nucleobase-containing compound metabolic process	0	0	0	0	0	0	0	0	0	0	0	4	0	0	0	0	0	0	0	0	1	5
Biology process	organophosphate biosynthetic process	0	0	0	0	0	0	0	0	0	0	0	0	0	0	0	0	0	0	0	3	1	5
Biology process	plastid organization	0	0	0	0	0	0	0	0	2	0	0	0	0	0	0	0	0	0	0	0	1	5
Biology process	defense response	0	0	0	0	0	0	0	0	0	0	6	3	0	3	0	0	0	0	0	0	3	15
Biology process	cellular homeostasis	0	0	0	0	0	0	0	0	0	0	0	0	0	4	0	0	0	0	0	0	1	5
Biology process	single-organism organelle organization	3	3	0	3	0	0	0	0	0	0	0	0	0	0	0	0	0	0	0	0	3	15
Biology process	cytoplasmic transport	0	3	0	3	0	0	0	0	0	0	2	0	0	0	0	0	0	0	0	0	3	15
Biology process	negative regulation of metabolic process	0	0	0	0	0	0	0	0	2	0	0	0	0	0	0	0	0	0	0	0	1	5
Biology process	cellular response to stress	0	0	0	0	0	0	0	0	0	0	2	0	2	0	0	0	0	0	0	0	2	10
Biology process	organophosphate metabolic process	0	3	0	3	0	0	0	0	0	0	0	4	0	0	0	0	0	0	0	0	3	15
Biology process	generation of precursor metabolites and energy	0	4	0	0	0	0	0	0	0	0	0	0	0	0	0	0	0	0	0	3	2	10
Biology process	transcription from RNA polymerase II promoter	0	0	0	3	0	0	0	0	0	0	0	0	0	0	0	0	0	0	0	0	1	5
Biology process	cellular lipid metabolic process	0	3	0	3	0	0	4	0	0	0	0	0	0	4	0	8	0	0	0	0	5	25
Biology process	aromatic compound biosynthetic process	0	0	0	0	0	0	0	0	0	0	0	3	0	0	0	0	5	0	0	0	2	10
Biology process	cellular amino acid metabolic process	0	0	0	0	0	0	0	0	0	0	0	0	2	0	0	0	0	0	0	0	1	5
Biology process	ncRNA processing	0	0	0	0	0	0	4	0	0	0	0	0	0	0	0	0	0	0	0	0	1	5
	Num of items without 0	33	41	32	46	27	21	32	35	44	28	32	38	30	36	25	27	41	27	25	34	100
	percent of items without 0 (%)	14.7321	18.3036	14.2857	20.5357	12.0536	9.375	14.2857	15.625	19.6429	12.5	14.2857	16.9643	13.3929	16.0714	11.1607	12.0536	18.3036	12.0536	11.1607	15.1786	100 Terms unique to a genus
