# Supplementary material for: Natural selection and repeated patterns of molecular evolution following allopatric divergence
Source: eLife. 2019 Aug 2;8:e45199. doi: 10.7554/eLife.45199 (PMC6744222; doi:10.7554/eLife.45199)
Supplement: Supplementary file 6. [file elife-45199-supp6.xls]

## Sheet: KaKsOver2_Varclus
Reaults of Variation Cluster Analysis (Wagner 2007) for genes with Ka/Ks >2. A p-values < 0.05 indicate significance
of variation cluster derivated from neutral expectation. The P values were corrected through a FDR correction to
account for the multiple tests.
Genus	# of genes with p < 0.05)	# of genes with p > 0.05	% of genes with significant variation cluster		frquency
Acorus	76	25	75.2475	50	0
Calycanthus	97	17	85.0877	60	1
Campsis	54	17	76.0563	70	4
Convallaria	89	35	71.7742	80	12
Cornus1	85	37	69.6721	90	3
Cornus2	90	25	78.2609	100	1
Cotinus	102	25	80.315
Croomia	136	36	79.0698
Dysosma	88	22	80
Gelsemium	52	14	78.7879
Hamamelis	65	49	57.0175
Liquidambar	85	39	68.5484
Liriodendron	61	16	79.2208
Meehania	54	30	64.2857
Menispermum	74	37	66.6667
Nelumbo	169	14	92.3497
Pachysandra	46	13	77.9661
Penthorum	80	12	86.9565
Phryma	85	31	73.2759
Sassafras	127	32	79.8742
Saururus	82	21	79.6117

## Sheet: Varclus_result
Gene1	Gene2	NumDiffs	Pvalue	FDRCorrectedPValue	NumRes_ClusterwHighP	ClusterLen_FracTotalLength	Coords
Acorus_calamus|scaffold268	Acorus_gramineus|scaffold8712	32	0.0276276	0.0377079		10	9.81041e+28
Acorus_calamus|scaffold684	Acorus_gramineus|scaffold16863	15	0.134237	0.155838		2	130131
Acorus_calamus|scaffold858	Acorus_gramineus|scaffold2606	6	0.514785	0.525185		2	404407
Acorus_calamus|scaffold875	Acorus_gramineus|C85255	2	0.999184	0.999184		2	2,3
Acorus_calamus|scaffold970	Acorus_gramineus|scaffold1601	14	0.0879285	0.106997		4	56,57,58,59
Acorus_calamus|scaffold2378	Acorus_gramineus|scaffold756	17	0.129361	0.151924		2	452453
Acorus_calamus|scaffold2386	Acorus_gramineus|C259571	19	0.0384352	0.050415		8	71,80,89,92,104,123,124,128
Acorus_calamus|scaffold2566	Acorus_gramineus|scaffold3488	11	0.0204727	0.0291231		4	456458464466
Acorus_calamus|scaffold2835	Acorus_gramineus|scaffold8227	7	0.137697	0.158038		2	602602
Acorus_calamus|scaffold3168	Acorus_gramineus|C267049	21	0.119742	0.143975		6	2.96302e+17
Acorus_calamus|scaffold3301	Acorus_gramineus|C270117	10	0.447108	0.468673		2	566569
Acorus_calamus|scaffold3849	Acorus_gramineus|C135927	19	0.68987	0.696769		6	17,18,19,20,21,22
Acorus_calamus|scaffold4495	Acorus_gramineus|C206020	8	8.48907e-06	3.29768e-05		11	18,19,20,21,22,26,27,29,30,31,32
Acorus_calamus|scaffold5791	Acorus_gramineus|scaffold11844	7	7.14229e-06	2.88549e-05		11	18,19,20,21,22,26,27,29,30,31,32
Acorus_calamus|scaffold5791	Acorus_gramineus|scaffold11844	7	7.14229e-06	2.88549e-05		11	18,19,20,21,22,26,27,29,30,31,32
Acorus_calamus|scaffold5968	Acorus_gramineus|C261633	8	3.25777e-08	4.93145e-07		11	18,19,20,21,22,26,27,29,30,31,32
Acorus_calamus|scaffold6174	Acorus_gramineus|scaffold17980	7	6.74311e-07	4.54036e-06		11	18,19,20,21,22,26,27,29,30,31,32
Acorus_calamus|scaffold6400	Acorus_gramineus|scaffold15671	5	6.42097e-07	4.54036e-06		12	18,19,20,21,22,26,27,29,30,31,32,33
Acorus_calamus|scaffold6414	Acorus_gramineus|scaffold5141	8	6.35632e-05	0.000160497		11	18,19,20,21,22,26,27,29,30,31,32
Acorus_calamus|scaffold6801	Acorus_gramineus|scaffold484	18	0.0548749	0.0692796		6	14,20,29,32,35,39
Acorus_calamus|scaffold7952	Acorus_gramineus|C241164	7	0.16539	0.185605		2	360361
Acorus_calamus|scaffold11300	Acorus_gramineus|C193251	13	0.299216	0.328487		2	19,20
Acorus_calamus|scaffold11406	Acorus_gramineus|C242539	10	0.341836	0.371241		2	360361
Acorus_calamus|scaffold11410	Acorus_gramineus|scaffold11190	9	0.144305	0.163762		3	168171174
Acorus_calamus|C26343	Acorus_gramineus|C69710	1	0.429592	0.456724		2	324325
Acorus_calamus|C36471	Acorus_gramineus|C94114	14	0.466049	0.480316		2	360361
Acorus_calamus|C37323	Acorus_gramineus|C87996	20	0.450112	0.468673		3	17,20,22
Acorus_calamus|C75493	Acorus_gramineus|scaffold17520	11	0.0476265	0.0608896		7	90,92,95,98,98,101,104
Acorus_calamus|C91165	Acorus_gramineus|C225485	5	0.0858321	0.106997		7	90,92,95,98,98,101,104
Acorus_calamus|C98052	Acorus_gramineus|C179167	6	0.0175281	0.0257712		13	74,77,80,86,92,95,98,98,101,104,110,116,116
Acorus_calamus|C100482	Acorus_gramineus|C215908	9	0.0303796	0.0409113		6	9.81011e+16
Acorus_calamus|C108400	Acorus_gramineus|C153725	5	0.398264	0.427922		2	2,3
Acorus_calamus|C111432	Acorus_gramineus|C190204	29	0.00113106	0.00200416		18	89,91,92,94,95,98,101,102,103,104,108,109,110,113,116,119,120,122
Acorus_calamus|C111552	Acorus_gramineus|scaffold14455	9	6.45971e-07	4.54036e-06		18	91,92,94,94,95,98,101,102,103,104,108,109,110,113,116,119,120,122
Acorus_calamus|C113091	Acorus_gramineus|C226449	8	0.000181845	0.000417417		23	91,92,94,95,98,101,102,103,104,107,108,109,110,113,116,119,120,122,125,128,131,134,134
Acorus_calamus|C115247	Acorus_gramineus|C272325	10	4.82682e-07	4.06257e-06		21	89,92,94,95,95,98,101,102,103,104,108,109,110,113,116,119,120,122,128,131,134
Acorus_calamus|C115279	Acorus_gramineus|C268541	15	0.000119513	0.0002874		14	1.02103e+41
Acorus_calamus|C119005	Acorus_gramineus|C202227	5	0.000273717	0.000614342		14	1.02103e+41
Acorus_calamus|C122379	Acorus_gramineus|scaffold15473	14	2.84385e-06	1.59571e-05		11	2.52253e+32
Acorus_calamus|C123391	Acorus_gramineus|C242943	6	0.000342692	0.000720125		7	2.57258e+20
Acorus_calamus|C123417	Acorus_gramineus|scaffold2654	3	4.74691e-05	0.000122933		13	1.02103e+38
Acorus_calamus|C123603	Acorus_gramineus|scaffold10281	4	0.0016562	0.0028352		7	2.57258e+20
Acorus_calamus|C124417	Acorus_gramineus|C231871	7	1.77681e-05	5.60806e-05		15	1.02103e+44
Acorus_calamus|C125121	Acorus_gramineus|scaffold7186	5	0.00196416	0.00330634		8	2.58259e+23
Acorus_calamus|C125559	Acorus_gramineus|C204067	5	0.000368336	0.000744039		8	2.58259e+23
Acorus_calamus|C131732	Acorus_gramineus|C91412	5	0.00714905	0.0112821		8	2.58259e+23
Acorus_calamus|C131788	Acorus_gramineus|C245751	11	0.000162185	0.000380947		14	1.02103e+41
Acorus_calamus|C133042	Acorus_gramineus|scaffold10688	9	0.000293895	0.00064529		15	1.02103e+44
Acorus_calamus|C134972	Acorus_gramineus|C271659	10	2.07932e-07	1.90919e-06		16	1.02103e+47
Acorus_calamus|C137048	Acorus_gramineus|C202751	14	5.22281e-06	2.29349e-05		13	1.02103e+38
Acorus_calamus|C137384	Acorus_gramineus|C212352	5	1.77039e-05	5.60806e-05		14	1.02103e+41
Acorus_calamus|C141382	Acorus_gramineus|C197675	8	0.000644032	0.00120458		15	1.02103e+44
Acorus_calamus|C144446	Acorus_gramineus|C230897	4	0.000736602	0.00132851		15	1.02103e+44
Acorus_calamus|C145124	Acorus_gramineus|scaffold14004	8	3.18002e-06	1.64721e-05		13	1.02103e+38
Acorus_calamus|C146132	Acorus_gramineus|C226471	5	4.37337e-06	2.00777e-05		14	1.02103e+41
Acorus_calamus|C147028	Acorus_gramineus|scaffold13225	11	3.64674e-08	4.93145e-07		15	1.02103e+44
Acorus_calamus|C149668	Acorus_gramineus|scaffold12172	33	7.81579e-07	4.6435e-06		25	74,75,76,80,83,84,85,86,90,91,92,94,95,107,108,113,116,117,118,119,122,123,124,125,128
Acorus_calamus|C150894	Acorus_gramineus|C238452	12	1.36568e-05	4.75633e-05		13	1.07108e+38
Acorus_calamus|C151416	Acorus_gramineus|C74268	5	0.0184641	0.0266411		4	216216217217
Acorus_calamus|C151432	Acorus_gramineus|C243241	8	0.000488437	0.000930795		14	1.05106e+41
Acorus_calamus|C152314	Acorus_gramineus|C164451	7	0.000450964	0.000875912		16	94,95,96,97,107,108,113,116,117,118,119,122,123,124,125,128
Acorus_calamus|C153152	Acorus_gramineus|C233789	6	0.00146603	0.00255292		12	1.07108e+35
Acorus_calamus|C154514	Acorus_gramineus|C247393	7	8.30045e-08	8.38345e-07		15	1.07108e+44
Acorus_calamus|C154656	Acorus_gramineus|C103267	2	0.00258652	0.0042826		14	1.07107e+41
Acorus_calamus|C155036	Acorus_gramineus|C233591	7	1.55272e-05	5.2275e-05		17	93,94,95,101,107,108,113,116,117,118,119,122,123,124,125,128,128
Acorus_calamus|C155794	Acorus_gramineus|C252601	7	9.18055e-06	3.43421e-05		16	94,95,99,104,107,108,113,116,117,118,119,122,123,124,125,128
Acorus_calamus|C155954	Acorus_gramineus|C223597	5	0.000416448	0.000824731		9	1.16116e+26
Acorus_calamus|C156950	Acorus_gramineus|scaffold2695	8	4.37581e-05	0.000116304		13	1.07108e+38
Acorus_calamus|C156954	Acorus_gramineus|C222777	1	0.017606	0.0257712		10	1.16117e+29
Acorus_calamus|C159232	Acorus_gramineus|C231313	11	7.77414e-07	4.6435e-06		14	1.04107e+41
Acorus_calamus|C159402	Acorus_gramineus|scaffold15446	7	2.82994e-05	7.93955e-05		13	1.07108e+38
Acorus_calamus|C161901	Acorus_gramineus|scaffold6711	11	3.91861e-05	0.000106967		13	1.07108e+38
Acorus_calamus|C162647	Acorus_gramineus|C245957	6	3.9061e-08	4.93145e-07		13	1.07108e+38
Acorus_calamus|C163367	Acorus_gramineus|scaffold8152	16	1.11401e-05	4.01838e-05		10	1.13116e+29
Acorus_calamus|C166177	Acorus_gramineus|C248375	10	1.92886e-05	5.90348e-05		10	1.13116e+29
Acorus_calamus|C166761	Acorus_gramineus|scaffold12094	8	4.19961e-06	2.00777e-05		11	1.13116e+32
Acorus_calamus|C166779	Acorus_gramineus|C239260	16	8.20937e-08	8.38345e-07		11	1.13116e+32
Acorus_calamus|C167237	Acorus_gramineus|C260661	10	2.05442e-05	6.10285e-05		10	1.13116e+29
Acorus_calamus|C169221	Acorus_gramineus|scaffold16007	28	7.57585e-11	2.55053e-09		15	5,6,7,9,11,15,16,17,18,19,20,21,22,23,24
Acorus_calamus|C169363	Acorus_gramineus|C256171	11	0.000349367	0.000720125		6	20,21,22,23,24,25
Acorus_calamus|C169621	Acorus_gramineus|scaffold15821	8	0.00736891	0.0114502		4	21,22,23,24
Acorus_calamus|C170069	Acorus_gramineus|C247225	10	0.00351008	0.00571804		4	21,22,23,24
Acorus_calamus|C170812	Acorus_gramineus|C247723	7	0.0233868	0.0323571		4	21,22,23,24
Acorus_calamus|C172026	Acorus_gramineus|C214176	12	0.0408595	0.0529078		3	22,23,24
Acorus_calamus|C176522	Acorus_gramineus|C240880	15	0.00010774	0.000265409		7	4.35438e+20
Acorus_calamus|C176724	Acorus_gramineus|scaffold13366	29	0.00066648	0.0012239		26	6,17,22,30,32,33,34,42,49,67,70,90,94,105,141,151,152,156,169,175,190,198,216,217,220,226
Acorus_calamus|C178982	Acorus_gramineus|C217887	23	0.0042584	0.00682696		8	1.6817e+23
Acorus_calamus|C179418	Acorus_gramineus|C276823	116	3.2618e-06	1.64721e-05		53	5.22526e+158
Acorus_calamus|C179580	Acorus_gramineus|scaffold13895	7	0.127734	0.151778		5	651652653654655
Acorus_calamus|C180534	Acorus_gramineus|C262355	11	0.0233726	0.0323571		53	5.22526e+158
Acorus_calamus|C182080	Acorus_gramineus|scaffold12189	18	3.50414e-09	7.07836e-08		80	399,401,402,403,405,422,426,432,433,437,444,446,447,450,451,456,465,466,470,482,483,484,489,491,502,512,516,522,525,528,529,531,532,533,536,539,546,548,549,554,564,565,568,569,574,575,578,581,583,585,588,590,591,592,597,598,599,605,609,611,612,623,626,627,628,636,639,642,648,651,652,653,654,655,660,663,665,668,670,671
Acorus_calamus|C182214	Acorus_gramineus|C175485	6	0.231211	0.256619		5	651652653654655
Acorus_calamus|C182884	Acorus_gramineus|scaffold15315	14	0.0153805	0.0235369		53	5.22526e+158
Acorus_calamus|C183342	Acorus_gramineus|scaffold13651	21	1.11652e-10	2.81922e-09		82	432,433,434,437,444,446,447,450,451,456,458,465,466,470,470,475,482,482,483,484,489,491,502,512,516,522,525,528,529,531,532,533,536,539,546,547,548,549,554,564,565,568,569,574,575,578,581,583,585,588,590,591,592,597,598,599,605,605,609,611,612,623,626,627,628,636,639,642,648,651,652,653,654,655,656,660,663,665,668,668,670,671
Acorus_calamus|C183500	Acorus_gramineus|scaffold12377	12	0.0337479	0.0448492		13	6.51653e+38
Acorus_calamus|C184808	Acorus_gramineus|scaffold12348	12	0.0176038	0.0257712		13	6.51653e+38
Acorus_calamus|C185668	Acorus_gramineus|C251383	12	0.000316704	0.000680577		57	5.22526e+170
Acorus_calamus|C186769	Acorus_gramineus|C271765	34	2.73436e-17	1.38085e-15		86	432,433,437,444,446,447,450,451,456,464,465,466,470,473,476,482,483,484,489,491,502,512,516,522,524,525,528,529,531,532,533,536,539,545,546,546,548,549,554,564,565,568,569,574,575,578,578,581,583,585,588,590,591,592,596,597,598,599,599,605,609,611,612,617,623,626,627,628,634,636,639,642,644,648,651,652,653,654,655,660,663,665,665,668,670,671
Acorus_calamus|C187009	Acorus_gramineus|scaffold1950	6	2.26825e-05	6.54553e-05		63	5.22525e+188
Acorus_calamus|C187739	Acorus_gramineus|C201259	8	0.0877455	0.106997		5	596597598599599
Acorus_calamus|C189801	Acorus_gramineus|scaffold8696	54	8.51737e-26	8.60255e-24		76	482,483,484,489,491,491,502,512,516,522,525,528,529,530,531,532,533,536,536,539,539,546,548,549,554,564,565,568,569,572,574,575,578,581,583,584,585,588,590,591,592,596,597,598,599,599,605,609,611,611,612,614,623,626,627,628,636,639,642,644,647,648,651,652,653,653,654,655,660,663,665,668,670,671,677,680
Gene1	Gene2	NumDiffs	Pvalue	FDRCorrectedPValue	NumRes_ClusterwHighP	ClusterLen_FracTotalLength	Coords
Calycanthus_chinensis|scaffold2675	Calycanthus_occidentalis|scaffold20873	7	0.134841	0.145018		5	194218240255286
Calycanthus_chinensis|scaffold4582	Calycanthus_occidentalis|C374254	11	0.0266974	0.0330816		2	597598
Calycanthus_chinensis|scaffold7167	Calycanthus_occidentalis|scaffold21806	14	0.0086328	0.0113119		5	291294319321328
Calycanthus_chinensis|scaffold7918	Calycanthus_occidentalis|C370221	10	0.0534221	0.0614621		2	508510
Calycanthus_chinensis|scaffold8066	Calycanthus_occidentalis|C374712	13	0.0908436	0.0986301		2	140141
Calycanthus_chinensis|scaffold8804	Calycanthus_occidentalis|scaffold14788	7	0.0374875	0.0454636		6	1.41176e+17
Calycanthus_chinensis|scaffold9571	Calycanthus_occidentalis|C385374	10	0.0638291	0.0713384		5	140157198244252
Calycanthus_chinensis|scaffold9847	Calycanthus_occidentalis|scaffold20403	11	0.0195503	0.0247637		4	223239244252
Calycanthus_chinensis|scaffold10684	Calycanthus_occidentalis|scaffold21882	6	0.049596	0.0582881		13	2.44252e+38
Calycanthus_chinensis|scaffold10686	Calycanthus_occidentalis|C360545	6	0.222364	0.236911		2	244252
Calycanthus_chinensis|scaffold11262	Calycanthus_occidentalis|C371923	6	0.0539142	0.0614621		3	337342348
Calycanthus_chinensis|scaffold12859	Calycanthus_occidentalis|scaffold3505	12	0.0518399	0.0603036		2	678680
Calycanthus_chinensis|scaffold13327	Calycanthus_occidentalis|C349463	9	0.046971	0.0557781		2	510511
Calycanthus_chinensis|scaffold13404	Calycanthus_occidentalis|scaffold335	30	0.00719304	0.00976198		9	1.19121e+26
Calycanthus_chinensis|scaffold13506	Calycanthus_occidentalis|scaffold16673	6	0.981684	0.990372		2	2,3
Calycanthus_chinensis|scaffold14923	Calycanthus_occidentalis|scaffold12737	16	0.00117628	0.00194343		20	1.26131e+59
Calycanthus_chinensis|scaffold15769	Calycanthus_occidentalis|scaffold21215	8	4.61017e-10	6.5695e-09		22	1.26131e+65
Calycanthus_chinensis|scaffold16391	Calycanthus_occidentalis|C360351	7	7.07036e-10	7.76672e-09		26	1.26131e+77
Calycanthus_chinensis|scaffold16618	Calycanthus_occidentalis|scaffold18235	15	1.56058e-07	6.35379e-07		17	1.31133e+50
Calycanthus_chinensis|scaffold16637	Calycanthus_occidentalis|C363385	7	2.23379e-05	5.30524e-05		15	1.28131e+44
Calycanthus_chinensis|scaffold16751	Calycanthus_occidentalis|C368089	6	0.00529976	0.00727919		14	1.31133e+41
Calycanthus_chinensis|scaffold17008	Calycanthus_occidentalis|scaffold21223	8	2.29538e-05	5.34027e-05		18	1.31133e+53
Calycanthus_chinensis|scaffold18036	Calycanthus_occidentalis|C376534	6	2.45455e-07	9.20222e-07		16	1.31133e+47
Calycanthus_chinensis|scaffold18079	Calycanthus_occidentalis|C347109	8	0.0035287	0.00502595		7	1.31133e+20
Calycanthus_chinensis|scaffold18314	Calycanthus_occidentalis|C376578	7	7.13615e-07	2.25978e-06		16	1.19131e+47
Calycanthus_chinensis|scaffold18841	Calycanthus_occidentalis|C382128	8	4.87296e-05	0.000103425		14	1.31133e+41
Calycanthus_chinensis|scaffold18857	Calycanthus_occidentalis|C370487	9	8.82387e-05	0.000176477		15	1.31133e+44
Calycanthus_chinensis|scaffold18877	Calycanthus_occidentalis|C373984	9	3.76937e-05	8.26362e-05		15	1.31133e+44
Calycanthus_chinensis|scaffold18937	Calycanthus_occidentalis|C377452	8	1.06311e-05	2.63467e-05		16	1.11123e+47
Calycanthus_chinensis|scaffold19028	Calycanthus_occidentalis|C382132	13	7.04038e-07	2.25978e-06		14	1.31133e+41
Calycanthus_chinensis|C155957	Calycanthus_occidentalis|C349875	22	0.0579395	0.065397		4	14,15,16,17
Calycanthus_chinensis|C180595	Calycanthus_occidentalis|scaffold12210	7	0.083378	0.0913951		5	69,71,73,74,76
Calycanthus_chinensis|C181305	Calycanthus_occidentalis|C184368	4	0.647224	0.670759		4	69,71,73,74
Calycanthus_chinensis|C201866	Calycanthus_occidentalis|scaffold10175	14	0.0243733	0.0305336		14	65,69,71,74,76,83,87,88,89,93,95,101,102,104
Calycanthus_chinensis|C235234	Calycanthus_occidentalis|C214967	26	0.0674088	0.0746078		7	1.10111e+20
Calycanthus_chinensis|C235360	Calycanthus_occidentalis|C365711	23	0.442319	0.462609		7	11,12,13,15,16,17,18
Calycanthus_chinensis|C241713	Calycanthus_occidentalis|C190152	31	0.00797862	0.0107007		11	53,56,57,58,59,60,62,65,68,71,74
Calycanthus_chinensis|C262233	Calycanthus_occidentalis|scaffold8552	13	0.00138124	0.00221777		19	9.81001e+55
Calycanthus_chinensis|C272688	Calycanthus_occidentalis|C366679	2	2.99869e-05	6.70296e-05		20	9.81001e+58
Calycanthus_chinensis|C276544	Calycanthus_occidentalis|C382306	10	7.89923e-05	0.000160806		10	1.38139e+29
Calycanthus_chinensis|C279964	Calycanthus_occidentalis|C330497	6	6.62208e-05	0.000137258		10	1.3914e+29
Calycanthus_chinensis|C281218	Calycanthus_occidentalis|C294234	10	0.00235691	0.00358251		10	1.29132e+29
Calycanthus_chinensis|C281302	Calycanthus_occidentalis|C117323	0	0.0367374	0.0450329		4	147147148149
Calycanthus_chinensis|C292165	Calycanthus_occidentalis|scaffold8825	6	0.000122576	0.000232895		14	1.2913e+41
Calycanthus_chinensis|C309166	Calycanthus_occidentalis|C252928	7	0.0100487	0.0128713		11	1.40142e+32
Calycanthus_chinensis|C316503	Calycanthus_occidentalis|C322972	4	2.74465e-05	6.25781e-05		21	9.81001e+61
Calycanthus_chinensis|C316507	Calycanthus_occidentalis|scaffold19215	5	9.42862e-05	0.000185321		25	67,68,71,74,78,92,98,100,107,114,117,119,129,132,140,142,147,147,148,149,152,158,161,164,165
Calycanthus_chinensis|C325295	Calycanthus_occidentalis|C273788	6	0.000200001	0.000373772		13	1.40142e+38
Calycanthus_chinensis|C325537	Calycanthus_occidentalis|C320592	4	0.00186791	0.00291701		12	1.40142e+35
Calycanthus_chinensis|C333333	Calycanthus_occidentalis|C377880	30	0.283984	0.299761		9	26,27,28,29,30,31,32,33,34
Calycanthus_chinensis|C336677	Calycanthus_occidentalis|C346525	3	0.968078	0.985365		2	6,6
Calycanthus_chinensis|C337851	Calycanthus_occidentalis|C204118	0	0.873393	0.896998		2	6,6
Calycanthus_chinensis|C338529	Calycanthus_occidentalis|scaffold19047	7	2.51895e-16	1.4358e-14		24	11,12,13,14,15,20,21,23,24,26,27,28,29,30,31,32,33,33,34,36,37,38,40,41
Calycanthus_chinensis|C340175	Calycanthus_occidentalis|scaffold2255	7	8.29335e-18	9.45442e-16		24	11,12,13,14,15,20,21,23,24,26,27,28,28,29,30,31,32,33,34,36,37,38,40,41
Calycanthus_chinensis|C340989	Calycanthus_occidentalis|C332661	7	3.53027e-10	5.74929e-09		23	11,12,13,14,15,20,21,23,24,26,27,28,29,30,31,32,33,34,36,37,38,40,41
Calycanthus_chinensis|C344701	Calycanthus_occidentalis|C346317	5	1.83688e-12	5.2351e-11		23	11,12,13,14,15,20,21,23,24,26,27,28,29,30,31,32,33,34,36,37,38,40,41
Calycanthus_chinensis|C345415	Calycanthus_occidentalis|C341031	4	4.61301e-12	1.05177e-10		23	11,12,13,14,15,20,21,23,24,26,27,28,29,30,31,32,33,34,36,37,38,40,41
Calycanthus_chinensis|C346142	Calycanthus_occidentalis|scaffold7818	8	1.16319e-15	4.42014e-14		22	12,13,14,15,20,21,23,24,26,27,28,29,30,31,32,33,34,36,37,38,40,41
Calycanthus_chinensis|C346882	Calycanthus_occidentalis|C320272	7	1.30945e-09	1.14829e-08		23	12,13,14,15,20,21,23,24,26,27,28,29,30,31,32,33,34,36,37,38,39,40,41
Calycanthus_chinensis|C349945	Calycanthus_occidentalis|C346487	20	3.57335e-07	1.27301e-06		11	30,31,32,33,34,36,37,38,40,40,41
Calycanthus_chinensis|C350541	Calycanthus_occidentalis|scaffold20615	6	0.994296	0.994297		2	5,6
Calycanthus_chinensis|C351463	Calycanthus_occidentalis|C375398	2	0.0012386	0.00201715		10	30,31,32,33,34,36,37,38,40,41
Calycanthus_chinensis|C353551	Calycanthus_occidentalis|C335543	13	4.99215e-07	1.67384e-06		10	30,31,32,33,34,36,37,38,40,41
Calycanthus_chinensis|C354317	Calycanthus_occidentalis|C357321	7	7.58835e-09	4.80596e-08		10	30,31,32,33,34,36,37,38,40,41
Calycanthus_chinensis|C355573	Calycanthus_occidentalis|C331021	6	4.27907e-06	1.10867e-05		10	30,31,32,33,34,36,37,38,40,41
Calycanthus_chinensis|C357035	Calycanthus_occidentalis|C355683	7	8.69428e-07	2.60828e-06		10	30,31,32,33,34,36,37,38,40,41
Calycanthus_chinensis|C358365	Calycanthus_occidentalis|C346905	5	1.5698e-06	4.3648e-06		10	30,31,32,33,34,36,37,38,40,41
Calycanthus_chinensis|C359753	Calycanthus_occidentalis|C346053	6	7.59353e-08	3.46265e-07		10	30,31,32,33,34,36,37,38,40,41
Calycanthus_chinensis|C359947	Calycanthus_occidentalis|C283167	7	3.21877e-06	8.73667e-06		11	30,31,31,32,33,34,36,37,38,40,41
Calycanthus_chinensis|C362844	Calycanthus_occidentalis|scaffold18435	19	9.26534e-09	5.5592e-08		12	30,31,32,33,34,36,37,38,39,40,40,41
Calycanthus_chinensis|C363762	Calycanthus_occidentalis|C356073	6	3.9683e-06	1.05206e-05		10	30,31,32,33,34,36,37,38,40,41
Calycanthus_chinensis|C364464	Calycanthus_occidentalis|C356813	6	2.50236e-07	9.20222e-07		10	30,31,32,33,34,36,37,38,40,41
Calycanthus_chinensis|C365126	Calycanthus_occidentalis|C340199	13	1.37203e-06	3.91027e-06		10	30,31,32,33,34,36,37,38,40,41
Calycanthus_chinensis|C365172	Calycanthus_occidentalis|C369689	15	2.63524e-10	5.00695e-09		11	30,31,32,33,34,36,37,38,40,40,41
Calycanthus_chinensis|C365320	Calycanthus_occidentalis|scaffold18290	10	3.71987e-07	1.28504e-06		10	30,31,32,33,34,36,37,38,40,41
Calycanthus_chinensis|C368108	Calycanthus_occidentalis|C350357	14	6.89403e-08	3.27466e-07		10	30,31,32,33,34,36,37,38,40,41
Calycanthus_chinensis|C368178	Calycanthus_occidentalis|C365589	10	7.12956e-10	7.76672e-09		11	28,30,31,32,33,34,36,37,38,40,41
Calycanthus_chinensis|C368612	Calycanthus_occidentalis|C357887	9	2.88832e-08	1.49668e-07		10	30,31,32,33,34,36,37,38,40,41
Calycanthus_chinensis|C369610	Calycanthus_occidentalis|scaffold18979	8	3.43549e-09	2.3038e-08		10	30,31,32,33,34,36,37,38,40,41
Calycanthus_chinensis|C369882	Calycanthus_occidentalis|scaffold14898	7	8.16063e-07	2.51436e-06		10	30,31,32,33,34,36,37,38,40,41
Calycanthus_chinensis|C370332	Calycanthus_occidentalis|scaffold21659	8	3.44527e-08	1.70765e-07		10	30,31,32,33,34,36,37,38,40,41
Calycanthus_chinensis|C372740	Calycanthus_occidentalis|scaffold5919	7	2.05037e-08	1.11306e-07		10	30,31,32,33,34,36,37,38,40,41
Calycanthus_chinensis|C373724	Calycanthus_occidentalis|scaffold17796	9	3.04177e-09	2.3038e-08		11	30,31,32,33,34,36,37,38,40,40,41
Calycanthus_chinensis|C373794	Calycanthus_occidentalis|scaffold19425	6	1.7675e-09	1.43925e-08		10	30,31,32,33,34,36,37,38,40,41
Calycanthus_chinensis|C374258	Calycanthus_occidentalis|C359119	6	5.38562e-06	1.36436e-05		10	30,31,32,33,34,36,37,38,40,41
Calycanthus_chinensis|C374509	Calycanthus_occidentalis|scaffold16265	8	1.47386e-08	8.40102e-08		10	30,31,32,33,34,36,37,38,40,41
Calycanthus_chinensis|C374911	Calycanthus_occidentalis|C366333	16	8.98165e-10	8.53257e-09		11	30,31,32,33,34,36,37,38,40,41,43
Calycanthus_chinensis|C375190	Calycanthus_occidentalis|C369001	11	3.31926e-09	2.3038e-08		10	30,31,32,33,34,36,37,38,40,41
Calycanthus_chinensis|C375200	Calycanthus_occidentalis|C355085	13	7.49421e-10	7.76672e-09		11	30,31,32,33,34,36,37,38,40,41,42
Calycanthus_chinensis|C375308	Calycanthus_occidentalis|C345997	13	1.80523e-07	7.09644e-07		10	30,31,32,33,34,36,37,38,40,41
Calycanthus_chinensis|C376134	Calycanthus_occidentalis|C356933	6	8.37273e-08	3.67112e-07		10	30,31,32,33,34,36,37,38,40,41
Calycanthus_chinensis|C376186	Calycanthus_occidentalis|C367835	35	0.00813606	0.010785		8	4.66468e+23
Calycanthus_chinensis|C377511	Calycanthus_occidentalis|C375992	11	0.00222224	0.00342346		8	3.18319e+23
Calycanthus_chinensis|C377799	Calycanthus_occidentalis|C368701	9	0.00245008	0.00360564		9	4.66468e+26
Calycanthus_chinensis|C379125	Calycanthus_occidentalis|C381114	14	4.89908e-05	0.000103425		29	3.30335e+86
Calycanthus_chinensis|C379241	Calycanthus_occidentalis|C373604	13	0.000757499	0.00128888		21	3.04313e+62
Calycanthus_chinensis|C379869	Calycanthus_occidentalis|C376082	6	0.00300352	0.00433419		4	343345345346
Calycanthus_chinensis|C380067	Calycanthus_occidentalis|scaffold13734	10	0.00171365	0.00271328		9	4.66468e+26
Calycanthus_chinensis|C380229	Calycanthus_occidentalis|scaffold15312	7	1.25297e-06	3.66253e-06		23	3.30335e+68
Calycanthus_chinensis|C380614	Calycanthus_occidentalis|C388142	7	1.21473e-07	5.12886e-07		31	3.30335e+92
Calycanthus_chinensis|C381698	Calycanthus_occidentalis|C377980	13	0.000454621	0.0008137		10	4.53455e+29
Calycanthus_chinensis|C383904	Calycanthus_occidentalis|scaffold3210	12	2.07005e-05	5.02098e-05		11	4.50455e+32
Calycanthus_chinensis|C384036	Calycanthus_occidentalis|C374166	9	0.00246701	0.00360564		9	4.55466e+26
Calycanthus_chinensis|C384656	Calycanthus_occidentalis|scaffold15167	10	0.000491873	0.00086267		21	3.30335e+62
Calycanthus_chinensis|C384710	Calycanthus_occidentalis|scaffold21049	27	0.00357107	0.00502595		4	499501503507
Calycanthus_chinensis|C385778	Calycanthus_occidentalis|scaffold4390	10	0.00878184	0.0113765		6	4.99502e+17
Calycanthus_chinensis|C385796	Calycanthus_occidentalis|C361563	8	0.000118577	0.000229115		6	4.99502e+17
Calycanthus_chinensis|C386450	Calycanthus_occidentalis|C376680	15	0.000960868	0.00161087		16	4.70475e+47
Calycanthus_chinensis|C389395	Calycanthus_occidentalis|C380976	8	0.000587454	0.00101469		17	4.70475e+50
Calycanthus_chinensis|C391414	Calycanthus_occidentalis|C384092	8	0.000293068	0.000538866		18	4.70475e+53
Calycanthus_chinensis|C392068	Calycanthus_occidentalis|C384854	19	0.000456814	0.0008137		19	4.99501e+56
Calycanthus_chinensis|C392322	Calycanthus_occidentalis|C391684	16	0.00485256	0.00674624		16	4.99504e+47
Calycanthus_chinensis|C393482	Calycanthus_occidentalis|scaffold6909	7	0.00242261	0.00360564		7	6.02613e+20
Calycanthus_chinensis|C393766	Calycanthus_occidentalis|scaffold6374	7	0.0456533	0.0547839		3	499503507
Gene1	Gene2	NumDiffs	Pvalue	FDRCorrectedPValue	NumRes_ClusterwHighP	ClusterLen_FracTotalLength	Coords
Campsis_grandiflora|scaffold1371	Campsis_radicans|scaffold4233	6	0.301241	0.309972		4	247296348387
Campsis_grandiflora|scaffold6221	Campsis_radicans|scaffold20731	6	0.00716893	0.011568		5	61,65,81,97,110
Campsis_grandiflora|scaffold7763	Campsis_radicans|scaffold4791	2	0.0303142	0.0417136		3	81,97,110
Campsis_grandiflora|scaffold8474	Campsis_radicans|scaffold15970	8	0.0308715	0.0417136		7	2.2925e+20
Campsis_grandiflora|scaffold9861	Campsis_radicans|scaffold9599	8	9.94454e-05	0.000294193		7	1.91192e+20
Campsis_grandiflora|scaffold12053	Campsis_radicans|scaffold6134	10	0.000634232	0.00152632		9	3.31333e+26
Campsis_grandiflora|scaffold13258	Campsis_radicans|C349674	9	0.048676	0.0606315		7	2.03218e+20
Campsis_grandiflora|scaffold15536	Campsis_radicans|scaffold22182	6	0.0728997	0.0862646		4	24,48,52,86
Campsis_grandiflora|scaffold15789	Campsis_radicans|C249343	5	0.0872782	0.101586		2	64,65
Campsis_grandiflora|scaffold16506	Campsis_radicans|C339190	8	0.0139691	0.0211022		5	715724744782788
Campsis_grandiflora|scaffold19781	Campsis_radicans|scaffold1292	6	0.0458162	0.0591445		4	235264295318
Campsis_grandiflora|scaffold20025	Campsis_radicans|scaffold14164	3	0.00350901	0.00622849		3	204205206
Campsis_grandiflora|scaffold20313	Campsis_radicans|scaffold14018	10	5.45836e-07	2.98111e-06		10	1.3814e+29
Campsis_grandiflora|scaffold20898	Campsis_radicans|scaffold10143	4	2.11704e-05	8.35054e-05		6	1.43144e+17
Campsis_grandiflora|scaffold22178	Campsis_radicans|C334214	6	0.00183047	0.00361009		4	145147148151
Campsis_grandiflora|scaffold22519	Campsis_radicans|C327720	6	0.000842196	0.00186862		6	1.45147e+17
Campsis_grandiflora|scaffold22911	Campsis_radicans|scaffold21103	3	6.89225e-05	0.000233024		6	1.45147e+17
Campsis_grandiflora|scaffold23014	Campsis_radicans|C259999	7	0.0154916	0.0229146		3	147148151
Campsis_grandiflora|scaffold24243	Campsis_radicans|scaffold19041	12	3.76583e-08	2.43067e-07		7	0,1,2,3,4,5,7
Campsis_grandiflora|scaffold24920	Campsis_radicans|C367468	7	0.00107997	0.0022617		8	1.16179e+23
Campsis_grandiflora|scaffold25031	Campsis_radicans|C336804	6	0.168576	0.187014		2	179184
Campsis_grandiflora|scaffold25671	Campsis_radicans|C283935	6	0.0317258	0.0417136		3	15,18,20
Campsis_grandiflora|scaffold25678	Campsis_radicans|scaffold23386	6	0.062479	0.0764829		2	175179
Campsis_grandiflora|scaffold26971	Campsis_radicans|scaffold21905	50	0.000353609	0.000965624		17	32,33,34,35,43,44,49,50,52,55,56,57,59,64,66,70,71
Campsis_grandiflora|scaffold27819	Campsis_radicans|C322950	14	0.00230875	0.00420311		10	11,12,13,15,16,17,18,20,21,23
Campsis_grandiflora|scaffold28476	Campsis_radicans|scaffold19775	12	6.34732e-05	0.00022533		24	52,55,56,57,59,64,66,70,71,79,86,95,98,107,108,113,116,128,131,140,158,162,163,164
Campsis_grandiflora|scaffold29366	Campsis_radicans|scaffold20366	6	1.46434e-05	6.11575e-05		23	52,55,56,57,59,64,66,70,71,77,86,95,98,107,113,116,128,131,140,158,162,163,164
Campsis_grandiflora|scaffold29483	Campsis_radicans|scaffold20972	6	1.42156e-13	2.43701e-12		38	52,55,56,57,59,64,66,70,71,86,95,98,107,113,116,126,128,131,140,158,162,163,164,191,203,209,236,239,242,257,304,306,308,311,323,326,329,332
Campsis_grandiflora|scaffold29516	Campsis_radicans|C303574	9	0.0037805	0.00654671		9	52,55,56,57,59,64,66,70,71
Campsis_grandiflora|scaffold30413	Campsis_radicans|C352158	8	1.98549e-06	1.00693e-05		40	52,55,56,57,59,64,66,70,71,86,95,98,107,113,116,128,131,140,158,162,163,164,191,203,209,236,239,242,257,304,306,307,308,311,321,323,326,327,329,332
Campsis_grandiflora|scaffold30550	Campsis_radicans|C317930	6	0.000724615	0.0016596		25	47,52,55,56,57,59,64,66,70,71,86,95,98,100,107,113,116,128,131,140,158,162,163,164,164
Campsis_grandiflora|scaffold31231	Campsis_radicans|C348680	6	2.83339e-05	0.000105879		25	38,41,52,55,56,57,59,64,66,70,71,86,95,98,106,107,113,116,128,131,140,158,162,163,164
Campsis_grandiflora|scaffold31279	Campsis_radicans|C314443	0	0.999985	0.999985		2	55,56
Campsis_grandiflora|scaffold32132	Campsis_radicans|C361016	6	6.80805e-11	5.3708e-10		40	52,55,56,57,59,64,66,70,71,86,95,98,107,110,111,113,116,128,129,131,140,158,162,163,164,191,203,209,236,239,242,257,304,306,308,311,323,326,329,332
Campsis_grandiflora|scaffold32269	Campsis_radicans|C351064	6	2.1771e-06	1.0305e-05		23	52,55,56,57,59,64,66,70,71,86,95,98,107,113,116,128,131,140,158,158,162,163,164
Campsis_grandiflora|scaffold32304	Campsis_radicans|scaffold16611	7	0.00108307	0.0022617		9	52,55,56,57,59,64,66,70,71
Campsis_grandiflora|C140805	Campsis_radicans|C254243	24	0.172671	0.18861		15	5,6,7,8,9,11,14,16,18,19,20,23,24,25,26
Campsis_grandiflora|C181330	Campsis_radicans|C296766	8	0.177117	0.190535		7	18,19,20,23,24,25,26
Campsis_grandiflora|C207746	Campsis_radicans|C258749	3	0.116382	0.133276		8	18,19,20,20,23,24,25,26
Campsis_grandiflora|C207864	Campsis_radicans|C304492	20	0.18232	0.193205		3	115116116
Campsis_grandiflora|C229932	Campsis_radicans|scaffold20234	15	0.0484943	0.0606315		7	1.25126e+20
Campsis_grandiflora|C293836	Campsis_radicans|C308269	14	0.125722	0.141687		11	1.15116e+32
Campsis_grandiflora|C359732	Campsis_radicans|C306944	19	0.2833	0.295799		4	71,72,73,74
Campsis_grandiflora|C383530	Campsis_radicans|C141611	25	0.0697051	0.0838824		6	42,43,44,45,46,47
Campsis_grandiflora|C395508	Campsis_radicans|C256851	6	0.0311745	0.0417136		6	42,43,44,45,46,47
Campsis_grandiflora|C398074	Campsis_radicans|C261925	6	0.00750069	0.0118344		6	42,43,44,45,46,47
Campsis_grandiflora|C398268	Campsis_radicans|C251779	23	0.0292201	0.0414925		4	162163164164
Campsis_grandiflora|C400636	Campsis_radicans|C326210	25	0.00641677	0.0105951		8	1.61162e+23
Campsis_grandiflora|C430844	Campsis_radicans|C355584	81	0.00767794	0.0118507		13	1.04105e+38
Campsis_grandiflora|C430994	Campsis_radicans|C316491	10	0.00140725	0.0028547		14	1.04105e+41
Campsis_grandiflora|C444700	Campsis_radicans|scaffold19136	5	0.000469453	0.0011904		14	1.04105e+41
Campsis_grandiflora|C444728	Campsis_radicans|C276147	0	0.00592173	0.0100106		14	1.04105e+41
Campsis_grandiflora|C445030	Campsis_radicans|C362474	4	9.0327e-05	0.000278836		14	1.04105e+41
Campsis_grandiflora|C445298	Campsis_radicans|scaffold15879	14	0.000644924	0.00152632		14	1.03104e+41
Campsis_grandiflora|C451194	Campsis_radicans|scaffold18302	6	8.23078e-05	0.00026563		76	37,38,41,44,50,53,54,56,59,69,70,71,74,77,80,83,92,104,105,107,108,109,110,111,116,117,119,120,121,122,132,134,136,140,161,163,164,173,176,184,185,188,193,194,197,198,199,199,200,203,209,212,227,230,233,248,254,255,256,257,260,263,272,272,279,281,282,282,284,286,287,289,290,292,293,297
Campsis_grandiflora|C461258	Campsis_radicans|scaffold2211	6	0.0165172	0.0239332		13	1.04105e+38
Campsis_grandiflora|C463390	Campsis_radicans|C295922	6	0.000158559	0.000450307		23	2.4825e+68
Campsis_grandiflora|C467246	Campsis_radicans|C342546	4	0.00224207	0.00418912		13	1.04105e+38
Campsis_grandiflora|C471222	Campsis_radicans|C333380	8	4.93203e-06	2.18859e-05		74	37,38,41,44,47,50,53,54,56,59,69,70,71,74,77,80,83,92,104,105,107,108,109,110,111,116,117,119,120,121,122,132,134,140,143,161,163,164,173,176,184,185,188,193,194,197,198,199,200,203,209,212,227,230,231,233,248,254,255,257,260,263,272,281,282,282,284,286,287,289,290,292,293,297
Campsis_grandiflora|C476104	Campsis_radicans|scaffold6170	24	0.984296	0.998358		2	2,3
Campsis_grandiflora|C478322	Campsis_radicans|C337666	6	2.38339e-08	1.69221e-07		77	13,14,19,20,21,22,22,23,24,25,26,29,30,32,33,35,36,37,38,70,71,74,77,80,83,92,104,105,107,108,109,110,111,116,117,119,120,121,122,132,134,140,161,163,164,165,173,176,184,185,188,193,194,197,198,199,200,203,209,212,227,230,233,248,254,255,257,260,263,272,281,282,284,287,289,290,293
Campsis_grandiflora|C485660	Campsis_radicans|C348626	10	2.46682e-12	2.50206e-11		77	21,22,23,24,25,26,29,30,32,33,35,36,37,38,70,71,74,77,80,83,92,104,105,107,108,109,110,111,116,117,119,120,121,122,126,132,134,140,159,161,163,164,173,176,184,185,188,193,194,197,198,198,199,200,203,209,210,212,227,230,233,248,254,255,255,257,260,263,270,272,281,282,284,287,289,290,293
Campsis_grandiflora|C485662	Campsis_radicans|C308241	1	0.000455839	0.0011904		14	21,22,23,24,25,26,29,30,32,33,35,36,37,38
Campsis_grandiflora|C485976	Campsis_radicans|C358638	10	1.41761e-13	2.43701e-12		80	21,22,23,24,25,26,29,30,32,33,35,36,37,38,70,71,74,75,77,80,83,92,104,105,107,107,108,109,109,110,111,116,117,119,120,121,122,132,134,140,161,163,164,173,176,184,185,188,193,194,197,198,199,200,203,209,212,227,229,230,230,232,233,234,236,240,248,254,255,257,260,263,272,281,282,284,287,289,290,293
Campsis_grandiflora|C486389	Campsis_radicans|C349130	9	3.22665e-12	2.86365e-11		74	21,22,23,24,25,26,29,30,30,32,33,35,36,37,38,70,71,74,77,80,83,92,104,105,107,108,109,109,110,111,116,117,119,120,121,122,132,134,140,159,161,163,164,173,176,184,185,188,193,194,197,198,199,200,203,209,212,227,230,233,248,254,255,257,260,263,272,281,282,284,287,289,290,293
Campsis_grandiflora|C488751	Campsis_radicans|C352372	8	1.71621e-13	2.43701e-12		74	21,22,23,24,25,26,29,30,32,33,35,36,37,38,70,71,74,77,80,83,85,92,104,105,107,108,109,110,111,116,117,119,120,121,122,132,134,140,161,163,164,171,173,176,184,185,188,193,194,197,198,199,200,203,209,212,227,230,233,248,254,255,257,260,262,263,272,281,282,284,287,289,290,293
Campsis_grandiflora|C489959	Campsis_radicans|C355788	14	0.00209146	0.00401334		13	1.04105e+38
Campsis_grandiflora|C490781	Campsis_radicans|C358892	18	2.42277e-12	2.50206e-11		64	32,33,35,36,37,38,70,71,74,77,80,83,92,104,105,107,108,109,110,111,116,117,119,120,121,122,132,134,140,161,163,164,173,176,184,185,188,193,194,197,198,199,200,203,209,212,227,230,233,248,254,255,257,260,263,272,281,282,284,286,287,289,290,293
Campsis_grandiflora|C492983	Campsis_radicans|scaffold19801	9	2.47666e-14	8.79215e-13		63	70,71,74,77,80,83,84,92,104,105,107,108,109,110,111,116,117,119,120,121,122,132,134,136,140,161,163,164,168,170,171,173,176,184,185,188,193,194,197,198,199,200,203,209,212,227,230,233,248,254,255,257,260,263,272,281,282,284,287,289,290,293,297
Campsis_grandiflora|C495131	Campsis_radicans|C346628	10	4.1738e-07	2.4695e-06		57	70,71,74,77,80,83,92,104,105,107,108,109,110,111,116,117,119,120,121,122,132,134,140,161,163,164,173,176,184,185,188,193,194,197,198,199,200,203,209,212,227,230,233,248,254,255,257,260,263,272,281,282,284,287,289,290,293
Campsis_grandiflora|C501207	Campsis_radicans|scaffold15248	13	4.94677e-22	3.51221e-20		66	32,33,35,36,37,38,66,70,71,74,77,80,83,85,92,104,105,107,108,109,110,111,116,117,119,120,121,122,132,134,140,161,163,164,173,176,184,185,188,193,194,197,198,199,200,203,209,212,227,230,233,248,254,255,257,260,263,272,277,281,282,284,287,289,290,293
Gene1	Gene2	NumDiffs	Pvalue	FDRCorrectedPValue	NumRes_ClusterwHighP	ClusterLen_FracTotalLength	Coords
Convallaria_majalis_1|scaffold1129	Convallaria_majalis|scaffold32382	1	1	1		0
Convallaria_majalis_1|scaffold1129	Convallaria_majalis|scaffold32382	1	1	1		0
Convallaria_majalis_1|scaffold2085	Convallaria_majalis|C814046	7	0.2228	0.268225		2	918952
Convallaria_majalis_1|scaffold2134	Convallaria_majalis|scaffold38877	2	0.658552	0.686223		2	918952
Convallaria_majalis_1|scaffold4926	Convallaria_majalis|scaffold19188	6	0.0938978	0.120034		4	15,21,39,59
Convallaria_majalis_1|scaffold6729	Convallaria_majalis|scaffold15517	1	0.262993	0.301955		4	21,39,59,71
Convallaria_majalis_1|scaffold9039	Convallaria_majalis|C805661	6	0.262971	0.301955		2	224240
Convallaria_majalis_1|scaffold9104	Convallaria_majalis|C333533	6	0.196232	0.238557		3	80,85,94
Convallaria_majalis_1|scaffold9139	Convallaria_majalis|C744009	8	0.0106894	0.0173028		6	31,36,37,38,43,50
Convallaria_majalis_1|scaffold11941	Convallaria_majalis|scaffold41017	3	0.0276497	0.0393092		4	37,38,43,50
Convallaria_majalis_1|scaffold12851	Convallaria_majalis|C766184	13	0.000375405	0.00103445		10	48,57,61,69,77,84,86,92,96,108
Convallaria_majalis_1|scaffold13091	Convallaria_majalis|C439891	0	0.0682113	0.0899808		8	57,61,69,77,84,86,92,96
Convallaria_majalis_1|scaffold13102	Convallaria_majalis|scaffold13990	21	0.000958183	0.0023297		18	6,8,10,12,13,17,23,24,25,26,27,28,29,34,37,38,41,42
Convallaria_majalis_1|scaffold14864	Convallaria_majalis|C812750	6	1.13053e-06	6.67551e-06		13	23,24,25,26,27,28,29,34,37,38,41,42,45
Convallaria_majalis_1|scaffold16531	Convallaria_majalis|scaffold44224	5	3.15157e-12	9.76988e-11		14	23,24,25,26,27,28,29,32,34,37,38,41,42,46
Convallaria_majalis_1|scaffold16934	Convallaria_majalis|C790467	4	1.60118e-07	1.32364e-06		12	23,24,25,26,27,28,29,34,37,38,41,42
Convallaria_majalis_1|scaffold17897	Convallaria_majalis|C659526	7	4.38785e-06	2.10116e-05		12	23,24,25,26,27,28,29,34,37,38,41,42
Convallaria_majalis_1|scaffold18612	Convallaria_majalis|scaffold36081	2	5.1515e-07	3.75756e-06		12	23,24,25,26,27,28,29,34,37,38,41,42
Convallaria_majalis_1|scaffold19902	Convallaria_majalis|C753675	8	1.01414e-06	6.28767e-06		11	24,25,26,27,28,29,34,37,38,41,42
Convallaria_majalis_1|scaffold20338	Convallaria_majalis|scaffold38038	5	6.98202e-07	4.55668e-06		13	24,25,26,27,28,29,32,34,35,37,38,41,42
Convallaria_majalis_1|scaffold22799	Convallaria_majalis|C637636	8	7.23494e-06	3.20404e-05		11	24,25,26,27,28,29,34,37,38,41,42
Convallaria_majalis_1|scaffold23179	Convallaria_majalis|C614945	7	4.40566e-06	2.10116e-05		13	17,19,24,25,26,27,28,29,34,37,38,41,42
Convallaria_majalis_1|scaffold23940	Convallaria_majalis|C645524	8	2.11966e-06	1.15274e-05		12	24,25,26,27,28,29,29,34,37,38,41,42
Convallaria_majalis_1|scaffold24015	Convallaria_majalis|C675823	11	4.9193e-07	3.75756e-06		11	27,28,29,31,34,37,37,38,41,42,42
Convallaria_majalis_1|scaffold24076	Convallaria_majalis|scaffold32056	26	0.000344725	0.000994091		25	2.51255e+74
Convallaria_majalis_1|scaffold25183	Convallaria_majalis|scaffold39237	6	9.0544e-05	0.000311874		17	3.75376e+50
Convallaria_majalis_1|scaffold25269	Convallaria_majalis|scaffold34853	22	0.0627534	0.0845807		4	277280284287
Convallaria_majalis_1|scaffold25517	Convallaria_majalis|scaffold31049	1	0.235539	0.275537		4	277280284287
Convallaria_majalis_1|scaffold25517	Convallaria_majalis|scaffold31049	1	0.235539	0.275537		4	277280284287
Convallaria_majalis_1|scaffold25653	Convallaria_majalis|C817836	12	2.20074e-06	1.15274e-05		9	2.39245e+26
Convallaria_majalis_1|scaffold26230	Convallaria_majalis|scaffold14624	8	0.000553757	0.00146097		7	2.62263e+20
Convallaria_majalis_1|scaffold27713	Convallaria_majalis|scaffold17366	8	0.00124158	0.00290484		7	2.62263e+20
Convallaria_majalis_1|scaffold29073	Convallaria_majalis|scaffold11103	5	0.0284591	0.0396508		6	2.62263e+17
Convallaria_majalis_1|scaffold30121	Convallaria_majalis|C515759	8	0.227988	0.271832		4	277280284287
Convallaria_majalis_1|scaffold30152	Convallaria_majalis|C802807	12	0.0107445	0.0173028		6	2.62263e+17
Convallaria_majalis_1|scaffold31020	Convallaria_majalis|scaffold27902	1	0.099151	0.125456		2	461461
Convallaria_majalis_1|scaffold31808	Convallaria_majalis|scaffold21408	19	0.00742673	0.0124448		12	2.71273e+35
Convallaria_majalis_1|scaffold32039	Convallaria_majalis|scaffold36267	6	0.00299031	0.00598062		9	2.71273e+26
Convallaria_majalis_1|scaffold32116	Convallaria_majalis|C593327	0	0.0860789	0.111185		9	2.71273e+26
Convallaria_majalis_1|scaffold32134	Convallaria_majalis|scaffold44170	50	0.000805488	0.00203838		8	26,27,28,30,32,33,35,38
Convallaria_majalis_1|scaffold32251	Convallaria_majalis|scaffold15868	8	0.00685626	0.0116463		10	3.43349e+29
Convallaria_majalis_1|scaffold32455	Convallaria_majalis|scaffold43179	14	0.000201512	0.000594941		37	2.14222e+110
Convallaria_majalis_1|scaffold34346	Convallaria_majalis|C634830	1	0.042698	0.0588284		4	362363365365
Convallaria_majalis_1|scaffold34529	Convallaria_majalis|C816750	13	2.56253e-05	9.62889e-05		35	1.65166e+104
Convallaria_majalis_1|scaffold34674	Convallaria_majalis|C771194	5	0.00171903	0.00380643		13	3.42343e+38
Convallaria_majalis_1|scaffold35072	Convallaria_majalis|scaffold33058	4	0.0147636	0.0228836		11	3.4935e+32
Convallaria_majalis_1|scaffold35531	Convallaria_majalis|scaffold43228	6	0.0118051	0.0186554		10	3.4935e+29
Convallaria_majalis_1|scaffold35903	Convallaria_majalis|C806575	7	2.23112e-06	1.15274e-05		37	2.14222e+110
Convallaria_majalis_1|scaffold36016	Convallaria_majalis|scaffold39690	6	0.996134	1		2	6,7
Convallaria_majalis_1|scaffold36023	Convallaria_majalis|C801799	10	6.78611e-06	3.11659e-05		37	2.05214e+110
Convallaria_majalis_1|scaffold36281	Convallaria_majalis|scaffold7801	5	0.00634504	0.0110815		5	423424424426429
Convallaria_majalis_1|scaffold36648	Convallaria_majalis|C791151	14	0.00137842	0.00316527		10	3.4935e+29
Convallaria_majalis_1|scaffold36656	Convallaria_majalis|C808983	4	5.20246e-08	4.6079e-07		40	1.0811e+119
Convallaria_majalis_1|scaffold36817	Convallaria_majalis|scaffold39310	9	4.43293e-08	4.22833e-07		40	1.0811e+119
Convallaria_majalis_1|scaffold37193	Convallaria_majalis|scaffold40949	8	3.17775e-09	4.92552e-08		42	1.0811e+125
Convallaria_majalis_1|scaffold37538	Convallaria_majalis|C814022	9	2.92457e-11	7.25292e-10		45	1.0811e+134
Convallaria_majalis_1|scaffold37579	Convallaria_majalis|C815596	7	9.71145e-09	1.20422e-07		41	1.0811e+122
Convallaria_majalis_1|scaffold37594	Convallaria_majalis|C815758	13	6.56336e-11	1.35643e-09		36	1.74179e+107
Convallaria_majalis_1|scaffold37760	Convallaria_majalis|scaffold1544	7	6.84555e-19	8.48848e-17		39	1.0811e+116
Convallaria_majalis_1|C198986	Convallaria_majalis|scaffold11695	0	0.391258	0.425579		3	349350351
Convallaria_majalis_1|C247669	Convallaria_majalis|C292431	0	0.344413	0.381315		3	349350351
Convallaria_majalis_1|C267929	Convallaria_majalis|scaffold40241	5	0.314261	0.354258		3	349350351
Convallaria_majalis_1|C277277	Convallaria_majalis|C470987	4	0.323884	0.361817		3	349350351
Convallaria_majalis_1|C283775	Convallaria_majalis|C599634	21	0.435958	0.470076		3	77,78,80
Convallaria_majalis_1|C370462	Convallaria_majalis|C552584	37	0.123152	0.152709		4	116117118119
Convallaria_majalis_1|C375829	Convallaria_majalis|C244795	1	0.2833	0.322287		4	116117118119
Convallaria_majalis_1|C397299	Convallaria_majalis|C291017	3	0.614771	0.64603		4	116117118119
Convallaria_majalis_1|C429614	Convallaria_majalis|scaffold1946	16	0.00140797	0.00317433		15	1.34135e+44
Convallaria_majalis_1|C442008	Convallaria_majalis|C691013	3	0.000829715	0.00205769		15	1.34135e+44
Convallaria_majalis_1|C443324	Convallaria_majalis|C517837	7	0.00479954	0.00888273		23	1.13115e+68
Convallaria_majalis_1|C458264	Convallaria_majalis|C811255	14	0.00264537	0.00537884		6	1.16116e+17
Convallaria_majalis_1|C461266	Convallaria_majalis|scaffold24582	7	0.00650582	0.0112045		6	1.16116e+17
Convallaria_majalis_1|C463074	Convallaria_majalis|scaffold22349	13	0.00366747	0.00710572		23	1.06108e+68
Convallaria_majalis_1|C466496	Convallaria_majalis|C662916	0	0.0252205	0.0367922		5	116117118118119
Convallaria_majalis_1|C471894	Convallaria_majalis|scaffold38667	31	0.576592	0.611089		7	29,30,31,32,33,34,35
Convallaria_majalis_1|C481529	Convallaria_majalis|C467411	10	0.00264604	0.00537884		24	20,21,22,23,26,27,29,30,31,32,33,34,35,39,40,41,44,45,48,50,51,53,56,56
Convallaria_majalis_1|C491643	Convallaria_majalis|C710438	8	0.000608591	0.00157219		17	20,21,22,23,27,29,30,31,32,33,34,35,39,40,41,44,45
Convallaria_majalis_1|C494423	Convallaria_majalis|scaffold7943	22	0.881824	0.911218		5	19,20,21,22,23
Convallaria_majalis_1|C495767	Convallaria_majalis|scaffold29692	7	4.52195e-05	0.000164918		20	17,19,20,21,22,23,25,26,27,28,30,32,33,35,38,39,40,41,44,45
Convallaria_majalis_1|C504935	Convallaria_majalis|C745649	4	7.82385e-06	3.34537e-05		23	17,19,20,21,22,23,25,26,27,28,30,32,33,35,38,39,40,41,44,45,48,51,53
Convallaria_majalis_1|C505117	Convallaria_majalis|C771124	3	0.0196587	0.0297277		24	19,20,21,22,23,25,26,27,28,30,32,33,35,38,39,40,41,44,45,47,48,51,53,53
Convallaria_majalis_1|C508185	Convallaria_majalis|C602554	0	0.000368797	0.00103445		25	17,19,20,21,22,23,25,26,27,28,30,32,33,35,38,39,40,41,44,45,47,48,51,53,53
Convallaria_majalis_1|C513873	Convallaria_majalis|C767454	2	0.000121171	0.000385263		21	17,19,20,21,21,22,23,25,26,27,28,30,32,33,35,38,39,40,41,44,45
Convallaria_majalis_1|C515171	Convallaria_majalis|C560289	36	0.0118853	0.0186554		10	44,45,47,49,50,52,53,54,55,56
Convallaria_majalis_1|C518738	Convallaria_majalis|C741425	2	0.984496	1		2	164164
Convallaria_majalis_1|C519782	Convallaria_majalis|C704660	16	0.00509375	0.00928861		9	1.52154e+26
Convallaria_majalis_1|C520078	Convallaria_majalis|C745093	4	0.00262264	0.00537884		9	1.52154e+26
Convallaria_majalis_1|C543565	Convallaria_majalis|C702423	17	0.138774	0.170376		4	83,84,85,86
Convallaria_majalis_1|C563193	Convallaria_majalis|C647024	1	0.123152	0.152709		4	83,84,85,86
Convallaria_majalis_1|C564127	Convallaria_majalis|C511635	8	0.0622682	0.0845807		15	1.07107e+44
Convallaria_majalis_1|C582742	Convallaria_majalis|C799349	23	0.00445457	0.0083692		13	1.04106e+38
Convallaria_majalis_1|C586070	Convallaria_majalis|scaffold29882	3	0.00334559	0.00658498		17	1.04106e+50
Convallaria_majalis_1|C589435	Convallaria_majalis|C465176	25	0.0840548	0.109714		10	1.22122e+29
Convallaria_majalis_1|C596103	Convallaria_majalis|C758699	21	0.0220353	0.0329202		15	1.14116e+44
Convallaria_majalis_1|C605431	Convallaria_majalis|C758918	8	0.00633351	0.0110815		16	1.14116e+47
Convallaria_majalis_1|C609533	Convallaria_majalis|C214445	14	0.387494	0.425214		2	137137
Convallaria_majalis_1|C611149	Convallaria_majalis|scaffold40110	7	0.000104576	0.000341249		18	1.13114e+53
Convallaria_majalis_1|C613495	Convallaria_majalis|C782807	2	0.0183576	0.028103		14	1.13114e+41
Convallaria_majalis_1|C614357	Convallaria_majalis|C736043	2	0.00428905	0.00818219		13	1.13114e+38
Convallaria_majalis_1|C615605	Convallaria_majalis|scaffold31041	6	0.547809	0.585589		2	137137
Convallaria_majalis_1|C621116	Convallaria_majalis|C769402	6	0.00015958	0.000482632		18	1.14116e+53
Convallaria_majalis_1|C621398	Convallaria_majalis|scaffold3169	46	0.000453788	0.00122325		18	0,2,3,4,5,8,11,12,13,14,18,19,21,23,24,26,27,28
Convallaria_majalis_1|C624294	Convallaria_majalis|scaffold6961	16	0.00967478	0.0159956		35	77,81,86,88,89,102,103,104,115,117,117,118,121,132,133,135,142,151,152,154,164,179,182,184,185,189,195,197,203,205,214,217,217,218,219
Convallaria_majalis_1|C627094	Convallaria_majalis|C721632	5	0.00177462	0.00386057		18	1.79182e+53
Convallaria_majalis_1|C627972	Convallaria_majalis|scaffold18012	7	0.00580477	0.0104318		17	1.79182e+50
Convallaria_majalis_1|C629442	Convallaria_majalis|scaffold31557	5	0.00215629	0.00461		17	1.79182e+50
Convallaria_majalis_1|C632046	Convallaria_majalis|C691009	10	0.0239919	0.0354167		11	1.79182e+32
Convallaria_majalis_1|C635520	Convallaria_majalis|C813952	6	9.90856e-05	0.000332071		14	1.79182e+41
Convallaria_majalis_1|C636372	Convallaria_majalis|C780089	6	7.31073e-05	0.000259009		14	1.79182e+41
Convallaria_majalis_1|C642196	Convallaria_majalis|C648380	8	0.0256607	0.0369992		5	116117118119121
Convallaria_majalis_1|C643326	Convallaria_majalis|scaffold8995	12	2.25252e-05	8.81094e-05		38	59,60,60,70,77,81,86,89,102,103,103,109,111,112,113,117,118,121,135,142,151,152,164,179,182,184,185,189,194,195,197,203,205,217,218,219,223,224
Convallaria_majalis_1|C644578	Convallaria_majalis|scaffold3304	4	0.00122091	0.00290484		10	1.02103e+29
Convallaria_majalis_1|C645360	Convallaria_majalis|C792055	9	6.88171e-07	4.55668e-06		30	77,81,86,87,89,102,103,117,118,121,134,135,142,151,152,164,179,182,184,185,189,195,197,203,205,217,218,219,223,224
Convallaria_majalis_1|C646026	Convallaria_majalis|C805041	5	2.27379e-05	8.81094e-05		15	1.79182e+44
Convallaria_majalis_1|C646828	Convallaria_majalis|scaffold41357	6	0.0278969	0.0393092		14	1.79182e+41
Convallaria_majalis_1|C647512	Convallaria_majalis|scaffold40139	8	1.61118e-05	6.65953e-05		31	77,81,86,89,102,103,117,118,121,122,135,142,151,152,156,164,179,182,184,185,185,189,195,197,203,205,217,218,219,223,224
Convallaria_majalis_1|C647944	Convallaria_majalis|C643294	11	0.0672316	0.0896421		11	59,60,65,68,71,74,77,80,81,86,89
Convallaria_majalis_1|C650950	Convallaria_majalis|scaffold44351	5	1.59718e-08	1.80045e-07		39	27,28,43,44,59,60,65,68,71,74,76,77,80,81,86,89,102,103,117,118,121,128,135,142,151,152,164,179,182,184,185,189,195,197,203,205,217,218,219
Convallaria_majalis_1|C655484	Convallaria_majalis|scaffold31701	4	3.79884e-09	5.23396e-08		34	59,60,65,68,71,74,77,80,81,86,89,102,103,117,118,121,128,135,142,151,152,164,179,182,184,185,189,195,197,203,205,217,218,219
Convallaria_majalis_1|C656734	Convallaria_majalis|C810499	7	9.5182e-11	1.68608e-09		35	59,60,69,71,74,77,80,81,86,89,95,102,103,117,118,121,128,135,142,151,152,164,179,182,184,185,189,195,197,203,205,205,217,218,219
Convallaria_majalis_1|C657814	Convallaria_majalis|scaffold3192	27	0.000135432	0.00041984		17	1.77179e+50
Convallaria_majalis_1|C658846	Convallaria_majalis|C806731	6	4.24507e-13	2.63194e-11		41	22,27,28,33,39,50,51,52,74,75,76,77,103,104,118,121,135,142,148,151,152,152,164,167,177,179,182,184,185,186,189,195,195,197,203,205,205,214,217,218,219
Convallaria_majalis_1|C660740	Convallaria_majalis|C814220	13	9.13956e-13	3.77768e-11		25	1.35142e+74
Convallaria_majalis_1|C664220	Convallaria_majalis|C810549	7	2.78881e-08	2.88177e-07		29	1.18121e+86
Gene1	Gene2	NumDiffs	Pvalue	FDRCorrectedPValue	NumRes_ClusterwHighP	ClusterLen_FracTotalLength	Coords
Cornus_ellipica|scaffold170	Cornus_florida|scaffold11273	13	0.00846836	0.0181252		5	189191202204205
Cornus_ellipica|scaffold1445	Cornus_florida|C320756	11	0.001668	0.00473246		4	243244245247
Cornus_ellipica|scaffold2516	Cornus_florida|scaffold838	9	0.00920301	0.018406		4	204205209211
Cornus_ellipica|scaffold3398	Cornus_florida|scaffold17720	48	0.00066652	0.00226766		7	6.69671e+20
Cornus_ellipica|scaffold3883	Cornus_florida|scaffold2503	5	0.0698058	0.090599		4	219220221222
Cornus_ellipica|scaffold6450	Cornus_florida|scaffold4317	10	0.0112775	0.0214977		5	219219220221222
Cornus_ellipica|scaffold7308	Cornus_florida|C315149	10	0.0294334	0.0432635		4	219220221222
Cornus_ellipica|scaffold7564	Cornus_florida|scaffold1219	10	0.0213573	0.0352107		4	219220221222
Cornus_ellipica|scaffold9089	Cornus_florida|scaffold10756	14	0.013265	0.0234541		4	682683684685
Cornus_ellipica|scaffold9703	Cornus_florida|C274479	8	0.0408971	0.0559132		4	682683684685
Cornus_ellipica|scaffold10720	Cornus_florida|scaffold5663	23	0.0138112	0.024071		4	682683684685
Cornus_ellipica|scaffold10841	Cornus_florida|C333463	7	0.0421027	0.0564454		4	682683684685
Cornus_ellipica|scaffold11009	Cornus_florida|C331281	5	0.122154	0.137988		4	682683684685
Cornus_ellipica|scaffold11193	Cornus_florida|scaffold955	14	0.00426614	0.00982017		7	6.69671e+20
Cornus_ellipica|scaffold11881	Cornus_florida|scaffold16147	13	0.0610398	0.0800738		4	682683684685
Cornus_ellipica|scaffold13044	Cornus_florida|C290711	8	0.0929636	0.114561		4	682683684685
Cornus_ellipica|scaffold13715	Cornus_florida|C211958	7	0.0863296	0.109711		4	682683684685
Cornus_ellipica|scaffold14536	Cornus_florida|C332437	12	0.013265	0.0234541		4	682683684685
Cornus_ellipica|scaffold14862	Cornus_florida|C343663	9	0.0203869	0.0340713		4	682683684685
Cornus_ellipica|scaffold15134	Cornus_florida|C328089	9	0.0265713	0.0405404		4	682683684685
Cornus_ellipica|scaffold15145	Cornus_florida|C380362	55	0.0238863	0.0378458		4	147149150152
Cornus_ellipica|scaffold15967	Cornus_florida|C232849	3	0.158666	0.175975		6	1.42143e+17
Cornus_ellipica|scaffold17123	Cornus_florida|scaffold12299	7	0.0391649	0.0549209		5	104106107110112
Cornus_ellipica|scaffold17694	Cornus_florida|scaffold3801	18	0.0312683	0.0454135		24	2.43245e+71
Cornus_ellipica|scaffold18087	Cornus_florida|scaffold9754	8	0.0226165	0.0363055		31	2.19221e+92
Cornus_ellipica|scaffold18922	Cornus_florida|C345687	7	0.167471	0.180809		3	219219221
Cornus_ellipica|scaffold18944	Cornus_florida|C345967	20	0.140242	0.156969		3	171172173
Cornus_ellipica|scaffold19098	Cornus_florida|C379306	11	0.00284003	0.007372		8	2.18219e+23
Cornus_ellipica|scaffold21029	Cornus_florida|C326315	7	0.108984	0.127846		4	332333334336
Cornus_ellipica|scaffold22030	Cornus_florida|C280707	15	0.233621	0.250016		3	332333334
Cornus_ellipica|scaffold22354	Cornus_florida|C346673	9	0.0975085	0.11896		3	173173174
Cornus_ellipica|scaffold22628	Cornus_florida|scaffold7360	19	0.000171978	0.000777084		35	2.19221e+104
Cornus_ellipica|scaffold22915	Cornus_florida|scaffold10019	16	0.00140219	0.00438633		33	2.19221e+98
Cornus_ellipica|scaffold23199	Cornus_florida|C359329	7	0.0375742	0.0533029		4	277279281281
Cornus_ellipica|scaffold23517	Cornus_florida|scaffold11764	8	0.0875085	0.110062		3	279281281
Cornus_ellipica|scaffold23598	Cornus_florida|C272191	8	0.164078	0.180338		3	279281281
Cornus_ellipica|scaffold24764	Cornus_florida|C358635	27	0.009028	0.018406		19	2.66267e+56
Cornus_ellipica|scaffold24817	Cornus_florida|C385536	50	0.0446249	0.0591765		3	438439440
Cornus_ellipica|scaffold24933	Cornus_florida|C127200	4	0.437642	0.448674		3	438439440
Cornus_ellipica|scaffold25235	Cornus_florida|C277585	4	0.451428	0.458952		3	438439440
Cornus_ellipica|scaffold27303	Cornus_florida|C352169	42	0.102321	0.122384		3	438439440
Cornus_ellipica|scaffold27565	Cornus_florida|C356893	12	0.00164341	0.00473246		35	9.51011e+103
Cornus_ellipica|scaffold27960	Cornus_florida|C371306	9	0.00234809	0.00622753		21	9.51011e+61
Cornus_ellipica|scaffold29143	Cornus_florida|C304046	1	0.358943	0.371111		4	464465467468
Cornus_ellipica|scaffold29854	Cornus_florida|C305914	2	0.106047	0.125609		4	464465467468
Cornus_ellipica|scaffold30367	Cornus_florida|scaffold17308	14	0.000130882	0.000638702		34	1.0711e+101
Cornus_ellipica|scaffold30891	Cornus_florida|C209636	1	0.120987	0.137948		4	278279279281
Cornus_ellipica|scaffold31126	Cornus_florida|C358231	12	0.00367228	0.00878466		7	2.71272e+20
Cornus_ellipica|C185584	Cornus_florida|C336049	4	0.331146	0.345297		3	278278279
Cornus_ellipica|C209268	Cornus_florida|C283343	16	0.116724	0.134342		6	1.08109e+17
Cornus_ellipica|C283041	Cornus_florida|C181325	7	0.0397864	0.0551585		10	1.08109e+29
Cornus_ellipica|C305992	Cornus_florida|C394910	7	0.0258224	0.0403888		10	1.08109e+29
Cornus_ellipica|C325557	Cornus_florida|C323554	44	0.0265839	0.0405404		14	35,36,37,38,44,45,46,47,48,54,55,56,57,58
Cornus_ellipica|C329662	Cornus_florida|C373062	1	0.989779	0.989779		2	11,12
Cornus_ellipica|C332496	Cornus_florida|C305464	30	0.0126512	0.0230366		14	1.61163e+41
Cornus_ellipica|C337419	Cornus_florida|scaffold417	21	0.251477	0.266784		8	1.70171e+23
Cornus_ellipica|C369208	Cornus_florida|C233357	16	0.000815468	0.00261808		17	1.61163e+50
Cornus_ellipica|C372094	Cornus_florida|C368424	31	0.0288182	0.0428758		13	1.56157e+38
Cornus_ellipica|C372766	Cornus_florida|C336927	7	0.0121615	0.0224804		14	1.56157e+41
Cornus_ellipica|C374702	Cornus_florida|C369336	9	0.0288182	0.0428758		13	1.56157e+38
Cornus_ellipica|C380382	Cornus_florida|C328685	9	0.0218731	0.0355803		14	1.56157e+41
Cornus_ellipica|C382810	Cornus_florida|C346465	6	0.100804	0.121763		15	1.56157e+44
Cornus_ellipica|C384482	Cornus_florida|C278417	8	0.00771122	0.0171049		18	1.51152e+53
Cornus_ellipica|C384510	Cornus_florida|C56560	12	0.260927	0.274423		3	165165166
Cornus_ellipica|C384514	Cornus_florida|C385276	6	0.989779	0.989779		2	56,56
Cornus_ellipica|C388824	Cornus_florida|C286293	5	0.0176715	0.0303651		17	1.52153e+50
Cornus_ellipica|C389162	Cornus_florida|C249431	39	0.0928204	0.114561		5	35,36,37,38,39
Cornus_ellipica|C391313	Cornus_florida|C400342	10	0.00912428	0.018406		6	35,36,37,38,39,40
Cornus_ellipica|C400697	Cornus_florida|C334731	5	0.0120664	0.0224804		6	1.51152e+17
Cornus_ellipica|C406353	Cornus_florida|C298215	5	0.0827795	0.106306		6	1.51152e+17
Cornus_ellipica|C411834	Cornus_florida|C342665	9	0.00358891	0.00877743		10	35,36,37,38,39,40,41,42,45,46
Cornus_ellipica|C421792	Cornus_florida|C307647	22	0.0326328	0.0468377		6	1.17118e+17
Cornus_ellipica|C422697	Cornus_florida|C350949	7	0.000171564	0.000777084		38	80,83,86,89,95,98,98,101,103,104,107,107,110,110,117,118,119,120,121,122,125,134,140,141,151,152,153,154,155,156,161,173,175,176,179,182,183,186
Cornus_ellipica|C434344	Cornus_florida|C315247	2	0.00910038	0.018406		16	98,98,101,103,104,107,107,107,110,110,117,118,119,120,121,122
Cornus_ellipica|C446417	Cornus_florida|C63886	16	0.16737	0.180809		6	1.51152e+17
Cornus_ellipica|C450205	Cornus_florida|C307445	6	0.0104734	0.020609		6	1.51152e+17
Cornus_ellipica|C452767	Cornus_florida|C311473	1	0.0412474	0.0559132		6	1.51152e+17
Cornus_ellipica|C458158	Cornus_florida|C260219	0	0.010975	0.0212531		6	1.51152e+17
Cornus_ellipica|C462478	Cornus_florida|C354875	20	0.00145107	0.00442575		10	1.49151e+29
Cornus_ellipica|C463610	Cornus_florida|scaffold9725	8	6.86641e-05	0.000349043		10	1.49151e+29
Cornus_ellipica|C469962	Cornus_florida|scaffold7783	12	0.000336083	0.00124249		11	1.49151e+32
Cornus_ellipica|C473500	Cornus_florida|C293143	10	0.000244078	0.00102681		11	1.51151e+32
Cornus_ellipica|C476093	Cornus_florida|C355571	15	0.000788958	0.00260143		14	1.51152e+41
Cornus_ellipica|C481105	Cornus_florida|C386668	8	0.00292675	0.00743881		6	1.51152e+17
Cornus_ellipica|C489163	Cornus_florida|scaffold5568	31	4.37059e-05	0.000231831		16	1.35136e+47
Cornus_ellipica|C493117	Cornus_florida|C352041	8	1.78505e-06	1.8148e-05		16	1.35136e+47
Cornus_ellipica|C498525	Cornus_florida|C352023	21	0.00819477	0.0178529		9	2.33235e+26
Cornus_ellipica|C498825	Cornus_florida|C365512	10	1.09784e-06	1.33937e-05		33	1.3814e+98
Cornus_ellipica|C499285	Cornus_florida|scaffold15625	6	0.116724	0.134342		6	1.51152e+17
Cornus_ellipica|C501923	Cornus_florida|scaffold16683	8	0.00383592	0.00899967		9	2.33235e+26
Cornus_ellipica|C506877	Cornus_florida|C354387	6	6.53007e-07	9.95835e-06		36	1.4014e+107
Cornus_ellipica|C511479	Cornus_florida|C362488	8	0.0022575	0.00616413		9	2.33235e+26
Cornus_ellipica|C512001	Cornus_florida|C361738	9	2.5629e-05	0.000148892		35	1.4014e+104
Cornus_ellipica|C512197	Cornus_florida|scaffold9033	10	2.53677e-06	2.21061e-05		31	1.4014e+92
Cornus_ellipica|C513959	Cornus_florida|scaffold2195	6	3.94225e-07	8.0159e-06		30	1.4014e+89
Cornus_ellipica|C517839	Cornus_florida|scaffold14891	10	0.000239864	0.00102681		10	2.33235e+29
Cornus_ellipica|C520188	Cornus_florida|C357457	12	0.000312569	0.00119167		23	1.3614e+68
Cornus_ellipica|C520194	Cornus_florida|C358697	6	0.00359731	0.00877743		11	1.4014e+32
Cornus_ellipica|C521126	Cornus_florida|C322994	7	1.42436e-05	8.68859e-05		24	1.3914e+71
Cornus_ellipica|C522199	Cornus_florida|scaffold7013	6	4.21171e-09	5.13829e-07		33	1.4014e+98
Cornus_ellipica|C523787	Cornus_florida|C372694	8	2.07088e-06	1.94344e-05		32	1.4014e+95
Cornus_ellipica|C523803	Cornus_florida|C229300	2	0.0199138	0.0337428		6	1.51152e+17
Cornus_ellipica|C526640	Cornus_florida|C346323	9	1.54518e-07	4.7128e-06		34	1.4014e+101
Cornus_ellipica|C529834	Cornus_florida|scaffold14302	19	6.79751e-06	4.73732e-05		10	2.32233e+29
Cornus_ellipica|C530508	Cornus_florida|C357915	7	7.37779e-06	4.73732e-05		12	2.32233e+35
Cornus_ellipica|C531406	Cornus_florida|C377436	16	8.54641e-07	1.15851e-05		11	2.33235e+32
Cornus_ellipica|C531970	Cornus_florida|C383578	10	0.000271777	0.00110523		9	2.33235e+26
Cornus_ellipica|C532154	Cornus_florida|C367942	17	0.000310605	0.00119167		12	2.31232e+35
Cornus_ellipica|C532622	Cornus_florida|C387274	9	2.9418e-08	1.7945e-06		36	1.40141e+107
Cornus_ellipica|C533486	Cornus_florida|scaffold14980	10	7.0379e-06	4.73732e-05		12	2.31232e+35
Cornus_ellipica|C533532	Cornus_florida|C386768	14	6.94805e-08	2.82554e-06		11	2.33233e+32
Cornus_ellipica|C535364	Cornus_florida|C344297	4	0.00609767	0.0137762		9	2.33233e+26
Cornus_ellipica|C535720	Cornus_florida|C280937	6	0.00156169	0.00464698		10	2.33235e+29
Cornus_ellipica|C536804	Cornus_florida|C377964	9	5.89974e-07	9.95835e-06		10	2.33235e+29
Cornus_ellipica|C538448	Cornus_florida|C310099	12	3.70446e-05	0.000205429		18	2.33235e+53
Cornus_ellipica|C538896	Cornus_florida|C365598	10	3.81174e-07	8.0159e-06		11	2.33235e+32
Cornus_ellipica|C540004	Cornus_florida|scaffold15683	9	7.19193e-06	4.73732e-05		10	2.33235e+29
Cornus_ellipica|C540112	Cornus_florida|scaffold18409	10	0.000669146	0.00226766		10	2.33235e+29
Cornus_ellipica|C542812	Cornus_florida|C303872	6	0.00227365	0.00616413		10	2.33235e+29
Cornus_ellipica|C542910	Cornus_florida|C380058	23	0.000589125	0.00211392		19	1.40141e+56
Cornus_ellipica|C550254	Cornus_florida|C354351	6	1.60594e-06	1.78113e-05		30	1.40141e+89
Cornus_ellipica|C550306	Cornus_florida|scaffold18880	8	6.20428e-06	4.73732e-05		30	1.40141e+89
Gene1	Gene2	NumDiffs	Pvalue	FDRCorrectedPValue	NumRes_ClusterwHighP	ClusterLen_FracTotalLength	Coords
Cornus_alternifolia|scaffold2455	Cornus_controversa|C314511	4	0.283469	0.293684		2	47,62
Cornus_alternifolia|scaffold4265	Cornus_controversa|C368681	70	0.00771141	0.011517		33	2.12218e+98
Cornus_alternifolia|scaffold4893	Cornus_controversa|C300992	1	0.795311	0.802287		4	353354355356
Cornus_alternifolia|scaffold5908	Cornus_controversa|scaffold3551	22	0.059685	0.073804		4	353354355356
Cornus_alternifolia|scaffold8047	Cornus_controversa|C315335	6	0.155181	0.178175		4	353354355356
Cornus_alternifolia|scaffold9595	Cornus_controversa|scaffold7595	9	0.00173447	0.00297708		28	2.54255e+83
Cornus_alternifolia|scaffold9850	Cornus_controversa|C336509	8	0.00529276	0.00845372		42	2.10212e+125
Cornus_alternifolia|scaffold9909	Cornus_controversa|C406016	14	3.63523e-17	1.3935e-15		42	2.10212e+125
Cornus_alternifolia|scaffold10483	Cornus_controversa|C168805	7	0.444888	0.456805		4	353354355356
Cornus_alternifolia|scaffold11263	Cornus_controversa|scaffold2884	18	0.00165175	0.00287805		19	2.54255e+56
Cornus_alternifolia|scaffold12133	Cornus_controversa|C395716	24	9.86951e-06	2.26999e-05		36	2.18224e+107
Cornus_alternifolia|scaffold13156	Cornus_controversa|C367291	8	2.80535e-05	5.97437e-05		37	2.24227e+110
Cornus_alternifolia|scaffold13568	Cornus_controversa|scaffold4954	16	0.119772	0.140549		4	353354355356
Cornus_alternifolia|scaffold13750	Cornus_controversa|C285406	13	0.219021	0.229842		4	353354355356
Cornus_alternifolia|scaffold14951	Cornus_controversa|scaffold12822	6	0.119772	0.140549		4	353354355356
Cornus_alternifolia|scaffold15475	Cornus_controversa|scaffold15406	10	4.57303e-16	1.31475e-14		53	2.09212e+158
Cornus_alternifolia|scaffold15858	Cornus_controversa|scaffold13937	7	0.150631	0.174976		4	353354355356
Cornus_alternifolia|scaffold15998	Cornus_controversa|scaffold14044	8	1.44672e-12	1.66373e-11		39	2.09212e+116
Cornus_alternifolia|scaffold16318	Cornus_controversa|scaffold14465	7	0.00684661	0.01036		37	2.09212e+110
Cornus_alternifolia|scaffold16642	Cornus_controversa|C215533	5	0.175243	0.188345		4	353354355356
Cornus_alternifolia|scaffold17127	Cornus_controversa|scaffold18845	8	7.98027e-09	3.52973e-08		37	2.09212e+110
Cornus_alternifolia|scaffold17434	Cornus_controversa|scaffold19267	8	7.68572e-09	3.52973e-08		38	2.09212e+113
Cornus_alternifolia|scaffold18464	Cornus_controversa|C408050	12	0.025109	0.03319		9	3.50353e+26
Cornus_alternifolia|scaffold18826	Cornus_controversa|scaffold14736	8	1.75884e-06	4.59809e-06		44	2.09212e+131
Cornus_alternifolia|scaffold18922	Cornus_controversa|C280334	6	0.0872386	0.105605		4	353354355356
Cornus_alternifolia|scaffold18925	Cornus_controversa|C104666	1	0.478034	0.486495		3	368368369
Cornus_alternifolia|scaffold19054	Cornus_controversa|scaffold18130	12	7.06788e-10	4.27793e-09		35	2.09212e+104
Cornus_alternifolia|scaffold19506	Cornus_controversa|scaffold15582	11	6.38814e-14	9.18295e-13		41	2.09212e+122
Cornus_alternifolia|scaffold19556	Cornus_controversa|scaffold17342	8	9.39511e-06	2.20498e-05		36	2.06209e+107
Cornus_alternifolia|scaffold19699	Cornus_controversa|scaffold6599	16	0.00542149	0.0085407		38	2.23224e+113
Cornus_alternifolia|scaffold19897	Cornus_controversa|scaffold19462	23	2.08124e-10	1.32968e-09		37	2.18224e+110
Cornus_alternifolia|scaffold19898	Cornus_controversa|C393734	9	7.33897e-11	6.00486e-10		38	2.13218e+113
Cornus_alternifolia|scaffold20140	Cornus_controversa|C408396	10	8.05697e-18	4.63276e-16		46	2.18224e+137
Cornus_alternifolia|scaffold20215	Cornus_controversa|scaffold20151	11	1.14326e-06	3.13037e-06		56	2.18224e+167
Cornus_alternifolia|scaffold20340	Cornus_controversa|C397102	11	1.19811e-05	2.70163e-05		39	2.18222e+116
Cornus_alternifolia|scaffold20573	Cornus_controversa|scaffold18844	8	0.000243813	0.00047523		29	2.60263e+86
Cornus_alternifolia|scaffold20878	Cornus_controversa|scaffold1733	10	3.69007e-05	7.7156e-05		37	2.18224e+110
Cornus_alternifolia|scaffold21172	Cornus_controversa|C390342	34	7.83242e-11	6.00486e-10		49	2.73273e+146
Cornus_alternifolia|scaffold21176	Cornus_controversa|C398882	1	2.81066e-12	2.93842e-11		49	2.73273e+146
Cornus_alternifolia|scaffold21486	Cornus_controversa|C395288	15	1.51819e-11	1.34301e-10		45	2.73275e+134
Cornus_alternifolia|scaffold21628	Cornus_controversa|C352339	6	0.180769	0.192485		4	426427428428
Cornus_alternifolia|scaffold22113	Cornus_controversa|scaffold11252	55	2.86596e-06	7.32412e-06		19	7,8,11,12,13,14,15,16,17,18,20,24,27,29,30,31,32,33,34
Cornus_alternifolia|scaffold22728	Cornus_controversa|scaffold19756	14	2.65639e-14	4.36407e-13		35	30,31,32,33,34,37,40,43,54,57,58,64,65,69,70,76,77,84,91,102,107,123,131,135,142,146,151,153,156,165,171,177,189,190,196
Cornus_alternifolia|scaffold22803	Cornus_controversa|scaffold17240	14	1.42138e-05	3.08412e-05		24	23,24,26,30,31,32,33,34,37,37,40,43,54,57,58,59,60,61,63,64,65,69,69,70
Cornus_alternifolia|scaffold22862	Cornus_controversa|C310316	11	0.0281385	0.0367719		4	69,69,70,70
Cornus_alternifolia|scaffold23051	Cornus_controversa|C408862	11	2.59418e-13	3.31478e-12		38	21,25,30,31,32,33,34,37,40,43,54,57,58,61,63,64,65,69,69,70,76,77,84,91,102,107,123,131,142,151,153,156,165,171,177,189,190,196
Cornus_alternifolia|scaffold23241	Cornus_controversa|scaffold20633	7	3.7975e-08	1.45571e-07		34	30,31,32,33,34,37,40,43,54,57,58,61,63,64,65,69,69,70,76,77,84,91,99,102,107,119,123,131,140,142,146,151,153,156
Cornus_alternifolia|scaffold23375	Cornus_controversa|scaffold11136	8	9.63454e-15	1.84662e-13		36	30,31,32,33,34,37,40,43,54,57,58,61,63,64,65,69,69,70,76,77,84,91,102,107,123,131,142,151,153,156,165,171,177,189,190,196
Cornus_alternifolia|scaffold23497	Cornus_controversa|scaffold21548	9	6.22266e-15	1.43121e-13		38	30,31,32,33,34,37,40,43,54,57,58,61,63,64,65,69,69,70,76,77,84,91,102,107,123,131,133,141,142,151,153,156,165,171,177,189,190,196
Cornus_alternifolia|C133335	Cornus_controversa|C237226	15	0.174887	0.188345		5	401402403404404
Cornus_alternifolia|C139279	Cornus_controversa|C189289	30	0.174887	0.188345		5	401402403404404
Cornus_alternifolia|C139337	Cornus_controversa|C285518	0	0.165385	0.184653		5	401402403404404
Cornus_alternifolia|C149033	Cornus_controversa|C263800	7	0.0231845	0.0313673		6	1.02102e+17
Cornus_alternifolia|C203597	Cornus_controversa|C294736	18	0.0860217	0.105239		3	107107107
Cornus_alternifolia|C213471	Cornus_controversa|C230807	23	0.0330288	0.0426776		11	1.13113e+32
Cornus_alternifolia|C214227	Cornus_controversa|C337333	32	0.113148	0.135542		7	3.98399e+20
Cornus_alternifolia|C217997	Cornus_controversa|C144618	18	0.219849	0.229842		5	107108109110110
Cornus_alternifolia|C228535	Cornus_controversa|scaffold7977	17	0.0380412	0.0486082		14	96,97,99,100,101,102,104,104,107,107,110,113,113,113
Cornus_alternifolia|C261970	Cornus_controversa|C308368	1	0.00462561	0.00749219		14	96,97,99,100,101,102,104,104,107,107,110,113,113,113
Cornus_alternifolia|C279641	Cornus_controversa|C147972	26	0.156484	0.178175		5	401402403404404
Cornus_alternifolia|C284969	Cornus_controversa|C315205	2	0.0118853	0.0166684		10	3.98399e+29
Cornus_alternifolia|C285421	Cornus_controversa|C330507	8	0.0182543	0.024991		13	90,91,91,92,93,99,100,101,102,104,105,107,107
Cornus_alternifolia|C285493	Cornus_controversa|C225631	6	0.165385	0.184653		5	401402403404404
Cornus_alternifolia|C285569	Cornus_controversa|C369670	6	0.00900936	0.013283		10	3.98399e+29
Cornus_alternifolia|C299690	Cornus_controversa|C208327	20	0.00331494	0.00552491		11	9.91001e+31
Cornus_alternifolia|C311748	Cornus_controversa|scaffold1908	14	0.903028	0.903028		2	107107
Cornus_alternifolia|C311886	Cornus_controversa|C372941	12	0.0114766	0.0162939		10	2,3,4,5,6,7,8,9,10,11
Cornus_alternifolia|C317272	Cornus_controversa|C330791	2	0.00382762	0.00628823		9	4,5,6,7,8,9,10,11,13
Cornus_alternifolia|C322520	Cornus_controversa|scaffold807	15	0.00980691	0.0140974		11	9.91001e+31
Cornus_alternifolia|C325254	Cornus_controversa|C312087	11	0.000280248	0.000537142		36	91,92,94,99,100,101,102,104,105,107,107,110,113,119,122,123,129,131,135,140,142,149,150,151,153,156,159,160,161,165,165,167,167,171,174,177
Cornus_alternifolia|C325702	Cornus_controversa|C202470	1	0.02459	0.032882		9	9.91001e+25
Cornus_alternifolia|C326406	Cornus_controversa|C275573	6	0.00962519	0.0140114		5	165165165167167
Cornus_alternifolia|C327100	Cornus_controversa|C343097	7	0.0585344	0.0731679		7	3.98399e+20
Cornus_alternifolia|C332427	Cornus_controversa|C378757	6	0.0127509	0.0176669		10	3.98399e+29
Cornus_alternifolia|C333538	Cornus_controversa|C321020	15	0.000954753	0.0017428		12	3.98399e+35
Cornus_alternifolia|C336144	Cornus_controversa|C355335	9	0.00161658	0.00286011		32	98,99,100,101,102,104,105,107,107,110,113,119,122,123,124,131,140,142,149,151,153,156,159,160,161,165,166,167,171,172,176,177
Cornus_alternifolia|C343030	Cornus_controversa|C370016	7	0.000183451	0.000363738		12	3.98399e+35
Cornus_alternifolia|C346996	Cornus_controversa|C311807	7	0.00683645	0.01036		10	9.91001e+28
Cornus_alternifolia|C347066	Cornus_controversa|C340311	1	0.174887	0.188345		5	401402403404404
Cornus_alternifolia|C348314	Cornus_controversa|C255920	6	0.0403554	0.0509986		7	3.98399e+20
Cornus_alternifolia|C354608	Cornus_controversa|C296652	6	0.00139722	0.00251064		9	99,99,100,101,102,104,105,107,107
Cornus_alternifolia|C355498	Cornus_controversa|C358588	8	5.23016e-06	1.27972e-05		31	91,92,99,100,101,102,104,105,107,107,110,113,119,122,123,131,136,140,142,149,151,153,156,159,160,161,165,167,171,174,177
Cornus_alternifolia|C367096	Cornus_controversa|scaffold4490	5	0.000177892	0.000358904		9	9.91001e+25
Cornus_alternifolia|C368312	Cornus_controversa|C383405	7	0.000691521	0.00128266		12	3.98399e+35
Cornus_alternifolia|C368704	Cornus_controversa|scaffold6171	7	1.96749e-07	6.28488e-07		34	91,92,99,100,101,102,104,105,107,107,110,113,119,122,123,131,140,142,149,151,153,156,159,160,161,165,167,171,174,177,189,190,191,196
Cornus_alternifolia|C371810	Cornus_controversa|scaffold17734	7	1.68175e-07	5.52575e-07		30	91,92,99,100,101,102,104,105,107,107,110,113,119,122,123,131,140,142,149,151,153,156,159,160,161,162,165,167,169,171
Cornus_alternifolia|C372202	Cornus_controversa|C383071	15	4.26967e-07	1.22753e-06		36	89,91,92,99,99,100,101,101,102,104,105,107,107,110,113,119,122,123,131,140,142,149,151,153,156,159,160,161,165,167,171,175,177,186,189,190
Cornus_alternifolia|C374972	Cornus_controversa|C263404	6	0.00290208	0.00490792		10	99,99,100,101,101,102,104,105,107,107
Cornus_alternifolia|C375688	Cornus_controversa|C400700	19	2.38414e-07	7.21517e-07		28	3.98399e+83
Cornus_alternifolia|C375848	Cornus_controversa|C408846	11	5.89705e-06	1.41284e-05		16	91,92,99,100,101,102,104,105,106,107,107,110,113,119,122,123
Cornus_alternifolia|C380060	Cornus_controversa|C375299	6	4.5271e-05	9.29672e-05		12	3.98399e+35
Cornus_alternifolia|C380300	Cornus_controversa|C337063	8	0.000382593	0.000721282		10	9.91001e+28
Cornus_alternifolia|C381796	Cornus_controversa|C382351	7	3.80677e-07	1.12251e-06		29	91,92,99,100,101,102,104,105,105,107,107,110,113,119,122,123,125,131,140,142,151,153,156,165,167,171,176,177,177
Cornus_alternifolia|C388490	Cornus_controversa|scaffold264	25	1.25985e-05	2.7862e-05		13	3.98399e+38
Cornus_alternifolia|C388634	Cornus_controversa|C396496	4	1.26046e-08	5.36863e-08		29	3.94398e+86
Cornus_alternifolia|C388822	Cornus_controversa|C392034	6	4.90825e-07	1.3767e-06		13	3.98399e+38
Cornus_alternifolia|C391132	Cornus_controversa|C394188	8	1.55616e-07	5.42297e-07		13	3.98399e+38
Cornus_alternifolia|C391810	Cornus_controversa|C394104	16	2.17079e-08	8.60831e-08		29	3.98399e+86
Cornus_alternifolia|C392968	Cornus_controversa|C399890	8	9.12298e-10	5.24571e-09		28	3.98399e+83
Cornus_alternifolia|C393028	Cornus_controversa|C393308	7	4.0405e-06	1.01012e-05		12	3.98399e+35
Cornus_alternifolia|C393980	Cornus_controversa|scaffold15226	5	4.91846e-08	1.82459e-07		28	3.98399e+83
Cornus_alternifolia|C394554	Cornus_controversa|C398108	10	2.01191e-08	8.26321e-08		27	3.98399e+80
Cornus_alternifolia|C395254	Cornus_controversa|scaffold17587	11	1.66083e-09	8.6816e-09		27	3.98399e+80
Cornus_alternifolia|C396520	Cornus_controversa|C396472	9	5.5531e-09	2.66086e-08		28	3.98399e+83
Cornus_alternifolia|C396664	Cornus_controversa|C400492	15	2.02209e-07	6.28488e-07		28	3.98399e+83
Cornus_alternifolia|C398332	Cornus_controversa|scaffold18181	16	1.6057e-10	1.08621e-09		34	3.98399e+101
Cornus_alternifolia|C399444	Cornus_controversa|C403926	8	1.5311e-10	1.08621e-09		26	3.98399e+77
Cornus_alternifolia|C400508	Cornus_controversa|scaffold13646	7	1.57234e-09	8.61044e-09		26	3.98399e+77
Cornus_alternifolia|C400896	Cornus_controversa|C362010	12	0.00563654	0.00875949		10	3.98399e+29
Cornus_alternifolia|C401110	Cornus_controversa|C402354	9	1.75927e-06	4.59809e-06		12	3.98399e+35
Cornus_alternifolia|C401970	Cornus_controversa|scaffold19949	8	7.29383e-08	2.62122e-07		26	3.98399e+77
Cornus_alternifolia|C403588	Cornus_controversa|C410556	11	1.99819e-09	9.99094e-09		26	3.98399e+77
Cornus_alternifolia|C403844	Cornus_controversa|C393702	7	1.65136e-07	5.52575e-07		12	3.98399e+35
Cornus_alternifolia|C404166	Cornus_controversa|C405438	10	6.39543e-12	6.12895e-11		27	3.98399e+80
Cornus_alternifolia|C407980	Cornus_controversa|scaffold12576	13	1.27047e-18	1.46104e-16		57	9.11001e+169
Gene1	Gene2	NumDiffs	Pvalue	FDRCorrectedPValue	NumRes_ClusterwHighP	ClusterLen_FracTotalLength	Coords
Cotinus_coggygria|scaffold165	Cotinus_obovatus|C353120	9	0.148982	0.172007		5	517553615685718
Cotinus_coggygria|scaffold1210	Cotinus_obovatus|C298712	7	0.0501422	0.0612314		3	237246250
Cotinus_coggygria|scaffold1557	Cotinus_obovatus|C299176	7	0.0387047	0.0481912		2	168169
Cotinus_coggygria|scaffold1694	Cotinus_obovatus|C361887	13	6.7232e-05	0.000139975		3	0,2,3
Cotinus_coggygria|scaffold1875	Cotinus_obovatus|C290862	29	0.011995	0.0167402		7	1.47148e+20
Cotinus_coggygria|scaffold2542	Cotinus_obovatus|C272113	24	0.258838	0.276238		8	17,20,25,27,32,36,38,41
Cotinus_coggygria|scaffold3882	Cotinus_obovatus|scaffold15801	25	0.0890159	0.105654		11	1.61167e+32
Cotinus_coggygria|scaffold4495	Cotinus_obovatus|scaffold11521	3	0.0474542	0.0585116		12	1.67167e+35
Cotinus_coggygria|scaffold5072	Cotinus_obovatus|scaffold4506	28	0.00166629	0.00271306		4	269270271273
Cotinus_coggygria|scaffold5579	Cotinus_obovatus|C348888	9	0.000536874	0.000974043		4	269270271273
Cotinus_coggygria|scaffold5587	Cotinus_obovatus|scaffold18382	7	0.00125897	0.00207648		4	269270271273
Cotinus_coggygria|scaffold5757	Cotinus_obovatus|C316050	46	0.00534585	0.00789446		5	393394396397400
Cotinus_coggygria|scaffold6178	Cotinus_obovatus|scaffold9092	12	0.0240079	0.0304901		5	393394396397400
Cotinus_coggygria|scaffold6361	Cotinus_obovatus|scaffold6174	7	7.41968e-13	1.34614e-11		39	2.13216e+116
Cotinus_coggygria|scaffold6483	Cotinus_obovatus|C256982	9	0.101831	0.118648		4	393394396397
Cotinus_coggygria|scaffold6941	Cotinus_obovatus|C356374	11	6.56159e-16	7.3823e-14		36	2.13216e+107
Cotinus_coggygria|scaffold7964	Cotinus_obovatus|C350134	9	4.88298e-09	2.97309e-08		38	2.13216e+113
Cotinus_coggygria|scaffold8686	Cotinus_obovatus|C335719	5	0.999532	0.999532		2	2,3
Cotinus_coggygria|scaffold9749	Cotinus_obovatus|scaffold10966	7	0.0986266	0.115978		4	393394396397
Cotinus_coggygria|scaffold9778	Cotinus_obovatus|scaffold4849	5	0.215924	0.242675		4	393394396397
Cotinus_coggygria|scaffold9935	Cotinus_obovatus|C349890	10	9.00037e-07	2.65545e-06		36	2.13216e+107
Cotinus_coggygria|scaffold9984	Cotinus_obovatus|C341734	7	3.39024e-05	7.68858e-05		35	2.13216e+104
Cotinus_coggygria|scaffold10017	Cotinus_obovatus|C347612	7	7.36662e-08	2.83503e-07		36	2.13216e+107
Cotinus_coggygria|scaffold10689	Cotinus_obovatus|scaffold2586	27	1.66783e-05	3.92248e-05		20	3.80383e+59
Cotinus_coggygria|scaffold11139	Cotinus_obovatus|scaffold7802	14	1.84883e-09	1.30445e-08		22	3.80383e+65
Cotinus_coggygria|scaffold11413	Cotinus_obovatus|scaffold9379	6	3.1777e-06	7.91309e-06		20	3.80383e+59
Cotinus_coggygria|scaffold13073	Cotinus_obovatus|C322385	7	0.000132157	0.000258214		17	3.80383e+50
Cotinus_coggygria|scaffold13581	Cotinus_obovatus|C354488	30	1.09074e-06	3.0783e-06		24	3.7738e+71
Cotinus_coggygria|scaffold13694	Cotinus_obovatus|C323913	5	0.00335884	0.0052021		21	3.92393e+62
Cotinus_coggygria|scaffold13694	Cotinus_obovatus|C323913	5	0.00335884	0.0052021		21	3.92393e+62
Cotinus_coggygria|scaffold14452	Cotinus_obovatus|C351682	6	1.82161e-09	1.30445e-08		25	3.7738e+74
Cotinus_coggygria|scaffold14678	Cotinus_obovatus|scaffold18236	6	2.32594e-08	1.0014e-07		26	3.7738e+77
Cotinus_coggygria|scaffold14956	Cotinus_obovatus|C323449	7	5.15024e-09	2.97309e-08		27	3.7738e+80
Cotinus_coggygria|scaffold15257	Cotinus_obovatus|C341584	3	1.74246e-08	7.90329e-08		26	3.7738e+77
Cotinus_coggygria|scaffold15662	Cotinus_obovatus|scaffold18870	9	3.53055e-11	4.982e-10		25	3.7738e+74
Cotinus_coggygria|scaffold15963	Cotinus_obovatus|C342512	7	5.04102e-09	2.97309e-08		24	3.7738e+71
Cotinus_coggygria|scaffold16026	Cotinus_obovatus|scaffold8557	29	1.0943e-05	2.67262e-05		14	19,20,21,22,25,29,32,33,34,35,39,40,41,44
Cotinus_coggygria|scaffold16617	Cotinus_obovatus|C357064	10	9.18825e-10	7.77939e-09		36	35,39,40,41,44,80,86,90,103,104,107,113,116,117,119,125,140,149,236,331,339,372,380,385,393,394,396,397,400,409,415,434,436,450,451,455
Cotinus_coggygria|scaffold16818	Cotinus_obovatus|C344662	11	3.76469e-05	8.388e-05		41	39,40,41,44,80,86,90,103,104,107,113,116,117,119,125,140,149,165,193,214,236,307,310,311,329,339,359,380,385,393,394,396,397,400,409,415,434,436,450,451,455
Cotinus_coggygria|scaffold16919	Cotinus_obovatus|C321843	7	0.00388563	0.00594548		12	80,86,90,90,103,104,107,113,116,117,119,125
Cotinus_coggygria|scaffold16945	Cotinus_obovatus|C350882	8	0.997831	0.999532		2	2,3
Cotinus_coggygria|scaffold17089	Cotinus_obovatus|scaffold15797	7	0.000262974	0.000498473		12	80,86,90,103,104,107,113,116,117,119,125,130
Cotinus_coggygria|scaffold17140	Cotinus_obovatus|C361433	12	9.34966e-15	2.96852e-13		34	36,40,41,44,80,86,90,103,104,107,113,116,117,119,125,140,149,236,327,339,380,385,393,394,396,397,400,409,415,434,436,450,451,455
Cotinus_coggygria|scaffold17459	Cotinus_obovatus|C321163	9	0.000107534	0.000213388		9	3.85387e+26
Cotinus_coggygria|scaffold17486	Cotinus_obovatus|scaffold18406	7	0.000412452	0.000759151		11	80,86,90,103,104,107,113,116,117,119,125
Cotinus_coggygria|scaffold17601	Cotinus_obovatus|C352550	8	1.83372e-07	6.29414e-07		18	38,40,41,42,44,80,86,90,92,103,104,107,112,113,116,117,119,125
Cotinus_coggygria|scaffold17806	Cotinus_obovatus|scaffold8505	7	0.00404226	0.00611151		9	1.03104e+26
Cotinus_coggygria|scaffold17943	Cotinus_obovatus|scaffold2271	18	0.0119405	0.0167402		12	98,99,102,103,104,106,107,113,116,117,119,120
Cotinus_coggygria|scaffold18054	Cotinus_obovatus|C361659	9	7.91784e-15	2.96852e-13		17	98,99,102,103,104,106,107,113,116,117,119,120,125,129,140,147,149
Cotinus_coggygria|scaffold18306	Cotinus_obovatus|scaffold4977	7	1.20839e-08	5.90251e-08		14	98,99,102,103,104,106,107,113,116,117,119,120,125,129
Cotinus_coggygria|scaffold19188	Cotinus_obovatus|C348096	7	8.99044e-09	4.56715e-08		17	98,99,102,103,104,106,107,113,116,117,119,120,125,129,140,147,149
Cotinus_coggygria|C61408	Cotinus_obovatus|scaffold10361	0	0.254363	0.273763		5	102103104106107
Cotinus_coggygria|C61408	Cotinus_obovatus|scaffold10361	0	0.254363	0.273763		5	102103104106107
Cotinus_coggygria|C76738	Cotinus_obovatus|C82439	7	0.204276	0.231635		7	98,99,102,103,104,106,107
Cotinus_coggygria|C77116	Cotinus_obovatus|C84739	3	0.254363	0.273763		5	102103104106107
Cotinus_coggygria|C99475	Cotinus_obovatus|C167833	9	0.220377	0.243373		7	98,99,102,103,104,106,107
Cotinus_coggygria|C100933	Cotinus_obovatus|C288948	0	0.220377	0.243373		7	98,99,102,103,104,106,107
Cotinus_coggygria|C107634	Cotinus_obovatus|C53604	7	0.270228	0.285991		5	102103104106107
Cotinus_coggygria|C160659	Cotinus_obovatus|C219999	14	0.0239207	0.0304901		8	1.13113e+23
Cotinus_coggygria|C166719	Cotinus_obovatus|C169443	0	0.0193885	0.0253849		8	1.13113e+23
Cotinus_coggygria|C166719	Cotinus_obovatus|C169443	0	0.0193885	0.0253849		8	1.13113e+23
Cotinus_coggygria|C212136	Cotinus_obovatus|C190843	24	0.159073	0.182002		4	393394396397
Cotinus_coggygria|C243043	Cotinus_obovatus|C331309	6	0.0147436	0.0203526		6	2.12213e+17
Cotinus_coggygria|C249377	Cotinus_obovatus|C252862	30	0.0613634	0.0742205		9	1.1912e+26
Cotinus_coggygria|C249589	Cotinus_obovatus|C230600	40	0.0807598	0.0967593		5	135137140141142
Cotinus_coggygria|C257464	Cotinus_obovatus|C320605	29	0.00111023	0.00185525		6	1.92193e+17
Cotinus_coggygria|C263996	Cotinus_obovatus|C76433	11	0.0201887	0.0261629		6	1.92193e+17
Cotinus_coggygria|C264766	Cotinus_obovatus|C162877	14	0.00496363	0.00741625		6	1.92193e+17
Cotinus_coggygria|C268870	Cotinus_obovatus|C88273	6	0.0167695	0.0226566		6	1.92193e+17
Cotinus_coggygria|C270896	Cotinus_obovatus|C331965	11	0.000810572	0.00139112		6	1.92193e+17
Cotinus_coggygria|C272112	Cotinus_obovatus|C312682	5	0.000810572	0.00139112		6	1.92193e+17
Cotinus_coggygria|C292927	Cotinus_obovatus|C255302	22	0.0154616	0.0211143		5	193193194194195
Cotinus_coggygria|C293329	Cotinus_obovatus|scaffold11513	6	0.00104699	0.0017729		5	193193194194195
Cotinus_coggygria|C296811	Cotinus_obovatus|C188459	15	0.00630228	0.00919987		5	193193194194195
Cotinus_coggygria|C303323	Cotinus_obovatus|C318442	15	3.98625e-05	8.72851e-05		12	1.8819e+35
Cotinus_coggygria|C308051	Cotinus_obovatus|scaffold6103	7	7.28518e-05	0.00014686		10	1.88189e+29
Cotinus_coggygria|C311819	Cotinus_obovatus|C327435	11	4.46273e-05	9.60621e-05		21	1.88191e+62
Cotinus_coggygria|C315671	Cotinus_obovatus|scaffold11373	9	0.00288844	0.00464344		5	193193194194195
Cotinus_coggygria|C318453	Cotinus_obovatus|C85969	15	0.032017	0.040259		5	193193194194195
Cotinus_coggygria|C326478	Cotinus_obovatus|C314544	12	7.13969e-05	0.000146249		9	1.93193e+26
Cotinus_coggygria|C327098	Cotinus_obovatus|scaffold4277	13	0.00330702	0.0052021		5	193193194194195
Cotinus_coggygria|C335390	Cotinus_obovatus|scaffold15417	7	0.000632521	0.00113141		6	1.93193e+17
Cotinus_coggygria|C343486	Cotinus_obovatus|scaffold17352	4	7.99487e-09	4.23062e-08		38	9.51001e+112
Cotinus_coggygria|C347358	Cotinus_obovatus|C314900	3	0.963154	0.986456		3	193193193
Cotinus_coggygria|C349430	Cotinus_obovatus|scaffold3015	2	0.995942	0.999532		3	193193193
Cotinus_coggygria|C349878	Cotinus_obovatus|C345404	6	4.81914e-10	4.37165e-09		34	9.51001e+100
Cotinus_coggygria|C352020	Cotinus_obovatus|C333509	12	5.59309e-07	1.73249e-06		21	1.61165e+62
Cotinus_coggygria|C352297	Cotinus_obovatus|C323835	19	2.54129e-06	6.45487e-06		32	1.22126e+95
Cotinus_coggygria|C353673	Cotinus_obovatus|scaffold4300	11	7.98366e-07	2.41411e-06		16	1.85186e+47
Cotinus_coggygria|C353937	Cotinus_obovatus|scaffold188	7	0.000703218	0.0012404		13	1.85186e+38
Cotinus_coggygria|C354191	Cotinus_obovatus|C336581	17	6.47818e-05	0.000137121		14	1.88193e+41
Cotinus_coggygria|C354829	Cotinus_obovatus|C335921	8	9.19999e-07	2.65545e-06		19	1.61165e+56
Cotinus_coggygria|C356411	Cotinus_obovatus|scaffold685	10	2.07453e-05	4.79029e-05		10	1.93193e+29
Cotinus_coggygria|C357021	Cotinus_obovatus|scaffold7868	11	1.51541e-05	3.63127e-05		14	1.88193e+41
Cotinus_coggygria|C358649	Cotinus_obovatus|C246948	35	0.0173385	0.0231788		9	1.94195e+26
Cotinus_coggygria|C359001	Cotinus_obovatus|C294888	22	0.916195	0.94599		4	17,18,19,20
Cotinus_coggygria|C359541	Cotinus_obovatus|C233280	1	0.00016553	0.000318521		20	3,4,6,7,8,11,12,14,15,17,18,19,20,23,24,25,26,27,28,29
Cotinus_coggygria|C359951	Cotinus_obovatus|scaffold14350	5	6.60118e-08	2.61984e-07		17	8,11,12,14,15,17,18,19,20,23,24,25,26,27,28,29,32
Cotinus_coggygria|C360241	Cotinus_obovatus|C277659	13	0.000289586	0.000540844		18	1.66167e+53
Cotinus_coggygria|C361895	Cotinus_obovatus|scaffold16866	8	1.12556e-06	3.10753e-06		17	1.50153e+50
Cotinus_coggygria|C362969	Cotinus_obovatus|scaffold14045	9	1.42001e-06	3.83705e-06		9	20,23,24,25,26,27,28,29,32
Cotinus_coggygria|C363699	Cotinus_obovatus|C340680	8	2.83036e-08	1.15954e-07		10	20,23,24,25,25,26,27,28,29,32
Cotinus_coggygria|C363851	Cotinus_obovatus|C230620	7	0.00936288	0.0133605		7	23,24,25,26,27,28,29
Cotinus_coggygria|C363851	Cotinus_obovatus|C230620	7	0.00936288	0.0133605		7	23,24,25,26,27,28,29
Cotinus_coggygria|C363865	Cotinus_obovatus|C341502	8	1.68252e-06	4.45167e-06		9	20,23,24,25,26,27,28,29,32
Cotinus_coggygria|C363993	Cotinus_obovatus|scaffold11681	11	2.09441e-06	5.42836e-06		20	1.57158e+59
Cotinus_coggygria|C364401	Cotinus_obovatus|C338467	9	8.52131e-08	3.09202e-07		18	1.67168e+53
Cotinus_coggygria|C366937	Cotinus_obovatus|C343796	10	5.89289e-09	3.2539e-08		32	20,23,24,25,26,27,28,29,32,102,107,114,118,150,158,167,170,173,185,188,194,195,197,197,203,204,205,206,209,210,224,231
Cotinus_coggygria|C370555	Cotinus_obovatus|scaffold3207	7	3.66869e-07	1.16481e-06		17	1.50157e+50
Cotinus_coggygria|C372765	Cotinus_obovatus|C350012	6	1.96243e-07	6.55866e-07		14	1.6717e+41
Cotinus_coggygria|C373131	Cotinus_obovatus|C348728	7	8.04163e-08	3.00379e-07		14	1.6717e+41
Cotinus_coggygria|C373281	Cotinus_obovatus|C350642	7	2.36552e-08	1.0014e-07		10	20,23,24,25,26,27,28,29,32,35
Cotinus_coggygria|C374651	Cotinus_obovatus|C352458	8	2.68956e-09	1.79776e-08		19	1.50158e+56
Cotinus_coggygria|C374939	Cotinus_obovatus|C354456	8	2.51661e-07	8.19512e-07		9	20,23,24,25,26,27,28,29,32
Cotinus_coggygria|C375377	Cotinus_obovatus|C346864	9	1.39048e-08	6.54039e-08		17	1.50158e+50
Cotinus_coggygria|C375971	Cotinus_obovatus|C352334	6	1.2204e-09	9.68695e-09		17	1.4815e+50
Cotinus_coggygria|C375975	Cotinus_obovatus|scaffold11580	11	0.852904	0.887859		2	20,20
Cotinus_coggygria|C376165	Cotinus_obovatus|C353780	7	4.34658e-13	1.10403e-11		13	17,20,20,21,23,23,24,25,26,27,28,29,32
Cotinus_coggygria|C376287	Cotinus_obovatus|scaffold9408	8	1.16257e-15	7.3823e-14		14	20,20,20,21,23,23,24,24,25,26,27,28,29,32
Cotinus_coggygria|C377291	Cotinus_obovatus|C354806	9	1.21993e-10	1.2911e-09		11	20,21,23,23,24,25,26,27,28,29,32
Cotinus_coggygria|C378023	Cotinus_obovatus|C355462	6	1.46345e-11	2.32322e-10		11	20,21,23,23,24,25,26,27,28,29,32
Cotinus_coggygria|C378445	Cotinus_obovatus|C355464	7	5.50409e-13	1.16503e-11		12	19,20,21,23,23,24,25,26,27,28,29,32
Cotinus_coggygria|C379451	Cotinus_obovatus|C358924	0	0.682519	0.716363		3	23,23,24
Cotinus_coggygria|C379703	Cotinus_obovatus|scaffold13900	11	2.31928e-10	2.26576e-09		18	1.50158e+53
Cotinus_coggygria|C379765	Cotinus_obovatus|C355678	7	6.50965e-11	8.26726e-10		30	20,23,24,25,26,27,28,29,32,102,109,150,158,167,170,173,180,185,188,194,195,197,203,204,205,206,209,210,224,231
Cotinus_coggygria|C381175	Cotinus_obovatus|C356930	4	1.72119e-07	6.07198e-07		14	1.6717e+41
Cotinus_coggygria|C381735	Cotinus_obovatus|scaffold10022	5	8.83604e-11	1.02016e-09		18	1.50158e+53
Gene1	Gene2	NumDiffs	Pvalue	FDRCorrectedPValue	NumRes_ClusterwHighP	ClusterLen_FracTotalLength	Coords
Croomia_japonicaA|scaffold1686	Croomia_paueiflora|scaffold659	7	0.139755	0.168097		2	182185
Croomia_japonicaA|scaffold2786	Croomia_paueiflora|C442466	18	0.00135866	0.0020499		7	1.51156e+20
Croomia_japonicaA|scaffold3645	Croomia_paueiflora|C343948	8	0.000899805	0.00140697		7	1.56157e+20
Croomia_japonicaA|scaffold3645	Croomia_paueiflora|C343948	8	0.000899805	0.00140697		7	1.56157e+20
Croomia_japonicaA|scaffold3921	Croomia_paueiflora|C464040	6	0.00053038	0.000877167		7	1.56157e+20
Croomia_japonicaA|scaffold6528	Croomia_paueiflora|C279666	9	0.00242547	0.00353543		12	1.63164e+35
Croomia_japonicaA|scaffold9666	Croomia_paueiflora|scaffold18728	62	2.70483e-09	7.75384e-09		23	1.90191e+68
Croomia_japonicaA|scaffold10371	Croomia_paueiflora|C443206	16	3.43459e-10	1.15833e-09		25	1.90191e+74
Croomia_japonicaA|scaffold11398	Croomia_paueiflora|C455424	11	8.61911e-10	2.79715e-09		23	1.90191e+68
Croomia_japonicaA|scaffold13579	Croomia_paueiflora|C368117	6	5.33749e-09	1.48072e-08		23	1.90191e+68
Croomia_japonicaA|scaffold13850	Croomia_paueiflora|C468251	8	3.3767e-10	1.15833e-09		23	1.90191e+68
Croomia_japonicaA|scaffold14891	Croomia_paueiflora|C462116	7	6.19441e-08	1.40189e-07		24	1.8919e+71
Croomia_japonicaA|scaffold15270	Croomia_paueiflora|C404678	11	2.06363e-12	8.65719e-12		42	1.90191e+125
Croomia_japonicaA|scaffold16674	Croomia_paueiflora|C341576	8	0.000166812	0.000284076		23	1.90191e+68
Croomia_japonicaA|scaffold17671	Croomia_paueiflora|C384638	14	3.43386e-09	9.68235e-09		26	1.8919e+77
Croomia_japonicaA|scaffold17680	Croomia_paueiflora|C345822	23	0.00718141	0.00965001		23	1.90191e+68
Croomia_japonicaA|scaffold17717	Croomia_paueiflora|scaffold3354	43	0.0001491	0.000256452		41	1.11112e+122
Croomia_japonicaA|scaffold18745	Croomia_paueiflora|scaffold21590	15	7.30143e-12	2.99011e-11		30	1.35136e+89
Croomia_japonicaA|scaffold21453	Croomia_paueiflora|C436968	11	1.50475e-11	6.01902e-11		27	1.35136e+80
Croomia_japonicaA|scaffold22067	Croomia_paueiflora|C405002	7	2.31851e-08	5.73261e-08		28	1.35136e+83
Croomia_japonicaA|scaffold22366	Croomia_paueiflora|scaffold12698	24	1.36477e-12	6.01897e-12		45	1.46147e+134
Croomia_japonicaA|scaffold23433	Croomia_paueiflora|scaffold17783	19	1.73756e-16	1.14946e-15		41	1.46147e+122
Croomia_japonicaA|scaffold23630	Croomia_paueiflora|scaffold7597	11	4.08355e-07	8.67125e-07		20	1.46147e+59
Croomia_japonicaA|scaffold24065	Croomia_paueiflora|C384286	7	1.97506e-08	4.99574e-08		20	1.46147e+59
Croomia_japonicaA|scaffold24196	Croomia_paueiflora|C171018	23	0.0156501	0.0207063		19	1.46147e+56
Croomia_japonicaA|scaffold26151	Croomia_paueiflora|C62267	3	0.104717	0.12774		12	1.56157e+35
Croomia_japonicaA|scaffold26612	Croomia_paueiflora|C348496	16	7.27691e-06	1.3907e-05		21	1.46147e+62
Croomia_japonicaA|scaffold26670	Croomia_paueiflora|C455284	12	2.42634e-10	8.69437e-10		22	1.46147e+65
Croomia_japonicaA|scaffold26808	Croomia_paueiflora|C433310	13	1.77106e-10	6.48132e-10		21	1.46147e+62
Croomia_japonicaA|scaffold26949	Croomia_paueiflora|scaffold21986	8	3.65097e-08	8.72176e-08		21	1.46147e+62
Croomia_japonicaA|scaffold27186	Croomia_paueiflora|scaffold13267	16	8.1976e-10	2.71151e-09		20	1.46147e+59
Croomia_japonicaA|scaffold28223	Croomia_paueiflora|C456976	22	6.42384e-13	3.06917e-12		22	1.40143e+65
Croomia_japonicaA|scaffold28338	Croomia_paueiflora|C448830	8	4.53084e-08	1.05311e-07		21	1.46147e+62
Croomia_japonicaA|scaffold28503	Croomia_paueiflora|C457054	17	0.976336	0.987822		3	2,3,4
Croomia_japonicaA|scaffold29416	Croomia_paueiflora|scaffold13890	22	7.16292e-13	3.32979e-12		20	1.46147e+59
Croomia_japonicaA|scaffold29584	Croomia_paueiflora|C432690	10	2.56506e-10	9.00388e-10		20	1.46147e+59
Croomia_japonicaA|scaffold29958	Croomia_paueiflora|C180610	8	0.019054	0.0250174		19	1.46147e+56
Croomia_japonicaA|scaffold30114	Croomia_paueiflora|C450374	147	5.84801e-18	4.3733e-17		141	215,216,217,218,219,220,221,222,223,224,225,226,227,228,229,230,231,232,233,234,235,236,237,238,239,240,241,242,243,244,245,246,247,248,249,250,251,252,253,254,255,256,257,258,259,260,261,262,263,264,265,266,267,268,269,270,271,272,273,274,275,276,277,278,279,280,281,282,283,284,285,286,287,288,289,290,291,292,293,294,295,296,297,298,299,300,301,302,303,304,305,306,307,308,309,310,311,312,313,314…
Croomia_japonicaA|scaffold30886	Croomia_paueiflora|C395604	10	1.7966e-08	4.61216e-08		116	219,220,221,222,223,224,225,226,227,228,229,230,231,232,233,234,235,236,237,238,239,240,241,242,243,243,244,245,246,247,248,249,250,251,251,252,253,254,255,256,257,258,259,260,261,262,263,264,265,266,267,268,269,270,271,272,273,274,275,276,277,278,279,280,281,282,283,284,285,286,287,288,289,290,291,292,293,294,295,296,297,298,299,300,301,302,303,304,305,306,307,308,309,310,311,312,313,314,315,316…
Croomia_japonicaA|scaffold30923	Croomia_paueiflora|C457174	14	2.47431e-06	4.89175e-06		110	223,224,225,226,227,228,229,230,231,232,233,234,235,236,237,238,239,240,241,242,243,244,245,246,247,248,249,250,251,252,253,254,255,256,257,258,259,260,261,262,263,264,265,266,267,268,269,270,271,272,273,274,275,276,277,278,279,280,281,282,283,284,285,286,287,288,289,290,291,292,293,294,295,296,297,298,299,300,301,302,303,304,305,306,307,308,309,310,311,312,313,314,315,316,317,318,319,320,321,322…
Croomia_japonicaA|scaffold30970	Croomia_paueiflora|C461438	14	3.16516e-08	7.66771e-08		112	223,224,225,226,227,228,229,229,230,231,232,233,234,235,236,237,238,239,240,241,242,243,244,245,246,246,247,248,249,250,251,252,253,254,255,256,257,258,259,260,261,262,263,264,265,266,267,268,269,270,271,272,273,274,275,276,277,278,279,280,281,282,283,284,285,286,287,288,289,290,291,292,293,294,295,296,297,298,299,300,301,302,303,304,305,306,307,308,309,310,311,312,313,314,315,316,317,318,319,320…
Croomia_japonicaA|scaffold31702	Croomia_paueiflora|C433790	3	0.196871	0.23353		105	223,224,225,226,227,228,229,229,230,231,232,233,234,235,236,237,238,239,240,241,242,243,244,245,246,246,247,248,249,250,251,252,253,254,255,256,257,258,259,260,261,262,263,264,265,266,267,268,269,270,271,272,273,274,275,276,277,278,279,280,281,282,283,284,285,286,287,288,289,290,291,292,293,294,295,296,297,298,299,300,301,302,303,304,305,306,307,308,309,310,311,312,313,314,315,316,317,318,319,320…
Croomia_japonicaA|scaffold31828	Croomia_paueiflora|C447758	6	0.000632682	0.0010076		105	223,224,225,226,227,228,229,229,230,231,232,233,234,235,236,237,238,239,240,241,242,243,244,245,246,246,247,248,249,250,251,252,253,254,255,256,257,258,259,260,261,262,263,264,265,266,267,268,269,270,271,272,273,274,275,276,277,278,279,280,281,282,283,284,285,286,287,288,289,290,291,292,293,294,295,296,297,298,299,300,301,302,303,304,305,306,307,308,309,310,311,312,313,314,315,316,317,318,319,320…
Croomia_japonicaA|scaffold32367	Croomia_paueiflora|C456442	15	5.03386e-21	5.4114e-20		135	224,225,226,227,228,229,230,231,232,233,234,235,236,236,237,237,238,239,240,241,242,243,244,245,246,247,248,249,250,251,252,253,254,255,256,257,258,259,260,261,262,263,264,265,266,267,268,269,270,271,272,273,274,275,276,277,278,279,280,281,282,283,284,285,286,287,288,289,290,291,292,293,294,295,296,297,298,299,300,301,302,303,304,305,306,307,308,309,310,311,312,313,314,315,316,317,318,319,320,321…
Croomia_japonicaA|scaffold32960	Croomia_paueiflora|C475365	20	6.84792e-60	1.17784e-57		130	229,230,231,232,233,234,235,236,237,238,239,240,241,242,243,244,245,246,247,248,249,250,251,252,253,254,255,256,257,258,259,260,261,262,263,264,265,266,266,267,268,269,270,271,272,273,274,275,276,277,278,279,280,281,282,283,284,285,286,287,288,289,290,291,292,293,294,295,296,297,298,299,299,300,301,302,303,304,305,306,307,308,309,310,311,312,313,314,315,316,317,318,319,320,321,322,323,324,325,327…
Croomia_japonicaA|scaffold33338	Croomia_paueiflora|C448706	17	3.26554e-28	9.36121e-27		131	229,230,231,232,233,234,235,236,237,237,238,239,239,240,241,242,243,244,245,246,247,248,249,250,251,252,253,254,255,256,257,258,259,260,261,262,263,264,265,266,267,268,269,270,271,272,273,274,275,276,277,278,279,280,281,282,283,284,285,286,287,288,289,290,291,292,293,294,295,296,297,298,299,300,301,302,303,304,305,306,307,308,309,310,311,312,313,314,315,316,317,318,319,320,321,321,322,323,324,325…
Croomia_japonicaA|scaffold33921	Croomia_paueiflora|C439778	16	1.9478e-28	6.70042e-27		132	229,230,231,232,233,234,235,236,237,238,239,240,241,242,242,243,244,245,246,247,248,249,250,251,252,253,254,255,256,257,258,259,260,261,262,263,264,265,266,267,268,269,270,271,272,272,273,274,275,276,277,278,279,280,281,282,283,284,285,286,287,288,289,290,291,292,293,294,295,296,297,298,299,300,301,302,303,304,305,306,307,308,309,310,311,312,313,314,315,316,317,318,319,320,321,322,323,324,325,327…
Croomia_japonicaA|scaffold34329	Croomia_paueiflora|C434092	85	4.81219e-19	3.94141e-18		74	293,294,295,296,296,297,297,298,299,300,301,302,303,304,305,305,306,307,308,309,310,311,312,313,314,314,315,316,317,317,318,319,320,320,321,322,323,323,324,325,326,327,328,329,329,331,332,333,334,336,337,338,338,341,342,343,344,345,349,350,354,355,358,359,359,360,361,362,363,364,365,366,367,368
Croomia_japonicaA|scaffold34776	Croomia_paueiflora|scaffold19854	6	8.98987e-07	1.86296e-06		53	2.93294e+158
Croomia_japonicaA|scaffold35633	Croomia_paueiflora|C455220	11	4.49746e-08	1.05311e-07		54	2.93294e+161
Croomia_japonicaA|scaffold35727	Croomia_paueiflora|C455546	10	1.29674e-14	6.75878e-14		77	293,294,295,296,296,296,297,297,298,299,300,301,302,303,304,305,305,306,307,308,309,310,311,312,313,314,314,315,316,317,317,318,319,320,320,321,321,322,323,323,324,325,326,327,328,329,329,331,332,333,334,336,337,338,338,341,342,343,344,345,349,350,354,355,358,359,359,360,361,362,363,364,365,366,367,368,368
Croomia_japonicaA|scaffold35923	Croomia_paueiflora|scaffold19646	17	3.33677e-29	1.43481e-27		76	293,294,295,296,296,297,297,298,299,300,301,302,303,304,305,305,306,307,308,309,310,311,312,313,314,314,315,316,317,317,318,319,320,320,321,322,323,323,324,325,326,327,328,329,329,331,332,333,334,336,337,338,338,341,342,343,344,345,349,350,354,355,358,359,359,360,361,362,363,364,365,365,366,367,368,369
Croomia_japonicaA|scaffold35952	Croomia_paueiflora|C462958	15	2.50954e-23	3.924e-22		76	293,294,295,296,296,297,297,298,299,300,301,302,303,304,305,305,306,307,308,309,310,311,312,313,314,314,315,316,317,317,318,319,320,320,321,322,323,323,324,325,326,327,328,329,329,331,332,333,334,335,336,337,338,338,341,342,343,344,345,349,350,354,355,358,359,359,360,361,362,363,364,365,365,366,367,368
Croomia_japonicaA|scaffold36652	Croomia_paueiflora|C417066	14	1.13472e-18	8.87141e-18		76	293,294,295,296,296,297,297,298,299,300,301,302,303,304,305,305,306,307,308,309,310,311,312,313,314,314,315,316,317,317,318,319,320,320,321,322,323,323,324,325,326,327,328,329,329,331,332,333,334,336,337,338,338,341,342,343,344,345,349,350,353,354,355,358,359,359,359,360,361,362,363,364,365,366,367,368
Croomia_japonicaA|scaffold37366	Croomia_paueiflora|scaffold3366	5	2.35625e-09	6.9875e-09		77	293,294,295,296,296,297,297,298,299,300,301,302,303,304,305,305,305,306,307,308,309,310,311,312,313,314,314,315,316,317,317,318,319,320,320,321,322,323,323,324,325,326,327,328,329,329,331,332,333,334,336,337,338,338,341,342,343,344,345,349,350,353,354,355,358,359,359,359,360,361,362,363,364,365,366,367,368
Croomia_japonicaA|scaffold37554	Croomia_paueiflora|scaffold20561	27	9.05049e-15	5.02156e-14		77	293,294,295,296,296,297,297,297,298,299,300,301,302,303,304,304,305,305,306,307,308,309,310,311,312,313,314,314,315,316,317,317,318,319,320,320,321,322,323,323,324,325,326,327,328,329,329,331,332,333,334,336,337,338,338,341,342,343,344,345,349,350,354,355,358,358,359,359,360,361,362,363,364,365,366,367,368
Croomia_japonicaA|scaffold37572	Croomia_paueiflora|C467046	6	5.32631e-16	3.39306e-15		77	293,294,295,296,296,297,297,297,298,299,300,301,302,303,304,304,305,305,306,307,308,309,310,311,312,313,314,314,315,316,317,317,318,319,320,320,321,322,323,323,324,325,326,327,328,329,329,331,332,333,334,336,337,338,338,341,342,343,344,345,349,350,354,355,358,358,359,359,360,361,362,363,364,365,366,367,368
Croomia_japonicaA|scaffold37584	Croomia_paueiflora|C324030	8	3.63876e-06	7.03222e-06		55	2.93294e+164
Croomia_japonicaA|scaffold38100	Croomia_paueiflora|C464210	23	7.07862e-22	8.11682e-21		80	293,294,295,296,296,297,297,298,299,300,301,302,303,304,304,305,305,306,307,308,309,310,311,312,313,314,314,315,316,316,317,317,318,319,320,320,321,322,323,323,323,324,325,325,326,327,328,329,329,331,332,333,334,336,337,338,338,341,341,342,343,344,345,349,350,354,355,358,359,359,360,361,362,363,364,365,366,367,367,368
Croomia_japonicaA|scaffold38750	Croomia_paueiflora|C475485	16	5.48206e-28	1.34702e-26		76	293,294,295,296,296,297,297,298,299,300,301,302,302,303,304,305,305,306,307,308,309,310,311,312,313,314,314,315,316,317,317,318,319,320,320,321,322,323,323,324,325,326,327,328,329,329,331,332,333,334,336,337,338,338,341,342,343,344,345,349,350,354,355,358,359,359,360,361,362,362,363,364,365,366,367,368
Croomia_japonicaA|C158617	Croomia_paueiflora|scaffold20601	5	0.511803	0.553649		4	296296297297
Croomia_japonicaA|C163657	Croomia_paueiflora|C297339	23	0.493714	0.537461		4	296296297297
Croomia_japonicaA|C164215	Croomia_paueiflora|C235552	17	0.493714	0.537461		4	296296297297
Croomia_japonicaA|C187731	Croomia_paueiflora|scaffold11340	4	0.569987	0.60893		4	296296297297
Croomia_japonicaA|C210089	Croomia_paueiflora|C261241	5	0.590666	0.626234		4	296296297297
Croomia_japonicaA|C382522	Croomia_paueiflora|C138940	15	0.326186	0.374027		42	2.96296e+125
Croomia_japonicaA|C428020	Croomia_paueiflora|C366437	1	0.418456	0.470421		14	3.14314e+41
Croomia_japonicaA|C433980	Croomia_paueiflora|C192239	17	0.355241	0.404645		14	3.14314e+41
Croomia_japonicaA|C435522	Croomia_paueiflora|C192441	12	0.385972	0.436757		14	3.14314e+41
Croomia_japonicaA|C459562	Croomia_paueiflora|C234142	15	0.277591	0.322605		42	2.96296e+125
Croomia_japonicaA|C461530	Croomia_paueiflora|C313410	18	0.326186	0.374027		42	2.96296e+125
Croomia_japonicaA|C512748	Croomia_paueiflora|C403546	19	0.022859	0.0290116		42	2.96296e+125
Croomia_japonicaA|C565571	Croomia_paueiflora|C345036	24	0.000976281	0.00149929		45	2.93294e+134
Croomia_japonicaA|C580942	Croomia_paueiflora|C329944	9	0.00646395	0.0088944		45	2.93294e+134
Croomia_japonicaA|C602520	Croomia_paueiflora|C92223	11	0.549943	0.591188		4	296296297297
Croomia_japonicaA|C617425	Croomia_paueiflora|C314994	6	0.00290429	0.00416282		45	2.93294e+134
Croomia_japonicaA|C623681	Croomia_paueiflora|C343336	12	0.00646395	0.0088944		45	2.93294e+134
Croomia_japonicaA|C624573	Croomia_paueiflora|C275306	43	0.115126	0.139448		32	2.94295e+95
Croomia_japonicaA|C624699	Croomia_paueiflora|scaffold4634	7	0.0873199	0.10805		32	2.94295e+95
Croomia_japonicaA|C632467	Croomia_paueiflora|C401462	4	0.462574	0.513308		12	3.58359e+35
Croomia_japonicaA|C644547	Croomia_paueiflora|C469953	11	0.000945442	0.00146501		63	2.94295e+188
Croomia_japonicaA|C654367	Croomia_paueiflora|C371349	8	0.743624	0.765888		2	359359
Croomia_japonicaA|C655745	Croomia_paueiflora|C457934	14	0.000566074	0.000918535		63	2.94295e+188
Croomia_japonicaA|C657543	Croomia_paueiflora|C423633	8	0.000337037	0.00056282		63	2.94295e+188
Croomia_japonicaA|C659741	Croomia_paueiflora|scaffold18954	9	0.00675793	0.00915247		42	2.94295e+125
Croomia_japonicaA|C674386	Croomia_paueiflora|C338598	6	0.0229394	0.0290116		32	2.94295e+95
Croomia_japonicaA|C675158	Croomia_paueiflora|C233070	3	0.689429	0.714348		3	173173174
Croomia_japonicaA|C682844	Croomia_paueiflora|C335938	26	0.00201524	0.00296257		63	2.94295e+188
Croomia_japonicaA|C689132	Croomia_paueiflora|C389201	17	0.00156878	0.00232612		63	2.94295e+188
Croomia_japonicaA|C690604	Croomia_paueiflora|C240118	4	0.100382	0.123326		32	2.94295e+95
Croomia_japonicaA|C700256	Croomia_paueiflora|scaffold19361	16	0.150257	0.179473		32	2.94295e+95
Croomia_japonicaA|C704614	Croomia_paueiflora|C470067	20	0.00257427	0.00372079		42	2.94295e+125
Croomia_japonicaA|C710668	Croomia_paueiflora|scaffold15425	7	0.0567572	0.0712572		32	2.94295e+95
Croomia_japonicaA|C711724	Croomia_paueiflora|C409994	10	0.00379781	0.00535429		42	2.94295e+125
Croomia_japonicaA|C714184	Croomia_paueiflora|C360633	5	0.224193	0.264118		3	155155155
Croomia_japonicaA|C715980	Croomia_paueiflora|C323770	9	0.00675793	0.00915247		42	2.94295e+125
Croomia_japonicaA|C716154	Croomia_paueiflora|C203539	1	0.462574	0.513308		12	3.58359e+35
Croomia_japonicaA|C722280	Croomia_paueiflora|C248895	27	0.0757908	0.0944639		32	2.94295e+95
Croomia_japonicaA|C726212	Croomia_paueiflora|C409970	11	0.00312803	0.00444646		42	2.94295e+125
Croomia_japonicaA|C733848	Croomia_paueiflora|C443686	12	0.000117871	0.000204786		63	2.94295e+188
Croomia_japonicaA|C747324	Croomia_paueiflora|C342514	10	0.614749	0.644737		6	3.58359e+17
Croomia_japonicaA|C747340	Croomia_paueiflora|C322244	5	0.593466	0.626234		9	3.58359e+26
Croomia_japonicaA|C747616	Croomia_paueiflora|C454748	8	9.39487e-07	1.92371e-06		63	2.94295e+188
Croomia_japonicaA|C747810	Croomia_paueiflora|C255393	13	0.48773	0.537461		12	3.58359e+35
Croomia_japonicaA|C753567	Croomia_paueiflora|C452062	6	1.85533e-06	3.75431e-06		64	2.94295e+191
Croomia_japonicaA|C754369	Croomia_paueiflora|C442538	11	0.0196386	0.0252078		32	2.94295e+95
Croomia_japonicaA|C754369	Croomia_paueiflora|C442538	11	0.0196386	0.0252078		32	2.94295e+95
Croomia_japonicaA|C754369	Croomia_paueiflora|C442538	11	0.0196386	0.0252078		32	2.94295e+95
Croomia_japonicaA|C762047	Croomia_paueiflora|C401826	19	1.84445e-09	5.66509e-09		67	294,295,296,297,298,299,300,301,302,303,304,305,306,306,307,308,309,310,311,312,313,314,315,316,317,318,319,320,320,321,322,323,324,325,327,328,329,331,332,333,334,335,336,337,338,341,342,343,344,345,346,349,350,354,355,358,359,359,360,361,362,363,364,365,366,367,368
Croomia_japonicaA|C766885	Croomia_paueiflora|C366425	7	0.00150461	0.00225037		45	2.94295e+134
Croomia_japonicaA|C768485	Croomia_paueiflora|C430734	7	3.65332e-07	7.85465e-07		69	294,295,296,297,298,299,300,301,302,303,304,305,306,306,307,308,309,309,310,311,312,313,314,314,315,316,317,318,319,320,320,321,322,323,324,325,327,328,329,331,332,333,334,335,336,337,338,341,342,343,344,345,346,349,350,354,355,358,359,359,360,361,362,363,364,365,366,367,368
Croomia_japonicaA|C769703	Croomia_paueiflora|C408590	10	8.86502e-06	1.65737e-05		67	294,295,296,297,298,299,300,301,302,303,304,305,306,306,307,308,309,310,311,312,313,314,315,316,317,318,319,320,320,321,322,323,324,325,327,328,329,331,332,333,334,335,336,337,338,341,342,343,344,345,346,349,350,354,355,358,359,359,360,361,362,363,364,365,366,367,368
Croomia_japonicaA|C770117	Croomia_paueiflora|scaffold15033	9	8.20479e-09	2.24004e-08		67	294,295,296,297,298,299,300,301,302,303,304,305,306,306,307,308,309,310,311,312,313,314,315,316,317,318,319,320,320,321,322,323,324,325,327,328,329,331,332,333,334,335,336,337,338,341,342,343,344,345,346,349,350,354,355,358,359,359,360,361,362,363,364,365,366,367,368
Croomia_japonicaA|C774625	Croomia_paueiflora|C437836	18	3.38614e-15	1.94139e-14		68	294,295,296,297,298,299,300,301,302,302,303,304,305,306,307,308,309,310,311,312,313,314,315,316,317,318,319,320,320,321,322,323,324,325,327,328,329,331,332,333,334,336,337,338,341,342,343,344,345,346,346,349,350,350,354,355,358,359,359,360,361,362,363,364,365,366,367,368
Croomia_japonicaA|C776111	Croomia_paueiflora|C400312	13	5.91792e-08	1.35718e-07		66	294,295,296,297,298,299,300,301,302,303,304,305,306,307,308,309,310,310,311,312,313,314,315,316,317,318,319,320,321,322,323,324,325,327,328,329,331,332,333,334,336,337,338,338,341,342,343,344,345,346,349,350,354,355,358,359,359,360,361,362,363,364,365,366,367,368
Croomia_japonicaA|C778913	Croomia_paueiflora|C436448	1	9.3501e-05	0.000165796		66	294,295,296,297,298,299,300,301,302,303,304,305,306,307,308,309,310,310,311,312,313,314,315,316,317,318,319,320,321,322,323,324,325,327,328,329,331,332,333,334,336,337,338,338,341,342,343,344,345,346,349,350,354,355,358,359,359,360,361,362,363,364,365,366,367,368
Croomia_japonicaA|C779825	Croomia_paueiflora|C413169	11	1.44046e-09	4.5047e-09		68	294,295,296,297,298,299,299,300,301,302,303,304,305,306,307,308,309,310,310,311,312,313,314,315,316,317,318,319,320,320,321,322,323,324,325,327,328,329,331,332,333,334,336,337,338,338,341,342,343,344,345,346,349,350,354,355,358,359,359,360,361,362,363,364,365,366,367,368
Croomia_japonicaA|C785903	Croomia_paueiflora|C465016	6	0.000544678	0.000892234		46	2.94295e+137
Croomia_japonicaA|C787573	Croomia_paueiflora|C425746	7	0.00559836	0.0078286		46	2.94295e+137
Croomia_japonicaA|C788227	Croomia_paueiflora|scaffold9681	1	0.661517	0.689581		13	3.1031e+38
Croomia_japonicaA|C788301	Croomia_paueiflora|C439002	9	0.231219	0.270541		35	2.94295e+104
Croomia_japonicaA|C788317	Croomia_paueiflora|scaffold20278	11	0.763351	0.781526		2	170170
Croomia_japonicaA|C789715	Croomia_paueiflora|C466984	17	9.65841e-16	5.93302e-15		65	294,295,296,297,298,299,300,301,302,303,304,305,306,307,308,309,310,311,312,313,314,315,316,317,318,319,320,321,322,323,324,325,327,328,329,331,332,333,334,336,337,338,341,342,343,344,345,346,347,349,350,354,355,358,359,359,360,361,362,363,364,365,366,367,368
Croomia_japonicaA|C790221	Croomia_paueiflora|C406162	11	2.1577e-09	6.51094e-09		69	294,295,296,297,298,299,300,301,302,303,304,305,306,307,308,309,310,311,312,313,314,315,316,317,318,319,320,321,322,323,324,325,327,328,329,331,332,333,334,336,337,338,341,341,342,343,343,344,345,346,347,349,350,351,354,355,356,358,359,359,360,361,362,363,364,365,366,367,368
Croomia_japonicaA|C793243	Croomia_paueiflora|C451786	7	7.26715e-08	1.6025e-07		69	294,295,296,297,298,299,300,301,302,303,304,305,306,307,308,309,310,311,312,313,314,315,316,317,318,319,320,321,322,323,324,325,327,328,329,331,332,333,334,336,337,338,341,341,342,343,343,344,345,346,347,349,350,351,354,355,356,358,359,359,360,361,362,363,364,365,366,367,368
Croomia_japonicaA|C795387	Croomia_paueiflora|C473479	12	2.04851e-06	4.09701e-06		66	294,294,295,296,297,298,299,300,301,302,303,304,305,306,307,308,309,310,311,312,313,314,315,316,317,318,319,320,321,322,323,324,325,327,328,329,331,332,333,334,336,337,338,341,342,343,344,345,346,347,349,350,354,355,358,359,359,360,361,362,363,364,365,366,367,368
Croomia_japonicaA|C797670	Croomia_paueiflora|scaffold11879	41	1.22066e-12	5.52509e-12		77	294,295,296,297,298,299,300,301,302,303,304,305,306,307,308,309,310,311,312,312,313,313,314,314,315,316,317,318,319,320,320,321,322,323,323,324,325,327,328,329,329,331,332,333,334,336,336,337,337,338,341,341,342,343,344,345,347,349,350,350,353,354,355,358,359,359,360,360,361,362,362,363,364,365,366,367,368
Croomia_japonicaA|C797796	Croomia_paueiflora|C444692	7	3.03657e-05	5.4978e-05		77	294,295,296,297,298,299,300,301,302,303,304,305,306,307,308,309,310,311,312,312,313,313,314,314,315,316,317,318,319,320,320,321,322,323,323,324,325,327,328,329,329,331,332,333,334,336,336,337,337,338,341,341,342,343,344,345,347,349,350,350,353,354,355,358,359,359,360,360,361,362,362,363,364,365,366,367,368
Croomia_japonicaA|C797878	Croomia_paueiflora|C439788	11	8.81151e-21	8.91517e-20		78	294,295,296,297,298,299,300,301,302,303,304,305,306,307,308,309,310,311,312,312,313,313,314,314,315,316,317,318,319,320,320,321,322,323,323,324,325,327,328,329,329,329,331,332,333,334,336,336,337,337,338,341,341,342,343,344,345,347,349,350,350,353,354,355,358,359,359,360,360,361,362,362,363,364,365,366,367,368
Croomia_japonicaA|C798778	Croomia_paueiflora|scaffold14714	7	9.7793e-05	0.000171637		77	294,295,296,297,298,299,300,301,302,303,304,305,306,307,308,309,310,311,312,312,313,313,314,314,315,316,317,318,319,320,320,321,322,323,323,324,325,327,328,329,329,331,332,333,334,336,336,337,337,338,341,341,342,343,344,345,347,349,350,350,353,354,355,358,359,359,360,360,361,362,362,363,364,365,366,367,368
Croomia_japonicaA|C798984	Croomia_paueiflora|C429346	58	3.94601e-11	1.54253e-10		71	294,295,296,296,297,298,299,300,301,302,303,303,304,305,306,307,308,309,309,310,311,312,313,314,315,316,317,318,319,320,321,321,322,322,323,324,325,325,327,328,329,331,331,332,332,333,334,336,337,337,338,341,342,343,344,345,349,350,354,355,358,359,360,361,362,363,364,365,366,367,368
Croomia_japonicaA|C802010	Croomia_paueiflora|scaffold2313	9	0.888032	0.903796		4	321321322322
Croomia_japonicaA|C804544	Croomia_paueiflora|C445250	6	9.38676e-14	4.74859e-13		71	294,295,296,296,297,298,299,300,301,302,303,303,304,305,306,307,308,309,309,310,311,312,313,314,315,316,317,318,319,320,321,321,322,322,323,324,325,325,327,328,329,331,331,332,332,333,334,336,337,337,338,341,342,343,344,345,349,350,354,355,358,359,360,361,362,363,364,365,366,367,368
Croomia_japonicaA|C805306	Croomia_paueiflora|C475057	21	1.95814e-15	1.16138e-14		74	294,295,296,296,297,298,299,300,301,302,302,303,303,304,305,306,307,308,309,309,310,310,311,312,313,314,315,316,317,318,319,320,321,321,322,322,323,324,325,325,327,328,329,331,331,332,332,333,334,336,337,337,338,341,342,343,344,345,349,350,354,355,358,359,360,361,361,362,363,364,365,366,367,368
Croomia_japonicaA|C805626	Croomia_paueiflora|C437378	6	1.36438e-09	4.34582e-09		54	2.94295e+161
Croomia_japonicaA|C807182	Croomia_paueiflora|C432358	14	2.78224e-17	1.99394e-16		76	294,295,296,296,297,298,299,300,301,302,302,303,303,304,305,306,307,308,309,309,310,310,311,311,312,313,314,314,315,316,317,318,319,320,321,321,322,322,323,324,325,325,327,328,329,331,331,332,332,333,334,336,337,337,338,341,342,343,344,345,349,350,354,355,358,359,360,361,361,362,363,364,365,366,367,368
Croomia_japonicaA|C808000	Croomia_paueiflora|C436408	7	6.70646e-08	1.49807e-07		55	2.94295e+164
Croomia_japonicaA|C808012	Croomia_paueiflora|C439270	3	7.714e-06	1.45803e-05		55	2.94295e+164
Croomia_japonicaA|C809298	Croomia_paueiflora|C432220	6	2.76419e-06	5.40274e-06		55	2.94295e+164
Croomia_japonicaA|C811372	Croomia_paueiflora|scaffold17007	12	1.60319e-24	3.06388e-23		76	293,294,295,296,296,296,297,298,299,300,301,302,302,303,303,304,305,306,307,308,309,309,310,310,311,312,313,314,315,316,317,318,319,320,321,321,322,322,323,324,325,325,327,328,329,331,331,332,332,333,334,336,337,337,338,341,342,343,344,345,349,350,354,355,358,359,360,361,361,362,363,364,365,366,367,368
Croomia_japonicaA|C812196	Croomia_paueiflora|scaffold4100	7	5.549e-05	9.94195e-05		53	2.94295e+158
Croomia_japonicaA|C813666	Croomia_paueiflora|C477415	30	2.00089e-20	1.91196e-19		75	294,295,296,296,297,298,299,300,301,302,303,303,304,305,306,307,308,309,309,310,311,312,313,314,315,316,317,318,319,320,321,321,322,322,323,324,325,325,327,328,329,331,331,332,332,332,333,334,336,337,337,338,338,339,341,342,343,344,345,349,350,353,354,355,358,359,360,361,362,363,364,365,366,367,368
Croomia_japonicaA|C814132	Croomia_paueiflora|C343136	6	0.00122759	0.00186854		54	2.94295e+161
Croomia_japonicaA|C817872	Croomia_paueiflora|scaffold11114	25	1.00218e-08	2.69335e-08		56	2.94295e+167
Croomia_japonicaA|C818332	Croomia_paueiflora|C442982	14	1.16054e-13	5.70324e-13		72	294,295,296,296,297,298,299,300,301,302,303,303,304,305,306,307,308,309,309,310,311,312,313,314,315,316,317,318,319,320,321,321,322,322,323,324,325,325,327,328,329,331,331,332,332,333,334,335,336,337,337,338,341,342,343,344,345,349,350,354,355,358,359,360,361,362,363,364,365,366,367,368
Croomia_japonicaA|C819290	Croomia_paueiflora|C393323	12	6.71291e-11	2.51004e-10		54	2.94295e+161
Croomia_japonicaA|C819366	Croomia_paueiflora|scaffold13351	18	6.33148e-22	7.77868e-21		73	294,295,296,296,297,298,299,300,301,302,303,303,304,305,306,307,308,309,309,310,311,312,313,314,314,315,316,317,318,319,320,321,321,322,322,323,324,325,325,327,328,329,331,331,332,332,333,334,336,337,337,338,341,342,343,344,345,349,350,354,355,358,359,360,361,362,363,364,365,365,366,367,368
Croomia_japonicaA|C821086	Croomia_paueiflora|C462054	7	1.48842e-16	1.02404e-15		74	294,295,296,296,297,298,299,300,301,302,303,303,304,305,306,307,308,309,309,310,311,312,313,314,314,315,316,317,318,319,320,321,321,322,322,323,324,325,325,327,328,329,331,331,332,332,333,334,336,337,337,338,341,342,343,344,345,349,350,353,354,355,358,359,360,361,362,363,364,365,365,366,367,368
Croomia_japonicaA|C821948	Croomia_paueiflora|C447318	18	2.03504e-19	1.75013e-18		73	294,295,296,296,297,298,299,300,301,302,302,303,303,304,305,306,307,308,309,309,310,311,312,313,314,315,316,317,318,319,320,321,321,322,322,323,324,325,325,327,328,329,331,331,332,332,333,334,336,337,337,338,341,342,343,344,345,349,350,354,355,358,359,360,361,362,363,364,365,365,366,367,368
Croomia_japonicaA|C822132	Croomia_paueiflora|scaffold20821	4	1	1		2	225225
Croomia_japonicaA|C823564	Croomia_paueiflora|C385480	6	7.81018e-07	1.63823e-06		52	2.94295e+155
Croomia_japonicaA|C826712	Croomia_paueiflora|scaffold15488	17	3.3294e-20	3.01398e-19		76	294,295,296,296,297,298,299,300,301,302,303,303,304,305,306,307,308,309,309,310,311,312,312,313,313,314,315,316,317,318,319,320,321,321,322,322,323,324,325,325,327,328,328,329,331,331,332,332,333,334,336,336,337,337,338,341,342,343,344,345,347,349,350,354,355,358,359,360,361,362,363,364,365,366,367,368
Croomia_japonicaA|C826770	Croomia_paueiflora|C460092	8	1.61073e-08	4.26223e-08		53	2.94295e+158
Croomia_japonicaA|C827024	Croomia_paueiflora|C393397	13	1.53284e-12	6.59121e-12		74	293,294,295,296,296,297,298,299,300,301,302,302,303,303,304,305,306,307,308,309,309,310,311,312,313,314,315,316,317,318,319,320,321,321,322,322,323,324,325,325,327,328,329,331,331,332,332,333,334,336,337,337,338,341,342,343,344,345,349,350,354,355,358,359,360,361,362,363,364,364,365,366,367,368
Croomia_japonicaA|C829532	Croomia_paueiflora|C393707	8	2.58814e-09	7.54509e-09		74	293,294,295,296,296,297,298,299,300,301,302,302,303,303,304,305,306,307,308,309,309,310,311,312,313,314,315,316,317,318,319,320,321,321,322,322,323,324,325,325,327,328,329,331,331,332,332,333,334,336,337,337,338,341,342,343,344,345,349,350,354,355,358,359,360,361,362,363,364,364,365,366,367,368
Croomia_japonicaA|C830138	Croomia_paueiflora|C382977	6	2.7237e-05	4.98379e-05		53	2.93294e+158
Croomia_japonicaA|C832474	Croomia_paueiflora|C457002	9	9.94443e-15	5.34513e-14		74	293,294,295,296,296,297,298,299,300,301,302,302,303,303,304,305,306,307,308,309,309,310,311,312,313,314,315,316,317,318,319,320,321,321,322,322,323,324,325,325,327,328,329,331,331,332,332,333,334,336,337,337,338,341,342,343,344,345,349,350,354,355,358,359,360,361,362,363,364,364,365,366,367,368
Croomia_japonicaA|C834996	Croomia_paueiflora|scaffold5379	20	3.4368e-23	4.92609e-22		72	294,295,296,296,297,298,299,300,301,302,303,303,304,305,306,307,308,309,309,310,311,312,313,314,315,316,317,318,319,320,321,321,322,322,323,324,325,325,327,328,329,331,331,332,332,333,334,335,336,337,337,338,341,342,343,344,345,349,350,354,355,358,359,360,361,362,363,364,365,366,367,368
Croomia_japonicaA|C837496	Croomia_paueiflora|C410897	14	1.69133e-07	3.68238e-07		51	2.94295e+152
Croomia_japonicaA|C839328	Croomia_paueiflora|scaffold19195	13	3.9807e-26	8.5585e-25		72	294,295,296,296,297,298,299,300,301,302,303,303,304,305,306,307,308,309,309,310,311,312,313,314,315,316,317,318,319,320,321,321,322,322,323,324,325,325,327,328,329,331,331,332,332,333,334,336,337,337,338,341,342,343,344,345,349,350,354,355,358,359,360,361,362,363,364,365,366,367,368,369
Croomia_japonicaA|C840180	Croomia_paueiflora|C417798	7	2.33304e-08	5.73261e-08		51	2.94295e+152
Croomia_japonicaA|C840696	Croomia_paueiflora|C460144	7	1.76927e-08	4.61084e-08		54	2.93294e+161
Croomia_japonicaA|C841766	Croomia_paueiflora|scaffold11372	16	3.26546e-22	4.32045e-21		72	294,295,296,296,297,298,299,300,301,302,303,303,304,305,306,307,308,309,309,310,311,312,313,314,315,316,317,318,319,320,321,321,322,322,322,323,324,325,325,327,328,329,331,331,332,332,333,334,336,337,337,338,341,342,343,344,345,349,350,354,355,358,359,360,361,362,363,364,365,366,367,368
Croomia_japonicaA|C842732	Croomia_paueiflora|scaffold20295	18	6.77342e-24	1.16503e-22		71	294,295,296,296,297,298,299,300,301,302,303,303,304,305,306,307,308,309,309,310,311,312,313,314,315,316,317,318,319,320,321,321,322,322,323,324,325,325,327,328,329,331,331,332,332,333,334,336,337,337,338,341,342,343,344,345,349,350,354,355,358,359,360,361,362,363,364,365,366,367,368
Croomia_japonicaA|C843334	Croomia_paueiflora|C449502	9	6.02514e-11	2.30294e-10		72	294,295,296,296,297,298,299,300,301,302,303,303,304,305,306,307,308,309,309,310,311,312,313,314,315,316,317,318,319,320,321,321,322,322,323,324,324,325,325,327,328,329,331,331,332,332,333,334,336,337,337,338,341,342,343,344,345,349,350,354,355,358,359,360,361,362,363,364,365,366,367,368
Croomia_japonicaA|C845336	Croomia_paueiflora|C327886	6	1.20866e-05	2.23537e-05		52	2.94295e+155
Croomia_japonicaA|C846706	Croomia_paueiflora|C402512	6	0.00864412	0.0115255		52	2.94295e+155
Croomia_japonicaA|C847966	Croomia_paueiflora|C436566	13	0.000187238	0.000315735		51	2.94295e+152
Croomia_japonicaA|C849152	Croomia_paueiflora|scaffold21470	15	5.19399e-43	4.46683e-41		76	294,295,296,296,297,298,299,300,301,302,303,303,304,305,306,307,308,308,309,309,310,311,312,313,313,314,315,316,317,318,319,319,320,321,321,322,322,323,324,325,325,327,328,329,331,331,332,332,333,334,336,337,337,338,341,342,343,344,345,349,349,350,354,355,358,358,359,360,361,362,363,364,365,366,367,368
Croomia_japonicaA|C849198	Croomia_paueiflora|C283966	9	0.000599645	0.000963916		51	2.94295e+152
Croomia_japonicaA|C854138	Croomia_paueiflora|C475099	17	5.10791e-35	2.92853e-33		73	294,295,296,296,297,298,299,300,301,302,303,303,304,305,306,307,308,309,309,310,311,312,313,314,315,316,317,318,318,319,320,321,321,322,322,323,324,325,325,327,328,329,331,331,332,332,333,334,335,336,337,337,338,341,342,343,344,345,349,350,354,355,358,359,360,361,362,363,364,365,366,367,368
Croomia_japonicaA|C855944	Croomia_paueiflora|C282220	7	0.999716	1		2	225225
Gene1	Gene2	NumDiffs	Pvalue	FDRCorrectedPValue	NumRes_ClusterwHighP	ClusterLen_FracTotalLength	Coords
Dysosma_pleianthaA|scaffold127	Dysosma_versipellisA|C757856	8	0.037687	0.0476502		4	967100010741084
Dysosma_pleianthaA|scaffold443	Dysosma_versipellisA|scaffold391	11	0.0119203	0.0172531		3	15,16,20
Dysosma_pleianthaA|scaffold481	Dysosma_versipellisA|C734955	7	0.084434	0.0947729		4	331344372376
Dysosma_pleianthaA|scaffold1502	Dysosma_versipellisA|scaffold25250	10	0.0742888	0.0851226		2	99104
Dysosma_pleianthaA|scaffold2787	Dysosma_versipellisA|scaffold60	8	0.0382561	0.0478201		2	735737
Dysosma_pleianthaA|scaffold4459	Dysosma_versipellisA|scaffold8689	2	0.570938	0.581511		2	735737
Dysosma_pleianthaA|scaffold4741	Dysosma_versipellisA|C753132	8	0.033773	0.043198		3	659672677
Dysosma_pleianthaA|scaffold5206	Dysosma_versipellisA|scaffold15754	14	0.0438799	0.053631		2	117118
Dysosma_pleianthaA|scaffold8222	Dysosma_versipellisA|scaffold21621	8	0.0270881	0.0358999		3	11,15,19
Dysosma_pleianthaA|scaffold8759	Dysosma_versipellisA|C740407	6	0.107582	0.119536		2	617621
Dysosma_pleianthaA|scaffold9553	Dysosma_versipellisA|C532505	11	0.0585978	0.0685719		3	127128131
Dysosma_pleianthaA|scaffold11845	Dysosma_versipellisA|scaffold27765	8	0.0195761	0.0276073		4	131156178201
Dysosma_pleianthaA|scaffold12284	Dysosma_versipellisA|scaffold21631	15	0.38075	0.395117		5	2,3,4,5,6
Dysosma_pleianthaA|scaffold13590	Dysosma_versipellisA|scaffold30413	8	1.01023e-08	3.26841e-08		7	14,15,17,18,19,20,23
Dysosma_pleianthaA|scaffold13596	Dysosma_versipellisA|C611876	16	0.0688417	0.0797114		3	141143144
Dysosma_pleianthaA|scaffold14108	Dysosma_versipellisA|C637602	6	0.00434502	0.007468		9	1.05108e+26
Dysosma_pleianthaA|scaffold17379	Dysosma_versipellisA|scaffold12845	7	0.0105864	0.0155268		9	9.61051e+25
Dysosma_pleianthaA|scaffold18491	Dysosma_versipellisA|C743971	3	0.000110765	0.000210071		5	141141143144145
Dysosma_pleianthaA|scaffold18891	Dysosma_versipellisA|scaffold28953	7	5.85212e-06	1.39942e-05		9	1.05108e+26
Dysosma_pleianthaA|scaffold19557	Dysosma_versipellisA|scaffold26197	11	1.44857e-07	4.08571e-07		7	1.28136e+20
Dysosma_pleianthaA|scaffold19695	Dysosma_versipellisA|C578131	12	0.00592206	0.0093061		5	136136141143144
Dysosma_pleianthaA|scaffold19882	Dysosma_versipellisA|scaffold23148	8	2.43641e-05	5.15394e-05		6	1.36136e+17
Dysosma_pleianthaA|scaffold21209	Dysosma_versipellisA|C744487	9	0.00027862	0.000519461		7	1.36136e+20
Dysosma_pleianthaA|scaffold21576	Dysosma_versipellisA|scaffold31080	8	4.02862e-05	8.20646e-05		10	1.28136e+29
Dysosma_pleianthaA|scaffold22298	Dysosma_versipellisA|C749268	8	7.53393e-05	0.000147513		5	136136141143144
Dysosma_pleianthaA|scaffold24395	Dysosma_versipellisA|C744187	13	7.47406e-06	1.74925e-05		9	6.0761e+26
Dysosma_pleianthaA|scaffold24553	Dysosma_versipellisA|C747053	8	0.00299092	0.00522225		4	141143144150
Dysosma_pleianthaA|scaffold26512	Dysosma_versipellisA|C750024	6	0.00663317	0.010134		3	141143144
Dysosma_pleianthaA|scaffold26530	Dysosma_versipellisA|scaffold18617	9	0.00932202	0.013857		3	141143144
Dysosma_pleianthaA|scaffold26779	Dysosma_versipellisA|C746421	3	0.00535158	0.00877682		3	141143144
Dysosma_pleianthaA|scaffold27479	Dysosma_versipellisA|scaffold16473	9	7.64386e-05	0.000147513		5	637644646653655
Dysosma_pleianthaA|scaffold27588	Dysosma_versipellisA|scaffold29650	5	4.78552e-05	9.57104e-05		4	141142143144
Dysosma_pleianthaA|scaffold28823	Dysosma_versipellisA|scaffold31404	14	0.0204829	0.0285205		5	1.25513e+19
Dysosma_pleianthaA|scaffold29354	Dysosma_versipellisA|scaffold30434	8	0.000909679	0.0016404		4	130137143144
Dysosma_pleianthaA|scaffold29504	Dysosma_versipellisA|scaffold16841	20	0.244572	0.258682		12	13,14,15,18,20,21,23,25,26,28,29,30
Dysosma_pleianthaA|scaffold29545	Dysosma_versipellisA|scaffold3528	15	1.03543e-05	2.32444e-05		5	30,35,37,39,41
Dysosma_pleianthaA|scaffold29834	Dysosma_versipellisA|scaffold29847	8	0.000338698	0.000620947		5	30,35,37,39,41
Dysosma_pleianthaA|scaffold29929	Dysosma_versipellisA|scaffold24164	8	1.86236e-05	4.01686e-05		5	30,35,37,39,41
Dysosma_pleianthaA|scaffold30108	Dysosma_versipellisA|C728167	7	0.0810567	0.09192		5	34,35,37,39,41
Dysosma_pleianthaA|scaffold30364	Dysosma_versipellisA|scaffold25171	10	2.76985e-05	5.74874e-05		5	30,35,37,39,41
Dysosma_pleianthaA|C215942	Dysosma_versipellisA|C266426	1	0.180769	0.194947		4	35,37,39,41
Dysosma_pleianthaA|C274099	Dysosma_versipellisA|C259606	16	0.0239919	0.0325816		11	29,32,35,37,39,41,44,45,46,50,53
Dysosma_pleianthaA|C346825	Dysosma_versipellisA|C370747	0	0.00550546	0.00877682		16	8,11,14,20,23,29,32,35,37,39,41,44,45,46,50,53
Dysosma_pleianthaA|C346825	Dysosma_versipellisA|C370747	0	0.00550546	0.00877682		16	8,11,14,20,23,29,32,35,37,39,41,44,45,46,50,53
Dysosma_pleianthaA|C346825	Dysosma_versipellisA|C370747	0	0.00550546	0.00877682		16	8,11,14,20,23,29,32,35,37,39,41,44,45,46,50,53
Dysosma_pleianthaA|C346825	Dysosma_versipellisA|C370747	0	0.00550546	0.00877682		16	8,11,14,20,23,29,32,35,37,39,41,44,45,46,50,53
Dysosma_pleianthaA|C383129	Dysosma_versipellisA|C724497	11	0.0244301	0.0327721		13	34,35,37,39,41,53,53,54,57,68,69,70,71
Dysosma_pleianthaA|C495782	Dysosma_versipellisA|C642228	7	0.054645	0.0653364		4	35,37,39,41
Dysosma_pleianthaA|C504884	Dysosma_versipellisA|scaffold11323	15	0.00650582	0.0100794		6	32,35,35,37,39,41
Dysosma_pleianthaA|C504988	Dysosma_versipellisA|scaffold14819	1	0.20374	0.217586		6	35,35,37,39,41,41
Dysosma_pleianthaA|C564185	Dysosma_versipellisA|C592038	10	0.0214706	0.0295221		5	35,37,39,41,46
Dysosma_pleianthaA|C565794	Dysosma_versipellisA|C401946	0	0.287289	0.30097		4	35,37,39,41
Dysosma_pleianthaA|C600328	Dysosma_versipellisA|C718256	10	0.0154112	0.022016		6	1.51152e+17
Dysosma_pleianthaA|C600448	Dysosma_versipellisA|scaffold12852	14	0.568461	0.581511		4	18,19,20,21
Dysosma_pleianthaA|C603134	Dysosma_versipellisA|C671210	37	0.032364	0.0418828		4	83,84,85,86
Dysosma_pleianthaA|C603244	Dysosma_versipellisA|scaffold18068	10	0.127821	0.140603		4	83,84,85,86
Dysosma_pleianthaA|C603272	Dysosma_versipellisA|C596112	1	0.159388	0.173591		4	83,84,85,86
Dysosma_pleianthaA|C604122	Dysosma_versipellisA|C530017	0	0.0450191	0.0544188		4	83,84,85,86
Dysosma_pleianthaA|C604484	Dysosma_versipellisA|C646702	7	0.00289002	0.00512745		18	62,65,71,73,75,77,83,84,85,86,93,94,97,102,110,114,114,116
Dysosma_pleianthaA|C627851	Dysosma_versipellisA|C588394	57	9.41305e-06	2.15716e-05		27	1.16117e+80
Dysosma_pleianthaA|C633300	Dysosma_versipellisA|C658678	68	4.06854e-06	1.01418e-05		25	51,52,53,57,58,59,60,61,62,63,65,66,67,68,69,70,73,74,75,77,78,79,80,81,83
Dysosma_pleianthaA|C637411	Dysosma_versipellisA|C589679	51	0.0577596	0.0683178		14	1.82183e+41
Dysosma_pleianthaA|C655410	Dysosma_versipellisA|C592150	11	0.0407434	0.0503571		6	1.54155e+17
Dysosma_pleianthaA|C658136	Dysosma_versipellisA|C677190	24	1.93131e-06	5.18156e-06		44	1.23125e+131
Dysosma_pleianthaA|C659962	Dysosma_versipellisA|scaffold6261	8	3.56546e-08	1.03211e-07		44	1.23125e+131
Dysosma_pleianthaA|C682409	Dysosma_versipellisA|C737763	4	1.29366e-06	3.55757e-06		42	1.23125e+125
Dysosma_pleianthaA|C695769	Dysosma_versipellisA|C748640	8	1.57907e-08	4.96278e-08		41	1.22123e+122
Dysosma_pleianthaA|C697443	Dysosma_versipellisA|C743639	7	1.3654e-11	5.77668e-11		40	1.23125e+119
Dysosma_pleianthaA|C698969	Dysosma_versipellisA|C678197	63	0.00864236	0.0130227		5	236236238239239
Dysosma_pleianthaA|C700422	Dysosma_versipellisA|scaffold21654	8	6.29548e-10	2.30834e-09		60	65,66,66,67,68,74,98,101,110,113,116,117,122,123,125,131,134,135,140,149,161,164,167,168,170,176,179,188,191,194,197,206,209,210,218,221,221,224,233,236,236,238,239,239,242,245,248,251,254,257,263,266,268,269,279,281,284,299,300,301
Dysosma_pleianthaA|C704188	Dysosma_versipellisA|scaffold7374	2	0.0294081	0.0385107		5	236236238239239
Dysosma_pleianthaA|C704716	Dysosma_versipellisA|C370221	30	0.757479	0.757479		2	236236
Dysosma_pleianthaA|C707532	Dysosma_versipellisA|scaffold28335	9	3.86249e-12	2.02321e-11		22	17,19,20,21,22,23,24,25,26,29,30,30,32,35,37,38,39,41,42,43,44,47
Dysosma_pleianthaA|C707954	Dysosma_versipellisA|C752570	6	1.33008e-05	2.92617e-05		20	17,19,20,21,22,23,24,25,26,29,30,32,35,37,38,39,41,42,43,44
Dysosma_pleianthaA|C709528	Dysosma_versipellisA|C647348	37	0.661387	0.667454		3	238239239
Dysosma_pleianthaA|C711036	Dysosma_versipellisA|C724583	6	1.90728e-13	1.49858e-12		32	9,10,11,12,13,15,19,20,21,22,23,24,24,26,28,29,33,38,40,43,44,45,47,48,50,51,52,54,56,57,58,59
Dysosma_pleianthaA|C711116	Dysosma_versipellisA|scaffold29034	6	6.28536e-11	2.46925e-10		33	9,10,11,12,13,15,19,20,21,22,23,24,26,28,29,33,38,40,43,44,45,47,48,50,51,52,53,54,54,56,57,58,59
Dysosma_pleianthaA|C711592	Dysosma_versipellisA|scaffold25753	14	1.13101e-09	4.01326e-09		23	21,22,23,24,26,28,29,33,38,40,43,44,45,47,48,50,51,52,54,56,57,58,59
Dysosma_pleianthaA|C713062	Dysosma_versipellisA|scaffold25789	9	2.75645e-08	8.19486e-08		27	21,22,23,24,25,26,28,29,33,33,38,40,43,44,45,47,48,50,51,52,54,56,57,58,59,60,61
Dysosma_pleianthaA|C713784	Dysosma_versipellisA|C750458	7	2.31506e-12	1.27328e-11		23	21,22,23,24,26,28,29,33,38,40,43,44,45,47,48,50,51,52,54,56,57,58,59
Dysosma_pleianthaA|C715038	Dysosma_versipellisA|C752532	6	1.66783e-12	1.01923e-11		23	21,22,23,24,26,28,29,33,38,40,43,44,45,47,48,50,51,52,54,56,57,58,59
Dysosma_pleianthaA|C715140	Dysosma_versipellisA|C759838	7	3.25633e-06	8.5285e-06		23	21,22,23,24,26,28,29,33,38,40,43,44,45,47,48,50,51,52,54,56,57,58,59
Dysosma_pleianthaA|C715534	Dysosma_versipellisA|C720066	8	2.9961e-09	1.02991e-08		23	21,22,23,24,26,28,29,33,38,40,43,44,45,47,48,50,51,52,54,56,57,58,59
Dysosma_pleianthaA|C716420	Dysosma_versipellisA|C726347	12	3.54626e-06	9.07182e-06		24	21,22,23,24,26,28,29,30,33,38,40,43,44,45,47,48,50,51,52,54,56,57,58,59
Dysosma_pleianthaA|C716834	Dysosma_versipellisA|scaffold254	7	5.03834e-12	2.51917e-11		24	21,22,23,24,26,28,29,33,37,38,40,43,44,45,47,48,50,51,52,54,56,57,58,59
Dysosma_pleianthaA|C717176	Dysosma_versipellisA|C744365	8	7.85484e-12	3.45613e-11		23	21,22,23,24,26,28,29,33,38,40,43,44,45,47,48,50,51,52,54,56,57,58,59
Dysosma_pleianthaA|C718716	Dysosma_versipellisA|scaffold8394	6	9.88003e-09	3.26841e-08		24	21,22,23,24,26,28,29,33,38,40,43,44,45,47,48,50,51,52,54,56,57,58,58,59
Dysosma_pleianthaA|C719360	Dysosma_versipellisA|C759958	9	1.43397e-15	3.15474e-14		24	21,22,23,24,26,28,29,33,38,40,43,44,45,47,48,50,51,52,54,56,57,58,59,61
Dysosma_pleianthaA|C720684	Dysosma_versipellisA|C738393	9	1.66985e-10	6.33391e-10		23	21,22,23,24,26,28,29,33,38,40,43,44,45,47,48,50,51,52,54,56,57,58,59
Dysosma_pleianthaA|C720780	Dysosma_versipellisA|scaffold26000	8	6.01698e-14	7.35408e-13		23	21,22,23,24,26,28,29,33,38,40,43,44,45,47,48,50,51,52,54,56,57,58,59
Dysosma_pleianthaA|C721986	Dysosma_versipellisA|scaffold28429	6	1.08874e-13	1.08874e-12		24	21,22,23,24,26,28,29,33,38,40,43,44,45,47,48,50,51,52,54,56,57,58,59,60
Dysosma_pleianthaA|C722066	Dysosma_versipellisA|C751850	8	5.52745e-15	8.68599e-14		24	21,21,22,23,24,26,28,29,33,38,40,43,44,45,47,48,50,51,52,54,56,57,58,59
Dysosma_pleianthaA|C722222	Dysosma_versipellisA|scaffold27648	8	6.73372e-14	7.4071e-13		23	21,22,23,24,26,28,29,33,38,40,43,44,45,47,48,50,51,52,54,56,57,58,59
Dysosma_pleianthaA|C722454	Dysosma_versipellisA|C765308	7	4.82614e-16	2.65438e-14		23	21,22,23,24,26,28,29,33,38,40,43,44,45,47,48,50,51,52,54,56,57,58,59
Dysosma_pleianthaA|C722488	Dysosma_versipellisA|scaffold29244	8	5.44928e-12	2.60618e-11		24	21,22,23,24,26,28,29,33,38,40,41,43,44,45,47,48,50,51,52,54,56,57,58,59
Dysosma_pleianthaA|C723106	Dysosma_versipellisA|scaffold27673	7	9.96616e-13	6.44869e-12		23	21,22,23,24,26,28,29,33,38,40,43,44,45,47,48,50,51,52,54,56,57,58,59
Dysosma_pleianthaA|C723158	Dysosma_versipellisA|scaffold3160	13	4.14891e-06	1.01418e-05		23	21,22,23,24,26,28,29,33,38,40,43,44,45,47,48,50,51,52,54,56,57,58,59
Dysosma_pleianthaA|C723576	Dysosma_versipellisA|C754364	11	5.76778e-13	3.96535e-12		24	21,22,23,24,26,27,28,29,33,38,40,43,44,45,47,48,50,51,52,54,56,57,58,59
Dysosma_pleianthaA|C723896	Dysosma_versipellisA|scaffold12623	9	2.20672e-15	4.04565e-14		24	21,22,23,24,26,28,29,33,38,40,43,44,45,47,47,48,50,51,52,54,56,57,58,59
Dysosma_pleianthaA|C723914	Dysosma_versipellisA|scaffold22342	13	1.78019e-12	1.03064e-11		23	21,22,23,24,26,28,29,33,38,40,43,44,45,47,48,50,51,52,54,56,57,58,59
Dysosma_pleianthaA|C723948	Dysosma_versipellisA|scaffold2530	8	1.35113e-16	1.48624e-14		23	21,22,23,24,26,28,29,33,38,40,43,44,45,47,48,50,51,52,54,56,57,58,59
Dysosma_pleianthaA|C725738	Dysosma_versipellisA|scaffold31149	7	6.39937e-15	8.79914e-14		23	21,22,23,24,26,28,29,33,38,40,43,44,45,47,48,50,51,52,54,56,57,58,59
Dysosma_pleianthaA|C726374	Dysosma_versipellisA|scaffold31152	13	1.00648e-15	2.9003e-14		23	21,22,23,24,26,28,29,33,38,40,43,44,45,47,48,50,51,52,54,56,57,58,59
Dysosma_pleianthaA|C727830	Dysosma_versipellisA|scaffold25466	6	1.88566e-13	1.49858e-12		25	21,22,23,24,26,26,28,29,33,38,40,43,44,45,45,47,48,50,51,52,54,56,57,58,59
Dysosma_pleianthaA|C728286	Dysosma_versipellisA|C760560	7	1.05465e-15	2.9003e-14		23	21,22,23,24,26,28,29,33,38,40,43,44,45,47,48,50,51,52,54,56,57,58,59
Dysosma_pleianthaA|C728978	Dysosma_versipellisA|scaffold30188	33	1.24744e-13	1.14348e-12		33	2.06209e+98
Dysosma_pleianthaA|C729164	Dysosma_versipellisA|C762520	8	3.84052e-13	2.81638e-12		32	2.06209e+95
Dysosma_pleianthaA|C729310	Dysosma_versipellisA|C756224	8	2.65805e-08	8.12183e-08		27	2.06209e+80
Dysosma_pleianthaA|C730810	Dysosma_versipellisA|C763406	9	4.81152e-11	1.96025e-10		31	2.06209e+92
Dysosma_pleianthaA|C731320	Dysosma_versipellisA|C764912	7	6.71178e-12	3.07623e-11		31	2.06209e+92
Gene1	Gene2	NumDiffs	Pvalue	FDRCorrectedPValue	NumRes_ClusterwHighP	ClusterLen_FracTotalLength	Coords
Gelsemium_elegansA|scaffold82	Gelsemium_sempervirens|C228104	8	0.272165	0.28067		4	162184205235
Gelsemium_elegansA|scaffold719	Gelsemium_sempervirens|scaffold4243	19	0.00776781	0.0125043		3	361362363
Gelsemium_elegansA|scaffold1928	Gelsemium_sempervirens|C158147	10	0.0271513	0.0358397		3	361362363
Gelsemium_elegansA|scaffold3528	Gelsemium_sempervirens|scaffold1320	7	0.00593293	0.0100403		3	361362363
Gelsemium_elegansA|scaffold3713	Gelsemium_sempervirens|C232546	13	0.0109386	0.0160433		3	361362363
Gelsemium_elegansA|scaffold3980	Gelsemium_sempervirens|scaffold12119	7	0.00312188	0.00624377		11	2.90298e+32
Gelsemium_elegansA|scaffold5035	Gelsemium_sempervirens|C175080	6	0.0407115	0.0506973		3	361362363
Gelsemium_elegansA|scaffold5892	Gelsemium_sempervirens|scaffold13047	23	0.046092	0.0563347		6	10,28,33,42,64,71
Gelsemium_elegansA|scaffold7560	Gelsemium_sempervirens|scaffold15182	10	0.188679	0.204144		2	322324
Gelsemium_elegansA|scaffold8105	Gelsemium_sempervirens|scaffold10373	12	0.191814	0.204189		2	47,49
Gelsemium_elegansA|scaffold11516	Gelsemium_sempervirens|C177342	32	0.000439245	0.00120792		16	83,87,88,91,92,93,96,97,103,105,110,111,112,113,117,120
Gelsemium_elegansA|scaffold11675	Gelsemium_sempervirens|C243743	7	6.05525e-05	0.000249779		17	83,87,88,91,92,93,96,97,103,105,107,110,111,112,113,117,120
Gelsemium_elegansA|scaffold11834	Gelsemium_sempervirens|C241895	14	4.73652e-06	4.46587e-05		14	91,92,93,96,97,103,105,108,110,111,112,113,117,120
Gelsemium_elegansA|scaffold11990	Gelsemium_sempervirens|C251566	13	3.08322e-09	1.01746e-07		14	91,92,93,96,96,97,103,105,110,111,112,113,117,120
Gelsemium_elegansA|scaffold12813	Gelsemium_sempervirens|scaffold1705	14	4.53657e-10	2.99413e-08		19	91,92,93,96,97,99,103,105,110,111,112,113,117,120,120,121,129,130,135
Gelsemium_elegansA|scaffold13313	Gelsemium_sempervirens|scaffold6648	14	1.98144e-08	3.26937e-07		18	91,92,93,96,97,103,105,110,111,112,113,117,120,124,129,130,130,135
Gelsemium_elegansA|scaffold13435	Gelsemium_sempervirens|scaffold11033	18	2.11598e-07	2.7931e-06		15	9.71031e+43
Gelsemium_elegansA|C42100	Gelsemium_sempervirens|C193413	9	0.064442	0.074617		10	95,96,97,98,103,105,110,111,112,113
Gelsemium_elegansA|C83363	Gelsemium_sempervirens|scaffold13829	16	0.00292032	0.00621745		9	1.03104e+26
Gelsemium_elegansA|C105845	Gelsemium_sempervirens|scaffold15189	2	0.971434	0.971434		2	110110
Gelsemium_elegansA|C122139	Gelsemium_sempervirens|C196111	20	0.0299179	0.0387173		15	1.05107e+44
Gelsemium_elegansA|C123761	Gelsemium_sempervirens|C153964	34	0.0165061	0.0226959		5	12,13,14,15,17
Gelsemium_elegansA|C135816	Gelsemium_sempervirens|C185184	27	0.211225	0.221284		3	2,4,5
Gelsemium_elegansA|C135874	Gelsemium_sempervirens|C154166	6	0.131751	0.144926		3	98,98,99
Gelsemium_elegansA|C136168	Gelsemium_sempervirens|scaffold13498	9	0.037312	0.0473576		10	72,73,74,77,81,83,86,92,95,98
Gelsemium_elegansA|C148892	Gelsemium_sempervirens|scaffold4224	22	3.6959e-06	4.06549e-05		15	1.8018e+44
Gelsemium_elegansA|C150440	Gelsemium_sempervirens|scaffold7096	8	0.00859108	0.0135003		12	1.80182e+35
Gelsemium_elegansA|C154038	Gelsemium_sempervirens|C250709	10	0.000895942	0.00227431		5	204204206207207
Gelsemium_elegansA|C154880	Gelsemium_sempervirens|scaffold5034	9	0.0610398	0.0719398		4	204204206207
Gelsemium_elegansA|C159970	Gelsemium_sempervirens|scaffold7148	35	0.0114075	0.0163672		5	6,8,9,10,13
Gelsemium_elegansA|C160010	Gelsemium_sempervirens|C220685	3	0.0917942	0.102685		6	2.70274e+17
Gelsemium_elegansA|C160378	Gelsemium_sempervirens|C175434	8	0.0108926	0.0160433		14	1.12113e+41
Gelsemium_elegansA|C161288	Gelsemium_sempervirens|C241619	11	0.00735094	0.0121291		10	2.58262e+29
Gelsemium_elegansA|C163395	Gelsemium_sempervirens|C172890	6	0.0603442	0.0719398		3	156156157
Gelsemium_elegansA|C164629	Gelsemium_sempervirens|C243221	16	0.000845131	0.00223114		11	1.26127e+32
Gelsemium_elegansA|C166238	Gelsemium_sempervirens|C220425	10	0.000996059	0.00243481		11	2.50252e+32
Gelsemium_elegansA|C167430	Gelsemium_sempervirens|scaffold16029	12	0.00177435	0.00390356		7	2.70274e+20
Gelsemium_elegansA|C168332	Gelsemium_sempervirens|C238253	29	0.00159798	0.00363677		7	2.74275e+20
Gelsemium_elegansA|C183109	Gelsemium_sempervirens|C222363	19	0.0146411	0.0205599		7	2.74275e+20
Gelsemium_elegansA|C186161	Gelsemium_sempervirens|scaffold16394	16	0.67676	0.687172		3	274275275
Gelsemium_elegansA|C187299	Gelsemium_sempervirens|C234649	19	0.000276927	0.000865725		17	2.33237e+50
Gelsemium_elegansA|C188771	Gelsemium_sempervirens|C156223	9	0.00529257	0.00919235		7	2.74275e+20
Gelsemium_elegansA|C189617	Gelsemium_sempervirens|C244169	18	0.0089283	0.0137039		7	2.74275e+20
Gelsemium_elegansA|C189623	Gelsemium_sempervirens|C180540	14	0.069152	0.0786902		7	2.74275e+20
Gelsemium_elegansA|C189659	Gelsemium_sempervirens|scaffold12534	12	2.87233e-05	0.000156007		16	2.33234e+47
Gelsemium_elegansA|C190162	Gelsemium_sempervirens|C195481	2	0.00390176	0.0073576		8	2.73274e+23
Gelsemium_elegansA|C192382	Gelsemium_sempervirens|C245305	8	0.000102727	0.000356842		8	2.73274e+23
Gelsemium_elegansA|C193922	Gelsemium_sempervirens|C239489	6	0.00135548	0.00319505		8	2.73274e+23
Gelsemium_elegansA|C194912	Gelsemium_sempervirens|scaffold8436	13	0.000433547	0.00120792		19	2.20222e+56
Gelsemium_elegansA|C195032	Gelsemium_sempervirens|scaffold13036	18	7.76285e-05	0.000301381		8	2.74275e+23
Gelsemium_elegansA|C195500	Gelsemium_sempervirens|scaffold6460	13	0.00308009	0.00624377		7	2.74275e+20
Gelsemium_elegansA|C195778	Gelsemium_sempervirens|scaffold13954	11	5.60335e-06	4.62277e-05		17	2.32233e+50
Gelsemium_elegansA|C197296	Gelsemium_sempervirens|C231170	8	2.6825e-05	0.000156007		8	2.74275e+23
Gelsemium_elegansA|C198078	Gelsemium_sempervirens|scaffold14217	14	1.35883e-05	9.96475e-05		15	2.33239e+44
Gelsemium_elegansA|C199080	Gelsemium_sempervirens|C243417	16	9.65748e-05	0.000354108		19	2.33234e+56
Gelsemium_elegansA|C199166	Gelsemium_sempervirens|C247655	8	0.000241553	0.000797126		19	2.33234e+56
Gelsemium_elegansA|C199636	Gelsemium_sempervirens|scaffold13255	6	0.00426803	0.00782472		8	2.74275e+23
Gelsemium_elegansA|C200108	Gelsemium_sempervirens|scaffold11065	14	1.92213e-08	3.26937e-07		18	2.33239e+53
Gelsemium_elegansA|C201851	Gelsemium_sempervirens|C241423	25	4.16498e-05	0.000196349		7	2.74275e+20
Gelsemium_elegansA|C201925	Gelsemium_sempervirens|scaffold12552	12	0.000288575	0.000865725		7	2.74275e+20
Gelsemium_elegansA|C205147	Gelsemium_sempervirens|C237357	13	5.43955e-05	0.00023934		8	2.74275e+23
Gelsemium_elegansA|C206341	Gelsemium_sempervirens|scaffold13851	6	3.07287e-05	0.000156007		8	2.74275e+23
Gelsemium_elegansA|C207335	Gelsemium_sempervirens|C246871	16	2.54262e-05	0.000156007		7	2.74275e+20
Gelsemium_elegansA|C212840	Gelsemium_sempervirens|scaffold10091	30	0.00525259	0.00919235		5	275279281282283
Gelsemium_elegansA|C214032	Gelsemium_sempervirens|C190550	6	0.0230768	0.031083		7	1.75177e+20
Gelsemium_elegansA|C217992	Gelsemium_sempervirens|scaffold7549	28	0.00364322	0.00707213		5	785786792799800
Gene1	Gene2	NumDiffs	Pvalue	FDRCorrectedPValue	NumRes_ClusterwHighP	ClusterLen_FracTotalLength	Coords
Hamamelis_japonica|scaffold73	Hamamelis_vernalis|scaffold14363	56	0.00100816	0.00310623		6	6.85687e+17
Hamamelis_japonica|scaffold432	Hamamelis_vernalis|scaffold14713	9	0.00217166	0.00589451		5	685686688689690
Hamamelis_japonica|scaffold1166	Hamamelis_vernalis|C221745	12	0.0648085	0.101208		5	685686688689690
Hamamelis_japonica|scaffold1526	Hamamelis_vernalis|C180404	17	0.109747	0.152575		5	685686688689690
Hamamelis_japonica|scaffold2905	Hamamelis_vernalis|C233009	9	0.0728077	0.109982		5	685686688689690
Hamamelis_japonica|scaffold3328	Hamamelis_vernalis|scaffold4188	19	0.0113495	0.0256531		5	685686688689690
Hamamelis_japonica|scaffold3542	Hamamelis_vernalis|C306471	14	0.0213436	0.0392447		5	685686688689690
Hamamelis_japonica|scaffold3763	Hamamelis_vernalis|C314064	13	0.00327471	0.00848447		5	685686688689690
Hamamelis_japonica|scaffold4758	Hamamelis_vernalis|scaffold14245	17	0.0179313	0.0346469		5	685686688689690
Hamamelis_japonica|scaffold5153	Hamamelis_vernalis|C216291	23	0.0598164	0.0947093		7	1.3814e+20
Hamamelis_japonica|scaffold5153	Hamamelis_vernalis|C216291	23	0.0598164	0.0947093		7	1.3814e+20
Hamamelis_japonica|scaffold6159	Hamamelis_vernalis|C291655	24	0.10081	0.141881		5	685686688689690
Hamamelis_japonica|scaffold6709	Hamamelis_vernalis|C289709	80	0.000546399	0.00173026		25	4.86487e+74
Hamamelis_japonica|scaffold6894	Hamamelis_vernalis|scaffold6698	29	0.00304153	0.00806359		7	4.86487e+20
Hamamelis_japonica|scaffold8289	Hamamelis_vernalis|scaffold222	7	0.0339175	0.0577103		7	4.86487e+20
Hamamelis_japonica|scaffold8312	Hamamelis_vernalis|scaffold11213	35	0.0163398	0.0326796		7	4.86487e+20
Hamamelis_japonica|scaffold10163	Hamamelis_vernalis|scaffold9917	3	0.244086	0.285202		7	4.86487e+20
Hamamelis_japonica|scaffold10240	Hamamelis_vernalis|scaffold17752	23	0.00814447	0.0193431		7	4.86487e+20
Hamamelis_japonica|scaffold10595	Hamamelis_vernalis|C301613	8	0.0118828	0.0260508		7	4.86487e+20
Hamamelis_japonica|scaffold10613	Hamamelis_vernalis|C264735	40	0.0248771	0.0450156		7	4.86487e+20
Hamamelis_japonica|scaffold10838	Hamamelis_vernalis|C309182	106	3.78303e-06	1.9603e-05		71	558,564,567,568,569,574,575,576,577,583,585,586,588,589,592,595,598,599,610,627,641,666,676,677,679,691,702,711,714,720,722,729,736,742,744,755,756,757,762,773,778,783,787,793,796,802,804,807,810,811,813,816,822,823,831,840,842,843,844,853,858,867,875,876,879,880,888,889,891,892,893
Hamamelis_japonica|scaffold10962	Hamamelis_vernalis|scaffold332	22	0.0114764	0.0256531		17	5.64568e+50
Hamamelis_japonica|scaffold11287	Hamamelis_vernalis|C290455	9	0.238175	0.282833		4	574575576577
Hamamelis_japonica|scaffold11686	Hamamelis_vernalis|C282685	61	0.0152661	0.0319273		8	1.6917e+23
Hamamelis_japonica|scaffold12148	Hamamelis_vernalis|C292803	16	0.0172092	0.033825		8	1.70171e+23
Hamamelis_japonica|scaffold12764	Hamamelis_vernalis|scaffold6521	18	0.092592	0.133614		5	888889891892893
Hamamelis_japonica|scaffold12850	Hamamelis_vernalis|scaffold9619	41	0.000180659	0.000686503		9	4.99502e+26
Hamamelis_japonica|scaffold13082	Hamamelis_vernalis|scaffold16025	9	0.007966	0.0193218		8	5.01503e+23
Hamamelis_japonica|scaffold13784	Hamamelis_vernalis|C301215	92	0.000367437	0.00126933		10	30,31,32,33,35,37,39,43,44,45
Hamamelis_japonica|scaffold13847	Hamamelis_vernalis|C297247	8	0.298956	0.330883		4	582583584585
Hamamelis_japonica|scaffold15400	Hamamelis_vernalis|scaffold12017	47	0.000220386	0.000810451		60	4.21423e+179
Hamamelis_japonica|scaffold15943	Hamamelis_vernalis|C264679	7	0.0989103	0.140947		5	888889891892893
Hamamelis_japonica|scaffold16583	Hamamelis_vernalis|C308268	9	0.0156426	0.0319273		10	6.85689e+29
Hamamelis_japonica|scaffold17180	Hamamelis_vernalis|C319940	17	0.0068644	0.0170118		65	421,423,424,425,439,440,441,442,452,453,460,460,470,474,477,483,486,487,488,492,498,505,516,531,537,542,543,545,549,551,556,578,582,583,584,585,594,595,597,604,615,616,617,618,625,630,640,645,654,658,659,661,666,672,675,685,688,690,693,697,698,699,702,703,705
Hamamelis_japonica|scaffold17264	Hamamelis_vernalis|scaffold14956	27	3.12894e-07	2.85669e-06		70	441,442,442,444,448,452,452,453,460,460,470,474,476,477,483,486,487,488,492,505,516,533,542,543,545,549,551,556,578,578,582,583,584,585,594,595,597,606,615,616,617,618,625,630,640,645,654,658,659,661,666,672,675,685,688,690,691,693,697,698,699,702,703,705,725,730,731,735,736,739
Hamamelis_japonica|scaffold17394	Hamamelis_vernalis|scaffold19132	20	2.06791e-06	1.12258e-05		70	452,452,453,459,460,460,470,474,476,477,483,486,487,488,492,505,510,515,516,517,533,534,542,543,545,549,551,555,556,561,564,569,577,578,578,582,583,584,585,594,595,597,606,615,616,617,618,625,630,633,640,645,654,658,659,661,666,672,675,685,688,690,691,693,697,698,699,702,703,705
Hamamelis_japonica|scaffold17650	Hamamelis_vernalis|C320258	18	0.0260584	0.0464164		7	5.77579e+20
Hamamelis_japonica|scaffold18396	Hamamelis_vernalis|C264731	2	0.477025	0.513026		3	452452453
Hamamelis_vernalis|scaffold14528	Hamamelis_japonica|C340419	16	0.0184992	0.0351485		7	5.77579e+20
Hamamelis_japonica|scaffold18648	Hamamelis_vernalis|C248216	11	0.152188	0.190654		7	5.77579e+20
Hamamelis_japonica|scaffold19299	Hamamelis_vernalis|C307946	10	4.81022e-05	0.000219346		41	5.77579e+122
Hamamelis_japonica|scaffold19321	Hamamelis_vernalis|scaffold17545	14	0.0156836	0.0319273		7	5.77579e+20
Hamamelis_japonica|scaffold19794	Hamamelis_vernalis|scaffold10278	9	0.0276356	0.0484687		7	5.77579e+20
Hamamelis_japonica|scaffold19878	Hamamelis_vernalis|scaffold5309	18	4.1834e-15	2.67087e-13		81	441,442,452,452,453,460,460,470,474,476,477,483,486,487,488,492,501,505,516,533,541,542,543,545,549,551,556,577,578,578,582,583,584,585,594,595,597,603,606,615,616,617,618,622,625,627,630,633,640,645,654,658,659,661,666,672,675,685,688,690,691,693,697,698,699,702,703,705,725,730,731,735,736,739,752,760,764,768,774,782,783
Hamamelis_japonica|scaffold20260	Hamamelis_vernalis|scaffold15632	7	2.03713e-06	1.12258e-05		67	452,452,453,460,460,470,474,476,477,483,486,487,488,492,505,516,524,533,540,541,542,543,545,549,551,556,577,578,578,582,583,584,585,594,595,597,603,606,615,616,617,618,622,625,627,630,633,640,645,654,658,659,661,666,672,675,685,688,690,691,693,697,698,699,702,703,705
Hamamelis_japonica|C113562	Hamamelis_vernalis|scaffold17000	7	0.501313	0.524308		3	452452453
Hamamelis_japonica|C121546	Hamamelis_vernalis|C93281	6	0.569061	0.584441		3	452452453
Hamamelis_japonica|C242059	Hamamelis_vernalis|C292881	9	0.247676	0.285202		3	452452453
Hamamelis_japonica|C243841	Hamamelis_vernalis|C158427	7	0.454227	0.493161		3	452452453
Hamamelis_japonica|C274422	Hamamelis_vernalis|C290683	10	0.290232	0.324377		3	452452453
Hamamelis_japonica|C275714	Hamamelis_vernalis|C257395	18	0.267745	0.305229		3	452452453
Hamamelis_japonica|C276807	Hamamelis_vernalis|C273956	11	0.189094	0.229326		7	5.77579e+20
Hamamelis_japonica|C278099	Hamamelis_vernalis|C244968	17	0.136694	0.179116		7	5.77579e+20
Hamamelis_japonica|C281625	Hamamelis_vernalis|C322864	6	0.146823	0.188066		7	5.77579e+20
Hamamelis_japonica|C284338	Hamamelis_vernalis|C295435	8	0.141661	0.183515		7	5.77579e+20
Hamamelis_japonica|C284340	Hamamelis_vernalis|C207039	2	0.488977	0.516142		3	452452453
Hamamelis_japonica|C288496	Hamamelis_vernalis|scaffold19240	7	0.131914	0.177651		7	5.77579e+20
Hamamelis_japonica|C290513	Hamamelis_vernalis|C254684	8	0.157764	0.19549		7	5.77579e+20
Hamamelis_japonica|C290515	Hamamelis_vernalis|C98865	1	0.488977	0.516142		3	452452453
Hamamelis_japonica|C298077	Hamamelis_vernalis|C283345	7	0.136694	0.179116		7	5.77579e+20
Hamamelis_japonica|C298275	Hamamelis_vernalis|C297313	11	0.0663521	0.102218		7	5.77579e+20
Hamamelis_japonica|C301541	Hamamelis_vernalis|C251862	10	0.0733216	0.109982		7	5.77579e+20
Hamamelis_japonica|C307836	Hamamelis_vernalis|scaffold11754	38	0.209014	0.250816		4	171172173174
Hamamelis_japonica|C313844	Hamamelis_vernalis|C280732	43	0.187055	0.229294		11	88,89,90,91,92,95,96,98,99,100,101
Hamamelis_japonica|C313918	Hamamelis_vernalis|C304585	8	0.0122491	0.0263471		11	88,89,90,91,92,95,96,98,99,100,101
Hamamelis_japonica|C317036	Hamamelis_vernalis|C287487	11	0.0309652	0.0534853		12	88,89,90,91,92,93,95,96,98,99,100,101
Hamamelis_japonica|C322782	Hamamelis_vernalis|scaffold10380	6	0.00153877	0.00438548		22	88,89,90,91,92,95,96,98,99,99,100,101,110,110,111,112,112,113,117,120,121,122
Hamamelis_japonica|C324653	Hamamelis_vernalis|scaffold12542	9	0.247525	0.285202		5	98,98,99,100,101
Hamamelis_japonica|C325173	Hamamelis_vernalis|C311782	8	0.0104197	0.0242419		11	88,89,90,91,92,95,96,98,99,100,101
Hamamelis_japonica|C325461	Hamamelis_vernalis|scaffold11620	11	0.00473566	0.011997		14	87,88,89,90,91,92,95,96,98,98,99,100,101,102
Hamamelis_japonica|C333163	Hamamelis_vernalis|C57129	2	0.716886	0.729687		2	98,98
Hamamelis_japonica|C333597	Hamamelis_vernalis|scaffold2806	31	0.0813588	0.120453		5	888889891892893
Hamamelis_japonica|C335945	Hamamelis_vernalis|C236579	12	0.152118	0.190654		6	2.85286e+17
Hamamelis_japonica|C336009	Hamamelis_vernalis|C298921	6	0.3133	0.343425		4	193194196196
Hamamelis_japonica|C338389	Hamamelis_vernalis|C230509	22	0.132459	0.177651		5	262263264265266
Hamamelis_japonica|C339839	Hamamelis_vernalis|C332829	7	0.0592969	0.0947093		5	262263264265266
Hamamelis_japonica|C340117	Hamamelis_vernalis|scaffold18249	19	0.0867554	0.126796		5	888889891892893
Hamamelis_japonica|C343221	Hamamelis_vernalis|C182592	7	0.278664	0.314532		3	154154155
Hamamelis_japonica|C344716	Hamamelis_vernalis|scaffold10771	64	3.99015e-07	3.03251e-06		21	4.00401e+62
Hamamelis_japonica|C345508	Hamamelis_vernalis|scaffold11538	11	5.19153e-06	2.46598e-05		22	4.00401e+65
Hamamelis_japonica|C346370	Hamamelis_vernalis|C301521	7	1.42632e-06	8.55795e-06		22	4.00401e+65
Hamamelis_japonica|C346430	Hamamelis_vernalis|C294133	15	0.127924	0.175703		12	4.15416e+35
Hamamelis_japonica|C350320	Hamamelis_vernalis|C330393	12	1.7368e-08	3.29993e-07		22	4.00401e+65
Hamamelis_japonica|C351172	Hamamelis_vernalis|C313168	8	3.99015e-07	3.03251e-06		21	4.00401e+62
Hamamelis_japonica|C351524	Hamamelis_vernalis|C296061	33	1.47228e-10	4.19601e-09		29	4.77478e+86
Hamamelis_japonica|C352820	Hamamelis_vernalis|scaffold15049	9	5.36483e-08	7.64489e-07		27	4.77478e+80
Hamamelis_japonica|C353364	Hamamelis_vernalis|scaffold13302	7	0.000233227	0.00083087		27	4.77478e+80
Hamamelis_japonica|C353366	Hamamelis_vernalis|C294965	1	0.00110085	0.00330256		27	4.77478e+80
Hamamelis_japonica|C354134	Hamamelis_vernalis|C240728	17	0.000483412	0.00157454		16	4.87488e+47
Hamamelis_japonica|C355420	Hamamelis_vernalis|C250476	10	0.000158001	0.000621106		16	4.87488e+47
Hamamelis_japonica|C355448	Hamamelis_vernalis|scaffold18066	14	1.5628e-07	1.94404e-06		20	4.83485e+59
Hamamelis_japonica|C356002	Hamamelis_vernalis|C319132	15	0.987926	0.987926		2	493493
Hamamelis_japonica|C356636	Hamamelis_vernalis|C314882	8	0.0486242	0.0803356		14	4.90491e+41
Hamamelis_japonica|C358050	Hamamelis_vernalis|C326585	7	4.56412e-06	2.26221e-05		20	4.83485e+59
Hamamelis_japonica|C358828	Hamamelis_vernalis|C302269	5	0.00158554	0.00440858		16	4.87488e+47
Hamamelis_japonica|C358938	Hamamelis_vernalis|C298663	10	0.0190208	0.035547		14	4.90491e+41
Hamamelis_japonica|C360592	Hamamelis_vernalis|C297183	19	7.17587e-05	0.000314634		14	4.90491e+41
Hamamelis_japonica|C362986	Hamamelis_vernalis|C313588	8	2.80673e-09	6.39934e-08		52	3.72375e+155
Hamamelis_japonica|C363920	Hamamelis_vernalis|scaffold13004	31	0.000441584	0.00148061		18	4.03404e+53
Hamamelis_japonica|C365326	Hamamelis_vernalis|C306245	7	3.25763e-07	2.85669e-06		20	4.03404e+59
Hamamelis_japonica|C365961	Hamamelis_vernalis|scaffold2542	3	0.5137	0.53238		7	4.15416e+20
Hamamelis_japonica|C366745	Hamamelis_vernalis|scaffold16700	43	0.00126754	0.00370511		11	4.1942e+32
Hamamelis_japonica|C368384	Hamamelis_vernalis|C310928	24	0.000103353	0.000420793		69	419,420,421,423,424,425,427,428,431,434,436,440,442,444,448,453,454,464,472,477,478,483,485,492,493,493,498,509,523,538,542,552,553,556,559,562,564,565,566,576,579,586,594,595,602,615,616,618,625,630,639,640,658,661,666,672,675,675,685,688,690,691,693,697,698,699,702,703,705
Hamamelis_japonica|C368452	Hamamelis_vernalis|C247744	13	0.0387717	0.0649997		8	4.1942e+23
Hamamelis_japonica|C368490	Hamamelis_vernalis|scaffold11989	48	0.87306	0.880787		6	13,14,15,16,17,18
Hamamelis_japonica|C371408	Hamamelis_vernalis|C292491	6	6.82466e-07	4.86257e-06		41	16,17,18,19,21,22,23,24,26,27,28,30,33,34,35,42,43,44,45,47,49,50,51,52,53,54,55,56,57,58,59,61,62,63,65,66,67,68,69,70,71
Hamamelis_japonica|C373018	Hamamelis_vernalis|scaffold18537	14	4.68574e-15	2.67087e-13		33	26,27,28,33,34,35,42,43,44,45,47,49,50,51,52,53,54,55,56,57,58,59,61,62,63,64,65,66,67,68,69,70,71
Hamamelis_japonica|C375900	Hamamelis_vernalis|C318666	13	1.47367e-13	5.59997e-12		33	26,27,28,33,34,35,42,43,44,45,47,49,49,50,51,52,53,54,55,56,57,58,59,61,62,63,65,66,67,68,69,70,71
Hamamelis_japonica|C377108	Hamamelis_vernalis|C282935	12	7.42339e-07	4.97804e-06		26	42,43,44,45,47,49,50,51,52,53,54,55,56,57,58,59,61,62,63,65,66,67,68,69,70,71
Hamamelis_japonica|C378584	Hamamelis_vernalis|scaffold15522	9	1.1833e-06	7.49423e-06		27	42,43,44,45,47,49,50,51,52,53,54,55,56,57,58,59,61,62,63,65,66,67,68,69,69,70,71
Hamamelis_japonica|C380134	Hamamelis_vernalis|C319044	33	2.61951e-08	4.26606e-07		16	57,58,59,61,62,63,65,66,67,68,69,70,71,77,79,80
Hamamelis_japonica|C380212	Hamamelis_vernalis|C271614	12	8.58486e-05	0.000362472		15	57,58,59,61,62,62,63,65,66,67,68,68,69,70,71
Hamamelis_japonica|C380258	Hamamelis_vernalis|C323048	9	1.7053e-07	1.94404e-06		13	57,58,59,61,62,63,65,66,67,68,69,70,71
Hamamelis_japonica|C381024	Hamamelis_vernalis|scaffold18179	16	2.34831e-07	2.4337e-06		14	55,57,58,59,61,62,63,65,66,67,68,69,70,71
Gene1	Gene2	NumDiffs	Pvalue	FDRCorrectedPValue	NumRes_ClusterwHighP	ClusterLen_FracTotalLength	Coords
Liquidambar_styraciflua|scaffold1276	Liquidarnbar_formosanaA|scaffold29005	12	0.144032	0.166916		4	345352373390
Liquidambar_styraciflua|scaffold1516	Liquidarnbar_formosanaA|scaffold31526	41	0.00409796	0.00696091		7	2.64265e+20
Liquidambar_styraciflua|scaffold3176	Liquidarnbar_formosanaA|scaffold7006	8	0.000230321	0.000468194		12	1.64168e+35
Liquidambar_styraciflua|scaffold3709	Liquidarnbar_formosanaA|scaffold7878	10	8.6308e-05	0.000184521		12	1.64168e+35
Liquidambar_styraciflua|scaffold7613	Liquidarnbar_formosanaA|scaffold294	7	0.00258633	0.00458151		7	1.11112e+20
Liquidambar_styraciflua|scaffold9513	Liquidarnbar_formosanaA|scaffold30426	6	4.17482e-06	1.03536e-05		37	1.06111e+110
Liquidambar_styraciflua|scaffold9513	Liquidarnbar_formosanaA|scaffold30426	6	4.17482e-06	1.03536e-05		37	1.06111e+110
Liquidambar_styraciflua|scaffold10440	Liquidarnbar_formosanaA|C655580	8	2.61321e-06	6.75079e-06		33	1.06111e+98
Liquidambar_styraciflua|scaffold10683	Liquidarnbar_formosanaA|scaffold27205	6	0.000223919	0.000462766		10	1.73175e+29
Liquidambar_styraciflua|scaffold11673	Liquidarnbar_formosanaA|scaffold20607	13	0.000324367	0.000638437		8	2.64265e+23
Liquidambar_styraciflua|scaffold11930	Liquidarnbar_formosanaA|C662058	11	1.73905e-05	4.06129e-05		30	1.17118e+89
Liquidambar_styraciflua|scaffold12954	Liquidarnbar_formosanaA|scaffold8038	7	0.000842329	0.00163201		12	1.68169e+35
Liquidambar_styraciflua|scaffold13373	Liquidarnbar_formosanaA|C528018	23	0.00858921	0.0134818		9	2.5726e+26
Liquidambar_styraciflua|scaffold13687	Liquidarnbar_formosanaA|C620354	6	0.0140822	0.0218275		7	2.64265e+20
Liquidambar_styraciflua|scaffold14476	Liquidarnbar_formosanaA|scaffold11180	9	5.28237e-07	1.5976e-06		17	2.36236e+50
Liquidambar_styraciflua|scaffold14576	Liquidarnbar_formosanaA|C567282	9	0.00104635	0.00196587		14	2.36238e+41
Liquidambar_styraciflua|scaffold15796	Liquidarnbar_formosanaA|C519767	8	0.00179393	0.00322387		10	2.5726e+29
Liquidambar_styraciflua|scaffold16203	Liquidarnbar_formosanaA|scaffold19515	7	1.69128e-08	5.37739e-08		25	1.86187e+74
Liquidambar_styraciflua|scaffold17606	Liquidarnbar_formosanaA|scaffold846	10	0.00133243	0.00242972		8	2.64265e+23
Liquidambar_styraciflua|scaffold19088	Liquidarnbar_formosanaA|C643216	9	6.81974e-07	1.96662e-06		28	1.6917e+83
Liquidambar_styraciflua|scaffold19146	Liquidarnbar_formosanaA|scaffold32504	11	7.78252e-05	0.000169304		15	2.36238e+44
Liquidambar_styraciflua|scaffold19194	Liquidarnbar_formosanaA|C659844	8	2.53431e-06	6.68626e-06		32	1.40141e+95
Liquidambar_styraciflua|scaffold19200	Liquidarnbar_formosanaA|scaffold2793	15	5.85866e-12	2.01798e-11		27	1.7017e+80
Liquidambar_styraciflua|scaffold19628	Liquidarnbar_formosanaA|scaffold31569	13	1.76863e-05	4.06129e-05		15	2.36238e+44
Liquidambar_styraciflua|scaffold19642	Liquidarnbar_formosanaA|scaffold2084	4	0.000111298	0.000233915		16	2.36238e+47
Liquidambar_styraciflua|scaffold19844	Liquidarnbar_formosanaA|scaffold33612	40	1.02556e-05	2.44557e-05		10	1.09111e+29
Liquidambar_styraciflua|scaffold20217	Liquidarnbar_formosanaA|scaffold18731	10	4.07639e-05	9.02629e-05		5	144145146146147
Liquidambar_styraciflua|scaffold21001	Liquidarnbar_formosanaA|C541880	15	0.132134	0.156043		3	266267268
Liquidambar_styraciflua|C69267	Liquidarnbar_formosanaA|C461446	21	0.110116	0.136544		10	54,55,56,57,59,61,62,63,65,66
Liquidambar_styraciflua|C71260	Liquidarnbar_formosanaA|C241183	6	0.0151302	0.0228799		12	54,55,56,57,59,60,61,61,62,63,65,66
Liquidambar_styraciflua|C81575	Liquidarnbar_formosanaA|C566938	13	0.108427	0.135807		5	12,13,14,15,16
Liquidambar_styraciflua|C159698	Liquidarnbar_formosanaA|C297207	1	0.136334	0.159485		4	13,14,15,16
Liquidambar_styraciflua|C224600	Liquidarnbar_formosanaA|C472164	7	0.0432033	0.0615771		7	63,63,64,65,66,68,69
Liquidambar_styraciflua|C224930	Liquidarnbar_formosanaA|C401565	2	0.09444	0.121985		5	101101102104105
Liquidambar_styraciflua|C229822	Liquidarnbar_formosanaA|C364037	4	0.0564239	0.0795064		5	101101102104105
Liquidambar_styraciflua|C265870	Liquidarnbar_formosanaA|C441402	26	0.171749	0.195385		3	63,64,65
Liquidambar_styraciflua|C273068	Liquidarnbar_formosanaA|C562128	12	0.0590542	0.0813636		8	1.22122e+23
Liquidambar_styraciflua|C273068	Liquidarnbar_formosanaA|C562128	12	0.0590542	0.0813636		8	1.22122e+23
Liquidambar_styraciflua|C277708	Liquidarnbar_formosanaA|scaffold11837	4	0.00664958	0.0108493		17	1.22122e+50
Liquidambar_styraciflua|C294745	Liquidarnbar_formosanaA|C619178	13	0.00575466	0.00964295		9	1.22124e+26
Liquidambar_styraciflua|C302739	Liquidarnbar_formosanaA|C453752	20	0.202151	0.227879		5	131135137140143
Liquidambar_styraciflua|C315063	Liquidarnbar_formosanaA|C564436	10	0.0269342	0.03976		6	78,80,81,82,83,85
Liquidambar_styraciflua|C315087	Liquidarnbar_formosanaA|scaffold933	9	0.0940696	0.121985		11	1.31135e+32
Liquidambar_styraciflua|C316859	Liquidarnbar_formosanaA|scaffold1512	15	0.14596	0.167583		7	1.35137e+20
Liquidambar_styraciflua|C317048	Liquidarnbar_formosanaA|C641408	10	0.0673805	0.0912944		8	1.35137e+23
Liquidambar_styraciflua|C317130	Liquidarnbar_formosanaA|C664708	6	0.0277892	0.0405395		9	1.35137e+26
Liquidambar_styraciflua|C322858	Liquidarnbar_formosanaA|C612742	9	0.0997333	0.126193		10	1.30131e+29
Liquidambar_styraciflua|C323228	Liquidarnbar_formosanaA|scaffold31557	6	0.0677346	0.0912944		3	135136137
Liquidambar_styraciflua|C323849	Liquidarnbar_formosanaA|C449980	7	0.0389165	0.0561122		9	2.1021e+26
Liquidambar_styraciflua|C329841	Liquidarnbar_formosanaA|C276127	3	0.26192	0.284896		2	210210
Liquidambar_styraciflua|C329841	Liquidarnbar_formosanaA|C276127	3	0.26192	0.284896		2	210210
Liquidambar_styraciflua|C334915	Liquidarnbar_formosanaA|C542270	8	0.289415	0.30673		2	210210
Liquidambar_styraciflua|C336043	Liquidarnbar_formosanaA|scaffold23618	6	0.128934	0.155222		3	108109110
Liquidambar_styraciflua|C345791	Liquidarnbar_formosanaA|C631274	19	0.243393	0.271899		2	143143
Liquidambar_styraciflua|C350249	Liquidarnbar_formosanaA|C638346	6	0.0192528	0.0287632		7	1.29131e+20
Liquidambar_styraciflua|C352073	Liquidarnbar_formosanaA|C588865	7	0.131572	0.156043		7	1.29131e+20
Liquidambar_styraciflua|C362731	Liquidarnbar_formosanaA|C302229	7	0.124347	0.151166		3	59,59,60
Liquidambar_styraciflua|C370294	Liquidarnbar_formosanaA|scaffold31457	7	0.00713272	0.0113392		8	1.29131e+23
Liquidambar_styraciflua|C372485	Liquidarnbar_formosanaA|scaffold27922	6	0.0142966	0.0218862		7	1.29131e+20
Liquidambar_styraciflua|C372487	Liquidarnbar_formosanaA|scaffold28909	1	0.0973498	0.124447		6	1.35137e+17
Liquidambar_styraciflua|C374487	Liquidarnbar_formosanaA|C280057	3	0.257031	0.28457		2	143143
Liquidambar_styraciflua|C374571	Liquidarnbar_formosanaA|C649616	9	0.00128435	0.002377		11	1.18121e+32
Liquidambar_styraciflua|C375447	Liquidarnbar_formosanaA|C223933	3	0.277759	0.296915		2	143143
Liquidambar_styraciflua|C378105	Liquidarnbar_formosanaA|C655504	7	0.00379041	0.00652793		8	1.29131e+23
Liquidambar_styraciflua|C378241	Liquidarnbar_formosanaA|C502237	0	0.119996	0.147322		3	142143143
Liquidambar_styraciflua|C380275	Liquidarnbar_formosanaA|C559322	8	0.00295461	0.00516016		9	1.29129e+26
Liquidambar_styraciflua|C384095	Liquidarnbar_formosanaA|C632096	25	0.00607607	0.0100458		6	1.5816e+17
Liquidambar_styraciflua|C384701	Liquidarnbar_formosanaA|C608018	12	0.275337	0.296885		4	646648654655
Liquidambar_styraciflua|C385009	Liquidarnbar_formosanaA|scaffold12705	116	6.61945e-16	2.93147e-15		99	285,286,287,288,289,290,291,293,294,295,296,297,298,299,302,304,305,308,310,311,316,318,319,320,321,324,325,327,328,331,336,338,339,341,342,343,344,345,346,347,348,349,350,352,353,354,357,359,361,362,363,365,366,367,368,369,370,371,374,375,376,377,378,379,380,381,383,384,385,386,387,388,389,390,393,394,395,397,398,399,400,401,403,404,405,406,409,411,412,414,415,416,418,419,421,422,423,424,425
Liquidambar_styraciflua|C387730	Liquidarnbar_formosanaA|C586306	5	0.543326	0.561436		10	3.41342e+29
Liquidambar_styraciflua|C393292	Liquidarnbar_formosanaA|C417882	32	0.0876815	0.115665		53	3.41342e+158
Liquidambar_styraciflua|C393466	Liquidarnbar_formosanaA|C643468	6	0.00711425	0.0113392		68	338,339,341,342,343,344,345,346,347,348,349,350,352,353,354,357,359,361,362,363,365,366,367,368,369,370,371,374,375,376,377,378,379,380,381,383,384,385,386,387,388,389,390,393,394,395,397,398,399,400,401,403,404,405,406,409,411,412,414,415,416,418,419,421,422,423,424,425
Liquidambar_styraciflua|C395830	Liquidarnbar_formosanaA|C605092	10	9.4725e-09	3.09103e-08		68	338,339,341,342,343,344,345,346,347,348,349,350,352,353,354,357,359,361,362,363,365,366,367,368,369,370,371,374,375,376,377,378,379,380,381,383,384,385,386,387,388,389,390,393,394,395,397,398,399,400,401,403,404,405,406,409,411,412,414,415,416,418,419,421,422,423,424,425
Liquidambar_styraciflua|C396917	Liquidarnbar_formosanaA|C648630	18	2.57705e-25	3.5506e-24		90	304,305,308,310,311,316,318,319,320,321,324,325,327,328,331,333,334,336,338,339,341,342,343,344,345,346,347,348,348,349,350,351,352,353,354,357,359,361,362,363,365,366,367,368,369,370,371,374,374,375,376,377,378,379,380,381,383,384,385,386,387,388,389,390,393,394,395,397,398,399,400,401,403,404,405,406,409,411,412,414,415,416,418,418,419,421,422,423,424,425
Liquidambar_styraciflua|C398473	Liquidarnbar_formosanaA|C633636	36	1.23259e-24	1.38947e-23		84	316,318,319,320,321,324,325,325,327,328,331,333,336,338,339,341,342,343,344,345,346,347,348,349,350,352,353,354,357,359,361,362,363,365,366,366,367,368,369,370,371,374,375,376,377,378,379,380,381,383,384,385,386,387,388,388,389,390,393,393,394,395,397,398,399,400,401,403,404,405,406,409,411,412,414,415,416,418,419,421,422,423,424,425
Liquidambar_styraciflua|C400269	Liquidarnbar_formosanaA|C642896	32	4.90747e-15	1.96299e-14		85	316,318,319,320,321,324,325,327,327,328,330,331,336,337,338,339,341,342,343,344,345,346,347,348,349,350,352,353,354,357,359,361,362,363,365,366,367,367,368,369,370,371,374,375,376,377,378,379,380,381,383,384,385,386,387,388,389,390,393,394,395,397,398,399,400,401,402,403,403,404,405,406,409,411,412,414,415,416,418,419,421,422,423,424,425
Liquidambar_styraciflua|C400351	Liquidarnbar_formosanaA|C630892	4	3.99577e-15	1.65158e-14		86	316,318,319,320,321,324,325,327,327,328,330,331,336,337,338,339,341,342,343,344,345,346,347,348,349,350,352,353,354,357,359,361,362,363,365,366,367,367,368,369,370,371,374,375,376,377,378,379,380,381,383,384,385,386,387,388,389,390,392,393,394,395,397,398,399,400,401,402,403,403,404,405,406,409,411,412,414,415,416,418,419,421,422,423,424,425
Liquidambar_styraciflua|C400423	Liquidarnbar_formosanaA|C328016	7	0.334828	0.351854		11	3.97398e+32
Liquidambar_styraciflua|C400837	Liquidarnbar_formosanaA|C371877	7	0.0711507	0.0948676		38	3.65366e+113
Liquidambar_styraciflua|C402989	Liquidarnbar_formosanaA|C645892	6	7.02529e-16	3.00391e-15		85	316,318,319,320,321,324,325,327,327,328,330,331,336,337,338,339,341,342,343,344,345,346,347,348,349,350,352,353,354,357,359,361,362,363,365,366,367,367,368,369,370,371,374,375,376,377,378,379,380,381,383,384,385,386,387,388,389,390,393,394,395,397,398,399,400,401,402,403,403,404,405,406,409,411,412,414,415,416,418,419,421,422,423,424,425
Liquidambar_styraciflua|C403249	Liquidarnbar_formosanaA|C638128	8	1.34121e-14	5.03969e-14		86	316,318,318,319,320,321,324,325,327,327,328,330,331,336,337,338,339,341,342,343,344,345,346,347,348,349,350,352,353,354,357,359,361,362,363,365,366,367,367,368,369,370,371,374,375,376,377,378,379,380,381,383,384,385,386,387,388,389,390,393,394,395,397,398,399,400,401,402,403,403,404,405,406,409,411,412,414,415,416,418,419,421,422,423,424,425
Liquidambar_styraciflua|C403809	Liquidarnbar_formosanaA|C627004	8	2.91585e-20	2.00869e-19		86	316,318,319,320,321,324,325,327,327,328,330,331,336,337,338,339,341,342,343,344,345,346,347,348,349,350,352,353,354,357,359,361,362,363,365,366,367,367,368,369,370,371,374,375,376,377,378,379,380,381,383,384,385,386,387,388,389,390,393,394,395,397,398,399,400,401,401,402,403,403,404,405,406,409,411,412,414,415,416,418,419,421,422,423,424,425
Liquidambar_styraciflua|C404537	Liquidarnbar_formosanaA|C642012	15	4.31989e-16	2.06026e-15		87	316,318,319,320,321,324,325,327,327,328,330,331,336,337,338,339,339,341,342,343,344,345,346,346,347,348,349,350,352,353,354,357,359,361,362,363,365,366,367,367,368,369,370,371,374,375,376,377,378,379,380,381,383,384,385,386,387,388,389,390,393,394,395,397,398,399,400,401,402,403,403,404,405,406,409,411,412,414,415,416,418,419,421,422,423,424,425
Liquidambar_styraciflua|C406539	Liquidarnbar_formosanaA|C561274	31	7.73108e-07	2.17876e-06		69	338,339,341,342,343,344,345,346,347,348,349,350,352,353,354,357,359,361,362,363,365,366,367,368,369,370,371,374,375,376,377,378,379,380,381,383,384,385,386,387,388,389,390,393,394,395,397,398,399,400,401,403,403,404,405,406,409,411,412,414,415,416,418,419,421,422,423,424,425
Liquidambar_styraciflua|C406759	Liquidarnbar_formosanaA|C608510	13	5.45061e-07	1.60923e-06		69	338,339,341,342,343,344,345,346,347,348,349,350,352,353,354,357,359,361,362,363,365,366,367,368,369,370,371,374,375,376,377,378,379,380,381,383,384,385,386,387,388,389,390,393,394,395,397,398,399,400,401,403,403,404,405,406,409,411,412,414,415,416,418,419,421,422,423,424,425
Liquidambar_styraciflua|C406951	Liquidarnbar_formosanaA|C629362	3	2.20545e-06	5.94512e-06		69	338,339,341,342,343,344,345,346,347,348,349,350,352,353,354,357,359,361,362,363,365,366,367,368,369,370,371,374,375,376,377,378,379,380,381,383,384,385,386,387,388,389,390,393,394,395,397,398,399,400,401,403,403,404,405,406,409,411,412,414,415,416,418,419,421,422,423,424,425
Liquidambar_styraciflua|C406951	Liquidarnbar_formosanaA|C629362	3	2.20545e-06	5.94512e-06		69	338,339,341,342,343,344,345,346,347,348,349,350,352,353,354,357,359,361,362,363,365,366,367,368,369,370,371,374,375,376,377,378,379,380,381,383,384,385,386,387,388,389,390,393,394,395,397,398,399,400,401,403,403,404,405,406,409,411,412,414,415,416,418,419,421,422,423,424,425
Liquidambar_styraciflua|C407625	Liquidarnbar_formosanaA|C647234	25	2.03127e-24	2.09898e-23		85	316,318,319,320,321,324,325,327,328,331,336,336,338,339,341,342,343,344,345,346,347,348,349,350,352,353,354,357,359,361,362,363,365,366,367,368,369,370,371,374,375,376,377,378,379,380,381,383,384,385,386,387,388,389,390,392,393,394,395,397,398,399,400,401,403,403,403,404,405,406,409,410,411,412,414,415,416,417,418,419,421,422,423,424,425
Liquidambar_styraciflua|C408769	Liquidarnbar_formosanaA|C590113	7	0.000246397	0.000492794		75	336,336,338,339,341,342,343,344,345,346,347,348,349,350,352,353,354,357,359,361,362,363,365,366,367,368,369,370,371,374,375,376,377,378,379,380,381,383,384,385,386,387,388,389,390,392,393,394,395,397,398,399,400,401,403,403,403,404,405,406,409,410,411,412,414,415,416,417,418,419,421,422,423,424,425
Liquidambar_styraciflua|C408869	Liquidarnbar_formosanaA|scaffold28829	14	8.03663e-13	2.93101e-12		73	338,339,341,342,343,344,345,346,347,348,349,350,352,353,354,357,359,361,362,363,365,366,367,368,369,370,371,374,375,376,377,378,379,380,381,383,384,385,386,387,388,389,390,392,393,394,395,397,398,399,400,401,403,403,403,404,405,406,409,410,411,412,414,415,416,417,418,419,421,422,423,424,425
Liquidambar_styraciflua|C409095	Liquidarnbar_formosanaA|C651514	13	3.51196e-05	7.91787e-05		73	338,339,341,342,343,344,345,346,347,348,349,350,352,353,354,357,359,361,362,363,365,366,367,368,369,370,371,374,375,376,377,378,379,380,381,383,384,385,386,387,388,389,390,392,393,394,395,397,398,399,400,401,403,403,403,404,405,406,409,410,411,412,414,415,416,417,418,419,421,422,423,424,425
Liquidambar_styraciflua|C409107	Liquidarnbar_formosanaA|C606748	4	0.999965	1		3	403403403
Liquidambar_styraciflua|C409361	Liquidarnbar_formosanaA|scaffold30051	8	7.50474e-22	6.20391e-21		85	316,318,319,320,321,324,325,327,328,331,336,338,339,341,342,343,344,345,346,347,348,349,350,352,353,354,357,359,361,362,363,365,366,367,368,369,370,371,374,374,375,376,377,378,379,380,381,383,384,385,386,387,388,389,390,392,393,394,395,397,398,399,400,401,403,403,403,404,405,406,409,410,411,412,414,415,416,417,418,419,421,422,423,424,425
Liquidambar_styraciflua|C410071	Liquidarnbar_formosanaA|C640174	15	5.78812e-16	2.65825e-15		89	318,318,319,319,320,321,321,324,325,327,328,331,334,336,338,339,341,342,343,344,345,345,346,347,348,349,350,351,352,353,354,356,357,359,361,362,363,365,366,367,368,369,370,371,374,375,376,377,378,379,380,381,383,384,385,386,387,388,389,390,393,394,395,397,398,399,400,401,403,403,403,404,405,406,409,410,411,412,414,415,416,417,418,419,421,422,423,424,425
Liquidambar_styraciflua|C410791	Liquidarnbar_formosanaA|scaffold10106	13	8.89014e-11	2.9794e-10		74	338,339,341,342,343,344,345,346,347,348,349,350,351,352,353,354,356,357,359,361,362,363,365,366,367,368,369,370,371,374,375,376,377,378,379,380,381,383,384,385,386,387,388,389,390,393,394,395,397,398,399,400,401,403,403,403,404,405,406,409,410,411,412,414,415,416,417,418,419,421,422,423,424,425
Liquidambar_styraciflua|C412471	Liquidarnbar_formosanaA|scaffold16072	19	0.00101875	0.00194345		69	338,339,341,342,343,344,345,346,347,348,349,350,352,353,354,357,359,361,362,363,365,366,367,368,369,370,371,374,375,376,377,378,379,380,381,383,384,385,386,387,388,389,390,393,394,395,397,398,399,400,401,403,403,404,405,406,409,411,412,414,415,416,418,419,421,422,423,424,425
Liquidambar_styraciflua|C414123	Liquidarnbar_formosanaA|scaffold24426	8	1.09283e-19	6.77555e-19		80	316,318,319,320,321,324,325,327,328,331,336,338,339,341,342,343,344,345,346,347,348,349,350,352,353,354,357,359,361,362,363,365,366,367,368,369,370,371,374,375,376,377,378,379,380,381,383,384,385,386,387,388,389,390,393,394,395,397,398,399,400,401,403,403,404,405,406,409,411,412,414,415,416,418,419,421,422,423,424,425
Liquidambar_styraciflua|C414581	Liquidarnbar_formosanaA|C649502	8	3.28908e-24	3.13728e-23		82	316,318,319,320,321,324,325,327,328,331,336,338,339,341,342,343,344,345,346,347,348,349,350,352,353,354,357,359,361,362,363,365,366,367,368,369,370,371,374,375,376,376,377,378,379,380,381,383,384,385,386,386,387,388,389,390,393,394,395,397,398,399,400,401,403,403,404,405,406,409,411,412,414,415,416,418,419,421,422,423,424,425
Liquidambar_styraciflua|C417100	Liquidarnbar_formosanaA|C632218	1	0.924057	0.946968		2	376376
Liquidambar_styraciflua|C417372	Liquidarnbar_formosanaA|scaffold31877	6	8.88922e-06	2.1613e-05		69	338,339,341,342,343,344,345,346,347,348,349,350,352,353,354,357,359,361,362,363,365,366,367,368,369,370,371,374,375,376,377,378,379,380,381,383,384,385,386,387,388,389,390,393,394,395,397,398,399,400,401,403,403,404,405,406,409,411,412,414,415,416,418,419,421,422,423,424,425
Liquidambar_styraciflua|C417756	Liquidarnbar_formosanaA|C645040	6	2.13571e-16	1.05931e-15		81	316,318,319,320,321,324,325,327,328,331,336,338,339,341,342,343,344,345,346,347,348,349,350,352,353,354,357,359,361,362,363,365,366,367,368,369,370,371,374,375,376,377,378,379,380,381,383,384,385,385,386,387,388,389,390,393,394,395,397,398,399,400,401,403,403,404,405,406,409,411,412,414,415,416,418,419,421,422,423,424,425
Liquidambar_styraciflua|C417902	Liquidarnbar_formosanaA|scaffold21902	13	2.04058e-18	1.20492e-17		83	316,317,318,319,320,321,323,324,325,327,328,331,336,338,339,341,342,343,344,345,346,347,348,349,350,352,353,354,357,359,361,362,363,365,366,367,368,369,370,371,374,375,376,377,378,379,380,381,383,384,385,386,387,388,389,390,393,394,395,397,398,399,399,400,401,403,403,404,405,406,409,411,412,414,415,416,418,419,421,422,423,424,425
Liquidambar_styraciflua|C418912	Liquidarnbar_formosanaA|C629406	15	5.59723e-20	3.65293e-19		84	316,318,318,319,319,320,321,324,325,327,328,331,336,338,339,341,342,343,344,345,346,347,348,349,350,352,353,354,354,357,359,361,362,363,365,365,366,367,368,369,370,371,374,375,376,377,378,379,380,381,383,384,385,386,387,388,389,390,393,394,395,397,398,399,400,401,403,403,404,405,406,409,411,412,414,415,416,418,419,421,422,423,424,425
Liquidambar_styraciflua|C419904	Liquidarnbar_formosanaA|C552264	13	4.54364e-08	1.40853e-07		70	338,339,341,342,343,344,345,346,347,348,349,350,352,353,354,357,359,361,362,363,365,365,366,367,368,369,370,371,374,375,376,377,378,379,380,381,383,384,385,386,387,388,389,390,393,394,395,397,398,399,400,401,403,403,404,405,406,409,411,412,414,415,416,418,419,421,422,423,424,425
Liquidambar_styraciflua|C420056	Liquidarnbar_formosanaA|C647186	7	1.05154e-12	3.72546e-12		81	316,318,319,320,321,324,325,327,328,331,336,338,339,341,342,343,344,345,346,347,348,349,350,352,353,354,357,359,361,362,363,365,365,366,367,368,369,370,371,374,375,376,377,378,379,380,381,383,384,385,386,387,388,389,390,393,394,395,397,398,399,400,401,403,403,404,405,406,409,411,412,414,415,416,418,419,421,422,423,424,425
Liquidambar_styraciflua|C420206	Liquidarnbar_formosanaA|C662468	13	2.25696e-26	4.3922e-25		81	316,318,319,320,321,324,325,327,328,331,336,338,339,341,342,343,344,345,346,347,348,349,350,352,353,354,357,359,361,362,363,365,365,366,367,368,369,370,371,374,375,376,377,378,379,380,381,383,384,385,386,387,388,389,390,393,394,395,397,398,399,400,401,403,403,404,405,406,409,411,412,414,415,416,418,419,421,422,423,424,425
Liquidambar_styraciflua|C420322	Liquidarnbar_formosanaA|scaffold32816	0	1	1		2	196196
Liquidambar_styraciflua|C420948	Liquidarnbar_formosanaA|C652624	9	1.17644e-34	8.38383e-33		81	316,318,319,320,321,324,325,327,328,331,336,338,339,341,342,343,344,345,346,347,348,349,350,352,353,354,357,359,361,362,363,365,365,366,367,368,369,370,371,374,375,376,377,378,379,380,381,383,384,385,386,387,388,389,390,393,394,395,397,398,399,400,401,403,403,404,405,406,409,411,412,414,415,416,418,419,421,422,423,424,425
Liquidambar_styraciflua|C422786	Liquidarnbar_formosanaA|scaffold32408	9	2.3516e-20	1.71528e-19		82	316,318,319,320,321,324,325,327,328,331,334,336,338,339,341,342,343,344,345,346,347,348,349,350,352,353,354,357,359,361,362,363,365,365,366,367,368,369,370,371,374,375,376,377,378,379,380,381,383,384,385,386,387,388,389,390,393,394,395,397,398,399,400,401,403,403,404,405,406,409,411,412,414,415,416,418,419,421,422,423,424,425
Liquidambar_styraciflua|C423354	Liquidarnbar_formosanaA|scaffold31320	13	5.19828e-18	2.92994e-17		85	316,318,319,320,321,324,325,327,328,331,336,338,338,339,341,342,343,344,345,346,347,348,349,350,352,353,354,357,359,360,361,362,363,365,365,366,367,368,369,370,371,374,375,376,377,378,379,380,381,383,384,385,386,387,388,389,390,393,394,395,397,397,398,399,400,401,403,403,404,405,406,409,411,412,414,415,415,416,418,419,421,422,423,424,425
Liquidambar_styraciflua|C423942	Liquidarnbar_formosanaA|C603880	8	5.4803e-15	2.12362e-14		75	338,338,339,341,342,343,344,345,346,347,348,349,350,351,352,353,354,357,359,360,361,362,363,365,365,366,367,368,369,370,371,374,375,376,377,378,379,380,381,383,384,385,386,387,388,389,390,393,394,395,397,397,398,399,400,401,403,403,404,405,406,409,411,412,414,415,415,416,418,419,421,422,423,424,425
Liquidambar_styraciflua|C425834	Liquidarnbar_formosanaA|scaffold2354	15	1.13726e-25	1.76276e-24		81	316,318,319,320,321,324,325,327,328,329,331,336,338,339,341,342,343,344,345,346,347,348,349,350,352,353,354,357,359,361,362,363,365,366,367,368,369,370,371,374,375,376,377,378,379,380,381,383,384,385,386,387,388,389,390,393,394,395,397,398,399,400,401,403,403,404,405,406,409,411,412,414,415,416,418,419,421,422,423,424,425
Liquidambar_styraciflua|C425946	Liquidarnbar_formosanaA|scaffold27086	10	2.47947e-26	4.3922e-25		83	316,318,319,320,321,324,325,327,327,328,331,336,338,339,341,342,343,344,345,346,347,348,349,350,352,353,354,357,358,359,361,362,363,365,366,367,368,369,370,371,372,374,375,376,377,378,379,380,381,383,384,385,386,387,388,389,390,393,394,395,397,398,399,400,401,403,403,404,405,406,409,411,412,414,415,416,418,419,421,422,423,424,425
Liquidambar_styraciflua|C426962	Liquidarnbar_formosanaA|C660818	7	6.43348e-18	3.46848e-17		80	316,318,319,320,321,324,325,327,328,331,336,338,339,341,342,343,344,345,346,347,348,349,350,352,353,354,357,359,361,362,363,365,366,367,368,369,370,371,374,375,376,377,378,379,380,381,383,384,385,386,387,388,389,390,393,394,395,397,398,399,400,401,403,403,404,405,406,409,411,412,414,415,416,418,419,421,422,423,424,425
Liquidambar_styraciflua|C427434	Liquidarnbar_formosanaA|C539414	11	0.417624	0.435171		5	403403404405406
Liquidambar_styraciflua|C427838	Liquidarnbar_formosanaA|C657554	17	4.47909e-25	5.55407e-24		81	316,318,319,320,321,324,325,327,328,331,336,338,339,341,342,343,344,345,346,347,348,349,350,352,353,354,357,359,361,362,363,365,365,366,367,368,369,370,371,374,375,376,377,378,379,380,381,383,384,385,386,387,388,389,390,393,394,395,397,398,399,400,401,403,403,404,405,406,409,411,412,414,415,416,418,419,421,422,423,424,425
Liquidambar_styraciflua|C429618	Liquidarnbar_formosanaA|scaffold21881	9	9.39328e-33	3.88256e-31		81	316,318,319,320,321,324,325,327,328,331,336,338,339,341,342,343,344,345,346,347,348,349,350,352,353,354,357,359,361,362,363,365,365,366,367,368,369,370,371,374,375,376,377,378,379,380,381,383,384,385,386,387,388,389,390,393,394,395,397,398,399,400,401,403,403,404,405,406,409,411,412,414,415,416,418,419,421,422,423,424,425
Liquidambar_styraciflua|C429672	Liquidarnbar_formosanaA|scaffold31577	19	2.35121e-22	2.0825e-21		87	316,318,319,320,321,324,325,327,328,331,331,336,338,339,341,342,343,344,345,346,347,348,349,350,352,353,354,357,359,361,362,363,365,366,367,368,369,370,371,374,374,375,376,377,378,379,380,381,382,383,384,385,386,387,388,389,390,391,393,394,395,397,397,398,399,400,401,403,403,404,405,406,408,409,411,412,414,415,415,416,418,419,421,422,423,424,425
Liquidambar_styraciflua|C430841	Liquidarnbar_formosanaA|C661712	13	0.996009	1		2	397397
Liquidambar_styraciflua|C431627	Liquidarnbar_formosanaA|scaffold25176	6	6.94045e-31	1.72123e-29		83	316,318,319,320,321,324,325,327,328,331,336,338,339,341,342,343,344,345,346,347,348,349,350,352,353,354,357,359,361,362,363,365,366,367,368,369,370,371,374,375,376,377,378,379,380,381,383,384,385,386,387,388,389,390,393,394,395,397,397,398,399,400,401,403,403,404,405,406,408,409,411,412,414,415,415,416,418,419,421,422,423,424,425
Liquidambar_styraciflua|C434905	Liquidarnbar_formosanaA|C659700	16	4.60056e-32	1.42617e-30		81	316,318,319,320,321,324,325,327,328,331,336,338,339,341,342,343,344,345,346,347,348,349,350,352,353,354,357,359,361,362,363,365,366,367,368,369,370,371,374,375,376,377,378,379,380,381,383,384,385,386,387,388,389,390,393,394,395,397,398,399,400,401,403,403,404,405,406,406,409,411,412,414,415,416,418,419,421,422,423,424,425
Liquidambar_styraciflua|C437005	Liquidarnbar_formosanaA|scaffold33524	9	2.313e-20	1.71528e-19		81	316,318,319,320,321,324,325,327,328,331,336,338,339,341,342,343,344,345,346,347,348,349,350,352,352,353,354,357,359,361,362,363,365,366,367,368,369,370,371,374,375,376,377,378,379,380,381,383,384,385,386,387,388,389,390,393,394,395,397,398,399,400,401,403,403,404,405,406,409,411,412,414,415,416,418,419,421,422,423,424,425
Liquidambar_styraciflua|C437147	Liquidarnbar_formosanaA|C669534	15	1.35223e-34	8.38383e-33		82	311,312,316,318,319,320,321,324,325,327,328,331,336,338,339,341,342,343,344,345,346,347,348,349,350,352,353,354,357,359,361,362,363,365,366,367,368,369,370,371,374,375,376,377,378,379,380,381,383,384,385,386,387,388,389,390,393,394,395,397,398,399,400,401,403,403,404,405,406,409,411,412,414,415,416,418,419,421,422,423,424,425
Liquidambar_styraciflua|C437363	Liquidarnbar_formosanaA|scaffold6280	17	2.97769e-17	1.53847e-16		88	316,316,318,319,319,320,321,324,325,326,327,328,331,331,334,336,338,339,341,342,343,344,344,345,346,347,348,349,350,352,353,354,355,357,357,359,361,362,363,365,366,367,368,369,370,371,374,375,376,377,378,379,380,381,383,384,385,386,387,388,389,390,393,394,395,397,398,399,400,401,403,403,404,405,406,409,411,412,414,415,416,418,419,421,422,423,424,425
Gene1	Gene2	NumDiffs	Pvalue	FDRCorrectedPValue	NumRes_ClusterwHighP	ClusterLen_FracTotalLength	Coords
Liriodendron_chinense|scaffold6429	Liriodendron_tulipifera|C429703	12	0.00604119	0.00820613		4	156159169175
Liriodendron_chinense|scaffold7744	Liriodendron_tulipifera|C417219	6	1.73349e-06	1.02676e-05		5	3,4,5,6,7
Liriodendron_chinense|scaffold9386	Liriodendron_tulipifera|C380517	9	0.200128	0.214026		3	180193199
Liriodendron_chinense|scaffold11238	Liriodendron_tulipifera|scaffold19376	15	0.00110439	0.00197763		7	1.86019e+27
Liriodendron_chinense|scaffold11717	Liriodendron_tulipifera|C440757	12	9.83185e-05	0.00028324		5	597601604610611
Liriodendron_chinense|scaffold12563	Liriodendron_tulipifera|scaffold18285	8	0.122954	0.145653		2	20052013
Liriodendron_chinense|scaffold14670	Liriodendron_tulipifera|C400379	7	0.256252	0.259623		2	20052013
Liriodendron_chinense|scaffold18159	Liriodendron_tulipifera|C441715	9	0.146225	0.163179		3	288298303
Liriodendron_chinense|scaffold19673	Liriodendron_tulipifera|scaffold6448	1	0.238597	0.244959		3	288298303
Liriodendron_chinense|scaffold20892	Liriodendron_tulipifera|scaffold8075	5	0.102738	0.123606		3	84,86,91
Liriodendron_chinense|scaffold20929	Liriodendron_tulipifera|scaffold19387	8	0.0074749	0.00992358		3	583584587
Liriodendron_chinense|scaffold21521	Liriodendron_tulipifera|C436016	6	0.0380655	0.0480499		4	839855882887
Liriodendron_chinense|scaffold21533	Liriodendron_tulipifera|C415033	1	0.197305	0.213978		2	584587
Liriodendron_chinense|scaffold22148	Liriodendron_tulipifera|C405681	0	0.221199	0.231145		2	584587
Liriodendron_chinense|scaffold22155	Liriodendron_tulipifera|C387751	4	0.131376	0.148764		2	285288
Liriodendron_chinense|scaffold25949	Liriodendron_tulipifera|scaffold1693	21	0.000313363	0.000728831		5	33,34,35,36,38
Liriodendron_chinense|scaffold26125	Liriodendron_tulipifera|scaffold14074	13	0.00497488	0.00722765		5	199201204211212
Liriodendron_chinense|scaffold26771	Liriodendron_tulipifera|scaffold11022	18	2.6571e-05	8.90684e-05		7	4.29431e+20
Liriodendron_chinense|scaffold26815	Liriodendron_tulipifera|C438419	6	1.51945e-06	9.7498e-06		7	4.29431e+20
Liriodendron_chinense|scaffold28340	Liriodendron_tulipifera|C313189	0	0.000508389	0.001058		7	4.29431e+20
Liriodendron_chinense|scaffold30667	Liriodendron_tulipifera|C101794	26	0.154929	0.170422		6	89,92,95,98,100,101
Liriodendron_chinense|scaffold31717	Liriodendron_tulipifera|scaffold15880	4	6.99203e-07	4.89442e-06		23	23,26,32,37,48,53,56,62,68,71,74,80,89,92,95,98,100,101,107,107,110,113,116
Liriodendron_chinense|scaffold33328	Liriodendron_tulipifera|scaffold18137	26	3.54382e-06	1.9491e-05		9	4.31435e+26
Liriodendron_chinense|scaffold33415	Liriodendron_tulipifera|C408337	6	2.66048e-05	8.90684e-05		9	4.31435e+26
Liriodendron_chinense|scaffold34270	Liriodendron_tulipifera|scaffold7142	12	9.35323e-06	3.79052e-05		12	2.10212e+35
Liriodendron_chinense|scaffold35132	Liriodendron_tulipifera|C369684	6	0.00310225	0.00497652		7	2.19222e+20
Liriodendron_chinense|scaffold35465	Liriodendron_tulipifera|scaffold19394	7	4.84701e-05	0.000149288		5	222224225226227
Liriodendron_chinense|scaffold35798	Liriodendron_tulipifera|C318543	7	0.00531676	0.00744347		5	222224225226227
Liriodendron_chinense|scaffold36460	Liriodendron_tulipifera|scaffold22106	14	8.22306e-09	7.9147e-08		16	4.51462e+47
Liriodendron_chinense|scaffold36808	Liriodendron_tulipifera|scaffold1422	6	0.000249783	0.000620429		14	4.51462e+41
Liriodendron_chinense|scaffold40204	Liriodendron_tulipifera|C397809	7	0.131364	0.148764		4	505507519520
Liriodendron_chinense|scaffold40385	Liriodendron_tulipifera|scaffold12268	6	0.096975	0.118525		3	61,64,65
Liriodendron_chinense|scaffold40427	Liriodendron_tulipifera|C449627	20	0.000321822	0.000728831		7	5.19521e+20
Liriodendron_chinense|scaffold41302	Liriodendron_tulipifera|C342595	5	0.222139	0.231145		2	519520
Liriodendron_chinense|scaffold41399	Liriodendron_tulipifera|C410363	32	2.60886e-17	6.69607e-16		28	2,5,6,7,10,11,14,17,20,21,24,25,26,30,31,33,34,35,36,39,40,41,44,45,46,48,52,53
Liriodendron_chinense|scaffold42328	Liriodendron_tulipifera|C447741	10	1.85919e-14	2.86316e-13		18	24,25,26,30,31,33,34,35,36,39,40,41,44,45,46,48,52,53
Liriodendron_chinense|scaffold44420	Liriodendron_tulipifera|C449343	7	9.86906e-20	3.79959e-18		18	24,25,26,30,31,33,34,35,36,39,40,41,44,45,46,48,52,53
Liriodendron_chinense|scaffold44449	Liriodendron_tulipifera|scaffold18407	5	6.98815e-15	1.34522e-13		18	24,25,26,30,31,33,34,35,36,39,40,41,44,45,46,48,52,53
Liriodendron_chinense|scaffold45437	Liriodendron_tulipifera|C421723	7	5.95662e-14	7.64432e-13		18	24,25,26,30,31,33,34,35,36,39,40,41,44,45,46,48,52,53
Liriodendron_chinense|scaffold45645	Liriodendron_tulipifera|C446685	6	2.322e-20	1.78794e-18		18	24,25,26,30,31,33,34,35,36,39,40,41,44,45,46,48,52,53
Liriodendron_chinense|C453115	Liriodendron_tulipifera|scaffold13322	2	0.000896943	0.0016845		18	24,25,26,30,31,33,34,35,36,39,40,41,44,45,46,48,52,53
Liriodendron_chinense|C454635	Liriodendron_tulipifera|C275825	2	2.46084e-05	8.90684e-05		19	24,25,26,30,31,33,34,34,35,36,39,40,41,44,45,46,48,52,53
Liriodendron_chinense|C454885	Liriodendron_tulipifera|C303817	4	9.9318e-05	0.00028324		18	24,25,26,30,31,33,34,35,36,39,40,41,44,45,46,48,52,53
Liriodendron_chinense|C521908	Liriodendron_tulipifera|C185849	0	0.000151597	0.000402516		18	24,25,26,30,31,33,34,35,36,39,40,41,44,45,46,48,52,53
Liriodendron_chinense|C546799	Liriodendron_tulipifera|scaffold16294	5	4.40183e-06	2.23351e-05		19	24,25,26,30,31,33,34,35,36,39,39,40,41,44,45,46,48,52,53
Liriodendron_chinense|C564912	Liriodendron_tulipifera|C351678	8	5.13155e-07	4.39032e-06		19	24,25,26,30,31,32,33,34,35,36,39,40,41,44,45,46,48,52,53
Liriodendron_chinense|C594316	Liriodendron_tulipifera|scaffold12987	12	8.79134e-06	3.76074e-05		17	30,30,31,33,34,35,36,39,40,41,41,44,45,46,48,52,53
Liriodendron_chinense|C606296	Liriodendron_tulipifera|C413989	7	4.64106e-06	2.23351e-05		15	30,31,33,34,35,36,39,40,41,44,45,46,48,52,53
Liriodendron_chinense|C608678	Liriodendron_tulipifera|C351894	3	0.000356089	0.000761636		16	30,31,33,34,35,36,39,40,41,44,45,46,47,48,52,53
Liriodendron_chinense|C619760	Liriodendron_tulipifera|scaffold17275	9	2.894e-09	3.1834e-08		21	30,31,33,34,34,35,35,36,38,39,40,41,42,44,45,46,46,48,52,53,54
Liriodendron_chinense|C630714	Liriodendron_tulipifera|C283249	23	0.00137611	0.00235467		10	1.41142e+29
Liriodendron_chinense|C658844	Liriodendron_tulipifera|C326462	1	0.00055292	0.00112039		11	1.41142e+32
Liriodendron_chinense|C658988	Liriodendron_tulipifera|scaffold10576	6	0.498175	0.498175		4	157158159160
Liriodendron_chinense|C682877	Liriodendron_tulipifera|C307285	12	0.00473688	0.00701423		9	1.45146e+26
Liriodendron_chinense|C689389	Liriodendron_tulipifera|C200821	6	0.0686179	0.0852191		9	1.45146e+26
Liriodendron_chinense|C689401	Liriodendron_tulipifera|C301679	18	0.023062	0.0300978		6	1.34135e+17
Liriodendron_chinense|C695840	Liriodendron_tulipifera|C156943	0	0.126113	0.147132		5	134135136137138
Liriodendron_chinense|C704972	Liriodendron_tulipifera|C407799	10	0.00211317	0.00346201		6	1.34135e+17
Liriodendron_chinense|C709416	Liriodendron_tulipifera|C433531	10	0.000335364	0.0007378		6	1.34135e+17
Liriodendron_chinense|C742392	Liriodendron_tulipifera|C413734	1	0.000999419	0.00183227		6	1.34135e+17
Liriodendron_chinense|C743708	Liriodendron_tulipifera|C348426	8	0.000136164	0.000374451		7	1.32134e+20
Liriodendron_chinense|C750270	Liriodendron_tulipifera|C407487	7	0.00143343	0.00239943		6	1.34135e+17
Liriodendron_chinense|C755862	Liriodendron_tulipifera|C399937	5	0.000216739	0.000556296		6	1.34135e+17
Liriodendron_chinense|C757262	Liriodendron_tulipifera|scaffold1278	16	0.00607467	0.00820613		5	135136138138140
Liriodendron_chinense|C761342	Liriodendron_tulipifera|C412442	12	0.000842196	0.00162123		6	45,46,48,48,52,53
Liriodendron_chinense|C773067	Liriodendron_tulipifera|C351900	2	0.0259972	0.0333631		5	45,46,48,52,53
Liriodendron_chinense|C773965	Liriodendron_tulipifera|C392861	24	0.001162	0.0020335		7	4.0841e+20
Liriodendron_chinense|C774749	Liriodendron_tulipifera|scaffold15079	4	0.00520186	0.00741746		7	4.0841e+20
Liriodendron_chinense|C778833	Liriodendron_tulipifera|C408093	6	0.000692872	0.00136798		7	4.0841e+20
Liriodendron_chinense|C780803	Liriodendron_tulipifera|C401529	8	0.000305739	0.000728831		7	4.0841e+20
Liriodendron_chinense|C783411	Liriodendron_tulipifera|C423517	8	5.99981e-06	2.71756e-05		8	0,2,3,5,6,7,8,9
Liriodendron_chinense|C791667	Liriodendron_tulipifera|C361526	16	0.00443656	0.00683231		7	4.0841e+20
Liriodendron_chinense|C796465	Liriodendron_tulipifera|C317507	6	0.00350425	0.00550668		6	45,46,46,48,52,53
Liriodendron_chinense|C806535	Liriodendron_tulipifera|scaffold20828	7	6.92728e-07	4.89442e-06		22	2.62267e+65
Liriodendron_chinense|C816069	Liriodendron_tulipifera|scaffold21107	7	1.37485e-05	5.29317e-05		19	2.62267e+56
Liriodendron_chinense|C817585	Liriodendron_tulipifera|C362894	6	0.00461491	0.00696761		7	4.0841e+20
Liriodendron_chinense|C820437	Liriodendron_tulipifera|scaffold21822	16	3.09396e-05	9.92645e-05		7	4.0841e+20
Gene1	Gene2	NumDiffs	Pvalue	FDRCorrectedPValue	NumRes_ClusterwHighP	ClusterLen_FracTotalLength	Coords
Meehania_cordata|scaffold701	Meehania_fargesiiA|C353126	6	0.136319	0.15686		2	39,55
Meehania_cordata|scaffold1403	Meehania_fargesiiA|C340097	23	0.00903007	0.0176401		8	2.20224e+23
Meehania_cordata|scaffold2473	Meehania_fargesiiA|scaffold14651	10	0.00221319	0.00619692		10	2.40243e+29
Meehania_cordata|scaffold2578	Meehania_fargesiiA|scaffold10624	2	0.0454475	0.0647049		6	2.40243e+17
Meehania_cordata|scaffold4422	Meehania_fargesiiA|scaffold3744	13	0.660503	0.668461		7	3,4,5,6,7,8,9
Meehania_cordata|scaffold5618	Meehania_fargesiiA|scaffold16277	14	0.194234	0.217543		2	380381
Meehania_cordata|scaffold7026	Meehania_fargesiiA|scaffold8138	22	0.00335862	0.00806068		4	151153154155
Meehania_cordata|scaffold7817	Meehania_fargesiiA|C335603	13	0.0523345	0.0687392		4	328333336337
Meehania_cordata|scaffold9384	Meehania_fargesiiA|C333867	16	0.0470399	0.0648284		4	376379384388
Meehania_cordata|scaffold10019	Meehania_fargesiiA|scaffold16464	26	0.00744222	0.0152475		6	57,66,72,78,81,90
Meehania_cordata|scaffold10408	Meehania_fargesiiA|C360056	68	9.8314e-07	5.50558e-06		49	2.04208e+146
Meehania_cordata|scaffold10631	Meehania_fargesiiA|scaffold11648	7	0.000394855	0.00138199		12	2.08209e+35
Meehania_cordata|scaffold10877	Meehania_fargesiiA|C315944	6	0.0178778	0.0306477		11	2.08209e+32
Meehania_cordata|scaffold10947	Meehania_fargesiiA|C303117	6	0.00133938	0.00416696		11	2.08209e+32
Meehania_cordata|scaffold12698	Meehania_fargesiiA|scaffold6422	45	1.73455e-06	9.10641e-06		27	4.08413e+80
Meehania_cordata|scaffold13260	Meehania_fargesiiA|scaffold18185	14	0.825109	0.825109		2	420420
Meehania_cordata|scaffold13265	Meehania_fargesiiA|C277611	3	0.189527	0.215139		3	487487488
Meehania_cordata|scaffold13324	Meehania_fargesiiA|scaffold10509	24	0.00151417	0.00454252		13	4.08408e+38
Meehania_cordata|scaffold14173	Meehania_fargesiiA|C331719	22	0.000133545	0.000534178		14	4.08408e+41
Meehania_cordata|scaffold14345	Meehania_fargesiiA|C327198	15	0.00422229	0.0091488		14	4.08408e+41
Meehania_cordata|scaffold14864	Meehania_fargesiiA|C308190	39	4.04492e-09	2.83144e-08		28	93,95,96,97,98,101,102,103,104,105,106,107,108,109,110,112,113,114,115,116,117,118,119,120,121,122,123,125
Meehania_cordata|scaffold15077	Meehania_fargesiiA|scaffold16187	5	1.14172e-10	1.19881e-09		27	95,96,97,98,101,102,103,104,105,106,107,108,109,110,112,113,114,115,116,117,118,119,120,121,122,123,125
Meehania_cordata|scaffold15428	Meehania_fargesiiA|scaffold11592	19	1.61845e-13	2.26583e-12		16	1.12113e+47
Meehania_cordata|C54775	Meehania_fargesiiA|C296759	24	0.302774	0.317913		7	1.17118e+20
Meehania_cordata|C70467	Meehania_fargesiiA|C331315	11	0.209682	0.231754		7	1.17118e+20
Meehania_cordata|C70713	Meehania_fargesiiA|C107706	6	0.261393	0.277936		7	1.17118e+20
Meehania_cordata|C107464	Meehania_fargesiiA|C326948	6	0.0813124	0.101491		9	1.17118e+26
Meehania_cordata|C123470	Meehania_fargesiiA|C338901	9	0.0523727	0.0687392		7	1.17118e+20
Meehania_cordata|C133582	Meehania_fargesiiA|C269142	21	0.0361603	0.0542404		8	1.17118e+23
Meehania_cordata|C134044	Meehania_fargesiiA|scaffold5705	7	0.00310095	0.00789331		12	1.16117e+35
Meehania_cordata|C147208	Meehania_fargesiiA|C310038	27	0.114586	0.135567		4	147148149149
Meehania_cordata|C155684	Meehania_fargesiiA|C265317	5	0.106387	0.127664		4	147148149149
Meehania_cordata|C155894	Meehania_fargesiiA|C199748	33	0.00271812	0.00736523		12	1.2913e+35
Meehania_cordata|C157251	Meehania_fargesiiA|C234579	27	0.32784	0.339982		6	1.32133e+17
Meehania_cordata|C166796	Meehania_fargesiiA|C232105	6	0.0359163	0.0542404		7	1.32133e+20
Meehania_cordata|C182072	Meehania_fargesiiA|C353576	4	0.02695	0.0433205		7	1.32133e+20
Meehania_cordata|C193070	Meehania_fargesiiA|C348992	10	0.00785658	0.0157132		8	62,63,63,65,66,68,70,71
Meehania_cordata|C194430	Meehania_fargesiiA|C307599	15	9.92852e-05	0.000416998		15	1.32132e+44
Meehania_cordata|C200005	Meehania_fargesiiA|scaffold17701	12	0.0032317	0.0079842		11	1.32133e+32
Meehania_cordata|C200781	Meehania_fargesiiA|C304445	8	0.061403	0.0793516		7	1.32133e+20
Meehania_cordata|C201499	Meehania_fargesiiA|C222657	7	0.0985161	0.119933		7	1.32133e+20
Meehania_cordata|C201769	Meehania_fargesiiA|C319681	66	0.0273331	0.0433205		7	11,14,16,17,20,21,23
Meehania_cordata|C204065	Meehania_fargesiiA|scaffold9752	13	0.00369555	0.00862295		11	2.84284e+32
Meehania_cordata|C205449	Meehania_fargesiiA|C320927	7	0.0821595	0.101491		7	2.9029e+20
Meehania_cordata|C209807	Meehania_fargesiiA|scaffold10852	91	0.000147223	0.000562123		27	17,18,20,22,23,26,27,29,31,33,34,35,36,38,50,51,54,55,56,58,59,63,66,67,68,71,74
Meehania_cordata|C211702	Meehania_fargesiiA|C309152	7	0.0662881	0.0843667		6	3.72373e+17
Meehania_cordata|C216806	Meehania_fargesiiA|scaffold2947	6	0.456285	0.467414		6	3.72373e+17
Meehania_cordata|C218762	Meehania_fargesiiA|scaffold6848	5	0.0417853	0.060724		10	26,27,29,31,33,34,34,35,36,38
Meehania_cordata|C221116	Meehania_fargesiiA|C267867	5	0.214231	0.233707		9	33,34,35,36,38,38,39,40,41
Meehania_cordata|C222150	Meehania_fargesiiA|C310744	7	0.0419285	0.060724		15	50,51,54,55,56,58,59,63,66,67,68,70,71,72,74
Meehania_cordata|C223088	Meehania_fargesiiA|scaffold16541	10	0.117449	0.137024		6	3.72373e+17
Meehania_cordata|C223246	Meehania_fargesiiA|C310774	7	0.0165803	0.0290155		6	3.72373e+17
Meehania_cordata|C223306	Meehania_fargesiiA|C325619	5	0.0116148	0.0212096		21	29,30,31,33,34,35,36,38,50,51,54,55,56,58,59,63,66,67,68,71,74
Meehania_cordata|C225626	Meehania_fargesiiA|C325639	8	0.00424766	0.0091488		20	29,31,33,34,35,36,38,50,51,54,55,56,58,59,63,66,67,68,71,74
Meehania_cordata|C225932	Meehania_fargesiiA|C333785	7	0.00386448	0.00877342		20	29,31,33,34,35,36,38,41,50,51,54,55,56,58,59,63,66,67,67,68
Meehania_cordata|C228648	Meehania_fargesiiA|C343485	6	0.239068	0.257458		6	3.72373e+17
Meehania_cordata|C228816	Meehania_fargesiiA|C340069	0	0.0470778	0.0648284		6	3.72373e+17
Meehania_cordata|C229258	Meehania_fargesiiA|C346758	5	0.0104297	0.0199112		7	54,55,56,57,58,58,59
Meehania_cordata|C229798	Meehania_fargesiiA|C350540	11	0.0227359	0.0374474		6	3.72373e+17
Meehania_cordata|C230410	Meehania_fargesiiA|C350054	15	0.000556413	0.00186955		13	50,51,54,55,56,58,59,63,66,67,68,71,74
Meehania_cordata|C230688	Meehania_fargesiiA|scaffold12491	5	0.0112419	0.0209849		11	50,51,54,55,56,58,59,63,66,67,68
Meehania_cordata|C233460	Meehania_fargesiiA|C255699	5	0.051362	0.0687392		5	66,67,67,68,68
Meehania_cordata|C235247	Meehania_fargesiiA|scaffold12028	9	9.79302e-05	0.000416998		73	36,38,44,50,51,54,55,56,58,59,63,66,67,68,71,74,87,88,95,99,100,116,117,117,118,137,143,173,177,179,197,203,206,207,208,209,217,223,224,236,239,252,253,256,257,264,272,280,288,289,290,293,295,305,311,315,320,321,323,324,326,331,332,336,341,344,372,373,374,375,376,377,379
Meehania_cordata|C236361	Meehania_fargesiiA|C347012	15	0.00109786	0.00354693		16	50,51,54,55,56,58,59,63,66,67,68,70,71,74,74,76
Meehania_cordata|C237559	Meehania_fargesiiA|C357638	18	0.00187607	0.00543412		7	3.72373e+20
Meehania_cordata|C239695	Meehania_fargesiiA|C348296	8	4.44808e-06	2.19787e-05		77	51,54,55,56,58,59,63,66,67,68,71,74,87,88,95,99,100,105,116,117,118,137,140,143,143,173,177,178,179,197,203,206,207,208,209,217,223,224,236,239,239,252,253,253,256,257,264,272,280,288,289,290,292,293,295,305,310,315,320,321,322,323,324,326,331,332,335,336,341,344,372,373,374,375,376,377,377
Meehania_cordata|C241329	Meehania_fargesiiA|scaffold11774	7	2.06661e-05	9.64419e-05		80	51,54,55,56,58,59,63,66,67,68,71,72,74,84,87,88,95,99,100,116,117,118,136,140,143,143,173,177,178,179,197,203,206,207,208,209,217,223,224,236,239,239,252,253,253,256,257,264,272,280,288,289,290,292,293,295,296,305,307,314,315,320,321,322,323,324,326,331,332,335,336,341,344,372,373,374,375,376,377,377
Meehania_cordata|C242627	Meehania_fargesiiA|C278333	12	0.0201156	0.0337942		7	3.72373e+20
Meehania_cordata|C242669	Meehania_fargesiiA|scaffold13293	8	0.000212935	0.000777674		50	1.73175e+149
Meehania_cordata|C243377	Meehania_fargesiiA|C354380	6	0.0318034	0.049472		7	3.72373e+20
Meehania_cordata|C245061	Meehania_fargesiiA|C329450	36	0.00282242	0.00740885		9	3.70372e+26
Meehania_cordata|C245861	Meehania_fargesiiA|C349650	8	3.32323e-09	2.53774e-08		67	156,159,161,161,165,168,169,171,173,177,179,180,197,201,203,206,207,208,209,217,222,223,223,224,228,229,233,235,236,239,252,253,256,257,264,272,280,288,289,290,293,295,305,311,315,320,321,323,324,326,331,332,336,341,343,344,344,360,370,372,373,373,374,375,376,377,379
Meehania_cordata|C246569	Meehania_fargesiiA|scaffold17561	11	1.4288e-08	9.23224e-08		67	156,159,161,165,168,169,171,173,177,179,180,186,197,203,206,207,208,209,217,222,223,223,224,228,229,231,233,235,236,239,252,253,256,257,264,272,280,288,289,290,293,295,305,311,315,320,321,323,324,326,331,332,336,341,343,344,344,360,370,372,373,373,374,375,376,377,379
Meehania_cordata|C247975	Meehania_fargesiiA|C366724	7	5.22714e-14	1.0977e-12		69	156,159,161,165,168,169,171,173,177,179,180,197,198,203,206,207,208,209,217,222,223,223,224,228,229,231,233,235,236,239,252,253,256,257,264,272,280,288,289,290,293,295,305,311,315,320,321,323,324,326,331,332,335,336,341,343,344,344,360,370,372,373,373,374,375,376,377,379,384
Meehania_cordata|C248177	Meehania_fargesiiA|C283917	10	0.015061	0.0269175		7	3.72373e+20
Meehania_cordata|C249191	Meehania_fargesiiA|C368782	8	1.08881e-15	3.04866e-14		69	156,159,161,165,168,169,171,173,174,177,179,180,197,203,206,207,208,209,217,222,223,223,224,228,229,233,235,236,239,243,252,253,255,256,257,264,272,280,288,289,290,293,295,305,311,315,316,320,321,323,324,326,331,332,336,341,343,344,344,360,370,372,373,373,374,375,376,377,379
Meehania_cordata|C250849	Meehania_fargesiiA|scaffold18152	7	7.76711e-14	1.30487e-12		68	156,159,161,165,168,169,171,173,177,179,180,197,203,206,207,208,209,216,217,222,223,223,224,228,229,233,235,236,239,243,252,253,255,256,257,264,272,280,288,289,290,293,295,305,311,315,320,321,323,324,326,331,332,336,341,343,344,344,360,370,372,373,373,374,375,376,377,379
Meehania_cordata|C251567	Meehania_fargesiiA|scaffold10845	8	0.0057391	0.0120521		7	3.72373e+20
Meehania_cordata|C253209	Meehania_fargesiiA|scaffold14247	13	4.49669e-17	3.77722e-15		76	114,117,118,128,130,141,143,143,156,159,161,165,168,169,171,173,177,179,180,197,203,206,207,208,209,217,222,223,223,224,228,229,233,235,236,239,252,253,256,257,264,272,280,288,289,290,293,295,305,306,311,315,320,321,323,324,326,331,332,336,341,343,344,344,360,370,372,373,373,374,375,376,377,379,381,385
Meehania_cordata|C255433	Meehania_fargesiiA|scaffold6427	23	1.67958e-07	1.00775e-06		56	2.03206e+167
Meehania_cordata|C255437	Meehania_fargesiiA|scaffold17891	13	5.36118e-16	2.2517e-14		55	1.97203e+164
Meehania_cordata|C255545	Meehania_fargesiiA|scaffold15555	12	2.84497e-10	2.65531e-09		55	2.03206e+164
Meehania_cordata|C259207	Meehania_fargesiiA|C353822	12	6.40096e-10	5.3768e-09		54	2.03206e+161
Meehania_cordata|C259403	Meehania_fargesiiA|scaffold18848	12	1.80634e-11	2.1676e-10		58	2.03206e+173
Gene1	Gene2	NumDiffs	Pvalue	FDRCorrectedPValue	NumRes_ClusterwHighP	ClusterLen_FracTotalLength	Coords
Menispermum_canadense|scaffold1166	Menispermum_dauricumA|scaffold26412	7	0.157392	0.194117		2	96103
Menispermum_canadense|scaffold1677	Menispermum_dauricumA|scaffold17562	0	0.788928	0.803404		2	96103
Menispermum_canadense|scaffold1701	Menispermum_dauricumA|scaffold15218	10	0.0205032	0.0329833		4	231234263269
Menispermum_canadense|scaffold1743	Menispermum_dauricumA|scaffold11065	16	0.0583318	0.0819598		3	149151152
Menispermum_canadense|scaffold4098	Menispermum_dauricumA|C620811	6	0.000111127	0.000385472		14	1.02103e+41
Menispermum_canadense|scaffold5137	Menispermum_dauricumA|scaffold42575	9	1.21108e-05	5.3772e-05		12	1.15122e+35
Menispermum_canadense|scaffold6030	Menispermum_dauricumA|C590759	5	0.00389187	0.00792788		7	1.15122e+20
Menispermum_canadense|scaffold8323	Menispermum_dauricumA|scaffold27119	36	0.000959129	0.00253484		7	4.14415e+20
Menispermum_canadense|scaffold9060	Menispermum_dauricumA|scaffold19177	9	0.0788135	0.108004		5	336338339340341
Menispermum_canadense|scaffold10564	Menispermum_dauricumA|C512797	16	0.0263136	0.0400111		5	336338339340341
Menispermum_canadense|scaffold16171	Menispermum_dauricumA|C609553	15	0.00414828	0.00822248		5	336338339340341
Menispermum_canadense|scaffold18894	Menispermum_dauricumA|C171282	1	0.177084	0.202643		5	336338339340341
Menispermum_canadense|scaffold19849	Menispermum_dauricumA|scaffold21869	9	0.00216645	0.00490767		7	4.14415e+20
Menispermum_canadense|scaffold20877	Menispermum_dauricumA|scaffold1224	0	0.0894004	0.118136		5	336338339340341
Menispermum_canadense|scaffold24026	Menispermum_dauricumA|scaffold35018	8	0.0023379	0.00519014		7	4.14415e+20
Menispermum_canadense|scaffold24921	Menispermum_dauricumA|scaffold19537	4	0.000348143	0.00104443		19	3.28336e+56
Menispermum_canadense|scaffold25521	Menispermum_dauricumA|scaffold28542	2	0.016633	0.0275562		5	336338339340341
Menispermum_canadense|scaffold25678	Menispermum_dauricumA|scaffold12621	7	0.00842888	0.0155934		5	336338339340341
Menispermum_canadense|scaffold27697	Menispermum_dauricumA|C606175	8	0.00161187	0.00380676		7	4.14415e+20
Menispermum_canadense|scaffold27799	Menispermum_dauricumA|scaffold38920	7	0.0146295	0.0246042		5	336338339340341
Menispermum_canadense|scaffold28799	Menispermum_dauricumA|C655046	10	5.02966e-06	2.53769e-05		10	4.14415e+29
Menispermum_canadense|scaffold28921	Menispermum_dauricumA|scaffold26170	3	0.00897572	0.0160694		9	4.14415e+26
Menispermum_canadense|scaffold28950	Menispermum_dauricumA|C548536	6	0.055061	0.080418		5	336338339340341
Menispermum_canadense|scaffold29167	Menispermum_dauricumA|C646213	12	0.00755749	0.0143861		5	336338339340341
Menispermum_canadense|scaffold30339	Menispermum_dauricumA|scaffold35263	12	0.000305267	0.000941239		7	3.36338e+20
Menispermum_canadense|scaffold30691	Menispermum_dauricumA|scaffold2671	6	1.48725e-07	1.26988e-06		21	3.36338e+62
Menispermum_canadense|scaffold30829	Menispermum_dauricumA|scaffold34708	1	0.00764669	0.0143861		8	4.14415e+23
Menispermum_canadense|scaffold30829	Menispermum_dauricumA|scaffold34708	1	0.00764669	0.0143861		8	4.14415e+23
Menispermum_canadense|scaffold30830	Menispermum_dauricumA|C388883	1	0.0252079	0.0388622		6	4.20421e+17
Menispermum_canadense|scaffold30830	Menispermum_dauricumA|C388883	1	0.0252079	0.0388622		6	4.20421e+17
Menispermum_canadense|scaffold31102	Menispermum_dauricumA|C675851	23	7.48455e-07	4.15392e-06		9	4.08414e+26
Menispermum_canadense|scaffold32072	Menispermum_dauricumA|scaffold38711	6	0.00295489	0.00643123		7	4.14415e+20
Menispermum_canadense|scaffold33361	Menispermum_dauricumA|C665015	7	6.06559e-05	0.000240457		10	4.14415e+29
Menispermum_canadense|scaffold33405	Menispermum_dauricumA|C556704	3	0.0124536	0.021267		8	4.14415e+23
Menispermum_canadense|scaffold33603	Menispermum_dauricumA|C651416	1	0.657453	0.675715		3	420421422
Menispermum_canadense|scaffold33776	Menispermum_dauricumA|C525903	5	0.0284048	0.0426072		7	4.14415e+20
Menispermum_canadense|scaffold34134	Menispermum_dauricumA|C648753	17	0.000109745	0.000385472		10	4.04407e+29
Menispermum_canadense|scaffold34248	Menispermum_dauricumA|C676367	12	0.000550061	0.00152642		10	4.04407e+29
Menispermum_canadense|scaffold34926	Menispermum_dauricumA|scaffold33893	8	0.00115382	0.00291078		10	4.04407e+29
Menispermum_canadense|scaffold35245	Menispermum_dauricumA|C618761	7	1.1626e-05	5.37703e-05		11	4.04407e+32
Menispermum_canadense|scaffold35564	Menispermum_dauricumA|scaffold38968	11	7.29923e-05	0.000279384		10	4.04407e+29
Menispermum_canadense|scaffold35580	Menispermum_dauricumA|C648401	8	1.94918e-05	8.32151e-05		10	4.04407e+29
Menispermum_canadense|scaffold36210	Menispermum_dauricumA|scaffold40913	7	1.06597e-08	1.42641e-07		21	3.31341e+62
Menispermum_canadense|scaffold36291	Menispermum_dauricumA|scaffold35487	8	4.79256e-07	2.95541e-06		11	4.04407e+32
Menispermum_canadense|scaffold36536	Menispermum_dauricumA|scaffold29519	7	0.000194611	0.000635348		10	4.04407e+29
Menispermum_canadense|scaffold37410	Menispermum_dauricumA|C669329	8	2.08927e-07	1.54606e-06		21	3.31341e+62
Menispermum_canadense|scaffold37484	Menispermum_dauricumA|C663151	6	1.98619e-07	1.54606e-06		21	3.31341e+62
Menispermum_canadense|scaffold37667	Menispermum_dauricumA|C674299	7	2.94808e-10	8.18093e-09		23	3.31341e+68
Menispermum_canadense|scaffold37710	Menispermum_dauricumA|scaffold33915	6	0.00312039	0.00653515		10	4.04407e+29
Menispermum_canadense|scaffold37720	Menispermum_dauricumA|scaffold41171	8	1.59965e-09	3.55122e-08		23	3.31341e+68
Menispermum_canadense|scaffold37764	Menispermum_dauricumA|C651942	7	0.000238856	0.000757516		11	4.00404e+32
Menispermum_canadense|scaffold38061	Menispermum_dauricumA|scaffold36155	11	6.0697e-07	3.54598e-06		20	3.41346e+59
Menispermum_canadense|scaffold38434	Menispermum_dauricumA|scaffold42696	21	8.68872e-07	4.59261e-06		7	4.14415e+20
Menispermum_canadense|C126280	Menispermum_dauricumA|C123425	0	0.274751	0.290451		3	420421422
Menispermum_canadense|C126280	Menispermum_dauricumA|C123425	0	0.274751	0.290451		3	420421422
Menispermum_canadense|C137294	Menispermum_dauricumA|C215303	9	0.352274	0.365443		3	9,10,11
Menispermum_canadense|C147019	Menispermum_dauricumA|C189703	1	0.2543	0.276738		3	420421422
Menispermum_canadense|C150331	Menispermum_dauricumA|C139389	1	0.264241	0.284765		3	420421422
Menispermum_canadense|C154461	Menispermum_dauricumA|C173040	1	0.234235	0.262627		5	420421422426427
Menispermum_canadense|C155255	Menispermum_dauricumA|C171400	10	0.297641	0.31168		3	420421422
Menispermum_canadense|C163477	Menispermum_dauricumA|C249786	2	0.2543	0.276738		3	420421422
Menispermum_canadense|C164957	Menispermum_dauricumA|C233267	9	0.222244	0.251725		4	55,57,58,59
Menispermum_canadense|C176277	Menispermum_dauricumA|C126557	0	0.246553	0.273673		4	55,57,58,59
Menispermum_canadense|C199952	Menispermum_dauricumA|C231901	0	0.165379	0.195288		4	55,57,58,59
Menispermum_canadense|C199952	Menispermum_dauricumA|C231901	0	0.165379	0.195288		4	55,57,58,59
Menispermum_canadense|C199952	Menispermum_dauricumA|C231901	0	0.165379	0.195288		4	55,57,58,59
Menispermum_canadense|C199952	Menispermum_dauricumA|C231901	0	0.165379	0.195288		4	55,57,58,59
Menispermum_canadense|C230034	Menispermum_dauricumA|C648757	1	0.14389	0.179458		4	55,57,58,59
Menispermum_canadense|C248650	Menispermum_dauricumA|scaffold27678	13	0.177084	0.202643		5	420421422426427
Menispermum_canadense|C255358	Menispermum_dauricumA|C661629	4	0.167702	0.195946		5	420421422426427
Menispermum_canadense|C282614	Menispermum_dauricumA|C190947	13	0.120513	0.152011		4	75,76,77,78
Menispermum_canadense|C314414	Menispermum_dauricumA|C573277	16	0.0559869	0.0807084		4	62,63,64,65
Menispermum_canadense|C316076	Menispermum_dauricumA|C326203	1	0.0803014	0.108701		4	62,63,64,65
Menispermum_canadense|C399958	Menispermum_dauricumA|C630176	4	0.0204491	0.0329833		7	4.14415e+20
Menispermum_canadense|C413073	Menispermum_dauricumA|C532973	21	0.0651103	0.0903406		7	4.14415e+20
Menispermum_canadense|C421473	Menispermum_dauricumA|C434639	18	0.0451267	0.0667874		7	4.14415e+20
Menispermum_canadense|C423087	Menispermum_dauricumA|C661345	12	0.0227775	0.0361186		7	4.14415e+20
Menispermum_canadense|C441791	Menispermum_dauricumA|C504980	6	0.909282	0.917548		2	153153
Menispermum_canadense|C445057	Menispermum_dauricumA|C572452	7	0.00311432	0.00653515		9	1.73175e+26
Menispermum_canadense|C453595	Menispermum_dauricumA|C546920	5	0.0087119	0.0158528		7	4.14415e+20
Menispermum_canadense|C454075	Menispermum_dauricumA|C625215	8	0.108945	0.138999		7	4.14415e+20
Menispermum_canadense|C455631	Menispermum_dauricumA|C584527	3	0.0955321	0.124754		7	4.14415e+20
Menispermum_canadense|C459058	Menispermum_dauricumA|C650850	5	0.0842563	0.11268		4	137138140140
Menispermum_canadense|C459808	Menispermum_dauricumA|scaffold22399	7	0.0110729	0.0192046		7	4.14415e+20
Menispermum_canadense|C464692	Menispermum_dauricumA|C577697	1	0.0575126	0.0818448		7	4.14415e+20
Menispermum_canadense|C477564	Menispermum_dauricumA|C638844	3	0.00392823	0.00792788		7	4.14415e+20
Menispermum_canadense|C482288	Menispermum_dauricumA|C667507	3	0.00179794	0.00415774		7	4.14415e+20
Menispermum_canadense|C486568	Menispermum_dauricumA|C652898	5	0.00957893	0.0168772		7	4.14415e+20
Menispermum_canadense|C486784	Menispermum_dauricumA|C633756	4	0.950213	0.950213		2	188188
Menispermum_canadense|C489791	Menispermum_dauricumA|scaffold34946	9	0.00113487	0.00291078		7	4.14415e+20
Menispermum_canadense|C492495	Menispermum_dauricumA|C477632	13	0.108945	0.138999		7	4.14415e+20
Menispermum_canadense|C517341	Menispermum_dauricumA|C655248	9	0.000141532	0.000476063		8	4.14415e+23
Menispermum_canadense|C518291	Menispermum_dauricumA|C625603	6	0.00051419	0.00146346		8	4.14415e+23
Menispermum_canadense|C519163	Menispermum_dauricumA|C672607	24	0.00139746	0.00337213		7	4.14415e+20
Menispermum_canadense|C522383	Menispermum_dauricumA|scaffold33616	12	0.00121546	0.00299814		7	4.14415e+20
Menispermum_canadense|C528171	Menispermum_dauricumA|C658126	9	2.25098e-07	1.56162e-06		28	2.85291e+83
Menispermum_canadense|C529017	Menispermum_dauricumA|C650690	6	3.68857e-09	6.82385e-08		30	2.91296e+89
Menispermum_canadense|C529777	Menispermum_dauricumA|C655798	7	2.03142e-05	8.35139e-05		30	2.84291e+89
Menispermum_canadense|C531512	Menispermum_dauricumA|C659777	8	4.33364e-08	4.37303e-07		28	2.91296e+83
Menispermum_canadense|C531721	Menispermum_dauricumA|scaffold24003	10	1.08428e-07	1.00296e-06		26	2.91296e+77
Menispermum_canadense|C531941	Menispermum_dauricumA|C671215	8	0.000748008	0.0020251		6	2.96297e+17
Menispermum_canadense|C533087	Menispermum_dauricumA|C631569	7	8.30822e-06	4.00962e-05		12	3.46346e+35
Menispermum_canadense|C535201	Menispermum_dauricumA|C662159	6	1.15655e-08	1.42641e-07		29	2.91296e+86
Menispermum_canadense|C535233	Menispermum_dauricumA|C653266	9	7.78299e-05	0.000287971		27	2.91296e+80
Menispermum_canadense|C536685	Menispermum_dauricumA|scaffold39168	23	0.00040946	0.00119605		9	4.08408e+26
Menispermum_canadense|C538363	Menispermum_dauricumA|C663107	9	1.64242e-08	1.82309e-07		25	3.38346e+74
Menispermum_canadense|C538777	Menispermum_dauricumA|C669065	10	1.13835e-11	4.21191e-10		24	3.46348e+71
Menispermum_canadense|C541179	Menispermum_dauricumA|scaffold43130	8	5.69965e-09	9.03801e-08		21	3.38346e+62
Menispermum_canadense|C541373	Menispermum_dauricumA|scaffold37516	68	6.15848e-20	3.41795e-18		31	7.57759e+92
Menispermum_canadense|C542703	Menispermum_dauricumA|C677165	7	1.82035e-24	2.02059e-22		33	7.57758e+98
Menispermum_canadense|C543225	Menispermum_dauricumA|C506732	2	2.96873e-07	1.9384e-06		33	7.57758e+98
Gene1	Gene2	NumDiffs	Pvalue	FDRCorrectedPValue	NumRes_ClusterwHighP	ClusterLen_FracTotalLength	Coords
Nelumbo_lutea|scaffold105	Nelumbo_nucifera|scaffold15805	10	0.017809	0.0196328		2	342343
Nelumbo_lutea|scaffold904	Nelumbo_nucifera|C267610	16	0.0509441	0.0548398		2	482484
Nelumbo_lutea|scaffold1385	Nelumbo_nucifera|C287052	9	0.0113178	0.0127849		12	4.82485e+35
Nelumbo_lutea|scaffold2076	Nelumbo_nucifera|C235754	6	0.136524	0.141954		2	482484
Nelumbo_lutea|scaffold3771	Nelumbo_nucifera|C216834	13	0.00471543	0.00549632		4	330332336337
Nelumbo_lutea|scaffold3959	Nelumbo_nucifera|C205431	18	0.124051	0.129722		9	6,7,8,9,10,11,12,13,14
Nelumbo_lutea|scaffold4289	Nelumbo_nucifera|C210425	9	3.18648e-06	6.82975e-06		9	13,14,17,21,22,23,24,26,29
Nelumbo_lutea|scaffold4955	Nelumbo_nucifera|C210189	2	0.997521	1		2	13,14
Nelumbo_lutea|scaffold5194	Nelumbo_nucifera|C239776	17	0.0656148	0.069811		6	7,12,20,29,37,43
Nelumbo_lutea|scaffold5938	Nelumbo_nucifera|C275268	8	0.00656937	0.00756097		6	2.10217e+17
Nelumbo_lutea|scaffold7349	Nelumbo_nucifera|C214566	6	0.0779149	0.0824186		8	2.10214e+23
Nelumbo_lutea|scaffold7416	Nelumbo_nucifera|scaffold14604	15	0.00988115	0.0113016		6	2.02208e+17
Nelumbo_lutea|scaffold7864	Nelumbo_nucifera|scaffold6555	36	0.169504	0.17525		11	29,30,31,33,34,35,36,38,39,41,42
Nelumbo_lutea|scaffold8024	Nelumbo_nucifera|scaffold7995	6	3.31738e-21	6.07081e-19		30	14,15,17,20,21,22,24,26,29,30,31,33,34,35,36,38,39,41,42,47,48,50,53,56,57,58,59,62,68,71
Nelumbo_lutea|scaffold8376	Nelumbo_nucifera|C266218	8	6.8169e-20	6.23747e-18		30	17,20,21,22,24,26,29,30,31,33,34,34,35,36,38,39,41,42,47,48,50,50,53,56,57,58,59,62,68,71
Nelumbo_lutea|scaffold8450	Nelumbo_nucifera|C266916	8	4.315e-13	7.17859e-12		30	17,17,20,21,22,24,26,29,30,31,33,34,35,36,38,39,41,42,47,48,50,53,56,57,58,59,62,64,68,71
Nelumbo_lutea|scaffold8988	Nelumbo_nucifera|scaffold13724	11	6.60587e-13	9.73529e-12		34	3,5,6,9,14,22,24,26,29,30,31,33,34,35,36,38,39,41,42,47,48,50,53,56,57,58,59,60,61,62,68,70,71,72
Nelumbo_lutea|scaffold9372	Nelumbo_nucifera|scaffold17162	17	1.07493e-18	6.5571e-17		19	33,34,35,36,38,39,41,42,47,48,50,53,56,57,58,59,62,68,71
Nelumbo_lutea|scaffold9924	Nelumbo_nucifera|C266324	7	2.53314e-11	2.57536e-10		20	31,33,34,35,36,38,39,41,42,47,48,50,53,56,57,58,59,62,68,71
Nelumbo_lutea|scaffold9989	Nelumbo_nucifera|C271966	7	7.44776e-13	9.73529e-12		20	33,34,35,36,38,39,41,42,47,48,50,53,56,57,58,59,62,68,71,73
Nelumbo_lutea|scaffold10257	Nelumbo_nucifera|scaffold11701	9	2.42953e-09	1.20164e-08		19	33,34,35,36,38,39,41,42,47,48,50,53,56,57,58,59,62,68,71
Nelumbo_lutea|scaffold10335	Nelumbo_nucifera|scaffold15269	7	1.40415e-07	3.72405e-07		18	33,34,35,36,38,39,41,42,47,48,50,53,56,57,58,59,61,62
Nelumbo_lutea|scaffold10358	Nelumbo_nucifera|C286578	11	2.83128e-15	1.03625e-13		19	33,34,35,36,38,39,41,42,47,48,50,53,56,57,58,59,62,68,71
Nelumbo_lutea|scaffold11114	Nelumbo_nucifera|scaffold17239	9	4.11301e-12	5.01787e-11		19	33,34,35,36,38,39,41,42,47,48,50,53,56,57,58,59,62,68,71
Nelumbo_lutea|scaffold11151	Nelumbo_nucifera|scaffold13448	7	7.48664e-15	1.95722e-13		19	33,34,35,36,38,39,41,42,47,48,50,53,56,57,58,59,62,68,71
Nelumbo_lutea|scaffold11227	Nelumbo_nucifera|C275326	9	7.06835e-06	1.2807e-05		18	30,33,34,35,36,38,39,41,42,47,48,50,53,56,57,58,59,62
Nelumbo_lutea|scaffold11282	Nelumbo_nucifera|C277596	9	5.91099e-15	1.80285e-13		19	33,34,35,36,38,39,41,42,47,48,50,53,56,57,58,59,62,68,71
Nelumbo_lutea|scaffold11665	Nelumbo_nucifera|C276278	8	7.26878e-13	9.73529e-12		19	33,34,35,36,38,39,41,42,47,48,50,53,56,57,58,59,62,68,71
Nelumbo_lutea|scaffold12111	Nelumbo_nucifera|scaffold16606	10	1.68168e-14	3.41941e-13		20	33,34,34,35,36,38,39,41,42,47,48,50,53,56,57,58,59,62,68,71
Nelumbo_lutea|scaffold12426	Nelumbo_nucifera|C268362	6	8.94734e-08	2.6842e-07		17	33,34,35,36,38,39,41,42,47,48,50,53,56,57,58,59,62
Nelumbo_lutea|scaffold12604	Nelumbo_nucifera|C279530	16	1.55067e-15	7.09434e-14		20	33,34,35,36,38,39,41,42,47,48,50,53,56,57,58,59,60,62,68,71
Nelumbo_lutea|scaffold12947	Nelumbo_nucifera|scaffold12894	9	5.3736e-11	4.46986e-10		20	33,34,35,36,38,39,41,42,47,48,50,53,55,56,57,58,59,62,68,71
Nelumbo_lutea|scaffold12966	Nelumbo_nucifera|C143130	4	0.475069	0.488414		3	38,38,39
Nelumbo_lutea|scaffold13012	Nelumbo_nucifera|C147514	6	5.8664e-05	9.02144e-05		20	33,34,35,36,38,39,41,42,47,48,50,53,56,57,58,59,62,68,71,72
Nelumbo_lutea|scaffold13443	Nelumbo_nucifera|scaffold16063	16	1.47565e-14	3.37554e-13		19	33,34,35,36,38,39,41,42,47,48,50,53,56,57,58,59,62,68,71
Nelumbo_lutea|scaffold13718	Nelumbo_nucifera|C278612	7	1.33578e-13	2.44448e-12		19	33,34,35,36,38,39,41,42,47,48,50,53,56,57,58,59,62,68,71
Nelumbo_lutea|C57034	Nelumbo_nucifera|C205405	0	0.0156654	0.0175875		16	33,34,35,36,38,39,41,42,47,48,50,53,56,57,58,59
Nelumbo_lutea|C71428	Nelumbo_nucifera|C226610	12	0.0347043	0.0378029		11	32,33,34,35,35,36,38,38,39,41,42
Nelumbo_lutea|C71510	Nelumbo_nucifera|scaffold2518	0	0.981684	0.992532		2	35,35
Nelumbo_lutea|C73116	Nelumbo_nucifera|C156646	5	6.12185e-05	9.33583e-05		28	32,33,34,35,35,35,36,38,38,39,41,42,47,48,50,50,53,53,56,57,58,59,62,65,67,68,71,71
Nelumbo_lutea|C120090	Nelumbo_nucifera|C274070	2	6.44036e-09	2.61908e-08		28	32,33,34,35,35,36,38,38,39,41,42,47,47,48,50,50,53,53,56,57,58,59,62,65,67,68,71,71
Nelumbo_lutea|C132078	Nelumbo_nucifera|C212938	1	0.736403	0.752859		2	35,35
Nelumbo_lutea|C132876	Nelumbo_nucifera|C239244	7	9.97782e-06	1.73899e-05		24	33,34,35,36,36,38,38,39,41,42,47,48,50,53,53,56,57,58,59,62,65,68,71,71
Nelumbo_lutea|C142545	Nelumbo_nucifera|C172474	9	0.120513	0.126746		4	47,47,48,48
Nelumbo_lutea|C148762	Nelumbo_nucifera|C219328	13	2.05679e-08	6.97023e-08		20	33,34,34,35,35,36,38,39,41,42,43,47,48,50,53,56,57,57,58,59
Nelumbo_lutea|C149954	Nelumbo_nucifera|C149862	13	0.0609372	0.0652135		15	33,33,34,35,36,38,39,41,41,42,44,45,47,47,48
Nelumbo_lutea|C153520	Nelumbo_nucifera|C114234	3	1.98931e-07	5.20063e-07		25	31,33,33,34,35,36,38,39,41,41,42,44,45,47,47,48,50,53,56,57,58,59,62,62,62
Nelumbo_lutea|C153528	Nelumbo_nucifera|C133038	0	4.42525e-08	1.39624e-07		25	31,33,33,34,35,36,38,39,41,41,42,44,45,47,47,48,50,53,56,57,58,59,62,62,62
Nelumbo_lutea|C157350	Nelumbo_nucifera|C137670	1	2.76733e-09	1.25271e-08		25	31,33,33,34,35,36,38,39,41,41,42,44,45,47,47,48,50,53,56,57,58,59,62,62,62
Nelumbo_lutea|C170930	Nelumbo_nucifera|C282592	4	8.94069e-11	6.81727e-10		24	31,33,33,34,35,36,38,39,41,41,42,44,45,47,47,48,50,53,56,57,58,59,62,62
Nelumbo_lutea|C173140	Nelumbo_nucifera|C233962	11	2.85551e-09	1.25271e-08		20	32,33,34,35,36,38,39,41,42,47,47,48,50,53,56,57,58,59,62,62
Nelumbo_lutea|C189581	Nelumbo_nucifera|C225786	6	4.63083e-05	7.56644e-05		19	33,34,35,36,38,39,41,42,47,47,48,50,53,56,57,58,59,62,62
Nelumbo_lutea|C193199	Nelumbo_nucifera|C247444	9	1.99847e-08	6.90038e-08		19	33,34,35,36,38,39,41,42,47,47,48,50,53,56,57,58,59,62,62
Nelumbo_lutea|C193201	Nelumbo_nucifera|C264660	29	9.74016e-08	2.8103e-07		29	1.4915e+86
Nelumbo_lutea|C197135	Nelumbo_nucifera|scaffold15656	5	0.0368491	0.0399016		21	1.55156e+62
Nelumbo_lutea|C201469	Nelumbo_nucifera|C139784	13	0.000237178	0.000326343		17	1.68169e+50
Nelumbo_lutea|C201473	Nelumbo_nucifera|C105890	2	0.000753893	0.000964772		17	1.68169e+50
Nelumbo_lutea|C204231	Nelumbo_nucifera|C213720	15	0.899116	0.914102		5	176177178179180
Nelumbo_lutea|C204399	Nelumbo_nucifera|C250330	6	3.40191e-06	6.99495e-06		15	1.74176e+44
Nelumbo_lutea|C207863	Nelumbo_nucifera|C230912	7	2.47836e-07	6.04719e-07		14	1.74176e+41
Nelumbo_lutea|C208299	Nelumbo_nucifera|C269738	7	5.76118e-11	4.58389e-10		17	1.71174e+50
Nelumbo_lutea|C209663	Nelumbo_nucifera|C277944	8	2.37542e-09	1.20164e-08		14	1.74176e+41
Nelumbo_lutea|C210549	Nelumbo_nucifera|C200019	15	3.1965e-07	7.59688e-07		15	1.74176e+44
Nelumbo_lutea|C212403	Nelumbo_nucifera|C269658	7	2.0494e-11	2.20612e-10		16	1.74176e+47
Nelumbo_lutea|C212627	Nelumbo_nucifera|C203557	2	9.79431e-08	2.8103e-07		15	1.74176e+44
Nelumbo_lutea|C212689	Nelumbo_nucifera|C272772	3	4.71786e-07	1.10688e-06		14	1.74176e+41
Nelumbo_lutea|C213729	Nelumbo_nucifera|C111094	6	0.00058698	0.000767267		14	1.74176e+41
Nelumbo_lutea|C213763	Nelumbo_nucifera|C223854	13	1.03946e-07	2.88215e-07		14	1.74176e+41
Nelumbo_lutea|C213851	Nelumbo_nucifera|C185585	7	4.01115e-05	6.61298e-05		15	1.74176e+44
Nelumbo_lutea|C214141	Nelumbo_nucifera|C207977	3	2.41964e-08	7.90704e-08		15	1.74176e+44
Nelumbo_lutea|C214229	Nelumbo_nucifera|scaffold10483	1	0.00451455	0.00529591		9	1.76176e+26
Nelumbo_lutea|C214629	Nelumbo_nucifera|scaffold4706	9	1.00927e-09	5.59687e-09		14	1.74176e+41
Nelumbo_lutea|C214943	Nelumbo_nucifera|C228870	9	8.29581e-10	5.06044e-09		15	1.74176e+44
Nelumbo_lutea|C214977	Nelumbo_nucifera|scaffold15086	7	8.97076e-10	5.29564e-09		14	1.74176e+41
Nelumbo_lutea|C215379	Nelumbo_nucifera|C253014	5	2.88197e-07	6.93948e-07		15	1.74176e+44
Nelumbo_lutea|C215495	Nelumbo_nucifera|C269088	7	7.53204e-10	4.8233e-09		14	1.74176e+41
Nelumbo_lutea|C215681	Nelumbo_nucifera|C249730	5	1.3732e-08	4.92737e-08		14	1.74176e+41
Nelumbo_lutea|C220097	Nelumbo_nucifera|C214548	11	9.86422e-06	1.73572e-05		16	1.74176e+47
Nelumbo_lutea|C220759	Nelumbo_nucifera|scaffold13990	14	2.87508e-09	1.25271e-08		14	1.74176e+41
Nelumbo_lutea|C221019	Nelumbo_nucifera|C225116	7	6.28126e-06	1.14947e-05		14	1.74176e+41
Nelumbo_lutea|C221727	Nelumbo_nucifera|C263256	8	2.87508e-09	1.25271e-08		14	1.74176e+41
Nelumbo_lutea|C223119	Nelumbo_nucifera|C279122	11	6.7121e-10	4.54931e-09		14	1.74176e+41
Nelumbo_lutea|C223201	Nelumbo_nucifera|C261686	50	0.000206281	0.000285981		9	4.92494e+26
Nelumbo_lutea|C224355	Nelumbo_nucifera|C281672	7	5.79332e-05	8.98456e-05		22	4.10414e+65
Nelumbo_lutea|C224623	Nelumbo_nucifera|C252168	7	0.00998277	0.0113469		9	4.92494e+26
Nelumbo_lutea|C224725	Nelumbo_nucifera|C266888	12	0.000128534	0.00018668		9	4.92494e+26
Nelumbo_lutea|C226129	Nelumbo_nucifera|C208169	7	0.00381515	0.00450434		9	4.92494e+26
Nelumbo_lutea|C227187	Nelumbo_nucifera|C254680	8	3.852e-06	7.57974e-06		23	4.10414e+68
Nelumbo_lutea|C227399	Nelumbo_nucifera|C227352	6	0.00333029	0.00398328		9	4.92494e+26
Nelumbo_lutea|C227439	Nelumbo_nucifera|C225436	9	0.00255304	0.00311471		9	4.92494e+26
Nelumbo_lutea|C227545	Nelumbo_nucifera|C260622	5	0.000535986	0.000710764		10	4.88492e+29
Nelumbo_lutea|C228701	Nelumbo_nucifera|scaffold8064	7	0.00015551	0.00022233		23	4.0541e+68
Nelumbo_lutea|C229093	Nelumbo_nucifera|C267116	6	2.6536e-05	4.45513e-05		26	4.10414e+77
Nelumbo_lutea|C229107	Nelumbo_nucifera|C261024	8	0.000163135	0.000231424		23	4.10414e+68
Nelumbo_lutea|C229477	Nelumbo_nucifera|C273268	8	0.000617092	0.000800907		23	4.10414e+68
Nelumbo_lutea|C230231	Nelumbo_nucifera|scaffold4533	9	0.00291298	0.0035303		9	4.92494e+26
Nelumbo_lutea|C230303	Nelumbo_nucifera|C258278	8	4.10218e-06	7.85274e-06		32	3.51351e+95
Nelumbo_lutea|C231707	Nelumbo_nucifera|scaffold14704	8	0.00480755	0.00556823		9	4.92494e+26
Nelumbo_lutea|C231717	Nelumbo_nucifera|scaffold11094	7	0.00115635	0.0014494		9	4.92494e+26
Nelumbo_lutea|C231853	Nelumbo_nucifera|C246104	24	2.8881e-05	4.80475e-05		10	4.92494e+29
Nelumbo_lutea|C232697	Nelumbo_nucifera|C266436	6	0.000334023	0.000449457		10	4.92494e+29
Nelumbo_lutea|C234881	Nelumbo_nucifera|C273404	9	3.34193e-06	6.99495e-06		33	4.10414e+98
Nelumbo_lutea|C235647	Nelumbo_nucifera|C261204	5	0.00164271	0.00203119		10	4.92494e+29
Nelumbo_lutea|C235963	Nelumbo_nucifera|C269580	20	6.72261e-05	0.000100839		9	4.92494e+26
Nelumbo_lutea|C236813	Nelumbo_nucifera|C267272	7	0.00120345	0.00149818		9	4.92494e+26
Nelumbo_lutea|C237679	Nelumbo_nucifera|C266922	7	0.00102695	0.00130509		9	4.92494e+26
Nelumbo_lutea|C237875	Nelumbo_nucifera|scaffold5003	15	5.32926e-05	8.40736e-05		24	4.02405e+71
Nelumbo_lutea|C239255	Nelumbo_nucifera|scaffold8084	22	3.20961e-06	6.82975e-06		10	4.92494e+29
Nelumbo_lutea|C239721	Nelumbo_nucifera|scaffold2062	9	1.5847e-06	3.58025e-06		22	4.10414e+65
Nelumbo_lutea|C239869	Nelumbo_nucifera|C275214	9	7.70161e-08	2.34899e-07		35	3.7038e+104
Nelumbo_lutea|C240073	Nelumbo_nucifera|C277900	8	1.31854e-08	4.84196e-08		23	4.10414e+68
Nelumbo_lutea|C240253	Nelumbo_nucifera|C237064	8	6.42684e-05	9.71994e-05		10	4.92494e+29
Nelumbo_lutea|C240367	Nelumbo_nucifera|C256668	6	0.000664163	0.000855928		10	4.92494e+29
Nelumbo_lutea|C240513	Nelumbo_nucifera|C268264	9	1.30626e-06	2.98806e-06		27	3.80381e+80
Nelumbo_lutea|C240537	Nelumbo_nucifera|scaffold1073	16	0.000243015	0.00032942		9	4.92494e+26
Nelumbo_lutea|C240775	Nelumbo_nucifera|C276518	3	9.55299e-05	0.000140984		21	4.10414e+62
Nelumbo_lutea|C240913	Nelumbo_nucifera|C271480	7	2.24749e-08	7.478e-08		33	4.0341e+98
Nelumbo_lutea|C241219	Nelumbo_nucifera|C275772	6	8.01794e-05	0.000119291		33	4.0541e+98
Nelumbo_lutea|C241567	Nelumbo_nucifera|C256324	8	2.03178e-07	5.23683e-07		26	4.0841e+77
Nelumbo_lutea|C241629	Nelumbo_nucifera|C273548	6	1.24403e-05	2.12763e-05		23	4.10414e+68
Nelumbo_lutea|C241777	Nelumbo_nucifera|C279094	13	4.59821e-10	3.23643e-09		33	4.10414e+98
Nelumbo_lutea|C241973	Nelumbo_nucifera|scaffold14389	8	4.11633e-06	7.85274e-06		34	4.10414e+101
Nelumbo_lutea|C242111	Nelumbo_nucifera|C276306	11	2.2577e-09	1.18045e-08		32	4.10414e+95
Nelumbo_lutea|C242193	Nelumbo_nucifera|scaffold10977	8	0.000154807	0.00022233		9	4.92494e+26
Nelumbo_lutea|C242213	Nelumbo_nucifera|C275562	10	1.43655e-08	5.05555e-08		35	4.10414e+104
Nelumbo_lutea|C242243	Nelumbo_nucifera|C271318	8	5.91772e-06	1.09388e-05		32	4.10414e+95
Nelumbo_lutea|C242257	Nelumbo_nucifera|scaffold16093	13	0.00018724	0.000263577		24	4.10414e+71
Nelumbo_lutea|C242561	Nelumbo_nucifera|C260314	15	0.00318422	0.00383363		9	4.92494e+26
Nelumbo_lutea|C242827	Nelumbo_nucifera|C280876	14	0.00224194	0.00275353		9	4.92494e+26
Nelumbo_lutea|C243187	Nelumbo_nucifera|C269818	6	2.14608e-06	4.78942e-06		25	4.0741e+74
Nelumbo_lutea|C243293	Nelumbo_nucifera|scaffold16336	8	6.24682e-09	2.59811e-08		23	4.10411e+68
Nelumbo_lutea|C243413	Nelumbo_nucifera|C276452	8	2.41232e-07	5.96561e-07		36	3.51353e+107
Nelumbo_lutea|C244653	Nelumbo_nucifera|scaffold14598	8	2.14496e-05	3.63452e-05		22	4.10411e+65
Nelumbo_lutea|C244991	Nelumbo_nucifera|C273686	8	3.37358e-08	1.0831e-07		28	3.51353e+83
Nelumbo_lutea|C245807	Nelumbo_nucifera|scaffold6577	6	3.09214e-06	6.73646e-06		22	4.10411e+65
Nelumbo_lutea|C245909	Nelumbo_nucifera|scaffold456	7	4.83202e-05	7.82531e-05		22	4.10411e+65
Nelumbo_lutea|C246275	Nelumbo_nucifera|scaffold16070	7	9.82838e-08	2.8103e-07		25	4.10411e+74
Nelumbo_lutea|C246325	Nelumbo_nucifera|C270144	4	0.00381515	0.00450434		9	4.92494e+26
Nelumbo_lutea|C246637	Nelumbo_nucifera|C271066	7	4.37691e-06	8.25747e-06		23	4.10411e+68
Nelumbo_lutea|C246685	Nelumbo_nucifera|C280602	6	2.21482e-09	1.18045e-08		37	3.51353e+110
Nelumbo_lutea|C246711	Nelumbo_nucifera|C278572	17	4.46952e-06	8.34614e-06		11	4.92494e+32
Nelumbo_lutea|C246905	Nelumbo_nucifera|C262500	7	2.11831e-07	5.35295e-07		12	4.92494e+35
Nelumbo_lutea|C246945	Nelumbo_nucifera|C277104	14	1.42026e-10	1.03963e-09		25	4.10414e+74
Nelumbo_lutea|C246979	Nelumbo_nucifera|C255442	13	2.54549e-06	5.61234e-06		11	4.92494e+32
Nelumbo_lutea|C247019	Nelumbo_nucifera|scaffold12067	11	1.32294e-08	4.84196e-08		13	4.92494e+38
Nelumbo_lutea|C247639	Nelumbo_nucifera|C283414	7	3.22225e-11	2.94836e-10		26	4.10414e+77
Nelumbo_lutea|C247891	Nelumbo_nucifera|scaffold15076	7	3.81067e-06	7.57974e-06		13	4.92494e+38
Nelumbo_lutea|C248025	Nelumbo_nucifera|C280254	14	1.40226e-07	3.72405e-07		24	4.0241e+71
Nelumbo_lutea|C248097	Nelumbo_nucifera|scaffold8941	46	0.0159075	0.0177505		5	364366367372373
Nelumbo_lutea|C248101	Nelumbo_nucifera|C282612	7	1.00944e-07	2.84197e-07		40	1.53155e+119
Nelumbo_lutea|C248195	Nelumbo_nucifera|scaffold15143	6	0.0203985	0.0223529		5	364366367372373
Nelumbo_lutea|C248809	Nelumbo_nucifera|C274308	10	3.38562e-06	6.99495e-06		36	1.55162e+107
Nelumbo_lutea|C249155	Nelumbo_nucifera|C279542	8	6.98909e-09	2.78044e-08		39	1.55162e+116
Nelumbo_lutea|C249225	Nelumbo_nucifera|C276434	8	3.68739e-06	7.4977e-06		39	1.43155e+116
Nelumbo_lutea|C249403	Nelumbo_nucifera|scaffold2103	7	8.03858e-06	1.44222e-05		36	1.55162e+107
Nelumbo_lutea|C249545	Nelumbo_nucifera|C277296	7	5.21209e-05	8.36678e-05		22	2.54261e+65
Nelumbo_lutea|C249859	Nelumbo_nucifera|C275932	8	0.00057108	0.000751853		29	2.75285e+86
Nelumbo_lutea|C250237	Nelumbo_nucifera|C288084	10	1.11871e-05	1.93135e-05		38	1.55162e+113
Nelumbo_lutea|C250415	Nelumbo_nucifera|C262602	8	4.11947e-06	7.85274e-06		40	1.55162e+119
Nelumbo_lutea|C250515	Nelumbo_nucifera|C279326	7	0.000127612	0.00018668		39	1.55162e+116
Nelumbo_lutea|C250623	Nelumbo_nucifera|scaffold10007	18	2.62081e-09	1.25271e-08		32	2.54261e+95
Nelumbo_lutea|C250867	Nelumbo_nucifera|C278934	7	3.76146e-06	7.56425e-06		34	2.54254e+101
Nelumbo_lutea|C251293	Nelumbo_nucifera|scaffold15331	12	1.10157e-07	3.00877e-07		29	2.54261e+86
Nelumbo_lutea|C251785	Nelumbo_nucifera|C271750	6	0.000240946	0.000329054		29	2.75284e+86
Nelumbo_lutea|C252307	Nelumbo_nucifera|C282214	7	2.13533e-07	5.35295e-07		36	2.54261e+107
Nelumbo_lutea|C252399	Nelumbo_nucifera|C256696	8	0.00111792	0.00141089		28	2.75277e+83
Nelumbo_lutea|C252455	Nelumbo_nucifera|C280956	11	7.28263e-07	1.68699e-06		31	2.54257e+92
Nelumbo_lutea|C252975	Nelumbo_nucifera|C272870	7	8.90963e-06	1.58297e-05		29	2.54261e+86
Nelumbo_lutea|C253117	Nelumbo_nucifera|C282772	19	5.68059e-05	8.88503e-05		33	2.85286e+98
Nelumbo_lutea|C253293	Nelumbo_nucifera|C289236	8	8.60993e-09	3.35238e-08		37	2.75285e+110
Nelumbo_lutea|C253373	Nelumbo_nucifera|C287422	7	2.73239e-11	2.63172e-10		35	2.75285e+104
Nelumbo_lutea|C253747	Nelumbo_nucifera|C251514	8	0.000191413	0.000267393		36	2.85286e+107
Nelumbo_lutea|C254629	Nelumbo_nucifera|C283588	19	1.02734e-08	3.91675e-08		29	2.61275e+86
Nelumbo_lutea|C254675	Nelumbo_nucifera|C282418	10	4.78785e-08	1.48505e-07		29	2.61275e+86
Nelumbo_lutea|C254693	Nelumbo_nucifera|scaffold14107	8	5.32679e-05	8.40736e-05		27	2.75285e+80
Nelumbo_lutea|C254761	Nelumbo_nucifera|C268410	6	0.0172254	0.0191045		6	3.62364e+17
Nelumbo_lutea|C254769	Nelumbo_nucifera|C284788	1	1	1		2	285286
Nelumbo_lutea|C254893	Nelumbo_nucifera|scaffold16852	15	1.11577e-11	1.27616e-10		32	2.61275e+95
Nelumbo_lutea|C255915	Nelumbo_nucifera|scaffold7899	9	5.59847e-09	2.3826e-08		34	2.61275e+101
Nelumbo_lutea|C256389	Nelumbo_nucifera|C288744	11	9.26376e-10	5.29771e-09		31	2.75285e+92
Nelumbo_lutea|C256517	Nelumbo_nucifera|C286712	9	7.64349e-10	4.8233e-09		27	2.61275e+80
Nelumbo_lutea|C257547	Nelumbo_nucifera|scaffold16996	7	0.000441179	0.000589312		26	2.73275e+77
Nelumbo_lutea|C258205	Nelumbo_nucifera|C288216	18	4.60621e-11	4.01398e-10		32	2.39242e+95
Gene1	Gene2	NumDiffs	Pvalue	FDRCorrectedPValue	NumRes_ClusterwHighP	ClusterLen_FracTotalLength	Coords
Nyssa_ogeche|scaffold727	Nyssa_ursina|scaffold11099	27	0.00148723	0.0034769		5	231232234235236
Nyssa_ogeche|scaffold1263	Nyssa_ursina|C549028	25	0.026499	0.0352641		3	318319320
Nyssa_ogeche|scaffold2768	Nyssa_ursina|C603912	11	0.000428212	0.00151185		23	1.34137e+68
Nyssa_ogeche|scaffold3858	Nyssa_ursina|scaffold22348	9	0.0131552	0.019159		6	3.18319e+17
Nyssa_ogeche|scaffold3954	Nyssa_ursina|scaffold17536	8	0.0147228	0.0210499		6	3.18319e+17
Nyssa_ogeche|scaffold4288	Nyssa_ursina|scaffold5562	7	0.00304737	0.00603973		24	1.34137e+71
Nyssa_ogeche|scaffold6631	Nyssa_ursina|scaffold7645	8	0.00807791	0.0129814		10	2.933e+29
Nyssa_ogeche|scaffold7046	Nyssa_ursina|scaffold21437	7	0.000112409	0.000627317		12	2.953e+35
Nyssa_ogeche|scaffold7059	Nyssa_ursina|scaffold28116	20	0.00458001	0.00842917		4	2,3,4,5
Nyssa_ogeche|scaffold7539	Nyssa_ursina|scaffold19716	13	0.00240428	0.00501134		13	2.80281e+38
Nyssa_ogeche|scaffold11583	Nyssa_ursina|scaffold20086	31	0.000645443	0.00212802		10	2.87288e+29
Nyssa_ogeche|scaffold12043	Nyssa_ursina|C509692	8	0.00976723	0.0148222		11	2.87288e+32
Nyssa_ogeche|scaffold12270	Nyssa_ursina|scaffold19741	30	0.00376035	0.00714881		6	3.0931e+17
Nyssa_ogeche|scaffold13554	Nyssa_ursina|scaffold15937	8	0.00513108	0.00909741		19	2.26232e+56
Nyssa_ogeche|scaffold14158	Nyssa_ursina|C492852	7	0.00104885	0.00272988		5	309310310311313
Nyssa_ogeche|scaffold14901	Nyssa_ursina|scaffold15433	8	0.000345827	0.00142716		7	3.0931e+20
Nyssa_ogeche|scaffold15683	Nyssa_ursina|scaffold2042	17	0.0118334	0.0174973		4	235236237238
Nyssa_ogeche|scaffold16436	Nyssa_ursina|C566029	6	0.00578587	0.00991046		4	235236237238
Nyssa_ogeche|scaffold16451	Nyssa_ursina|C375525	24	0.148633	0.16071		4	28,29,30,32
Nyssa_ogeche|scaffold17299	Nyssa_ursina|C545421	6	0.0415835	0.0525106		20	29,30,32,39,41,47,56,60,61,64,69,78,81,84,86,92,93,100,106,108
Nyssa_ogeche|scaffold17316	Nyssa_ursina|scaffold4169	40	2.37968e-05	0.000195087		22	2.89291e+65
Nyssa_ogeche|scaffold17708	Nyssa_ursina|scaffold27212	10	0.000506098	0.0017511		21	2.94301e+62
Nyssa_ogeche|scaffold17907	Nyssa_ursina|scaffold29581	9	5.32715e-08	1.31657e-06		20	2.94301e+59
Nyssa_ogeche|scaffold19193	Nyssa_ursina|C491024	13	0.00105724	0.00272988		19	3.22324e+56
Nyssa_ogeche|scaffold20183	Nyssa_ursina|C613064	15	0.00072708	0.00229561		15	3.31333e+44
Nyssa_ogeche|scaffold20505	Nyssa_ursina|C577959	2	0.0683912	0.0810389		15	3.31333e+44
Nyssa_ogeche|scaffold20719	Nyssa_ursina|C613518	5	0.0188558	0.0258894		15	3.31333e+44
Nyssa_ogeche|scaffold20922	Nyssa_ursina|scaffold20712	9	3.42475e-07	5.3862e-06		28	3.24331e+83
Nyssa_ogeche|scaffold21124	Nyssa_ursina|C166125	3	0.264352	0.277169		5	540541544545547
Nyssa_ogeche|scaffold21534	Nyssa_ursina|C578955	14	2.48087e-05	0.000195087		19	3.06309e+56
Nyssa_ogeche|scaffold21854	Nyssa_ursina|scaffold23488	20	2.98079e-07	5.15676e-06		23	3.40351e+68
Nyssa_ogeche|scaffold21880	Nyssa_ursina|C624430	12	0.000276871	0.00129456		10	3.51351e+29
Nyssa_ogeche|scaffold22222	Nyssa_ursina|C524713	11	0.0316759	0.0413404		8	3.61364e+23
Nyssa_ogeche|scaffold22482	Nyssa_ursina|scaffold19093	10	0.0102021	0.0153475		9	3.61364e+26
Nyssa_ogeche|scaffold22595	Nyssa_ursina|C592393	14	0.00380325	0.00715177		12	3.40341e+35
Nyssa_ogeche|scaffold22924	Nyssa_ursina|C550292	9	0.00119618	0.00298935		14	3.3534e+41
Nyssa_ogeche|scaffold23489	Nyssa_ursina|C573631	7	0.000651937	0.00212802		13	3.40341e+38
Nyssa_ogeche|scaffold24555	Nyssa_ursina|scaffold29759	26	0.000420583	0.00151185		10	5.03512e+29
Nyssa_ogeche|scaffold24734	Nyssa_ursina|scaffold13612	17	0.00687656	0.01155		4	540541544547
Nyssa_ogeche|scaffold24890	Nyssa_ursina|scaffold30249	22	0.000162248	0.000829626		19	3.70374e+56
Nyssa_ogeche|scaffold25416	Nyssa_ursina|scaffold11452	11	0.00255092	0.00519187		29	3.74384e+86
Nyssa_ogeche|scaffold25611	Nyssa_ursina|C495872	10	0.0610398	0.0733521		4	540541544547
Nyssa_ogeche|scaffold26020	Nyssa_ursina|C576865	8	0.0610398	0.0733521		4	540541544547
Nyssa_ogeche|C98049	Nyssa_ursina|C163375	12	0.523239	0.532473		2	96,97
Nyssa_ogeche|C105171	Nyssa_ursina|C277630	8	0.38494	0.394051		3	56,57,59
Nyssa_ogeche|C133781	Nyssa_ursina|scaffold13756	7	0.118616	0.130705		5	92,92,93,96,97
Nyssa_ogeche|C156667	Nyssa_ursina|C409349	24	0.38494	0.394051		3	17,19,20
Nyssa_ogeche|C261954	Nyssa_ursina|C314546	30	0.0355138	0.04585		14	19,20,23,24,26,31,32,35,36,42,46,48,51,53
Nyssa_ogeche|C266558	Nyssa_ursina|C457420	19	0.104994	0.118719		11	1.1912e+32
Nyssa_ogeche|C277997	Nyssa_ursina|C528611	6	0.0564668	0.0702789		4	74,75,77,77
Nyssa_ogeche|C291361	Nyssa_ursina|C631892	4	0.046852	0.0587348		4	74,75,77,77
Nyssa_ogeche|C291425	Nyssa_ursina|C461512	1	0.0814619	0.0945833		4	74,75,77,77
Nyssa_ogeche|C294867	Nyssa_ursina|C317670	24	0.103602	0.117915		7	1.37137e+20
Nyssa_ogeche|C295491	Nyssa_ursina|C381525	0	0.255269	0.269278		3	69,70,71
Nyssa_ogeche|C305250	Nyssa_ursina|C589543	13	0.00810398	0.0129814		9	1.37137e+26
Nyssa_ogeche|C309128	Nyssa_ursina|C355945	8	0.000303311	0.00138086		9	1.64164e+26
Nyssa_ogeche|C309222	Nyssa_ursina|C441727	1	0.000103005	0.000593997		9	1.64164e+26
Nyssa_ogeche|C313426	Nyssa_ursina|C346416	8	0.316629	0.328005		3	151152153
Nyssa_ogeche|C319702	Nyssa_ursina|C416781	8	0.00223562	0.00483453		10	1.37137e+29
Nyssa_ogeche|C327926	Nyssa_ursina|C467532	8	0.00286407	0.00576143		23	1.35137e+68
Nyssa_ogeche|C329610	Nyssa_ursina|C534105	6	0.0160957	0.0226387		21	1.37137e+62
Nyssa_ogeche|C336292	Nyssa_ursina|scaffold21253	10	0.0257066	0.0346575		15	1.37137e+44
Nyssa_ogeche|C336606	Nyssa_ursina|C242435	5	0.111075	0.123975		15	1.37137e+44
Nyssa_ogeche|C336606	Nyssa_ursina|C242435	5	0.111075	0.123975		15	1.37137e+44
Nyssa_ogeche|C342194	Nyssa_ursina|C447895	25	0.071114	0.0831265		3	241242243
Nyssa_ogeche|C345966	Nyssa_ursina|C489488	9	0.0317819	0.0413404		6	66,70,72,73,75,78
Nyssa_ogeche|C355669	Nyssa_ursina|C628752	38	0.228598	0.242622		10	31,32,33,34,35,36,37,38,39,40
Nyssa_ogeche|C358439	Nyssa_ursina|C605854	12	2.04961e-10	1.77292e-08		26	19,21,24,25,27,28,31,32,33,34,35,36,37,38,39,40,47,48,49,50,53,54,55,56,57,59
Nyssa_ogeche|C363461	Nyssa_ursina|C587441	6	1.16407e-09	5.03459e-08		26	19,21,24,25,27,28,31,32,33,34,35,36,37,38,39,40,47,48,49,50,53,54,55,56,57,59
Nyssa_ogeche|C363467	Nyssa_ursina|C550936	17	0.00742273	0.0123474		14	31,31,32,33,33,34,35,36,37,38,39,39,40,41
Nyssa_ogeche|C364539	Nyssa_ursina|C489028	31	0.000427183	0.00151185		9	53,54,55,56,56,57,59,61,63
Nyssa_ogeche|C365226	Nyssa_ursina|C583663	10	0.000744158	0.00229891		15	1.28131e+44
Nyssa_ogeche|C365364	Nyssa_ursina|C514672	23	0.00080617	0.00238569		9	50,51,52,53,54,55,56,56,57
Nyssa_ogeche|C366207	Nyssa_ursina|C422993	13	0.000883127	0.0023872		9	50,51,52,53,54,55,56,57,59
Nyssa_ogeche|C370183	Nyssa_ursina|scaffold6836	7	0.00863029	0.0134508		7	53,53,54,55,56,57,59
Nyssa_ogeche|C372358	Nyssa_ursina|C448946	10	0.00490245	0.00883463		6	53,54,55,56,57,59
Nyssa_ogeche|C377718	Nyssa_ursina|scaffold23792	4	0.00490245	0.00883463		6	53,54,55,56,57,59
Nyssa_ogeche|C379610	Nyssa_ursina|C528391	5	0.00252529	0.00519187		7	50,53,54,55,56,57,59
Nyssa_ogeche|C385004	Nyssa_ursina|scaffold26708	6	0.00765717	0.0126161		6	53,54,55,56,57,59
Nyssa_ogeche|C386132	Nyssa_ursina|C565769	16	0.000361178	0.00145311		13	1.32133e+38
Nyssa_ogeche|C389017	Nyssa_ursina|C571955	1	0.854123	0.854123		5	53,54,55,56,57
Nyssa_ogeche|C392439	Nyssa_ursina|C555361	7	0.000416886	0.00151185		8	50,51,53,54,55,56,57,59
Nyssa_ogeche|C392459	Nyssa_ursina|C343576	5	0.00529257	0.00924863		7	53,53,54,55,56,57,59
Nyssa_ogeche|C394155	Nyssa_ursina|C537291	4	0.00657144	0.0111457		6	53,54,55,56,57,59
Nyssa_ogeche|C397662	Nyssa_ursina|C554493	7	0.00358993	0.00690065		7	50,53,54,55,56,57,59
Nyssa_ogeche|C397992	Nyssa_ursina|C583449	13	0.00229185	0.00483525		7	50,53,54,55,56,57,59
Nyssa_ogeche|C398100	Nyssa_ursina|scaffold18598	39	0.00081572	0.00238569		31	1.82185e+92
Nyssa_ogeche|C398840	Nyssa_ursina|C626254	38	1.63515e-07	3.14313e-06		22	1.80183e+65
Nyssa_ogeche|C404976	Nyssa_ursina|C523535	12	4.19169e-08	1.2086e-06		18	1.95196e+53
Nyssa_ogeche|C404990	Nyssa_ursina|C559107	17	3.81714e-06	5.07973e-05		9	2.14214e+26
Nyssa_ogeche|C407808	Nyssa_ursina|C581991	43	0.0105553	0.015742		14	36,39,46,47,54,56,58,67,68,69,79,80,90,92
Nyssa_ogeche|C407932	Nyssa_ursina|scaffold15362	10	0.00947849	0.0145113		12	1.30132e+35
Nyssa_ogeche|C408805	Nyssa_ursina|C554663	6	0.0570516	0.0704995		6	2.16217e+17
Nyssa_ogeche|C411245	Nyssa_ursina|C568957	4	0.0358072	0.0458863		6	2.16217e+17
Nyssa_ogeche|C414085	Nyssa_ursina|C534415	13	0.0691744	0.0814094		3	132132133
Nyssa_ogeche|C415093	Nyssa_ursina|scaffold6180	6	0.00927683	0.0143294		18	1.32132e+53
Nyssa_ogeche|C417989	Nyssa_ursina|C546607	8	0.000785186	0.00238311		16	1.32132e+47
Nyssa_ogeche|C419337	Nyssa_ursina|C549396	17	0.8463	0.85122		5	13,14,15,16,17
Nyssa_ogeche|C419737	Nyssa_ursina|C568803	3	0.00122684	0.00298935		14	9,11,13,14,15,16,17,21,23,26,27,29,33,35
Nyssa_ogeche|C419749	Nyssa_ursina|C410647	5	0.162842	0.174979		5	13,14,15,16,17
Nyssa_ogeche|C423104	Nyssa_ursina|scaffold11563	5	0.00160813	0.00370942		13	13,13,14,15,16,17,21,23,26,27,29,33,35
Nyssa_ogeche|C423938	Nyssa_ursina|C540775	6	0.000406469	0.00151185		12	14,15,16,17,21,23,26,27,29,33,35,35
Nyssa_ogeche|C424808	Nyssa_ursina|C439439	7	0.0392389	0.0499142		11	15,16,17,21,23,26,27,29,33,34,35
Nyssa_ogeche|C426228	Nyssa_ursina|scaffold14930	7	0.000346263	0.00142716		11	15,16,17,21,21,23,26,27,29,33,35
Nyssa_ogeche|C426562	Nyssa_ursina|C542611	8	0.127438	0.138659		9	16,17,21,23,26,27,29,33,35
Nyssa_ogeche|C427866	Nyssa_ursina|scaffold23988	25	0.776377	0.785458		8	14,15,16,17,18,19,20,21
Nyssa_ogeche|C427882	Nyssa_ursina|scaffold18513	27	0.000397168	0.00151185		16	2.12216e+47
Nyssa_ogeche|C428472	Nyssa_ursina|scaffold21525	15	0.000150609	0.000814231		14	2.12216e+41
Nyssa_ogeche|C428854	Nyssa_ursina|C578203	9	0.000171568	0.000848035		8	2.5025e+23
Nyssa_ogeche|C430969	Nyssa_ursina|C575829	20	2.62584e-05	0.000197509		9	2.16219e+26
Nyssa_ogeche|C430989	Nyssa_ursina|scaffold952	2	3.31965e-05	0.000239291		8	2.1922e+23
Nyssa_ogeche|C435493	Nyssa_ursina|scaffold16612	4	5.85514e-06	7.23529e-05		9	2.1922e+26
Nyssa_ogeche|C435495	Nyssa_ursina|C524773	7	3.61055e-05	0.00024985		27	2.12216e+80
Nyssa_ogeche|C436167	Nyssa_ursina|C188983	5	0.017364	0.0240318		8	2.1922e+23
Nyssa_ogeche|C438189	Nyssa_ursina|scaffold15268	8	2.05635e-05	0.000187236		33	2.12216e+98
Nyssa_ogeche|C438397	Nyssa_ursina|C572221	13	7.3918e-06	8.52521e-05		34	2.04212e+101
Nyssa_ogeche|C438667	Nyssa_ursina|C363985	5	0.115795	0.128414		4	345347349350
Nyssa_ogeche|C439395	Nyssa_ursina|C504174	6	0.0169827	0.0236936		14	2.50255e+41
Nyssa_ogeche|C439965	Nyssa_ursina|scaffold1650	38	0.00559184	0.00967389		13	3.41346e+38
Nyssa_ogeche|C440711	Nyssa_ursina|C558895	9	1.47283e-05	0.000149882		16	3.41342e+47
Nyssa_ogeche|C441643	Nyssa_ursina|C563281	3	0.102405	0.117324		5	341342343346347
Nyssa_ogeche|C442277	Nyssa_ursina|C536283	6	6.20414e-05	0.000397524		18	3.32334e+53
Nyssa_ogeche|C443257	Nyssa_ursina|C575303	6	0.0610561	0.0733521		3	156156157
Nyssa_ogeche|C444535	Nyssa_ursina|C389427	6	0.0596309	0.0731641		6	3.64365e+17
Nyssa_ogeche|C444707	Nyssa_ursina|scaffold20171	8	0.000638368	0.00212802		16	3.34339e+47
Nyssa_ogeche|C444855	Nyssa_ursina|C558109	10	0.00145931	0.00345837		13	3.41346e+38
Nyssa_ogeche|C445205	Nyssa_ursina|C565547	28	0.00121635	0.00298935		7	3.64365e+20
Nyssa_ogeche|C445789	Nyssa_ursina|scaffold26527	10	0.000851116	0.00238569		7	3.64365e+20
Nyssa_ogeche|C445791	Nyssa_ursina|C552345	10	5.83485e-05	0.000388242		12	3.64365e+35
Nyssa_ogeche|C446705	Nyssa_ursina|C362883	17	0.0287503	0.037968		6	3.64365e+17
Nyssa_ogeche|C450284	Nyssa_ursina|C506104	4	0.0829733	0.0956959		6	3.64365e+17
Nyssa_ogeche|C450764	Nyssa_ursina|C538767	9	0.00184774	0.00415142		7	3.64365e+20
Nyssa_ogeche|C451038	Nyssa_ursina|scaffold18738	6	0.000979366	0.00260662		7	3.64365e+20
Nyssa_ogeche|C454954	Nyssa_ursina|scaffold2701	31	0.00395453	0.00735627		8	79,80,82,87,88,90,93,95
Nyssa_ogeche|C454958	Nyssa_ursina|C549302	7	0.0160774	0.0226387		8	79,80,82,87,88,90,93,95
Nyssa_ogeche|C455094	Nyssa_ursina|C580471	7	0.00307223	0.00603973		8	79,80,82,87,88,90,93,95
Nyssa_ogeche|C455116	Nyssa_ursina|C573077	10	0.00228946	0.00483525		22	2.6427e+65
Nyssa_ogeche|C455414	Nyssa_ursina|C597221	12	0.000346478	0.00142716		25	2.57258e+74
Nyssa_ogeche|C457486	Nyssa_ursina|C503496	11	0.0131788	0.019159		13	3.40341e+38
Nyssa_ogeche|C457850	Nyssa_ursina|C569107	6	0.00205921	0.00456721		14	3.40341e+41
Nyssa_ogeche|C458040	Nyssa_ursina|C579617	6	2.38948e-05	0.000195087		25	2.64269e+74
Nyssa_ogeche|C458188	Nyssa_ursina|C605240	6	8.14624e-06	8.80812e-05		29	2.32237e+86
Nyssa_ogeche|C460420	Nyssa_ursina|scaffold14123	10	0.00850937	0.0133829		13	3.40341e+38
Nyssa_ogeche|C460658	Nyssa_ursina|scaffold10125	13	0.0651974	0.0777872		3	291291293
Nyssa_ogeche|C463440	Nyssa_ursina|scaffold18045	20	0.000729819	0.00229561		23	2.6427e+68
Nyssa_ogeche|C464481	Nyssa_ursina|scaffold29134	6	0.0139021	0.0200422		28	2.3724e+83
Nyssa_ogeche|C464627	Nyssa_ursina|C407403	4	0.12376	0.135509		3	339340341
Nyssa_ogeche|C465641	Nyssa_ursina|C604206	9	1.29674e-06	1.86947e-05		29	2.3724e+86
Nyssa_ogeche|C466721	Nyssa_ursina|C613746	5	0.000868778	0.00238569		33	2.3724e+98
Nyssa_ogeche|C466863	Nyssa_ursina|C598121	11	0.000862324	0.00238569		26	2.64267e+77
Nyssa_ogeche|C467115	Nyssa_ursina|C585795	8	7.81533e-05	0.000466225		27	2.64267e+80
Nyssa_ogeche|C468921	Nyssa_ursina|C508108	20	2.02237e-05	0.000187236		35	2.55258e+104
Nyssa_ogeche|C468965	Nyssa_ursina|scaffold24526	10	3.49631e-09	1.20972e-07		35	2.6427e+104
Nyssa_ogeche|C469075	Nyssa_ursina|C359187	3	0.00216441	0.00473979		13	2.7027e+38
Nyssa_ogeche|C469217	Nyssa_ursina|scaffold29249	12	6.66469e-08	1.44124e-06		30	2.64267e+89
Nyssa_ogeche|C470091	Nyssa_ursina|C463578	6	0.00839813	0.0133291		30	2.64267e+89
Nyssa_ogeche|C470377	Nyssa_ursina|C618046	13	9.00096e-10	5.03459e-08		29	2.64268e+86
Nyssa_ogeche|C470995	Nyssa_ursina|C611346	8	0.000202574	0.000973483		29	2.6427e+86
Nyssa_ogeche|C471161	Nyssa_ursina|C488720	8	0.00165591	0.00376939		31	2.64267e+92
Nyssa_ogeche|C472011	Nyssa_ursina|C612194	32	0.000340786	0.00142716		7	3.70371e+20
Nyssa_ogeche|C472039	Nyssa_ursina|C575231	10	0.0248818	0.0338941		12	3.41343e+35
Nyssa_ogeche|C472737	Nyssa_ursina|C616530	9	0.00110634	0.00281466		11	3.41343e+32
Nyssa_ogeche|C474581	Nyssa_ursina|C617248	13	0.00132196	0.00317638		7	3.70371e+20
Nyssa_ogeche|C475011	Nyssa_ursina|scaffold23209	7	0.00333756	0.00648761		7	3.70371e+20
Nyssa_ogeche|C475765	Nyssa_ursina|C530243	10	0.211362	0.225714		3	865867868
Nyssa_ogeche|C476839	Nyssa_ursina|C625168	8	0.0258429	0.0346575		6	3.70371e+17
Nyssa_ogeche|C477069	Nyssa_ursina|C600836	13	0.00515345	0.00909741		6	3.70371e+17
Nyssa_ogeche|C478441	Nyssa_ursina|scaffold26235	14	0.00799746	0.0129814		6	3.70371e+17
[truncated: 539 more rows]
