# Supplementary material for: Natural selection and repeated patterns of molecular evolution following allopatric divergence
Source: eLife. 2019 Aug 2;8:e45199. doi: 10.7554/eLife.45199 (PMC6744222; doi:10.7554/eLife.45199)
Supplement: Supplementary file 7. [file elife-45199-supp7.xlsx]

## Sheet: scg_kaks_add_time
Families	Gene1	Gene2	omega	Divergence time	R2	r
1	Calycanthus_chinensis|C363964	Calycanthus_occidentalis|scaffold14432	0.6289	4.6742	0.0434	0.208327
1	Cotinus_coggygria|scaffold4398	Cotinus_obovatus|scaffold12757	0.4707	1.893
1	Croomia_japonica|C823634	Croomia_paueiflora|C438392	0.3936	8.968
1	Dysosma_pleiantha|C707940	Dysosma_versipellis|C736495	0.4084	2.5943
1	Gelsemium_elegans|scaffold10711	Gelsemium_sempervirens|C241303	0.1773	8.9985
1	Liquidambar_styraciflua|C398851	Liquidambar_formosana|scaffold15022	0.1175	3.6581
1	Menispermum_canadense|scaffold3997	Menispermum_dauricum|scaffold32594	0.8838	5.089
1	Saururus_cernuus|C213155	Saururus_chinensis|C247772	1.2532	8.5509
2	Campsis_grandiflora|scaffold9512	Campsis_radicans|C322552	0.2062	3.0412	0.1292
2	Croomia_japonica|C806816	Croomia_paueiflora|C427448	0.2144	8.968
2	Gelsemium_elegans|C195752	Gelsemium_sempervirens|C247315	0.4202	8.9985
2	Hamamelis_japonica|scaffold2058	Hamamelis_vernalis|scaffold1775	0.0679	5.5288
2	Menispermum_canadense|scaffold3631	Menispermum_dauricum|scaffold9877	0.3567	5.089
3	Calycanthus_chinensis|C368298	Calycanthus_occidentalis|C362399	0.1863	4.6742	0.6529
3	Convallaria_lmajalis|C641526	Convallaria_majalis|C795427	0.1557	3.1878
3	Cornus_alternifolia|C389866	Cornus_controversa|C391848	0.1139	3.2374
3	Cornus_ellipica|scaffold29445	Cornus_florida|C384068	0.4402	10.6664
3	Croomia_japonica|C829380	Croomia_paueiflora|C453702	0.3515	8.968
3	Gelsemium_elegans|C200438	Gelsemium_sempervirens|C247381	0.2966	8.9985
3	Hamamelis_japonica|scaffold11328	Hamamelis_vernalis|C305223	0.3765	5.5288
3	Liquidambar_styraciflua|C419906	Liquidambar_formosana|C651818	0.1525	3.6581
3	Meehania_cordata|scaffold9062	Meehania_fargesii|C349522	0.1983	4.4223
3	Menispermum_canadense|scaffold8970	Menispermum_dauricum|C649046	0.3811	5.089
3	Penthorum_chinense|C200120	Penthorum_sedoides|C192631	0.1164	2.8522
3	Phryma_Aleptostachya|C477126	Phryma_leptostachya|C351831	0.221	3.5623
3	Sassafras_albidum|C456993	Sassafras_tzumu|C385316	0.076	3.6748
3	Saururus_cernuus|C210075	Saururus_chinensis|C246589	0.3479	8.5509
4	Calycanthus_chinensis|C393336	Calycanthus_occidentalis|C384784	0.1582	4.6742	0.1136
4	Campsis_grandiflora|C501967	Campsis_radicans|C357936	0.0873	3.0412
4	Convallaria_lmajalis|C659808	Convallaria_majalis|C815160	0.3957	3.1878
4	Cornus_ellipica|C544078	Cornus_florida|scaffold18967	0.2976	10.6664
4	Cotinus_coggygria|C380759	Cotinus_obovatus|C358700	0.2656	1.893
4	Croomia_japonica|C854228	Croomia_paueiflora|C476065	0.2142	8.968
4	Dysosma_pleiantha|C728084	Dysosma_versipellis|C762748	0.1158	2.5943
4	Gelsemium_elegans|C215707	Gelsemium_sempervirens|C264902	0.198	8.9985
4	Hamamelis_japonica|C382674	Hamamelis_vernalis|C325509	0.1933	5.5288
4	Liquidambar_styraciflua|C433917	Liquidambar_formosana|scaffold30129	0.0693	3.6581
4	Liriodendron_chinense|scaffold35695	Liriodendron_tulipifera|scaffold17733	0.0852	1.6912
4	Meehania_cordata|C257777	Meehania_fargesii|scaffold14237	0.0515	4.4223
4	Menispermum_canadense|scaffold38139	Menispermum_dauricum|C676919	0.257	5.089
4	Penthorum_chinense|C219026	Penthorum_sedoides|C201323	0.0867	2.8522
4	Phryma_Aleptostachya|C491388	Phryma_leptostachya|C362391	0.3278	3.5623
4	Sassafras_albidum|scaffold20511	Sassafras_tzumu|C408414	0.2635	3.6748
4	Saururus_cernuus|scaffold2109	Saururus_chinensis|scaffold6789	0.3341	8.5509
5	Convallaria_lmajalis|C650768	Convallaria_majalis|scaffold43854	0.8434	3.1878	0.0151
5	Cornus_alternifolia|C378892	Cornus_controversa|C379617	0.1251	3.2374
5	Cornus_ellipica|scaffold26427	Cornus_florida|C373446	0.1542	10.6664
5	Cotinus_coggygria|scaffold8913	Cotinus_obovatus|scaffold18289	0.1716	1.893
5	Croomia_japonica|C817628	Croomia_paueiflora|C452038	0.3968	8.968
5	Dysosma_pleiantha|scaffold29593	Dysosma_versipellis|C760920	0.3805	2.5943
5	Gelsemium_elegans|C201587	Gelsemium_sempervirens|scaffold9973	0.3872	8.9985
5	Liquidambar_styraciflua|scaffold10166	Liquidambar_formosana|scaffold29351	0.5373	3.6581
5	Meehania_cordata|C236505	Meehania_fargesii|C350346	0.4319	4.4223
5	Menispermum_canadense|scaffold31479	Menispermum_dauricum|scaffold40580	0.2723	5.089
5	Nelumbo_lutea|C229181	Nelumbo_nucifera|C261808	0.2574	3.3116
5	Penthorum_chinense|C209836	Penthorum_sedoides|C191713	0.1124	2.8522
5	Phryma_Aleptostachya|scaffold3593	Phryma_leptostachya|scaffold3833	0.0701	3.5623
5	Saururus_cernuus|C220174	Saururus_chinensis|C250643	0.0609	8.5509
6	Calycanthus_chinensis|C376286	Calycanthus_occidentalis|C366287	0.2053	4.6742	0.0038
6	Campsis_grandiflora|scaffold9690	Campsis_radicans|C347772	1.9446	3.0412
6	Convallaria_lmajalis|scaffold37039	Convallaria_majalis|scaffold19076	0.1624	3.1878
6	Croomia_japonica|scaffold26763	Croomia_paueiflora|C442658	0.1204	8.968
6	Dysosma_pleiantha|C708116	Dysosma_versipellis|C737175	0.8238	2.5943
6	Gelsemium_elegans|C196882	Gelsemium_sempervirens|C263502	0.5501	8.9985
6	Hamamelis_japonica|C357438	Hamamelis_vernalis|C304607	0.4268	5.5288
6	Liquidambar_styraciflua|C414685	Liquidambar_formosana|C651298	0.267	3.6581
6	Meehania_cordata|C237891	Meehania_fargesii|C363468	1.1255	4.4223
6	Menispermum_canadense|scaffold16693	Menispermum_dauricum|scaffold43100	0.191	5.089
6	Nelumbo_lutea|C234175	Nelumbo_nucifera|C264114	0.5692	3.3116
6	Penthorum_chinense|C198101	Penthorum_sedoides|C188052	0.2679	2.8522
6	Sassafras_albidum|C438125	Sassafras_tzumu|C369887	0.1194	3.6748
6	Saururus_cernuus|C211099	Saururus_chinensis|C256213	1.1648	8.5509
7	Calycanthus_chinensis|C379891	Calycanthus_occidentalis|scaffold16239	0.6904	4.6742	3e-05
7	Campsis_grandiflora|C494741	Campsis_radicans|C346874	0.4056	3.0412
7	Cornus_alternifolia|C391824	Cornus_controversa|C392998	0.2294	3.2374
7	Cornus_ellipica|C530528	Cornus_florida|scaffold9649	0.3563	10.6664
7	Cotinus_coggygria|scaffold18300	Cotinus_obovatus|C351424	0.3916	1.893
7	Croomia_japonica|scaffold35338	Croomia_paueiflora|C462750	0.2475	8.968
7	Dysosma_pleiantha|C719504	Dysosma_versipellis|scaffold27129	0.2036	2.5943
7	Gelsemium_elegans|scaffold11890	Gelsemium_sempervirens|scaffold12823	0.2522	8.9985
7	Hamamelis_japonica|scaffold20563	Hamamelis_vernalis|C318046	0.1104	5.5288
7	Liquidambar_styraciflua|C422908	Liquidambar_formosana|scaffold32594	0.1939	3.6581
7	Liriodendron_chinense|scaffold30202	Liriodendron_tulipifera|C442445	0.268	1.6912
7	Meehania_cordata|scaffold14346	Meehania_fargesii|scaffold18301	0.5191	4.4223
7	Menispermum_canadense|C524563	Menispermum_dauricum|C670559	0.359	5.089
7	Nelumbo_lutea|C248129	Nelumbo_nucifera|C272342	1.3527	3.3116
7	Penthorum_chinense|C206742	Penthorum_sedoides|C197341	0.0606	2.8522
7	Phryma_Aleptostachya|C471024	Phryma_leptostachya|scaffold13009	0.1906	3.5623
7	Sassafras_albidum|scaffold19917	Sassafras_tzumu|C399350	0.1058	3.6748
7	Saururus_cernuus|scaffold3992	Saururus_chinensis|scaffold853	0.5449	8.5509
8	Calycanthus_chinensis|C338715	Calycanthus_occidentalis|C341125	1.8867	4.6742	0.017
8	Convallaria_lmajalis|scaffold32387	Convallaria_majalis|scaffold36336	0.1947	3.1878
8	Cornus_ellipica|scaffold26879	Cornus_florida|C371144	0.3798	10.6664
8	Croomia_japonica|scaffold1392	Croomia_paueiflora|C417728	0.2761	8.968
8	Gelsemium_elegans|C194826	Gelsemium_sempervirens|C242443	0.272	8.9985
8	Liquidambar_styraciflua|scaffold11431	Liquidambar_formosana|scaffold30194	0.1137	3.6581
8	Meehania_cordata|scaffold10508	Meehania_fargesii|scaffold11533	0.5588	4.4223
8	Penthorum_chinense|C189155	Penthorum_sedoides|C178172	0.3378	2.8522
8	Phryma_Aleptostachya|C363559	Phryma_leptostachya|C315245	0.4233	3.5623
9	Calycanthus_chinensis|C380926	Calycanthus_occidentalis|C375052	0.0935	4.6742	0.2285
9	Campsis_grandiflora|scaffold22109	Campsis_radicans|scaffold22791	0.2156	3.0412
9	Convallaria_lmajalis|C619200	Convallaria_majalis|C773124	0.5426	3.1878
9	Cornus_alternifolia|C390614	Cornus_controversa|scaffold6131	0.0754	3.2374
9	Cornus_ellipica|C534950	Cornus_florida|C273463	0.4368	10.6664
9	Cotinus_coggygria|C363105	Cotinus_obovatus|scaffold9068	1.6219	1.893
9	Croomia_japonica|C795746	Croomia_paueiflora|C437934	0.1116	8.968
9	Dysosma_pleiantha|C716162	Dysosma_versipellis|scaffold11675	1.644	2.5943
9	Gelsemium_elegans|scaffold10406	Gelsemium_sempervirens|scaffold13747	0.2539	8.9985
9	Hamamelis_japonica|C363518	Hamamelis_vernalis|scaffold11799	0.1694	5.5288
9	Liquidambar_styraciflua|C425826	Liquidambar_formosana|C661374	0.1455	3.6581
9	Liriodendron_chinense|C779437	Liriodendron_tulipifera|scaffold19739	1.2958	1.6912
9	Meehania_cordata|C244519	Meehania_fargesii|C367094	0.1759	4.4223
9	Sassafras_albidum|C465541	Sassafras_tzumu|C400172	1.4138	3.6748
10	Cornus_alternifolia|C358674	Cornus_controversa|C374145	0.0715	3.2374	0.2317
10	Cornus_ellipica|scaffold23438	Cornus_florida|C335291	1.1741	10.6664
10	Cotinus_coggygria|scaffold14964	Cotinus_obovatus|C317746	0.3326	1.893
10	Croomia_japonica|C763189	Croomia_paueiflora|C409092	0.5543	8.968
10	Gelsemium_elegans|C194956	Gelsemium_sempervirens|scaffold12326	0.2082	8.9985
10	Hamamelis_japonica|C293200	Hamamelis_vernalis|C271216	0.5832	5.5288
10	Liquidambar_styraciflua|C365815	Liquidambar_formosana|C632872	0.1918	3.6581
10	Meehania_cordata|scaffold13984	Meehania_fargesii|scaffold817	0.1269	4.4223
10	Menispermum_canadense|C502982	Menispermum_dauricum|C616587	0.1891	5.089
10	Phryma_Aleptostachya|scaffold15097	Phryma_leptostachya|C334575	0.6139	3.5623
10	Sassafras_albidum|scaffold962	Sassafras_tzumu|C228857	1.0196	3.6748
10	Saururus_cernuus|C213501	Saururus_chinensis|scaffold11898	1.9276	8.5509
11	Convallaria_lmajalis|C642220	Convallaria_majalis|scaffold29192	0.2706	3.1878	0.0174
11	Cotinus_coggygria|C350006	Cotinus_obovatus|C318660	0.0749	1.893
11	Gelsemium_elegans|C187957	Gelsemium_sempervirens|scaffold6989	0.2268	8.9985
11	Liquidambar_styraciflua|C401385	Liquidambar_formosana|C624272	0.0588	3.6581
11	Meehania_cordata|C229808	Meehania_fargesii|scaffold15797	1.0278	4.4223
11	Menispermum_canadense|C505728	Menispermum_dauricum|C623343	0.411	5.089
11	Phryma_Aleptostachya|C454757	Phryma_leptostachya|C328563	0.2333	3.5623
12	Calycanthus_chinensis|C366242	Calycanthus_occidentalis|C361615	0.3306	4.6742	0.0795
12	Convallaria_lmajalis|C621998	Convallaria_majalis|scaffold39616	0.5995	3.1878
12	Cornus_alternifolia|scaffold20891	Cornus_controversa|C381191	0.4315	3.2374
12	Cornus_ellipica|C508995	Cornus_florida|C374558	0.523	10.6664
12	Cotinus_coggygria|scaffold9985	Cotinus_obovatus|C338039	1.683	1.893
12	Croomia_japonica|C813854	Croomia_paueiflora|C449542	0.5106	8.968
12	Dysosma_pleiantha|C708492	Dysosma_versipellis|scaffold18025	0.6208	2.5943
12	Gelsemium_elegans|C196642	Gelsemium_sempervirens|C246839	0.0876	8.9985
12	Hamamelis_japonica|C360966	Hamamelis_vernalis|C316558	0.8816	5.5288
12	Liquidambar_styraciflua|C412221	Liquidambar_formosana|scaffold19546	0.3123	3.6581
12	Meehania_cordata|C236469	Meehania_fargesii|scaffold10887	0.0708	4.4223
12	Menispermum_canadense|scaffold19776	Menispermum_dauricum|C648912	0.1085	5.089
12	Nelumbo_lutea|C230097	Nelumbo_nucifera|scaffold11646	0.2775	3.3116
12	Penthorum_chinense|C199754	Penthorum_sedoides|C191795	0.7503	2.8522
12	Phryma_Aleptostachya|C458879	Phryma_leptostachya|C328155	0.2232	3.5623
12	Sassafras_albidum|scaffold9064	Sassafras_tzumu|C380890	0.6455	3.6748
12	Saururus_cernuus|C208245	Saururus_chinensis|scaffold10583	0.5428	8.5509
13	Calycanthus_chinensis|C366250	Calycanthus_occidentalis|C356549	0.3708	4.6742	0.152
13	Cornus_ellipica|C522725	Cornus_florida|C344059	0.1804	10.6664
13	Croomia_japonica|scaffold30560	Croomia_paueiflora|C446216	0.3412	8.968
13	Gelsemium_elegans|C194774	Gelsemium_sempervirens|scaffold9072	0.4956	8.9985
13	Hamamelis_japonica|scaffold15686	Hamamelis_vernalis|C303643	0.3706	5.5288
13	Liquidambar_styraciflua|C403315	Liquidambar_formosana|C626538	0.2301	3.6581
13	Meehania_cordata|C224058	Meehania_fargesii|C344794	0.1754	4.4223
13	Penthorum_chinense|C196043	Penthorum_sedoides|C197983	1.0081	2.8522
13	Phryma_Aleptostachya|C454901	Phryma_leptostachya|C332493	0.425	3.5623
13	Sassafras_albidum|C429815	Sassafras_tzumu|C376886	0.2889	3.6748
13	Saururus_cernuus|C226952	Saururus_chinensis|scaffold15457	0.0667	8.5509
14	Calycanthus_chinensis|C360300	Calycanthus_occidentalis|C349513	0.5589	4.6742	0.0398
14	Cornus_alternifolia|C382412	Cornus_controversa|C393988	0.1497	3.2374
14	Cornus_ellipica|C519709	Cornus_florida|C380158	0.1814	10.6664
14	Cotinus_coggygria|scaffold17442	Cotinus_obovatus|C335649	0.0613	1.893
14	Croomia_japonica|C824576	Croomia_paueiflora|scaffold16647	0.401	8.968
14	Dysosma_pleiantha|scaffold25394	Dysosma_versipellis|C730895	0.113	2.5943
14	Gelsemium_elegans|C195766	Gelsemium_sempervirens|C250401	0.5535	8.9985
14	Hamamelis_japonica|C368184	Hamamelis_vernalis|C302029	0.301	5.5288
14	Liquidambar_styraciflua|scaffold1987	Liquidambar_formosana|C658358	0.7583	3.6581
14	Meehania_cordata|C238617	Meehania_fargesii|C357758	0.565	4.4223
14	Menispermum_canadense|C526401	Menispermum_dauricum|scaffold10525	0.1956	5.089
14	Phryma_Aleptostachya|scaffold13141	Phryma_leptostachya|scaffold16588	0.1284	3.5623
14	Sassafras_albidum|C447913	Sassafras_tzumu|C370487	0.1099	3.6748
14	Saururus_cernuus|C216524	Saururus_chinensis|C252211	0.2396	8.5509
15	Cornus_ellipica|scaffold24473	Cornus_florida|C374784	0.0885	10.6664	0.193
15	Croomia_japonica|scaffold25070	Croomia_paueiflora|C440772	0.1462	8.968
15	Gelsemium_elegans|C189471	Gelsemium_sempervirens|scaffold10436	0.0315	8.9985
15	Hamamelis_japonica|C357430	Hamamelis_vernalis|scaffold16137	0.5828	5.5288
15	Liquidambar_styraciflua|C417986	Liquidambar_formosana|C648414	0.0791	3.6581
15	Liriodendron_chinense|scaffold29359	Liriodendron_tulipifera|C408927	0.3299	1.6912
15	Nelumbo_lutea|C226335	Nelumbo_nucifera|C263772	0.3531	3.3116
15	Phryma_Aleptostachya|scaffold15122	Phryma_leptostachya|C339653	0.1029	3.5623
15	Sassafras_albidum|C432406	Sassafras_tzumu|C374101	1.0687	3.6748
15	Saururus_cernuus|C203053	Saururus_chinensis|C248564	0.0749	8.5509
16	Calycanthus_chinensis|scaffold17143	Calycanthus_occidentalis|scaffold19102	0.3148	4.6742	0.174
16	Cornus_ellipica|C524011	Cornus_florida|C377702	0.0957	10.6664
16	Cotinus_coggygria|C354667	Cotinus_obovatus|C330887	0.5502	1.893
16	Croomia_japonica|C811364	Croomia_paueiflora|C445556	0.2015	8.968
16	Dysosma_pleiantha|C701920	Dysosma_versipellis|C729319	0.3995	2.5943
16	Gelsemium_elegans|C195388	Gelsemium_sempervirens|scaffold13043	0.5497	8.9985
16	Hamamelis_japonica|C357778	Hamamelis_vernalis|C301199	0.0833	5.5288
16	Penthorum_chinense|C214196	Penthorum_sedoides|C202401	0.4127	2.8522
16	Sassafras_albidum|C404571	Sassafras_tzumu|C366152	0.1327	3.6748
16	Saururus_cernuus|scaffold4394	Saururus_chinensis|scaffold8135	0.1361	8.5509
17	Calycanthus_chinensis|C382984	Calycanthus_occidentalis|scaffold20011	1.0447	4.6742	0.014
17	Convallaria_lmajalis|scaffold22452	Convallaria_majalis|scaffold41726	0.3691	3.1878
17	Cornus_ellipica|scaffold22352	Cornus_florida|C380202	0.6016	10.6664
17	Cotinus_coggygria|C361025	Cotinus_obovatus|scaffold9570	0.1548	1.893
17	Croomia_japonica|scaffold31832	Croomia_paueiflora|C454938	0.5475	8.968
17	Dysosma_pleiantha|scaffold13879	Dysosma_versipellis|scaffold29880	1.3222	2.5943
17	Gelsemium_elegans|scaffold10253	Gelsemium_sempervirens|scaffold1706	0.5883	8.9985
17	Hamamelis_japonica|C368324	Hamamelis_vernalis|scaffold12989	0.2731	5.5288
17	Liquidambar_styraciflua|C428004	Liquidambar_formosana|C654348	0.164	3.6581
17	Meehania_cordata|C246479	Meehania_fargesii|scaffold12336	0.0571	4.4223
17	Menispermum_canadense|scaffold14328	Menispermum_dauricum|C658510	0.8495	5.089
17	Nelumbo_lutea|C217553	Nelumbo_nucifera|C264150	0.4174	3.3116
17	Penthorum_chinense|C209108	Penthorum_sedoides|C198299	0.6264	2.8522
17	Phryma_Aleptostachya|C470144	Phryma_leptostachya|C345837	0.2625	3.5623
17	Saururus_cernuus|C222398	Saururus_chinensis|scaffold13662	0.6652	8.5509
18	Calycanthus_chinensis|C371350	Calycanthus_occidentalis|C366501	0.1896	4.6742	0.1179
18	Campsis_grandiflora|scaffold9570	Campsis_radicans|C344210	0.2029	3.0412
18	Convallaria_lmajalis|C654196	Convallaria_majalis|scaffold5035	0.116	3.1878
18	Cornus_alternifolia|C388418	Cornus_controversa|C396022	0.7567	3.2374
18	Cornus_ellipica|scaffold30130	Cornus_florida|C386302	0.0634	10.6664
18	Croomia_japonica|scaffold22780	Croomia_paueiflora|C462140	0.1107	8.968
18	Dysosma_pleiantha|C715664	Dysosma_versipellis|C750128	0.0832	2.5943
18	Gelsemium_elegans|C202291	Gelsemium_sempervirens|C257884	0.2345	8.9985
18	Hamamelis_japonica|scaffold17213	Hamamelis_vernalis|C313258	0.3776	5.5288
18	Liquidambar_styraciflua|C429826	Liquidambar_formosana|C666956	0.3198	3.6581
18	Meehania_cordata|C244337	Meehania_fargesii|scaffold139	0.4141	4.4223
18	Nelumbo_lutea|C241267	Nelumbo_nucifera|C270834	1.147	3.3116
18	Penthorum_chinense|C212372	Penthorum_sedoides|C203055	0.2606	2.8522
18	Phryma_Aleptostachya|C479850	Phryma_leptostachya|C348403	0.1292	3.5623
18	Sassafras_albidum|C460193	Sassafras_tzumu|scaffold3960	0.3443	3.6748
18	Saururus_cernuus|C224730	Saururus_chinensis|scaffold16692	0.1339	8.5509
19	Calycanthus_chinensis|C379197	Calycanthus_occidentalis|scaffold6814	0.3784	4.6742	0.0857
19	Campsis_grandiflora|scaffold17049	Campsis_radicans|scaffold20545	0.0822	3.0412
19	Convallaria_lmajalis|C656734	Convallaria_majalis|C810499	2.1516	3.1878
19	Cornus_alternifolia|C399356	Cornus_controversa|C402948	0.1214	3.2374
19	Cornus_ellipica|C540832	Cornus_florida|C392558	0.3444	10.6664
19	Croomia_japonica|C843096	Croomia_paueiflora|scaffold15937	0.2988	8.968
19	Dysosma_pleiantha|C721980	Dysosma_versipellis|C754744	1.3732	2.5943
19	Gelsemium_elegans|C205575	Gelsemium_sempervirens|scaffold10961	0.34	8.9985
19	Hamamelis_japonica|C377122	Hamamelis_vernalis|C321752	0.4795	5.5288
19	Liquidambar_styraciflua|C430253	Liquidambar_formosana|scaffold14779	0.1018	3.6581
19	Meehania_cordata|scaffold4522	Meehania_fargesii|scaffold6686	0.1914	4.4223
19	Menispermum_canadense|C304979	Menispermum_dauricum|C357953	0.1945	5.089
19	Nelumbo_lutea|C250363	Nelumbo_nucifera|scaffold11806	1.4473	3.3116
19	Penthorum_chinense|C209878	Penthorum_sedoides|C213393	0.1935	2.8522
19	Saururus_cernuus|C223162	Saururus_chinensis|C258263	0.3712	8.5509
20	Calycanthus_chinensis|C381418	Calycanthus_occidentalis|C377382	0.2079	4.6742	0.0065
20	Cornus_alternifolia|scaffold16023	Cornus_controversa|C391014	0.2516	3.2374
20	Cornus_ellipica|C524838	Cornus_florida|C378668	0.2464	10.6664
20	Cotinus_coggygria|C377797	Cotinus_obovatus|C349698	0.1395	1.893
20	Croomia_japonica|scaffold30512	Croomia_paueiflora|C457100	0.4546	8.968
20	Dysosma_pleiantha|scaffold21185	Dysosma_versipellis|scaffold24697	0.1447	2.5943
20	Gelsemium_elegans|C194768	Gelsemium_sempervirens|scaffold12907	0.1844	8.9985
20	Hamamelis_japonica|C359614	Hamamelis_vernalis|C305535	0.2257	5.5288
20	Liquidambar_styraciflua|C419024	Liquidambar_formosana|C648812	0.5658	3.6581
20	Liriodendron_chinense|scaffold33047	Liriodendron_tulipifera|C432959	0.7427	1.6912
20	Nelumbo_lutea|C229785	Nelumbo_nucifera|C269248	0.4186	3.3116
20	Penthorum_chinense|scaffold8899	Penthorum_sedoides|C194127	0.143	2.8522
20	Phryma_Aleptostachya|C477550	Phryma_leptostachya|C342169	0.1719	3.5623
20	Sassafras_albidum|scaffold19903	Sassafras_tzumu|C381334	0.2904	3.6748
20	Saururus_cernuus|scaffold12513	Saururus_chinensis|C262214	0.3317	8.5509
21	Campsis_grandiflora|C496135	Campsis_radicans|scaffold7461	0.086	3.0412	0.0155
21	Convallaria_lmajalis|scaffold32835	Convallaria_majalis|C806847	0.2047	3.1878
21	Cornus_ellipica|C537164	Cornus_florida|C390360	0.2911	10.6664
21	Cotinus_coggygria|C378203	Cotinus_obovatus|C343998	0.6344	1.893
21	Croomia_japonica|scaffold29429	Croomia_paueiflora|C465042	0.0846	8.968
21	Dysosma_pleiantha|C721590	Dysosma_versipellis|scaffold26564	0.5519	2.5943
21	Hamamelis_japonica|C374954	Hamamelis_vernalis|C321668	0.0762	5.5288
21	Liquidambar_styraciflua|C427712	Liquidambar_formosana|scaffold6866	0.1588	3.6581
21	Liriodendron_chinense|scaffold24323	Liriodendron_tulipifera|C437773	0.0254	1.6912
21	Meehania_cordata|scaffold10678	Meehania_fargesii|C365380	0.1326	4.4223
21	Nelumbo_lutea|C246817	Nelumbo_nucifera|scaffold11184	0.1826	3.3116
21	Phryma_Aleptostachya|C480406	Phryma_leptostachya|C352225	0.147	3.5623
21	Sassafras_albidum|scaffold16378	Sassafras_tzumu|C399854	0.1192	3.6748
21	Saururus_cernuus|C223852	Saururus_chinensis|C254911	0.2677	8.5509
22	Calycanthus_chinensis|C357601	Calycanthus_occidentalis|C348013	0.1622	4.6742	0.0106
22	Cornus_alternifolia|C379526	Cornus_controversa|C389039	0.1879	3.2374
22	Cornus_ellipica|C515641	Cornus_florida|scaffold13900	0.0755	10.6664
22	Croomia_japonica|scaffold33143	Croomia_paueiflora|C452172	0.099	8.968
22	Gelsemium_elegans|C195904	Gelsemium_sempervirens|C247501	0.2239	8.9985
22	Hamamelis_japonica|C362742	Hamamelis_vernalis|C298697	0.1199	5.5288
22	Liquidambar_styraciflua|C416127	Liquidambar_formosana|C649732	0.0884	3.6581
22	Nelumbo_lutea|C224011	Nelumbo_nucifera|scaffold16337	0.2707	3.3116
22	Penthorum_chinense|scaffold8877	Penthorum_sedoides|C193791	0.1226	2.8522
22	Phryma_Aleptostachya|C468041	Phryma_leptostachya|C340523	0.4078	3.5623
22	Saururus_cernuus|C211665	Saururus_chinensis|C252547	0.4073	8.5509
23	Calycanthus_chinensis|C391608	Calycanthus_occidentalis|scaffold19759	0.0331	4.6742	0.0238
23	Convallaria_lmajalis|scaffold35458	Convallaria_majalis|scaffold20265	0.0967	3.1878
23	Cornus_alternifolia|scaffold14342	Cornus_controversa|scaffold18808	0.1285	3.2374
23	Cotinus_coggygria|C375677	Cotinus_obovatus|C353210	0.1962	1.893
23	Croomia_japonica|C850630	Croomia_paueiflora|C469419	0.1628	8.968
23	Gelsemium_elegans|scaffold2058	Gelsemium_sempervirens|scaffold15504	0.0453	8.9985
23	Hamamelis_japonica|C381404	Hamamelis_vernalis|scaffold18874	0.0296	5.5288
23	Liriodendron_chinense|scaffold37167	Liriodendron_tulipifera|C445341	0.0312	1.6912
23	Meehania_cordata|C256687	Meehania_fargesii|scaffold9974	0.0355	4.4223
23	Penthorum_chinense|C212408	Penthorum_sedoides|C209915	0.09	2.8522
23	Phryma_Aleptostachya|C493214	Phryma_leptostachya|C364341	0.0676	3.5623
23	Sassafras_albidum|scaffold20477	Sassafras_tzumu|scaffold3388	0.0991	3.6748
23	Saururus_cernuus|C229520	Saururus_chinensis|C267418	0.0453	8.5509
24	Cornus_alternifolia|scaffold22656	Cornus_controversa|C405466	0.0309	3.2374	0.2929
24	Cornus_ellipica|C546990	Cornus_florida|scaffold19650	0.0243	10.6664
24	Croomia_japonica|C855524	Croomia_paueiflora|C474351	0.0373	8.968
24	Dysosma_pleiantha|C730668	Dysosma_versipellis|C762756	0.0682	2.5943
24	Gelsemium_elegans|C215399	Gelsemium_sempervirens|C263140	0.024	8.9985
24	Hamamelis_japonica|C381848	Hamamelis_vernalis|scaffold4665	0.065	5.5288
24	Liriodendron_chinense|scaffold41977	Liriodendron_tulipifera|C444347	0.0811	1.6912
24	Meehania_cordata|C258739	Meehania_fargesii|scaffold18396	0.0122	4.4223
24	Nelumbo_lutea|C254967	Nelumbo_nucifera|C285330	0.144	3.3116
24	Saururus_cernuus|scaffold12529	Saururus_chinensis|scaffold4299	0.0338	8.5509
25	Calycanthus_chinensis|C392410	Calycanthus_occidentalis|C385222	0.1439	4.6742	0.1069
25	Campsis_grandiflora|scaffold12027	Campsis_radicans|C364118	0.7948	3.0412
25	Convallaria_lmajalis|scaffold16788	Convallaria_majalis|scaffold44739	0.3788	3.1878
25	Cornus_alternifolia|C405350	Cornus_controversa|scaffold21355	0.2522	3.2374
25	Cornus_ellipica|C547992	Cornus_florida|C401198	0.2078	10.6664
25	Cotinus_coggygria|C376525	Cotinus_obovatus|C353956	0.0595	1.893
25	Croomia_japonica|C856124	Croomia_paueiflora|C475743	0.0628	8.968
25	Dysosma_pleiantha|C730324	Dysosma_versipellis|scaffold20046	1.1637	2.5943
25	Gelsemium_elegans|scaffold6036	Gelsemium_sempervirens|C269876	0.1483	8.9985
25	Hamamelis_japonica|scaffold16289	Hamamelis_vernalis|C328285	0.14	5.5288
25	Liquidambar_styraciflua|scaffold20235	Liquidambar_formosana|scaffold32752	0.205	3.6581
25	Meehania_cordata|C258961	Meehania_fargesii|scaffold10301	0.1124	4.4223
25	Nelumbo_lutea|C256679	Nelumbo_nucifera|C286726	0.3161	3.3116
25	Penthorum_chinense|C222090	Penthorum_sedoides|C212039	0.1707	2.8522
25	Phryma_Aleptostachya|C493458	Phryma_leptostachya|C366465	0.072	3.5623
25	Sassafras_albidum|C474341	Sassafras_tzumu|C408678	0.0575	3.6748
25	Saururus_cernuus|scaffold11253	Saururus_chinensis|C272370	0.1008	8.5509
26	Calycanthus_chinensis|scaffold16553	Calycanthus_occidentalis|C378796	0.1779	4.6742	0.0654
26	Convallaria_lmajalis|scaffold35829	Convallaria_majalis|scaffold45054	0.065	3.1878
26	Cornus_alternifolia|scaffold23098	Cornus_controversa|C401640	0.2701	3.2374
26	Cornus_ellipica|scaffold23745	Cornus_florida|scaffold4590	0.0467	10.6664
26	Cotinus_coggygria|scaffold19387	Cotinus_obovatus|C350120	0.0751	1.893
26	Croomia_japonica|C852176	Croomia_paueiflora|C472913	0.1558	8.968
26	Dysosma_pleiantha|C724430	Dysosma_versipellis|scaffold21413	0.5694	2.5943
26	Gelsemium_elegans|C211664	Gelsemium_sempervirens|C261604	0.1341	8.9985
26	Hamamelis_japonica|C382264	Hamamelis_vernalis|C320328	0.1715	5.5288
26	Liquidambar_styraciflua|C434051	Liquidambar_formosana|C665534	0.0509	3.6581
26	Meehania_cordata|C252871	Meehania_fargesii|C371914	0.0626	4.4223
26	Menispermum_canadense|scaffold38231	Menispermum_dauricum|C677351	0.1331	5.089
26	Nelumbo_lutea|C251081	Nelumbo_nucifera|C282314	0.1497	3.3116
26	Penthorum_chinense|C220368	Penthorum_sedoides|C207384	0.0812	2.8522
26	Phryma_Aleptostachya|C486880	Phryma_leptostachya|C357678	0.0402	3.5623
26	Saururus_cernuus|C229912	Saururus_chinensis|scaffold11584	0.0322	8.5509
27	Calycanthus_chinensis|C375240	Calycanthus_occidentalis|C365137	0.3992	4.6742	0.0499
27	Campsis_grandiflora|scaffold30118	Campsis_radicans|C346942	0.5356	3.0412
27	Convallaria_lmajalis|scaffold16795	Convallaria_majalis|C809087	0.2049	3.1878
27	Cornus_alternifolia|C386298	Cornus_controversa|C390136	0.1962	3.2374
27	Cornus_ellipica|scaffold20745	Cornus_florida|C388798	0.5829	10.6664
27	Cotinus_coggygria|C368617	Cotinus_obovatus|C341554	0.204	1.893
27	Croomia_japonica|C835570	Croomia_paueiflora|C465400	0.3189	8.968
27	Dysosma_pleiantha|scaffold4364	Dysosma_versipellis|scaffold20384	0.1507	2.5943
27	Gelsemium_elegans|scaffold12799	Gelsemium_sempervirens|scaffold275	0.1422	8.9985
27	Hamamelis_japonica|C365406	Hamamelis_vernalis|C312132	0.381	5.5288
27	Liquidambar_styraciflua|C427150	Liquidambar_formosana|C659760	0.3928	3.6581
27	Liriodendron_chinense|scaffold34919	Liriodendron_tulipifera|scaffold18545	0.3234	1.6912
27	Meehania_cordata|C244905	Meehania_fargesii|C361434	0.5606	4.4223
27	Menispermum_canadense|C536281	Menispermum_dauricum|scaffold42870	0.1892	5.089
27	Penthorum_chinense|C203862	Penthorum_sedoides|C197689	0.0658	2.8522
27	Phryma_Aleptostachya|C485186	Phryma_leptostachya|C356778	0.1444	3.5623
27	Sassafras_albidum|C459347	Sassafras_tzumu|C395604	0.1064	3.6748
27	Saururus_cernuus|scaffold13017	Saururus_chinensis|C259453	0.1594	8.5509
28	Calycanthus_chinensis|C358193	Calycanthus_occidentalis|C347567	0.2346	4.6742	0.0001
28	Gelsemium_elegans|C192206	Gelsemium_sempervirens|scaffold4377	0.5677	8.9985
28	Hamamelis_japonica|C359042	Hamamelis_vernalis|scaffold604	0.2074	5.5288
28	Liquidambar_styraciflua|C403645	Liquidambar_formosana|scaffold11756	0.2592	3.6581
28	Penthorum_chinense|C200466	Penthorum_sedoides|C187574	0.0766	2.8522
28	Phryma_Aleptostachya|C472224	Phryma_leptostachya|C359269	0.3419	3.5623
28	Saururus_cernuus|C219628	Saururus_chinensis|C254061	0.2225	8.5509
29	Campsis_grandiflora|scaffold31059	Campsis_radicans|C353486	0.1512	3.0412
29	Convallaria_lmajalis|scaffold34643	Convallaria_majalis|scaffold33352	0.2583	3.1878
29	Cornus_alternifolia|C395610	Cornus_controversa|C397244	0.3014	3.2374
29	Croomia_japonica|C833270	Croomia_paueiflora|scaffold10782	0.2239	8.968
29	Dysosma_pleiantha|scaffold1570	Dysosma_versipellis|scaffold15049	0.0576	2.5943
29	Gelsemium_elegans|C206961	Gelsemium_sempervirens|C259266	0.1571	8.9985
29	Liquidambar_styraciflua|C433621	Liquidambar_formosana|C665562	0.1184	3.6581
29	Liriodendron_chinense|scaffold29534	Liriodendron_tulipifera|C439027	0.8265	1.6912
29	Meehania_cordata|scaffold14759	Meehania_fargesii|scaffold4450	0.0257	4.4223
29	Menispermum_canadense|scaffold38080	Menispermum_dauricum|C670335	0.0715	5.089
29	Penthorum_chinense|scaffold11808	Penthorum_sedoides|C185092	0.1945	2.8522
30	Calycanthus_chinensis|C362766	Calycanthus_occidentalis|C339497	0.062	4.6742	0.1417
30	Convallaria_lmajalis|scaffold31557	Convallaria_majalis|scaffold30691	0.1955	3.1878
30	Cornus_alternifolia|scaffold19166	Cornus_controversa|C370914	0.3685	3.2374
30	Cornus_ellipica|scaffold7397	Cornus_florida|C367376	0.1483	10.6664
30	Croomia_japonica|C765943	Croomia_paueiflora|C424811	0.2047	8.968
30	Hamamelis_japonica|C358652	Hamamelis_vernalis|scaffold9011	0.1904	5.5288
30	Menispermum_canadense|scaffold15712	Menispermum_dauricum|scaffold28494	0.1335	5.089
30	Sassafras_albidum|C438497	Sassafras_tzumu|C380734	0.3503	3.6748
31	Calycanthus_chinensis|C376228	Calycanthus_occidentalis|C366317	0.1948	4.6742	0.0135
31	Campsis_grandiflora|scaffold23158	Campsis_radicans|scaffold19230	0.3185	3.0412
31	Cornus_alternifolia|C380226	Cornus_controversa|C373807	0.1357	3.2374
31	Cornus_ellipica|scaffold29283	Cornus_florida|C368514	0.162	10.6664
31	Croomia_japonica|C815086	Croomia_paueiflora|C454142	0.2714	8.968
31	Gelsemium_elegans|C206349	Gelsemium_sempervirens|scaffold13432	0.4896	8.9985
31	Hamamelis_japonica|C365695	Hamamelis_vernalis|C306753	0.4889	5.5288
31	Liquidambar_styraciflua|C429822	Liquidambar_formosana|scaffold28083	0.3036	3.6581
31	Liriodendron_chinense|scaffold43545	Liriodendron_tulipifera|C421181	0.1856	1.6912
31	Meehania_cordata|C237927	Meehania_fargesii|C357478	0.0965	4.4223
31	Nelumbo_lutea|C243417	Nelumbo_nucifera|scaffold16168	1.7042	3.3116
31	Penthorum_chinense|scaffold8836	Penthorum_sedoides|C194541	0.2166	2.8522
31	Phryma_Aleptostachya|C473414	Phryma_leptostachya|C342667	0.3357	3.5623
31	Sassafras_albidum|C455435	Sassafras_tzumu|C386756	0.5238	3.6748
32	Calycanthus_chinensis|C380726	Calycanthus_occidentalis|C370847	0.3697	4.6742	0.0333
32	Campsis_grandiflora|C487169	Campsis_radicans|scaffold19232	0.622	3.0412
32	Convallaria_lmajalis|C659484	Convallaria_majalis|C808709	0.1254	3.1878
32	Cornus_alternifolia|C399288	Cornus_controversa|C401230	0.1116	3.2374
32	Cornus_ellipica|C533678	Cornus_florida|C393930	0.1528	10.6664
32	Croomia_japonica|scaffold20279	Croomia_paueiflora|C462476	0.1256	8.968
32	Dysosma_pleiantha|scaffold12354	Dysosma_versipellis|C745627	0.403	2.5943
32	Gelsemium_elegans|scaffold12790	Gelsemium_sempervirens|C263262	0.4971	8.9985
32	Hamamelis_japonica|C377140	Hamamelis_vernalis|scaffold16968	0.4222	5.5288
32	Liquidambar_styraciflua|C426344	Liquidambar_formosana|C654666	0.1538	3.6581
32	Liriodendron_chinense|scaffold39383	Liriodendron_tulipifera|C427901	0.2012	1.6912
32	Menispermum_canadense|C538929	Menispermum_dauricum|scaffold22976	0.0365	5.089
32	Penthorum_chinense|C210906	Penthorum_sedoides|C202933	0.4598	2.8522
32	Phryma_Aleptostachya|C484618	Phryma_leptostachya|C353265	0.1682	3.5623
32	Sassafras_albidum|C452823	Sassafras_tzumu|C393246	0.4269	3.6748
32	Saururus_cernuus|C220476	Saururus_chinensis|C256151	0.1356	8.5509
33	Campsis_grandiflora|C451100	Campsis_radicans|scaffold16406	0.4482	3.0412	0.5804
33	Croomia_japonica|scaffold20658	Croomia_paueiflora|C434122	0.087	8.968
33	Dysosma_pleiantha|C703252	Dysosma_versipellis|C722399	0.6184	2.5943
33	Hamamelis_japonica|C335465	Hamamelis_vernalis|C278930	0.2211	5.5288
33	Nelumbo_lutea|C201479	Nelumbo_nucifera|scaffold6538	0.1884	3.3116
33	Sassafras_albidum|C398178	Sassafras_tzumu|C331612	0.4821	3.6748
34	Calycanthus_chinensis|C379353	Calycanthus_occidentalis|C370253	0.1838	4.6742	0.0454
34	Campsis_grandiflora|scaffold31177	Campsis_radicans|scaffold15952	0.0565	3.0412
34	Cornus_alternifolia|C397366	Cornus_controversa|C398956	0.0986	3.2374
34	Cornus_ellipica|scaffold27753	Cornus_florida|scaffold7779	0.1541	10.6664
34	Cotinus_coggygria|C360033	Cotinus_obovatus|scaffold569	0.6989	1.893
34	Dysosma_pleiantha|C725058	Dysosma_versipellis|C753370	0.4311	2.5943
34	Gelsemium_elegans|C203753	Gelsemium_sempervirens|C256592	0.2478	8.9985
34	Hamamelis_japonica|scaffold17636	Hamamelis_vernalis|C313186	0.2225	5.5288
34	Liquidambar_styraciflua|scaffold21449	Liquidambar_formosana|scaffold29783	0.0472	3.6581
34	Liriodendron_chinense|C815271	Liriodendron_tulipifera|scaffold22462	0.1181	1.6912
34	Meehania_cordata|scaffold9451	Meehania_fargesii|scaffold12599	0.0797	4.4223
34	Nelumbo_lutea|C247129	Nelumbo_nucifera|C277180	1.2026	3.3116
34	Penthorum_chinense|C208374	Penthorum_sedoides|C195897	0.0749	2.8522
34	Phryma_Aleptostachya|C476880	Phryma_leptostachya|C350319	0.2669	3.5623
34	Saururus_cernuus|C228312	Saururus_chinensis|C259225	0.1254	8.5509
35	Calycanthus_chinensis|C356605	Calycanthus_occidentalis|scaffold2635	0.6924	4.6742	0.0618
35	Cotinus_coggygria|C351672	Cotinus_obovatus|scaffold4997	0.7714	1.893
35	Croomia_japonica|scaffold9684	Croomia_paueiflora|C435164	0.7611	8.968
35	Gelsemium_elegans|C189879	Gelsemium_sempervirens|C244109	0.3863	8.9985
35	Hamamelis_japonica|scaffold8402	Hamamelis_vernalis|C300353	0.9747	5.5288
35	Liquidambar_styraciflua|C408477	Liquidambar_formosana|C647252	1.1631	3.6581
35	Meehania_cordata|C238691	Meehania_fargesii|scaffold9635	0.5104	4.4223
35	Menispermum_canadense|C524665	Menispermum_dauricum|C644339	1.8974	5.089
35	Nelumbo_lutea|C221949	Nelumbo_nucifera|C253354	0.9748	3.3116
35	Phryma_Aleptostachya|C465199	Phryma_leptostachya|scaffold6752	1.3228	3.5623
35	Saururus_cernuus|C213581	Saururus_chinensis|C246801	1.0492	8.5509
36	Calycanthus_chinensis|scaffold171	Calycanthus_occidentalis|scaffold2538	0.3556	4.6742	0.301
36	Cornus_ellipica|scaffold22053	Cornus_florida|C369812	0.0626	10.6664
36	Cotinus_coggygria|scaffold726	Cotinus_obovatus|scaffold3404	0.2659	1.893
36	Hamamelis_japonica|scaffold19027	Hamamelis_vernalis|scaffold12036	0.5685	5.5288
36	Liquidambar_styraciflua|C407309	Liquidambar_formosana|scaffold7179	0.3938	3.6581
36	Meehania_cordata|C237705	Meehania_fargesii|C353462	0.3989	4.4223
36	Menispermum_canadense|C531103	Menispermum_dauricum|scaffold23965	0.2969	5.089
36	Nelumbo_lutea|C220777	Nelumbo_nucifera|C260084	0.4053	3.3116
36	Penthorum_chinense|scaffold10154	Penthorum_sedoides|C202123	0.3426	2.8522
36	Phryma_Aleptostachya|scaffold3657	Phryma_leptostachya|scaffold1185	0.7584	3.5623
36	Saururus_cernuus|scaffold12243	Saururus_chinensis|scaffold16022	0.1767	8.5509
37	Calycanthus_chinensis|scaffold10278	Calycanthus_occidentalis|scaffold15093	0.0879	4.6742	0.0262
37	Campsis_grandiflora|scaffold25553	Campsis_radicans|C360198	0.0855	3.0412
37	Cornus_ellipica|scaffold21502	Cornus_florida|C396076	0.0854	10.6664
37	Cotinus_coggygria|scaffold16147	Cotinus_obovatus|C350852	0.1135	1.893
37	Croomia_japonica|C839772	Croomia_paueiflora|C462532	0.1168	8.968
37	Dysosma_pleiantha|scaffold10659	Dysosma_versipellis|scaffold27447	0.3822	2.5943
37	Gelsemium_elegans|C211156	Gelsemium_sempervirens|C261944	0.1608	8.9985
37	Hamamelis_japonica|C373104	Hamamelis_vernalis|C322202	0.6212	5.5288
37	Liquidambar_styraciflua|C437883	Liquidambar_formosana|scaffold31113	0.0746	3.6581
37	Meehania_cordata|C253901	Meehania_fargesii|C369130	0.0469	4.4223
37	Nelumbo_lutea|C248799	Nelumbo_nucifera|C279570	0.8856	3.3116
37	Penthorum_chinense|C217698	Penthorum_sedoides|C208287	0.1489	2.8522
37	Phryma_Aleptostachya|C490040	Phryma_leptostachya|C360085	0.1125	3.5623
37	Sassafras_albidum|C473111	Sassafras_tzumu|C405644	0.0728	3.6748
37	Saururus_cernuus|scaffold11935	Saururus_chinensis|scaffold17072	0.1479	8.5509
38	Cornus_alternifolia|C379168	Cornus_controversa|C377983	0.1385	3.2374	0.0366
38	Cotinus_coggygria|C364819	Cotinus_obovatus|C338073	0.1897	1.893
38	Croomia_japonica|C821912	Croomia_paueiflora|scaffold17609	0.2574	8.968
38	Gelsemium_elegans|C201875	Gelsemium_sempervirens|scaffold3332	0.1689	8.9985
38	Liquidambar_styraciflua|C422880	Liquidambar_formosana|scaffold30821	0.2385	3.6581
38	Menispermum_canadense|C528555	Menispermum_dauricum|C675613	0.3969	5.089
38	Nelumbo_lutea|C230209	Nelumbo_nucifera|C265210	0.4172	3.3116
38	Sassafras_albidum|scaffold5652	Sassafras_tzumu|C374624	0.0827	3.6748
38	Saururus_cernuus|scaffold12775	Saururus_chinensis|C245027	0.0595	8.5509
39	Calycanthus_chinensis|C371188	Calycanthus_occidentalis|C361747	0.4619	4.6742	0.0001
39	Campsis_grandiflora|scaffold14036	Campsis_radicans|scaffold14255	0.0524	3.0412
39	Convallaria_lmajalis|C652964	Convallaria_majalis|C803091	0.0865	3.1878
39	Cornus_alternifolia|C386720	Cornus_controversa|C388249	0.1303	3.2374
39	Cornus_ellipica|C526314	Cornus_florida|C383274	0.1934	10.6664
39	Croomia_japonica|C835890	Croomia_paueiflora|C260785	0.0242	8.968
39	Dysosma_pleiantha|C713098	Dysosma_versipellis|C746647	0.3478	2.5943
39	Gelsemium_elegans|C201381	Gelsemium_sempervirens|scaffold8659	0.2966	8.9985
39	Hamamelis_japonica|C363768	Hamamelis_vernalis|scaffold10947	0.1364	5.5288
39	Liquidambar_styraciflua|C419034	Liquidambar_formosana|scaffold23382	0.1919	3.6581
39	Meehania_cordata|C245909	Meehania_fargesii|scaffold821	0.1693	4.4223
39	Menispermum_canadense|C533539	Menispermum_dauricum|scaffold9588	0.2696	5.089
39	Nelumbo_lutea|C236339	Nelumbo_nucifera|C267004	0.2727	3.3116
39	Phryma_Aleptostachya|C478654	Phryma_leptostachya|C349919	0.0986	3.5623
39	Sassafras_albidum|scaffold10505	Sassafras_tzumu|C389412	0.1188	3.6748
40	Calycanthus_chinensis|C374352	Calycanthus_occidentalis|scaffold10339	0.2765	4.6742	0.0365
40	Campsis_grandiflora|C491469	Campsis_radicans|scaffold22440	0.4186	3.0412
40	Cornus_alternifolia|C389348	Cornus_controversa|scaffold12210	0.1346	3.2374
40	Cornus_ellipica|scaffold15366	Cornus_florida|C375924	0.1806	10.6664
40	Croomia_japonica|C796738	Croomia_paueiflora|C440578	0.1774	8.968
40	Dysosma_pleiantha|C704570	Dysosma_versipellis|C731625	0.6432	2.5943
40	Gelsemium_elegans|C198560	Gelsemium_sempervirens|C234579	0.7852	8.9985
40	Liquidambar_styraciflua|scaffold9926	Liquidambar_formosana|C653766	0.3604	3.6581
40	Liriodendron_chinense|C814753	Liriodendron_tulipifera|C434082	0.1682	1.6912
40	Meehania_cordata|C244723	Meehania_fargesii|C363466	0.1501	4.4223
40	Menispermum_canadense|scaffold27068	Menispermum_dauricum|scaffold40145	1.3251	5.089
40	Nelumbo_lutea|scaffold12426	Nelumbo_nucifera|C268362	2.437	3.3116
40	Phryma_Aleptostachya|C473570	Phryma_leptostachya|C349797	0.8244	3.5623
40	Sassafras_albidum|C457275	Sassafras_tzumu|C393634	0.7529	3.6748
40	Saururus_cernuus|C215952	Saururus_chinensis|C252039	0.3553	8.5509
41	Calycanthus_chinensis|C382618	Calycanthus_occidentalis|C374750	0.2596	4.6742	0.0007
41	Cornus_alternifolia|scaffold22003	Cornus_controversa|scaffold15579	0.1888	3.2374
41	Cornus_ellipica|scaffold9710	Cornus_florida|C391104	0.4199	10.6664
41	Cotinus_coggygria|C373163	Cotinus_obovatus|C352080	0.765	1.893
41	Croomia_japonica|C840042	Croomia_paueiflora|C476387	0.4424	8.968
41	Dysosma_pleiantha|C718738	Dysosma_versipellis|C743305	0.0684	2.5943
41	Hamamelis_japonica|scaffold20636	Hamamelis_vernalis|scaffold18199	0.162	5.5288
41	Liquidambar_styraciflua|scaffold18656	Liquidambar_formosana|C656906	0.332	3.6581
41	Liriodendron_chinense|scaffold12776	Liriodendron_tulipifera|scaffold13185	0.8933	1.6912
41	Meehania_cordata|C251175	Meehania_fargesii|scaffold10598	1.0395	4.4223
41	Menispermum_canadense|scaffold28145	Menispermum_dauricum|scaffold36263	0.1721	5.089
41	Nelumbo_lutea|C247161	Nelumbo_nucifera|C281430	0.1956	3.3116
41	Penthorum_chinense|C214992	Penthorum_sedoides|C210085	0.1163	2.8522
41	Phryma_Aleptostachya|C484470	Phryma_leptostachya|C354427	0.5842	3.5623
41	Sassafras_albidum|C463859	Sassafras_tzumu|C396114	0.132	3.6748
41	Saururus_cernuus|scaffold13145	Saururus_chinensis|C255775	0.6658	8.5509
42	Calycanthus_chinensis|C386040	Calycanthus_occidentalis|C374920	0.0687	4.6742	0.0869
42	Cotinus_coggygria|C369687	Cotinus_obovatus|C346428	0.8813	1.893
42	Dysosma_pleiantha|C727468	Dysosma_versipellis|C759700	0.1376	2.5943
42	Gelsemium_elegans|scaffold6694	Gelsemium_sempervirens|scaffold15513	0.2067	8.9985
42	Hamamelis_japonica|scaffold17480	Hamamelis_vernalis|C318002	0.0523	5.5288
42	Liquidambar_styraciflua|scaffold17202	Liquidambar_formosana|scaffold30552	0.0302	3.6581
42	Meehania_cordata|C250919	Meehania_fargesii|scaffold18487	0.1063	4.4223
42	Penthorum_chinense|C209938	Penthorum_sedoides|C202109	0.1158	2.8522
42	Phryma_Aleptostachya|C483178	Phryma_leptostachya|C355754	0.0751	3.5623
42	Sassafras_albidum|scaffold22451	Sassafras_tzumu|C402320	0.0333	3.6748
43	Calycanthus_chinensis|C380870	Calycanthus_occidentalis|C376412	0.2168	4.6742	0.0002
43	Campsis_grandiflora|C489343	Campsis_radicans|scaffold18282	0.1843	3.0412
43	Convallaria_lmajalis|C645852	Convallaria_majalis|scaffold26059	0.1054	3.1878
43	Cornus_alternifolia|C394590	Cornus_controversa|C400756	0.1781	3.2374
43	Cornus_ellipica|C531376	Cornus_florida|C387276	0.1515	10.6664
43	Cotinus_coggygria|C367721	Cotinus_obovatus|C343708	0.2069	1.893
43	Croomia_japonica|scaffold34472	Croomia_paueiflora|scaffold7967	0.2181	8.968
43	Dysosma_pleiantha|scaffold27827	Dysosma_versipellis|scaffold21335	0.2957	2.5943
43	Gelsemium_elegans|C206127	Gelsemium_sempervirens|scaffold1938	0.2034	8.9985
43	Hamamelis_japonica|C379116	Hamamelis_vernalis|C316072	0.4166	5.5288
43	Liquidambar_styraciflua|C429302	Liquidambar_formosana|C662538	0.1264	3.6581
43	Meehania_cordata|C249617	Meehania_fargesii|scaffold12998	0.3977	4.4223
43	Nelumbo_lutea|C242779	Nelumbo_nucifera|C278600	0.0782	3.3116
43	Penthorum_chinense|C208982	Penthorum_sedoides|C201233	0.3499	2.8522
43	Phryma_Aleptostachya|C482440	Phryma_leptostachya|C350595	0.1755	3.5623
43	Sassafras_albidum|scaffold14503	Sassafras_tzumu|C400982	0.1475	3.6748
43	Saururus_cernuus|C226538	Saururus_chinensis|C258037	0.241	8.5509
44	Calycanthus_chinensis|C378993	Calycanthus_occidentalis|scaffold12424	0.1761	4.6742	0.0082
44	Campsis_grandiflora|scaffold32345	Campsis_radicans|C351622	0.1319	3.0412
44	Convallaria_lmajalis|C248665	Convallaria_majalis|scaffold5966	1.0078	3.1878
44	Cornus_ellipica|scaffold25063	Cornus_florida|C385830	0.1601	10.6664
44	Cotinus_coggygria|scaffold13623	Cotinus_obovatus|C343162	0.2024	1.893
44	Croomia_japonica|scaffold37194	Croomia_paueiflora|C466506	0.2659	8.968
44	Gelsemium_elegans|C202893	Gelsemium_sempervirens|C253316	0.105	8.9985
44	Hamamelis_japonica|C370760	Hamamelis_vernalis|scaffold10819	0.0692	5.5288
44	Liquidambar_styraciflua|C430317	Liquidambar_formosana|scaffold21642	0.0422	3.6581
44	Liriodendron_chinense|scaffold37686	Liriodendron_tulipifera|scaffold9409	0.0758	1.6912
44	Meehania_cordata|C249209	Meehania_fargesii|C363894	0.0351	4.4223
44	Menispermum_canadense|scaffold18122	Menispermum_dauricum|scaffold34449	0.2504	5.089
44	Nelumbo_lutea|scaffold5529	Nelumbo_nucifera|C274870	0.8249	3.3116
44	Penthorum_chinense|C214264	Penthorum_sedoides|C201629	0.1244	2.8522
44	Phryma_Aleptostachya|C479294	Phryma_leptostachya|C352713	0.2074	3.5623
44	Sassafras_albidum|C465713	Sassafras_tzumu|C399342	0.1021	3.6748
44	Saururus_cernuus|scaffold13571	Saururus_chinensis|C262588	0.39	8.5509
45	Calycanthus_chinensis|C378833	Calycanthus_occidentalis|scaffold18718	0.1885	4.6742	0.0292
45	Cornus_ellipica|C537926	Cornus_florida|C371680	0.4917	10.6664
45	Croomia_japonica|C845370	Croomia_paueiflora|scaffold18927	0.2668	8.968
45	Dysosma_pleiantha|C717606	Dysosma_versipellis|C751936	0.5008	2.5943
45	Gelsemium_elegans|C212032	Gelsemium_sempervirens|scaffold8145	0.4063	8.9985
45	Hamamelis_japonica|scaffold17110	Hamamelis_vernalis|C318532	0.3692	5.5288
45	Liquidambar_styraciflua|C423074	Liquidambar_formosana|C655002	0.3277	3.6581
45	Meehania_cordata|C252931	Meehania_fargesii|scaffold15125	0.2184	4.4223
45	Nelumbo_lutea|C243931	Nelumbo_nucifera|C269298	0.6554	3.3116
45	Penthorum_chinense|C211562	Penthorum_sedoides|C201593	0.1887	2.8522
45	Phryma_Aleptostachya|scaffold18209	Phryma_leptostachya|C363801	0.1773	3.5623
45	Sassafras_albidum|C459329	Sassafras_tzumu|C314012	0.231	3.6748
45	Saururus_cernuus|C222876	Saururus_chinensis|scaffold3822	0.3523	8.5509
46	Calycanthus_chinensis|C382022	Calycanthus_occidentalis|C373110	0.2019	4.6742	0.0204
46	Campsis_grandiflora|scaffold1994	Campsis_radicans|scaffold22921	0.3335	3.0412
46	Convallaria_lmajalis|C650950	Convallaria_majalis|scaffold44351	3.8707	3.1878
46	Cornus_alternifolia|scaffold6023	Cornus_controversa|C395596	0.2162	3.2374
46	Cornus_ellipica|scaffold17015	Cornus_florida|C389726	0.2133	10.6664
46	Cotinus_coggygria|C367713	Cotinus_obovatus|C340666	0.2854	1.893
46	Croomia_japonica|scaffold26821	Croomia_paueiflora|C462816	0.626	8.968
46	Dysosma_pleiantha|C719696	Dysosma_versipellis|scaffold21042	0.3653	2.5943
46	Gelsemium_elegans|C204193	Gelsemium_sempervirens|C255452	0.3071	8.9985
46	Hamamelis_japonica|C370982	Hamamelis_vernalis|C310868	0.4618	5.5288
46	Liquidambar_styraciflua|C429224	Liquidambar_formosana|C654896	0.4823	3.6581
46	Liriodendron_chinense|scaffold35987	Liriodendron_tulipifera|scaffold16275	0.3861	1.6912
46	Meehania_cordata|scaffold15223	Meehania_fargesii|C353990	0.1755	4.4223
46	Nelumbo_lutea|C245417	Nelumbo_nucifera|C281490	1.0634	3.3116
46	Penthorum_chinense|C212534	Penthorum_sedoides|C201071	0.3741	2.8522
46	Phryma_Aleptostachya|C481446	Phryma_leptostachya|C355880	0.3566	3.5623
47	Calycanthus_chinensis|C384134	Calycanthus_occidentalis|scaffold11977	0.1126	4.6742	0.0141
47	Cornus_alternifolia|scaffold23389	Cornus_controversa|C401040	0.1497	3.2374
47	Cornus_ellipica|C540356	Cornus_florida|C394932	0.3826	10.6664
47	Cotinus_coggygria|C376163	Cotinus_obovatus|C348274	0.7123	1.893
47	Croomia_japonica|scaffold37581	Croomia_paueiflora|scaffold13621	0.0731	8.968
47	Dysosma_pleiantha|C722894	Dysosma_versipellis|scaffold28646	0.1245	2.5943
47	Hamamelis_japonica|C375576	Hamamelis_vernalis|C317760	0.1697	5.5288
47	Meehania_cordata|C244381	Meehania_fargesii|scaffold14784	0.1066	4.4223
47	Nelumbo_lutea|C248559	Nelumbo_nucifera|scaffold5961	0.209	3.3116
47	Phryma_Aleptostachya|C486830	Phryma_leptostachya|C357616	0.1451	3.5623
47	Sassafras_albidum|scaffold5790	Sassafras_tzumu|C400252	0.0359	3.6748
47	Saururus_cernuus|scaffold9282	Saururus_chinensis|C263272	0.1343	8.5509
48	Calycanthus_chinensis|C370886	Calycanthus_occidentalis|C369879	0.0719	4.6742	0.0495
48	Cornus_alternifolia|C397874	Cornus_controversa|scaffold18092	0.4055	3.2374
48	Cotinus_coggygria|C361883	Cotinus_obovatus|C348262	0.2128	1.893
48	Gelsemium_elegans|C211464	Gelsemium_sempervirens|C257538	0.1605	8.9985
48	Hamamelis_japonica|C358578	Hamamelis_vernalis|C284433	0.0617	5.5288
48	Liquidambar_styraciflua|C432749	Liquidambar_formosana|C668382	0.174	3.6581
48	Meehania_cordata|C243747	Meehania_fargesii|scaffold3762	0.0504	4.4223
48	Phryma_Aleptostachya|C475526	Phryma_leptostachya|C349591	0.062	3.5623
48	Sassafras_albidum|scaffold8174	Sassafras_tzumu|C400148	0.0661	3.6748
49	Calycanthus_chinensis|scaffold6134	Calycanthus_occidentalis|scaffold16822
49	Campsis_grandiflora|C491381	Campsis_radicans|C358182
49	Cornus_alternifolia|C382708	Cornus_controversa|C391212
49	Cornus_ellipica|C527862	Cornus_florida|C333441
49	Croomia_japonica|scaffold24766	Croomia_paueiflora|C475633
49	Dysosma_pleiantha|C720480	Dysosma_versipellis|C756360
49	Gelsemium_elegans|C208143	Gelsemium_sempervirens|C257596
49	Liquidambar_styraciflua|C415005	Liquidambar_formosana|scaffold27246
49	Meehania_cordata|C238127	Meehania_fargesii|C365650
49	Menispermum_canadense|C520015	Menispermum_dauricum|scaffold34329
49	Nelumbo_lutea|C236113	Nelumbo_nucifera|C277280
49	Penthorum_chinense|C215356	Penthorum_sedoides|C192543
49	Phryma_Aleptostachya|C491702	Phryma_leptostachya|scaffold17894
49	Sassafras_albidum|scaffold2457	Sassafras_tzumu|scaffold14994
49	Saururus_cernuus|scaffold13529	Saururus_chinensis|scaffold17401
50	Calycanthus_chinensis|C385070	Calycanthus_occidentalis|scaffold21129	0.7518	4.6742	0.0001
50	Convallaria_lmajalis|scaffold33103	Convallaria_majalis|scaffold42199	0.2924	3.1878
50	Cornus_alternifolia|C395456	Cornus_controversa|C400414	0.119	3.2374
50	Cornus_ellipica|scaffold26491	Cornus_florida|C393180	0.122	10.6664
50	Croomia_japonica|scaffold34206	Croomia_paueiflora|C462608	0.2418	8.968
50	Dysosma_pleiantha|scaffold22832	Dysosma_versipellis|C759180	0.0796	2.5943
50	Gelsemium_elegans|C207327	Gelsemium_sempervirens|C260832	0.5086	8.9985
50	Hamamelis_japonica|C379748	Hamamelis_vernalis|C318550	1.2174	5.5288
50	Liquidambar_styraciflua|C431853	Liquidambar_formosana|C663204	0.1146	3.6581
50	Meehania_cordata|C254649	Meehania_fargesii|C368664	0.0845	4.4223
50	Menispermum_canadense|scaffold21863	Menispermum_dauricum|scaffold8854	0.7507	5.089
50	Penthorum_chinense|C214802	Penthorum_sedoides|C204317	0.1709	2.8522
50	Phryma_Aleptostachya|C485338	Phryma_leptostachya|C356816	0.2861	3.5623
50	Sassafras_albidum|scaffold23717	Sassafras_tzumu|C402938	0.444	3.6748
50	Saururus_cernuus|C224226	Saururus_chinensis|C261256	0.0744	8.5509
51	Calycanthus_chinensis|C382228	Calycanthus_occidentalis|C377010	0.1642	4.6742	0.0461
51	Convallaria_lmajalis|C660244	Convallaria_majalis|C808563	1.6222	3.1878
51	Cornus_alternifolia|scaffold20492	Cornus_controversa|C401060	0.3649	3.2374
51	Cornus_ellipica|scaffold29489	Cornus_florida|C398190	0.1369	10.6664
51	Cotinus_coggygria|scaffold12755	Cotinus_obovatus|scaffold6862	0.0857	1.893
51	Croomia_japonica|scaffold34879	Croomia_paueiflora|scaffold17922	0.3538	8.968
51	Dysosma_pleiantha|C727546	Dysosma_versipellis|scaffold20727	0.5264	2.5943
51	Gelsemium_elegans|C211360	Gelsemium_sempervirens|C261198	0.15	8.9985
51	Hamamelis_japonica|C377554	Hamamelis_vernalis|C319906	0.2243	5.5288
51	Liquidambar_styraciflua|scaffold19979	Liquidambar_formosana|scaffold24227	0.1339	3.6581
51	Liriodendron_chinense|C815725	Liriodendron_tulipifera|C434546	0.1987	1.6912
51	Meehania_cordata|C252245	Meehania_fargesii|scaffold13583	0.1053	4.4223
51	Menispermum_canadense|C541345	Menispermum_dauricum|C672905	0.092	5.089
51	Nelumbo_lutea|C250605	Nelumbo_nucifera|scaffold5809	0.324	3.3116
51	Penthorum_chinense|C216376	Penthorum_sedoides|C205357	0.4282	2.8522
51	Phryma_Aleptostachya|C487444	Phryma_leptostachya|C358064	0.114	3.5623
51	Sassafras_albidum|C463071	Sassafras_tzumu|scaffold20637	0.2248	3.6748
51	Saururus_cernuus|C229984	Saururus_chinensis|C264944	0.1683	8.5509
52	Calycanthus_chinensis|C383878	Calycanthus_occidentalis|C377942	0.5015	4.6742	0.0009
52	Campsis_grandiflora|scaffold30596	Campsis_radicans|scaffold22021	0.7274	3.0412
52	Cornus_alternifolia|scaffold7643	Cornus_controversa|C397078	0.3099	3.2374
52	Cornus_ellipica|scaffold29856	Cornus_florida|C389792	0.2649	10.6664
52	Croomia_japonica|C846566	Croomia_paueiflora|C467754	0.3203	8.968
52	Dysosma_pleiantha|C721420	Dysosma_versipellis|scaffold25485	0.3348	2.5943
52	Gelsemium_elegans|C207991	Gelsemium_sempervirens|C258298	0.3413	8.9985
52	Hamamelis_japonica|C350808	Hamamelis_vernalis|C321932	0.4853	5.5288
52	Liquidambar_styraciflua|scaffold18999	Liquidambar_formosana|C664930	0.0468	3.6581
52	Nelumbo_lutea|C246931	Nelumbo_nucifera|scaffold16125	0.2237	3.3116
52	Penthorum_chinense|C211014	Penthorum_sedoides|C199685	0.099	2.8522
52	Phryma_Aleptostachya|C492044	Phryma_leptostachya|C361365	0.0918	3.5623
52	Sassafras_albidum|scaffold23933	Sassafras_tzumu|scaffold20523	0.1698	3.6748
52	Saururus_cernuus|scaffold1602	Saururus_chinensis|scaffold14304	0.2069	8.5509
53	Calycanthus_chinensis|C386566	Calycanthus_occidentalis|C380972	0.3466	4.6742	0.0665
53	Campsis_grandiflora|C499557	Campsis_radicans|scaffold22562	0.2866	3.0412
53	Cornus_alternifolia|scaffold21531	Cornus_controversa|C399822	0.206	3.2374
53	Cornus_ellipica|C544668	Cornus_florida|C393764	0.0754	10.6664
53	Croomia_japonica|scaffold32777	Croomia_paueiflora|C472683	0.3504	8.968
53	Dysosma_pleiantha|C726616	Dysosma_versipellis|C761144	0.1434	2.5943
53	Gelsemium_elegans|scaffold7614	Gelsemium_sempervirens|C264332	0.165	8.9985
53	Hamamelis_japonica|scaffold5157	Hamamelis_vernalis|C317462	0.2706	5.5288
53	Liriodendron_chinense|C818843	Liriodendron_tulipifera|scaffold20639	0.4006	1.6912
53	Meehania_cordata|C255333	Meehania_fargesii|scaffold10049	0.1311	4.4223
53	Nelumbo_lutea|C245875	Nelumbo_nucifera|scaffold8164	0.9671	3.3116
53	Penthorum_chinense|C216770	Penthorum_sedoides|C204899	0.1377	2.8522
53	Phryma_Aleptostachya|scaffold16458	Phryma_leptostachya|C359293	0.0901	3.5623
53	Sassafras_albidum|C468827	Sassafras_tzumu|scaffold16742	0.1721	3.6748
53	Saururus_cernuus|scaffold9725	Saururus_chinensis|C268190	0.1087	8.5509
54	Calycanthus_chinensis|C390545	Calycanthus_occidentalis|C382578	0.1222	4.6742	0.0205
54	Cornus_ellipica|scaffold29983	Cornus_florida|scaffold11580	0.5854	10.6664
54	Dysosma_pleiantha|C727316	Dysosma_versipellis|C759812	0.061	2.5943
54	Gelsemium_elegans|scaffold2057	Gelsemium_sempervirens|C267840	0.3476	8.9985
54	Hamamelis_japonica|C379272	Hamamelis_vernalis|scaffold18491	0.5102	5.5288
54	Liquidambar_styraciflua|C436739	Liquidambar_formosana|scaffold30793	0.576	3.6581
54	Liriodendron_chinense|scaffold32200	Liriodendron_tulipifera|C442059	0.1849	1.6912
54	Meehania_cordata|C258347	Meehania_fargesii|C373108	0.4044	4.4223
54	Menispermum_canadense|scaffold38277	Menispermum_dauricum|scaffold9147	0.0242	5.089
54	Nelumbo_lutea|C250793	Nelumbo_nucifera|C282290	0.3201	3.3116
54	Phryma_Aleptostachya|C491296	Phryma_leptostachya|C361621	0.3779	3.5623
54	Sassafras_albidum|scaffold18371	Sassafras_tzumu|C401652	0.8638	3.6748
54	Saururus_cernuus|scaffold7147	Saururus_chinensis|scaffold12905	0.1874	8.5509
55	Calycanthus_chinensis|C389087	Calycanthus_occidentalis|C378100	0.1905	4.6742	0.0514
55	Cornus_alternifolia|C397128	Cornus_controversa|C398448	0.0914	3.2374
55	Cornus_ellipica|scaffold20037	Cornus_florida|C388130	0.0369	10.6664
55	Cotinus_coggygria|C374255	Cotinus_obovatus|C344960	0.1954	1.893
55	Croomia_japonica|scaffold36255	Croomia_paueiflora|C465292	0.1251	8.968
55	Dysosma_pleiantha|scaffold22643	Dysosma_versipellis|C749010	0.0933	2.5943
55	Gelsemium_elegans|scaffold11826	Gelsemium_sempervirens|C258880	0.1277	8.9985
55	Hamamelis_japonica|C377368	Hamamelis_vernalis|C315712	0.1327	5.5288
55	Liquidambar_styraciflua|scaffold20146	Liquidambar_formosana|scaffold32223	0.2098	3.6581
55	Liriodendron_chinense|C814619	Liriodendron_tulipifera|C433385	0.1667	1.6912
55	Meehania_cordata|scaffold14870	Meehania_fargesii|scaffold12540	0.3369	4.4223
55	Menispermum_canadense|C540743	Menispermum_dauricum|scaffold40237	0.2184	5.089
55	Penthorum_chinense|C212734	Penthorum_sedoides|C202011	0.1975	2.8522
55	Phryma_Aleptostachya|scaffold7779	Phryma_leptostachya|C354511	0.3951	3.5623
55	Sassafras_albidum|scaffold21892	Sassafras_tzumu|C399268	0.1349	3.6748
55	Saururus_cernuus|C230836	Saururus_chinensis|scaffold17204	0.2992	8.5509
56	Calycanthus_chinensis|C387824	Calycanthus_occidentalis|C379374	1.0093	4.6742	0.0487
56	Campsis_grandiflora|scaffold25150	Campsis_radicans|C360364	0.2394	3.0412
56	Cornus_alternifolia|C402526	Cornus_controversa|C404412	0.7155	3.2374
56	Cornus_ellipica|C541632	Cornus_florida|scaffold15712	0.1403	10.6664
56	Cotinus_coggygria|scaffold18560	Cotinus_obovatus|C349146	0.1551	1.893
56	Croomia_japonica|scaffold21259	Croomia_paueiflora|scaffold21156	0.2244	8.968
56	Gelsemium_elegans|C209837	Gelsemium_sempervirens|C263850	0.2844	8.9985
56	Hamamelis_japonica|C377924	Hamamelis_vernalis|C321900	0.0589	5.5288
56	Liquidambar_styraciflua|C435397	Liquidambar_formosana|C665582	0.3402	3.6581
56	Meehania_cordata|C253905	Meehania_fargesii|C370796	0.1968	4.4223
56	Menispermum_canadense|C542241	Menispermum_dauricum|C674619	0.2731	5.089
56	Nelumbo_lutea|C251687	Nelumbo_nucifera|scaffold10485	1.8544	3.3116
56	Penthorum_chinense|C216968	Penthorum_sedoides|C209147	0.0583	2.8522
56	Phryma_Aleptostachya|C487690	Phryma_leptostachya|C358823	0.3441	3.5623
56	Sassafras_albidum|C471939	Sassafras_tzumu|C406798	0.2758	3.6748
57	Calycanthus_chinensis|C386968	Calycanthus_occidentalis|C376254	0.3275	4.6742	0.005
57	Campsis_grandiflora|scaffold32644	Campsis_radicans|scaffold13960	0.2882	3.0412
57	Convallaria_lmajalis|scaffold34073	Convallaria_majalis|C811870	0.9649	3.1878
57	Cornus_alternifolia|C397236	Cornus_controversa|scaffold19032	0.2129	3.2374
57	Cornus_ellipica|C543222	Cornus_florida|C395218	0.5101	10.6664
57	Cotinus_coggygria|scaffold19706	Cotinus_obovatus|scaffold18102	0.6598	1.893
57	Dysosma_pleiantha|scaffold11267	Dysosma_versipellis|C757300	0.1354	2.5943
57	Gelsemium_elegans|C211906	Gelsemium_sempervirens|C258738	0.6193	8.9985
57	Hamamelis_japonica|scaffold13339	Hamamelis_vernalis|C320252	0.3129	5.5288
57	Liquidambar_styraciflua|scaffold14016	Liquidambar_formosana|C663474	0.3245	3.6581
57	Meehania_cordata|scaffold14557	Meehania_fargesii|scaffold6555	0.3237	4.4223
57	Menispermum_canadense|C543199	Menispermum_dauricum|C675927	0.0807	5.089
57	Nelumbo_lutea|C248177	Nelumbo_nucifera|C281718	0.858	3.3116
57	Penthorum_chinense|C214260	Penthorum_sedoides|scaffold1644	0.2862	2.8522
57	Phryma_Aleptostachya|C485380	Phryma_leptostachya|C356132	0.1797	3.5623
57	Sassafras_albidum|scaffold16819	Sassafras_tzumu|C404894	0.6062	3.6748
58	Calycanthus_chinensis|C392408	Calycanthus_occidentalis|C384500	0.0584	4.6742	0.0005
58	Cornus_alternifolia|C404580	Cornus_controversa|scaffold8276	0.177	3.2374
58	Cornus_ellipica|C545276	Cornus_florida|C398686	0.3749	10.6664
58	Cotinus_coggygria|C378829	Cotinus_obovatus|scaffold14721	0.1505	1.893
58	Croomia_japonica|scaffold31339	Croomia_paueiflora|C471147	0.1796	8.968
58	Dysosma_pleiantha|C730162	Dysosma_versipellis|scaffold22603	0.5869	2.5943
58	Hamamelis_japonica|C380914	Hamamelis_vernalis|C325085	0.1354	5.5288
58	Liquidambar_styraciflua|C436809	Liquidambar_formosana|C666808	0.1203	3.6581
58	Liriodendron_chinense|C817343	Liriodendron_tulipifera|C445817	0.173	1.6912
58	Meehania_cordata|scaffold9562	Meehania_fargesii|scaffold18482	0.0453	4.4223
58	Menispermum_canadense|C542779	Menispermum_dauricum|scaffold32451	0.1212	5.089
58	Nelumbo_lutea|scaffold13996	Nelumbo_nucifera|C283974	0.2104	3.3116
58	Penthorum_chinense|C219910	Penthorum_sedoides|scaffold3307	0.2317	2.8522
58	Phryma_Aleptostachya|C494194	Phryma_leptostachya|scaffold17660	0.1417	3.5623
58	Saururus_cernuus|C231820	Saururus_chinensis|C267880	0.0562	8.5509
59	Calycanthus_chinensis|scaffold10754	Calycanthus_occidentalis|C382974	0.1191	4.6742	0.0101
59	Cornus_alternifolia|C403732	Cornus_controversa|scaffold21220	0.9954	3.2374
59	Cornus_ellipica|C538108	Cornus_florida|C383766	0.3428	10.6664
59	Cotinus_coggygria|C363899	Cotinus_obovatus|C356260	0.025	1.893
59	Croomia_japonica|scaffold31741	Croomia_paueiflora|scaffold18578	0.1738	8.968
59	Dysosma_pleiantha|C728804	Dysosma_versipellis|C760592	0.2209	2.5943
59	Gelsemium_elegans|C213992	Gelsemium_sempervirens|C267042	0.1906	8.9985
59	Hamamelis_japonica|scaffold1681	Hamamelis_vernalis|C327907	0.2348	5.5288
59	Liquidambar_styraciflua|scaffold19294	Liquidambar_formosana|scaffold29338	0.0544	3.6581
59	Liriodendron_chinense|scaffold43245	Liriodendron_tulipifera|C442047	0.0759	1.6912
59	Nelumbo_lutea|C251907	Nelumbo_nucifera|C281548	0.554	3.3116
59	Penthorum_chinense|C216130	Penthorum_sedoides|C208807	0.3309	2.8522
59	Phryma_Aleptostachya|C491736	Phryma_leptostachya|C363019	0.2218	3.5623
59	Sassafras_albidum|C339505	Sassafras_tzumu|C315488	0.6772	3.6748
59	Saururus_cernuus|C231964	Saururus_chinensis|C264928	0.1845	8.5509
60	Campsis_grandiflora|scaffold32701	Campsis_radicans|scaffold23548	0.0473	3.0412	0.0001
60	Convallaria_lmajalis|C471236	Convallaria_majalis|C680571	0.4404	3.1878
60	Cornus_ellipica|C548796	Cornus_florida|scaffold19141	0.1836	10.6664
60	Cotinus_coggygria|C377479	Cotinus_obovatus|scaffold19048	0.106	1.893
60	Croomia_japonica|scaffold23642	Croomia_paueiflora|C472883	0.2575	8.968
60	Dysosma_pleiantha|C731132	Dysosma_versipellis|C764938	0.3466	2.5943
60	Gelsemium_elegans|C219278	Gelsemium_sempervirens|scaffold14816	0.2156	8.9985
60	Liriodendron_chinense|C823327	Liriodendron_tulipifera|C447597	0.1506	1.6912
60	Meehania_cordata|scaffold15224	Meehania_fargesii|scaffold18852	0.0544	4.4223
60	Menispermum_canadense|scaffold37692	Menispermum_dauricum|C677691	0.6845	5.089
60	Nelumbo_lutea|C255895	Nelumbo_nucifera|C287640	0.2047	3.3116
60	Phryma_Aleptostachya|scaffold17160	Phryma_leptostachya|scaffold17640	0.1543	3.5623
60	Saururus_cernuus|C233134	Saururus_chinensis|C270228	0.0904	8.5509
61	Campsis_grandiflora|scaffold32302	Campsis_radicans|C362646	0.2092	3.0412	0.1995
61	Convallaria_lmajalis|scaffold34501	Convallaria_majalis|C813514	0.2066	3.1878
61	Cornus_alternifolia|C403640	Cornus_controversa|C406092	0.2102	3.2374
61	Cornus_ellipica|scaffold30825	Cornus_florida|C399756	0.0317	10.6664
61	Cotinus_coggygria|C376295	Cotinus_obovatus|C354904	0.2677	1.893
61	Gelsemium_elegans|C217447	Gelsemium_sempervirens|C266848	0.1763	8.9985
61	Hamamelis_japonica|C380994	Hamamelis_vernalis|scaffold18239	0.2699	5.5288
61	Liquidambar_styraciflua|C437843	Liquidambar_formosana|C670338	0.1415	3.6581
61	Liriodendron_chinense|scaffold35101	Liriodendron_tulipifera|scaffold22655	0.3032	1.6912
61	Menispermum_canadense|C543277	Menispermum_dauricum|scaffold37916	0.0854	5.089
61	Nelumbo_lutea|C252997	Nelumbo_nucifera|scaffold15662	0.3217	3.3116
61	Penthorum_chinense|C218996	Penthorum_sedoides|C208477	0.0929	2.8522
61	Phryma_Aleptostachya|C494548	Phryma_leptostachya|C363987	0.1959	3.5623
61	Sassafras_albidum|C471123	Sassafras_tzumu|C409054	0.193	3.6748
61	Saururus_cernuus|C230534	Saururus_chinensis|C227325	0.2401	8.5509
62	Calycanthus_chinensis|scaffold17500	Calycanthus_occidentalis|C384348	0.0742	4.6742	0.0395
62	Campsis_grandiflora|scaffold4561	Campsis_radicans|C364974	0.3866	3.0412
62	Convallaria_lmajalis|scaffold16898	Convallaria_majalis|scaffold17866	0.1834	3.1878
62	Cornus_ellipica|C546770	Cornus_florida|scaffold19085	0.4506	10.6664
62	Cotinus_coggygria|scaffold6014	Cotinus_obovatus|C358542	0.6653	1.893
62	Croomia_japonica|C852524	Croomia_paueiflora|C471881	0.1869	8.968
62	Dysosma_pleiantha|scaffold27807	Dysosma_versipellis|scaffold23700	0.4311	2.5943
62	Gelsemium_elegans|scaffold2964	Gelsemium_sempervirens|scaffold3368	0.1248	8.9985
62	Hamamelis_japonica|C379936	Hamamelis_vernalis|C327067	0.0783	5.5288
62	Liquidambar_styraciflua|scaffold21386	Liquidambar_formosana|C669882	0.1825	3.6581
62	Meehania_cordata|scaffold12906	Meehania_fargesii|C372410	0.0721	4.4223
62	Menispermum_canadense|C543769	Menispermum_dauricum|C676421	0.0476	5.089
62	Phryma_Aleptostachya|C492880	Phryma_leptostachya|scaffold17540	0.0664	3.5623
62	Sassafras_albidum|scaffold21299	Sassafras_tzumu|C405330	0.1873	3.6748
62	Saururus_cernuus|scaffold13346	Saururus_chinensis|C267462	0.1065	8.5509
63	Calycanthus_chinensis|C367506	Calycanthus_occidentalis|C360365	0.1849	4.6742	0.3124
63	Cornus_ellipica|C534784	Cornus_florida|C278247	0.2128	10.6664
63	Gelsemium_elegans|C198694	Gelsemium_sempervirens|scaffold13828	0.3171	8.9985
63	Liquidambar_styraciflua|scaffold20656	Liquidambar_formosana|C660778	0.438	3.6581
63	Nelumbo_lutea|C242049	Nelumbo_nucifera|C258422	0.3859	3.3116
63	Penthorum_chinense|scaffold6436	Penthorum_sedoides|scaffold4722	0.353	2.8522
63	Phryma_Aleptostachya|C471482	Phryma_leptostachya|C345231	0.3472	3.5623
64	Calycanthus_chinensis|C370760	Calycanthus_occidentalis|scaffold13617	0.2431	4.6742	0.7374
64	Campsis_grandiflora|scaffold26129	Campsis_radicans|scaffold19626	0.1233	3.0412
64	Cornus_ellipica|C518459	Cornus_florida|scaffold18561	0.4445	10.6664
64	Cotinus_coggygria|C364973	Cotinus_obovatus|scaffold17199	0.1238	1.893
64	Gelsemium_elegans|C200589	Gelsemium_sempervirens|scaffold12112	0.2166	8.9985
64	Sassafras_albidum|scaffold23094	Sassafras_tzumu|scaffold15035	0.1287	3.6748
64	Saururus_cernuus|C214129	Saururus_chinensis|C248326	0.2765	8.5509
65	Calycanthus_chinensis|C388212	Calycanthus_occidentalis|C380742	0.2076	4.6742	0.0195
65	Campsis_grandiflora|scaffold25598	Campsis_radicans|C362248	0.368	3.0412
65	Convallaria_lmajalis|scaffold33072	Convallaria_majalis|scaffold44935	0.3208	3.1878
65	Croomia_japonica|C849872	Croomia_paueiflora|C473053	0.3265	8.968
65	Dysosma_pleiantha|scaffold30036	Dysosma_versipellis|scaffold20589	0.1975	2.5943
65	Gelsemium_elegans|C212434	Gelsemium_sempervirens|C266834	0.1823	8.9985
65	Hamamelis_japonica|scaffold6146	Hamamelis_vernalis|C320486	0.0809	5.5288
65	Liquidambar_styraciflua|C435571	Liquidambar_formosana|scaffold28761	0.228	3.6581
65	Liriodendron_chinense|scaffold45251	Liriodendron_tulipifera|scaffold22651	0.2384	1.6912
65	Meehania_cordata|C256313	Meehania_fargesii|C372696	0.2125	4.4223
65	Menispermum_canadense|C542719	Menispermum_dauricum|scaffold43012	0.3094	5.089
65	Nelumbo_lutea|C246667	Nelumbo_nucifera|C278966	1.1412	3.3116
65	Penthorum_chinense|C214438	Penthorum_sedoides|C205555	0.0993	2.8522
65	Sassafras_albidum|C468241	Sassafras_tzumu|scaffold18106	0.1543	3.6748
65	Saururus_cernuus|C231844	Saururus_chinensis|scaffold14584	0.2236	8.5509
66	Campsis_grandiflora|scaffold31396	Campsis_radicans|C348122	0.2551	3.0412	0.0009
66	Convallaria_lmajalis|C644216	Convallaria_majalis|scaffold26173	0.4919	3.1878
66	Cotinus_coggygria|C351178	Cotinus_obovatus|scaffold11672	0.206	1.893
66	Croomia_japonica|C810606	Croomia_paueiflora|C449274	0.3366	8.968
66	Dysosma_pleiantha|scaffold25293	Dysosma_versipellis|scaffold27640	0.108	2.5943
66	Gelsemium_elegans|C200236	Gelsemium_sempervirens|C246899	0.3474	8.9985
66	Hamamelis_japonica|C353558	Hamamelis_vernalis|C304343	0.2552	5.5288
66	Nelumbo_lutea|C216883	Nelumbo_nucifera|C260636	0.9505	3.3116
66	Phryma_Aleptostachya|C463795	Phryma_leptostachya|C341777	0.2569	3.5623
66	Saururus_cernuus|C213333	Saururus_chinensis|C245247	0.408	8.5509
67	Calycanthus_chinensis|C384146	Calycanthus_occidentalis|C375920	0.071	4.6742	0.0228
67	Campsis_grandiflora|scaffold22068	Campsis_radicans|scaffold7266	0.1217	3.0412
67	Cornus_alternifolia|C397034	Cornus_controversa|scaffold10737	0.3531	3.2374
67	Cornus_ellipica|scaffold2059	Cornus_florida|C390606	0.0667	10.6664
67	Croomia_japonica|C843772	Croomia_paueiflora|C465642	0.2071	8.968
67	Liquidambar_styraciflua|scaffold15578	Liquidambar_formosana|scaffold32533	0.2645	3.6581
67	Meehania_cordata|C249571	Meehania_fargesii|C368508	0.1222	4.4223
67	Penthorum_chinense|C221604	Penthorum_sedoides|scaffold9143	0.0545	2.8522
67	Sassafras_albidum|C463387	Sassafras_tzumu|scaffold20360	0.0751	3.6748
68	Calycanthus_chinensis|C392040	Calycanthus_occidentalis|C385476	0.0413	4.6742	0.0539
68	Campsis_grandiflora|scaffold16074	Campsis_radicans|C368006	0.05	3.0412
68	Convallaria_lmajalis|C663004	Convallaria_majalis|scaffold42083	0.1629	3.1878
68	Dysosma_pleiantha|scaffold29449	Dysosma_versipellis|C762950	0.1563	2.5943
68	Gelsemium_elegans|C214940	Gelsemium_sempervirens|scaffold10173	0.249	8.9985
68	Hamamelis_japonica|scaffold21716	Hamamelis_vernalis|C327547	0.2215	5.5288
68	Liquidambar_styraciflua|C439895	Liquidambar_formosana|C669624	0.1755	3.6581
68	Meehania_cordata|C260915	Meehania_fargesii|C375505	0.2661	4.4223
68	Menispermum_canadense|C544725	Menispermum_dauricum|scaffold32665	0.498	5.089
68	Nelumbo_lutea|C254767	Nelumbo_nucifera|scaffold4701	0.4925	3.3116
68	Penthorum_chinense|C221322	Penthorum_sedoides|C212191	0.036	2.8522
68	Phryma_Aleptostachya|C493240	Phryma_leptostachya|C364143	0.2701	3.5623
68	Sassafras_albidum|C472977	Sassafras_tzumu|C407640	0.1624	3.6748
69	Calycanthus_chinensis|scaffold11801	Calycanthus_occidentalis|scaffold18325	0.4367	4.6742	0.0002
69	Cornus_ellipica|C526794	Cornus_florida|C393726	0.6109	10.6664
69	Croomia_japonica|C805908	Croomia_paueiflora|C458804	0.4333	8.968
69	Dysosma_pleiantha|C680845	Dysosma_versipellis|C729937	0.1134	2.5943
69	Gelsemium_elegans|C199194	Gelsemium_sempervirens|C243603	0.1488	8.9985
69	Hamamelis_japonica|scaffold8065	Hamamelis_vernalis|scaffold12614	0.1444	5.5288
69	Liriodendron_chinense|scaffold9678	Liriodendron_tulipifera|scaffold285	0.7394	1.6912
69	Menispermum_canadense|C512877	Menispermum_dauricum|scaffold3403	0.9872	5.089
69	Nelumbo_lutea|C230479	Nelumbo_nucifera|C264476	0.1431	3.3116
70	Croomia_japonica|C784163	Croomia_paueiflora|scaffold14446	0.2004	8.968	0.2165
70	Gelsemium_elegans|scaffold3029	Gelsemium_sempervirens|C188872	1.09	8.9985
70	Liquidambar_styraciflua|C403375	Liquidambar_formosana|C634682	0.3753	3.6581
70	Penthorum_chinense|scaffold3337	Penthorum_sedoides|C180667	0.2698	2.8522
71	Calycanthus_chinensis|C382572	Calycanthus_occidentalis|C369573	0.3844	4.6742	0.017
71	Campsis_grandiflora|C469332	Campsis_radicans|scaffold20167	0.177	3.0412
71	Dysosma_pleiantha|C712372	Dysosma_versipellis|scaffold27825	0.1451	2.5943
71	Gelsemium_elegans|C201829	Gelsemium_sempervirens|C250373	0.1252	8.9985
71	Hamamelis_japonica|C364784	Hamamelis_vernalis|C313440	0.6344	5.5288
71	Liquidambar_styraciflua|C423602	Liquidambar_formosana|C659862	0.0613	3.6581
71	Liriodendron_chinense|scaffold40957	Liriodendron_tulipifera|scaffold16958	0.5783	1.6912
71	Meehania_cordata|C241283	Meehania_fargesii|C362046	0.1227	4.4223
71	Nelumbo_lutea|C236199	Nelumbo_nucifera|C276038	0.188	3.3116
71	Penthorum_chinense|scaffold3382	Penthorum_sedoides|scaffold2651	0.2787	2.8522
72	Calycanthus_chinensis|C384106	Calycanthus_occidentalis|C375476	0.5255	4.6742	0.369
72	Cornus_ellipica|C542934	Cornus_florida|C395690	0.1275	10.6664
72	Croomia_japonica|C845360	Croomia_paueiflora|C460180	0.0291	8.968
72	Gelsemium_elegans|C212616	Gelsemium_sempervirens|scaffold12609	0.0893	8.9985
72	Hamamelis_japonica|scaffold10097	Hamamelis_vernalis|C309826	0.1517	5.5288
72	Liquidambar_styraciflua|C429104	Liquidambar_formosana|C665150	0.2181	3.6581
72	Meehania_cordata|scaffold2425	Meehania_fargesii|C369360	0.1462	4.4223
72	Menispermum_canadense|C542113	Menispermum_dauricum|C671673	0.2686	5.089
72	Nelumbo_lutea|C249423	Nelumbo_nucifera|C280228	0.3723	3.3116
72	Penthorum_chinense|C215644	Penthorum_sedoides|C203943	0.1794	2.8522
72	Phryma_Aleptostachya|C486086	Phryma_leptostachya|C359581	0.3106	3.5623
72	Saururus_cernuus|C229244	Saururus_chinensis|C260794	0.1022	8.5509
73	Calycanthus_chinensis|C394074	Calycanthus_occidentalis|C386742	0.1	4.6742	0.0002
73	Campsis_grandiflora|scaffold1913	Campsis_radicans|C363730	0.3437	3.0412
73	Cornus_alternifolia|scaffold16806	Cornus_controversa|C409832	0.1865	3.2374
73	Cornus_ellipica|scaffold23725	Cornus_florida|C402190	0.2241	10.6664
73	Croomia_japonica|scaffold27058	Croomia_paueiflora|C469171	0.3441	8.968
73	Dysosma_pleiantha|C277125	Dysosma_versipellis|C329561	0.3582	2.5943
73	Gelsemium_elegans|C219166	Gelsemium_sempervirens|C269532	0.2584	8.9985
73	Hamamelis_japonica|scaffold18139	Hamamelis_vernalis|C325827	0.2558	5.5288
73	Liquidambar_styraciflua|C438581	Liquidambar_formosana|C669166	0.0974	3.6581
73	Liriodendron_chinense|scaffold41228	Liriodendron_tulipifera|C445181	0.3129	1.6912
73	Meehania_cordata|scaffold10825	Meehania_fargesii|scaffold1925	0.1614	4.4223
73	Menispermum_canadense|C544257	Menispermum_dauricum|scaffold14306	0.1224	5.089
73	Nelumbo_lutea|C253739	Nelumbo_nucifera|C283836	0.4913	3.3116
73	Penthorum_chinense|C221330	Penthorum_sedoides|C207014	0.3617	2.8522
73	Phryma_Aleptostachya|C494738	Phryma_leptostachya|C367241	0.0939	3.5623
73	Sassafras_albidum|scaffold22777	Sassafras_tzumu|C406534	0.192	3.6748
73	Saururus_cernuus|C234238	Saururus_chinensis|C268350	0.3218	8.5509
74	Calycanthus_chinensis|C362370	Calycanthus_occidentalis|C321582	0.2005	4.6742	0.0101
74	Campsis_grandiflora|scaffold30148	Campsis_radicans|C334624	0.3912	3.0412
74	Croomia_japonica|scaffold25674	Croomia_paueiflora|C446860	0.4823	8.968
74	Gelsemium_elegans|scaffold11338	Gelsemium_sempervirens|C249323	0.2612	8.9985
74	Meehania_cordata|C232852	Meehania_fargesii|C350758	0.6635	4.4223
74	Saururus_cernuus|C194248	Saururus_chinensis|C236687	0.4349	8.5509
75	Calycanthus_chinensis|C382114	Calycanthus_occidentalis|C375664	0.0932	4.6742	0.0182
75	Convallaria_lmajalis|C660552	Convallaria_majalis|scaffold41252	0.0643	3.1878
75	Cornus_alternifolia|scaffold21236	Cornus_controversa|C400618	0.5733	3.2374
75	Cornus_ellipica|C544206	Cornus_florida|C388318	0.3413	10.6664
75	Cotinus_coggygria|scaffold9797	Cotinus_obovatus|C341622	1.2669	1.893
75	Croomia_japonica|scaffold30855	Croomia_paueiflora|scaffold20916	0.8785	8.968
75	Dysosma_pleiantha|scaffold29887	Dysosma_versipellis|scaffold22538	0.2747	2.5943
75	Gelsemium_elegans|C210033	Gelsemium_sempervirens|C260712	0.7079	8.9985
75	Hamamelis_japonica|C376066	Hamamelis_vernalis|C318294	0.2856	5.5288
75	Liquidambar_styraciflua|scaffold21368	Liquidambar_formosana|scaffold22237	0.1902	3.6581
75	Liriodendron_chinense|C813163	Liriodendron_tulipifera|C440797	0.2418	1.6912
75	Meehania_cordata|scaffold13736	Meehania_fargesii|C369604	0.3685	4.4223
75	Nelumbo_lutea|C244525	Nelumbo_nucifera|C276808	0.4289	3.3116
75	Penthorum_chinense|C218076	Penthorum_sedoides|C205489	0.3618	2.8522
75	Phryma_Aleptostachya|C482480	Phryma_leptostachya|C354029	0.1887	3.5623
75	Sassafras_albidum|C467051	Sassafras_tzumu|C403102	0.1469	3.6748
75	Saururus_cernuus|C206271	Saururus_chinensis|C264666	0.2945	8.5509
76	Calycanthus_chinensis|C343823	Calycanthus_occidentalis|C285989	0.3697	4.6742	0.0026
76	Convallaria_lmajalis|C626750	Convallaria_majalis|C757203	0.132	3.1878
76	Dysosma_pleiantha|scaffold21520	Dysosma_versipellis|scaffold27959	0.1386	2.5943
76	Hamamelis_japonica|C346318	Hamamelis_vernalis|C289881	0.1031	5.5288
76	Liquidambar_styraciflua|C395820	Liquidambar_formosana|C563530	0.4128	3.6581
76	Meehania_cordata|C228816	Meehania_fargesii|C340069	2.1681	4.4223
76	Sassafras_albidum|C384519	Sassafras_tzumu|C339399	0.1781	3.6748
76	Saururus_cernuus|scaffold8765	Saururus_chinensis|C220089	0.1482	8.5509
77	Croomia_japonica|C821214	Croomia_paueiflora|C451480	0.0554	8.968	0.7647
77	Gelsemium_elegans|C195548	Gelsemium_sempervirens|C244581	0.1557	8.9985
77	Hamamelis_japonica|scaffold1609	Hamamelis_vernalis|C302949	0.19	5.5288
77	Nelumbo_lutea|C229155	Nelumbo_nucifera|C264536	0.2481	3.3116
77	Saururus_cernuus|C222158	Saururus_chinensis|C257173	0.0905	8.5509
78	Calycanthus_chinensis|C373172	Calycanthus_occidentalis|C365085	0.1966	4.6742	0.098
78	Campsis_grandiflora|C480934	Campsis_radicans|scaffold21180	0.0822	3.0412
78	Convallaria_lmajalis|C653328	Convallaria_majalis|scaffold35730	0.7821	3.1878
78	Cornus_alternifolia|scaffold7061	Cornus_controversa|scaffold13408	0.3492	3.2374
78	Cornus_ellipica|C525354	Cornus_florida|C387136	0.25	10.6664
78	Cotinus_coggygria|C365111	Cotinus_obovatus|C342516	0.2742	1.893
78	Croomia_japonica|scaffold518	Croomia_paueiflora|C462720	0.0692	8.968
78	Dysosma_pleiantha|C719344	Dysosma_versipellis|C753400	0.3933	2.5943
78	Gelsemium_elegans|C205259	Gelsemium_sempervirens|C253672	0.2005	8.9985
78	Hamamelis_japonica|scaffold7519	Hamamelis_vernalis|C314422	0.1731	5.5288
78	Liquidambar_styraciflua|C424938	Liquidambar_formosana|scaffold14865	0.1034	3.6581
78	Liriodendron_chinense|C675027	Liriodendron_tulipifera|scaffold8227	0.6649	1.6912
78	Meehania_cordata|C241141	Meehania_fargesii|C359352	0.1412	4.4223
78	Phryma_Aleptostachya|C476760	Phryma_leptostachya|C351647	0.03	3.5623
78	Sassafras_albidum|scaffold12451	Sassafras_tzumu|scaffold7984	0.2837	3.6748
78	Saururus_cernuus|C216002	Saururus_chinensis|C253031	0.3186	8.5509
79	Calycanthus_chinensis|C383832	Calycanthus_occidentalis|C378360	0.0562	4.6742	0.0608
79	Campsis_grandiflora|scaffold32328	Campsis_radicans|C352512	0.5568	3.0412
79	Cornus_alternifolia|scaffold21748	Cornus_controversa|C396668	0.1308	3.2374
79	Cornus_ellipica|scaffold15151	Cornus_florida|scaffold17906	0.5899	10.6664
79	Cotinus_coggygria|C364711	Cotinus_obovatus|C345314	0.3973	1.893
79	Croomia_japonica|C843194	Croomia_paueiflora|scaffold5641	0.5028	8.968
79	Dysosma_pleiantha|C719334	Dysosma_versipellis|C754682	0.0969	2.5943
79	Gelsemium_elegans|C207173	Gelsemium_sempervirens|C260082	0.1168	8.9985
79	Hamamelis_japonica|C371990	Hamamelis_vernalis|scaffold4312	0.9674	5.5288
79	Meehania_cordata|C250291	Meehania_fargesii|C366628	0.1288	4.4223
79	Nelumbo_lutea|C248483	Nelumbo_nucifera|C275698	0.2101	3.3116
79	Penthorum_chinense|C213588	Penthorum_sedoides|C201967	0.1966	2.8522
79	Phryma_Aleptostachya|C484456	Phryma_leptostachya|C355900	0.3703	3.5623
79	Sassafras_albidum|C474857	Sassafras_tzumu|C402298	0.1386	3.6748
79	Saururus_cernuus|scaffold5919	Saururus_chinensis|C262408	0.2288	8.5509

## Sheet: r value
Families	R2	r		Yellow color indicates negative relationship and blue color indicates postive relationship
77	0.7647	0.874471
64	0.7374	0.85872
3	0.6529	0.808022
33	0.5804	0.76184
72	0.369	0.607454
63	0.3124	0.558928
36	0.301	0.548635
24	0.2929	0.541202
10	0.2317	0.481352
9	0.2285	0.478017
70	0.2165	0.465296
61	0.1995	0.446654
15	0.193	0.439318
16	0.174	0.417133
13	0.152	0.389872
30	0.1417	0.376431
2	0.1292	0.359444
18	0.1179	0.343366
4	0.1136	0.337046
25	0.1069	0.326956
78	0.098	0.31305
42	0.0869	0.294788
19	0.0857	0.292746
12	0.0795	0.281957
53	0.0665	0.257876
26	0.0654	0.255734
35	0.0618	0.248596
79	0.0608	0.246577
68	0.0539	0.232164
55	0.0514	0.226716
27	0.0499	0.223383
48	0.0495	0.222486
56	0.0487	0.220681
51	0.0461	0.214709
34	0.0454	0.213073
1	0.0434	0.208327
14	0.0398	0.199499
62	0.0395	0.198746
38	0.0366	0.191311
40	0.0365	0.19105
32	0.0333	0.182483
45	0.0292	0.17088
37	0.0262	0.161864
23	0.0238	0.154272
67	0.0228	0.150997
54	0.0205	0.143178
46	0.0204	0.142829
65	0.0195	0.139642
75	0.0182	0.134907
11	0.0174	0.131909
8	0.017	0.130384
71	0.017	0.130384
21	0.0155	0.124499
5	0.0151	0.122882
47	0.0141	0.118743
17	0.014	0.118322
31	0.0135	0.11619
22	0.0106	0.102956
59	0.0101	0.100499
74	0.0101	0.100499
44	0.0082	0.0905539
20	0.0065	0.0806226
57	0.005	0.0707107
6	0.0038	0.0616441
76	0.0026	0.0509902
52	0.0009	0.03
66	0.0009	0.03
41	0.0007	0.0264575
58	0.0005	0.0223607
43	0.0002	0.0141421
69	0.0002	0.0141421
73	0.0002	0.0141421
28	0.0001	0.01
39	0.0001	0.01
50	0.0001	0.01
60	0.0001	0.01
7	3e-05	0.00547723
49
