# Supplementary material for: Natural selection and repeated patterns of molecular evolution following allopatric divergence
Source: eLife. 2019 Aug 2;8:e45199. doi: 10.7554/eLife.45199 (PMC6744222; doi:10.7554/eLife.45199)
Supplement: Supplementary file 8. [file elife-45199-supp8.xlsx]

## Sheet: scg_kaks_omegefiltered
Families	Gene1	Gene2	omega	dN	+-	SE	dS	+-	SE	Divergence time
1	Cotinus_coggygria|scaffold4398	Cotinus_obovatus|scaffold12757	0.4707	0.0042	+-	0.0042	0.009	+-	0.009	1.893
1	Croomia_japonica|C823634	Croomia_paueiflora|C438392	0.3936	0.0308	+-	0.0113	0.0784	+-	0.0273	8.968
1	Dysosma_pleiantha|C707940	Dysosma_versipellis|C736495	0.4084	0.0038	+-	0.0038	0.0092	+-	0.0093	2.5943
1	Gelsemium_elegans|scaffold10711	Gelsemium_sempervirens|C241303	0.1773	0.0125	+-	0.0072	0.0704	+-	0.0274	8.9985
1	Liquidambar_styraciflua|C398851	Liquidambar_formosana|scaffold15022	0.1175	0.0041	+-	0.0041	0.0351	+-	0.0178	3.6581
2	Acorus_calamus|C160688	Acorus_gramineus|C244209	0.2892	0.0174	+-	0.0101	0.0603	+-	0.0305	8.5457
2	Campsis_grandiflora|scaffold9512	Campsis_radicans|C322552	0.2062	0.0053	+-	0.0053	0.0256	+-	0.0182	3.0412
2	Croomia_japonica|C806816	Croomia_paueiflora|C427448	0.2144	0.0225	+-	0.0113	0.105	+-	0.0447	8.968
2	Gelsemium_elegans|C195752	Gelsemium_sempervirens|C247315	0.4202	0.0304	+-	0.0131	0.0723	+-	0.0347	8.9985
2	Hamamelis_japonica|scaffold2058	Hamamelis_vernalis|scaffold1775	0.0679	0.0057	+-	0.0057	0.0837	+-	0.038	5.5288
2	Menispermum_canadense|scaffold3631	Menispermum_dauricum|scaffold9877	0.3567	0.0054	+-	0.0054	0.0152	+-	0.0152	5.089
3	Acorus_calamus|C175472	Acorus_gramineus|scaffold15096	0.0452	0.0023	+-	0.0023	0.0502	+-	0.0179	8.5457
3	Calycanthus_chinensis|C368298	Calycanthus_occidentalis|C362399	0.1863	0.0065	+-	0.0038	0.035	+-	0.0158	4.6742
3	Convallaria_lmajalis|C641526	Convallaria_majalis|C795427	0.1557	0.0046	+-	0.0032	0.0294	+-	0.0132	3.1878
3	Cornus_alternifolia|C389866	Cornus_controversa|C391848	0.1139	0.0022	+-	0.0022	0.0194	+-	0.0113	3.2374
3	Cornus_ellipica|scaffold29445	Cornus_florida|C384068	0.4402	0.0088	+-	0.0044	0.02	+-	0.0116	10.6664
3	Croomia_japonica|C829380	Croomia_paueiflora|C453702	0.3515	0.0067	+-	0.0039	0.019	+-	0.011	8.968
3	Gelsemium_elegans|C200438	Gelsemium_sempervirens|C247381	0.2966	0.013	+-	0.0053	0.0438	+-	0.0182	8.9985
3	Hamamelis_japonica|scaffold11328	Hamamelis_vernalis|C305223	0.3765	0.0114	+-	0.0051	0.0304	+-	0.0137	5.5288
3	Liquidambar_styraciflua|C419906	Liquidambar_formosana|C651818	0.1525	0.0043	+-	0.0031	0.0283	+-	0.0143	3.6581
3	Meehania_cordata|scaffold9062	Meehania_fargesii|C349522	0.1983	0.0043	+-	0.003	0.0216	+-	0.0125	4.4223
3	Menispermum_canadense|scaffold8970	Menispermum_dauricum|C649046	0.3811	0.0115	+-	0.0052	0.0302	+-	0.0136	5.089
3	Penthorum_chinense|C200120	Penthorum_sedoides|C192631	0.1164	0.0022	+-	0.0022	0.0192	+-	0.0111	2.8522
3	Phryma_Aleptostachya|C477126	Phryma_leptostachya|C351831	0.221	0.0044	+-	0.0031	0.0199	+-	0.0115	3.5623
3	Sassafras_albidum|C456993	Sassafras_tzumu|C385316	0.076	0.0022	+-	0.0022	0.0287	+-	0.0145	3.6748
3	Saururus_cernuus|C210075	Saururus_chinensis|C246589	0.3479	0.0094	+-	0.0047	0.0271	+-	0.0136	8.5509
4	Acorus_calamus|C190257	Acorus_gramineus|scaffold15294	0.2172	0.0072	+-	0.0032	0.0334	+-	0.0119	8.5457
4	Calycanthus_chinensis|C393336	Calycanthus_occidentalis|C384784	0.1582	0.0025	+-	0.0015	0.016	+-	0.0066	4.6742
4	Campsis_grandiflora|C501967	Campsis_radicans|C357936	0.0873	0.0021	+-	0.0015	0.0238	+-	0.0085	3.0412
4	Convallaria_lmajalis|C659808	Convallaria_majalis|C815160	0.3957	0.001	+-	0.001	0.0026	+-	0.0026	3.1878
4	Cornus_ellipica|C544078	Cornus_florida|scaffold18967	0.2976	0.0091	+-	0.0029	0.0304	+-	0.0082	10.6664
4	Cotinus_coggygria|C380759	Cotinus_obovatus|C358700	0.2656	0.0027	+-	0.0015	0.01	+-	0.005	1.893
4	Croomia_japonica|C854228	Croomia_paueiflora|C476065	0.2142	0.0103	+-	0.0031	0.0481	+-	0.0109	8.968
4	Dysosma_pleiantha|C728084	Dysosma_versipellis|C762748	0.1158	0.0035	+-	0.0017	0.0301	+-	0.0088	2.5943
4	Gelsemium_elegans|C215707	Gelsemium_sempervirens|C264902	0.198	0.0099	+-	0.003	0.0502	+-	0.0117	8.9985
4	Hamamelis_japonica|C382674	Hamamelis_vernalis|C325509	0.1933	0.0045	+-	0.002	0.0231	+-	0.007	5.5288
4	Liquidambar_styraciflua|C433917	Liquidambar_formosana|scaffold30129	0.0693	0.002	+-	0.0014	0.0285	+-	0.0086	3.6581
4	Liriodendron_chinense|scaffold35695	Liriodendron_tulipifera|scaffold17733	0.0852	0.0017	+-	0.0012	0.0199	+-	0.0067	1.6912
4	Meehania_cordata|C257777	Meehania_fargesii|scaffold14237	0.0515	0.0027	+-	0.0016	0.053	+-	0.0123	4.4223
4	Menispermum_canadense|scaffold38139	Menispermum_dauricum|C676919	0.257	0.0081	+-	0.0027	0.0314	+-	0.0088	5.089
4	Penthorum_chinense|C219026	Penthorum_sedoides|C201323	0.0867	0.0024	+-	0.0017	0.0279	+-	0.01	2.8522
4	Phryma_Aleptostachya|C491388	Phryma_leptostachya|C362391	0.3278	0.0031	+-	0.0018	0.0096	+-	0.0048	3.5623
4	Sassafras_albidum|scaffold20511	Sassafras_tzumu|C408414	0.2635	0.0044	+-	0.002	0.0166	+-	0.0063	3.6748
4	Saururus_cernuus|scaffold2109	Saururus_chinensis|scaffold6789	0.3341	0.003	+-	0.0021	0.009	+-	0.0063	8.5509
5	Acorus_calamus|C194849	Acorus_gramineus|C268559	0.2224	0.0218	+-	0.0077	0.0979	+-	0.0271	8.5457
5	Cornus_alternifolia|C378892	Cornus_controversa|C379617	0.1251	0.0027	+-	0.0027	0.0214	+-	0.0124	3.2374
5	Cornus_ellipica|scaffold26427	Cornus_florida|C373446	0.1542	0.0133	+-	0.006	0.0866	+-	0.0266	10.6664
5	Cotinus_coggygria|scaffold8913	Cotinus_obovatus|scaffold18289	0.1716	0.0055	+-	0.0039	0.0319	+-	0.0161	1.893
5	Croomia_japonica|C817628	Croomia_paueiflora|C452038	0.3968	0.0121	+-	0.0061	0.0304	+-	0.0153	8.968
5	Dysosma_pleiantha|scaffold29593	Dysosma_versipellis|C760920	0.3805	0.0054	+-	0.0039	0.0143	+-	0.0101	2.5943
5	Gelsemium_elegans|C201587	Gelsemium_sempervirens|scaffold9973	0.3872	0.0291	+-	0.0131	0.0751	+-	0.0345	8.9985
5	Meehania_cordata|C236505	Meehania_fargesii|C350346	0.4319	0.0029	+-	0.0029	0.0068	+-	0.0068	4.4223
5	Menispermum_canadense|scaffold31479	Menispermum_dauricum|scaffold40580	0.2723	0.0083	+-	0.0048	0.0305	+-	0.0153	5.089
5	Nelumbo_lutea|C229181	Nelumbo_nucifera|C261808	0.2574	0.0055	+-	0.0039	0.0215	+-	0.0125	3.3116
5	Penthorum_chinense|C209836	Penthorum_sedoides|C191713	0.1124	0.0027	+-	0.0027	0.0242	+-	0.014	2.8522
5	Phryma_Aleptostachya|scaffold3593	Phryma_leptostachya|scaffold3833	0.0701	0.0028	+-	0.0028	0.0394	+-	0.0162	3.5623
5	Saururus_cernuus|C220174	Saururus_chinensis|C250643	0.0609	0.0056	+-	0.0039	0.0915	+-	0.0262	8.5509
6	Acorus_calamus|scaffold10639	Acorus_gramineus|C257539	0.0502	0.007	+-	0.0041	0.1403	+-	0.0367	8.5457
6	Calycanthus_chinensis|C376286	Calycanthus_occidentalis|C366287	0.2053	0.0075	+-	0.0043	0.0366	+-	0.015	4.6742
6	Convallaria_lmajalis|scaffold37039	Convallaria_majalis|scaffold19076	0.1624	0.0122	+-	0.0055	0.075	+-	0.0233	3.1878
6	Croomia_japonica|scaffold26763	Croomia_paueiflora|C442658	0.1204	0.0075	+-	0.0053	0.062	+-	0.0284	8.968
6	Hamamelis_japonica|C357438	Hamamelis_vernalis|C304607	0.4268	0.0139	+-	0.0057	0.0326	+-	0.0134	5.5288
6	Liquidambar_styraciflua|C414685	Liquidambar_formosana|C651298	0.267	0.0046	+-	0.0033	0.0174	+-	0.0101	3.6581
6	Menispermum_canadense|scaffold16693	Menispermum_dauricum|scaffold43100	0.191	0.0025	+-	0.0025	0.0132	+-	0.0093	5.089
6	Penthorum_chinense|C198101	Penthorum_sedoides|C188052	0.2679	0.0054	+-	0.0039	0.0203	+-	0.0118	2.8522
6	Sassafras_albidum|C438125	Sassafras_tzumu|C369887	0.1194	0.0026	+-	0.0026	0.0217	+-	0.0126	3.6748
7	Acorus_calamus|scaffold2094	Acorus_gramineus|scaffold12387	0.4915	0.0132	+-	0.0047	0.0269	+-	0.0121	8.5457
7	Campsis_grandiflora|C494741	Campsis_radicans|C346874	0.4056	0.0077	+-	0.0039	0.0191	+-	0.0096	3.0412
7	Cornus_alternifolia|C391824	Cornus_controversa|C392998	0.2294	0.0071	+-	0.0035	0.0308	+-	0.0138	3.2374
7	Cornus_ellipica|C530528	Cornus_florida|scaffold9649	0.3563	0.0288	+-	0.0076	0.0809	+-	0.0246	10.6664
7	Cotinus_coggygria|scaffold18300	Cotinus_obovatus|C351424	0.3916	0.0046	+-	0.0026	0.0117	+-	0.0068	1.893
7	Croomia_japonica|scaffold35338	Croomia_paueiflora|C462750	0.2475	0.0199	+-	0.0063	0.0805	+-	0.0262	8.968
7	Dysosma_pleiantha|C719504	Dysosma_versipellis|scaffold27129	0.2036	0.0045	+-	0.0032	0.0223	+-	0.0129	2.5943
7	Gelsemium_elegans|scaffold11890	Gelsemium_sempervirens|scaffold12823	0.2522	0.0127	+-	0.0048	0.0504	+-	0.017	8.9985
7	Hamamelis_japonica|scaffold20563	Hamamelis_vernalis|C318046	0.1104	0.0087	+-	0.0039	0.0787	+-	0.0233	5.5288
7	Liquidambar_styraciflua|C422908	Liquidambar_formosana|scaffold32594	0.1939	0.0057	+-	0.0033	0.0294	+-	0.0121	3.6581
7	Liriodendron_chinense|scaffold30202	Liriodendron_tulipifera|C442445	0.268	0.0038	+-	0.0027	0.0141	+-	0.0081	1.6912
7	Menispermum_canadense|C524563	Menispermum_dauricum|C670559	0.359	0.0127	+-	0.0064	0.0354	+-	0.0205	5.089
7	Penthorum_chinense|C206742	Penthorum_sedoides|C197341	0.0606	0.0019	+-	0.0019	0.0307	+-	0.0126	2.8522
7	Phryma_Aleptostachya|C471024	Phryma_leptostachya|scaffold13009	0.1906	0.0119	+-	0.0045	0.0627	+-	0.0212	3.5623
7	Sassafras_albidum|scaffold19917	Sassafras_tzumu|C399350	0.1058	0.0036	+-	0.0025	0.0341	+-	0.0141	3.6748
8	Acorus_calamus|C149874	Acorus_gramineus|scaffold14737	0.1118	0.0179	+-	0.0104	0.1603	+-	0.0859	8.5457
8	Convallaria_lmajalis|scaffold32387	Convallaria_majalis|scaffold36336	0.1947	0.0092	+-	0.0065	0.0473	+-	0.0239	3.1878
8	Cornus_ellipica|scaffold26879	Cornus_florida|C371144	0.3798	0.0066	+-	0.0066	0.0174	+-	0.0175	10.6664
8	Croomia_japonica|scaffold1392	Croomia_paueiflora|C417728	0.2761	0.0186	+-	0.0108	0.0673	+-	0.0393	8.968
8	Gelsemium_elegans|C194826	Gelsemium_sempervirens|C242443	0.272	0.0174	+-	0.0101	0.0641	+-	0.0327	8.9985
8	Liquidambar_styraciflua|scaffold11431	Liquidambar_formosana|scaffold30194	0.1137	0.006	+-	0.006	0.053	+-	0.0309	3.6581
8	Penthorum_chinense|C189155	Penthorum_sedoides|C178172	0.3378	0.007	+-	0.007	0.0208	+-	0.0208	2.8522
8	Phryma_Aleptostachya|C363559	Phryma_leptostachya|C315245	0.4233	0.0072	+-	0.0072	0.0171	+-	0.0171	3.5623
9	Calycanthus_chinensis|C380926	Calycanthus_occidentalis|C375052	0.0935	0.0029	+-	0.0021	0.0312	+-	0.0119	4.6742
9	Campsis_grandiflora|scaffold22109	Campsis_radicans|scaffold22791	0.2156	0.0048	+-	0.0028	0.0221	+-	0.0091	3.0412
9	Cornus_alternifolia|C390614	Cornus_controversa|scaffold6131	0.0754	0.0019	+-	0.0019	0.0258	+-	0.0116	3.2374
9	Cornus_ellipica|C534950	Cornus_florida|C273463	0.4368	0.0147	+-	0.0085	0.0336	+-	0.0239	10.6664
9	Croomia_japonica|C795746	Croomia_paueiflora|C437934	0.1116	0.0027	+-	0.0027	0.0239	+-	0.012	8.968
9	Gelsemium_elegans|scaffold10406	Gelsemium_sempervirens|scaffold13747	0.2539	0.0168	+-	0.0051	0.066	+-	0.0168	8.9985
9	Hamamelis_japonica|C363518	Hamamelis_vernalis|scaffold11799	0.1694	0.0081	+-	0.0036	0.0476	+-	0.0145	5.5288
9	Liquidambar_styraciflua|C425826	Liquidambar_formosana|C661374	0.1455	0.0031	+-	0.0022	0.0216	+-	0.0089	3.6581
9	Meehania_cordata|C244519	Meehania_fargesii|C367094	0.1759	0.0051	+-	0.0029	0.0287	+-	0.011	4.4223
10	Cornus_alternifolia|C358674	Cornus_controversa|C374145	0.0715	0.0048	+-	0.0048	0.0666	+-	0.039	3.2374
10	Cotinus_coggygria|scaffold14964	Cotinus_obovatus|C317746	0.3326	0.011	+-	0.0078	0.0329	+-	0.0234	1.893
10	Gelsemium_elegans|C194956	Gelsemium_sempervirens|scaffold12326	0.2082	0.0119	+-	0.0084	0.0569	+-	0.0288	8.9985
10	Liquidambar_styraciflua|C365815	Liquidambar_formosana|C632872	0.1918	0.0104	+-	0.0073	0.054	+-	0.0315	3.6581
10	Meehania_cordata|scaffold13984	Meehania_fargesii|scaffold817	0.1269	0.012	+-	0.0085	0.0944	+-	0.0433	4.4223
10	Menispermum_canadense|C502982	Menispermum_dauricum|C616587	0.1891	0.0059	+-	0.0059	0.0312	+-	0.0226	5.089
11	Acorus_calamus|C160558	Acorus_gramineus|C247729	0.4266	0.0264	+-	0.01	0.0618	+-	0.0256	8.5457
11	Convallaria_lmajalis|C642220	Convallaria_majalis|scaffold29192	0.2706	0.0036	+-	0.0036	0.0132	+-	0.0132	3.1878
11	Cotinus_coggygria|C350006	Cotinus_obovatus|C318660	0.0749	0.0036	+-	0.0036	0.0482	+-	0.0244	1.893
11	Gelsemium_elegans|C187957	Gelsemium_sempervirens|scaffold6989	0.2268	0.0154	+-	0.0077	0.0677	+-	0.0284	8.9985
11	Liquidambar_styraciflua|C401385	Liquidambar_formosana|C624272	0.0588	0.004	+-	0.004	0.0682	+-	0.0248	3.6581
11	Menispermum_canadense|C505728	Menispermum_dauricum|C623343	0.411	0.0038	+-	0.0038	0.0093	+-	0.0093	5.089
11	Phryma_Aleptostachya|C454757	Phryma_leptostachya|C328563	0.2333	0.0041	+-	0.0041	0.0176	+-	0.0125	3.5623
12	Acorus_calamus|C160966	Acorus_gramineus|scaffold15702	0.1063	0.0058	+-	0.0041	0.0546	+-	0.021	8.5457
12	Calycanthus_chinensis|C366242	Calycanthus_occidentalis|C361615	0.3306	0.0105	+-	0.0053	0.0317	+-	0.0143	4.6742
12	Cornus_alternifolia|scaffold20891	Cornus_controversa|C381191	0.4315	0.0091	+-	0.0046	0.0211	+-	0.015	3.2374
12	Gelsemium_elegans|C196642	Gelsemium_sempervirens|C246839	0.0876	0.0098	+-	0.0049	0.1124	+-	0.0352	8.9985
12	Liquidambar_styraciflua|C412221	Liquidambar_formosana|scaffold19546	0.3123	0.0102	+-	0.0051	0.0326	+-	0.0165	3.6581
12	Meehania_cordata|C236469	Meehania_fargesii|scaffold10887	0.0708	0.007	+-	0.0041	0.0995	+-	0.034	4.4223
12	Menispermum_canadense|scaffold19776	Menispermum_dauricum|C648912	0.1085	0.0025	+-	0.0025	0.0226	+-	0.0131	5.089
12	Nelumbo_lutea|C230097	Nelumbo_nucifera|scaffold11646	0.2775	0.0049	+-	0.0034	0.0175	+-	0.0124	3.3116
12	Phryma_Aleptostachya|C458879	Phryma_leptostachya|C328155	0.2232	0.0078	+-	0.0045	0.0349	+-	0.0157	3.5623
13	Acorus_calamus|C163693	Acorus_gramineus|C246435	0.2341	0.0039	+-	0.0039	0.0168	+-	0.0119	8.5457
13	Calycanthus_chinensis|C366250	Calycanthus_occidentalis|C356549	0.3708	0.0077	+-	0.0054	0.0207	+-	0.0147	4.6742
13	Cornus_ellipica|C522725	Cornus_florida|C344059	0.1804	0.0075	+-	0.0053	0.0418	+-	0.0212	10.6664
13	Croomia_japonica|scaffold30560	Croomia_paueiflora|C446216	0.3412	0.0119	+-	0.0069	0.0349	+-	0.0176	8.968
13	Gelsemium_elegans|C194774	Gelsemium_sempervirens|scaffold9072	0.4956	0.0288	+-	0.0118	0.058	+-	0.0296	8.9985
13	Hamamelis_japonica|scaffold15686	Hamamelis_vernalis|C303643	0.3706	0.0037	+-	0.0037	0.0099	+-	0.0099	5.5288
13	Liquidambar_styraciflua|C403315	Liquidambar_formosana|C626538	0.2301	0.0073	+-	0.0052	0.0317	+-	0.0185	3.6581
13	Meehania_cordata|C224058	Meehania_fargesii|C344794	0.1754	0.0072	+-	0.0051	0.0413	+-	0.0209	4.4223
13	Phryma_Aleptostachya|C454901	Phryma_leptostachya|C332493	0.425	0.0035	+-	0.0035	0.0082	+-	0.0082	3.5623
13	Sassafras_albidum|C429815	Sassafras_tzumu|C376886	0.2889	0.0104	+-	0.006	0.036	+-	0.0182	3.6748
13	Saururus_cernuus|C226952	Saururus_chinensis|scaffold15457	0.0667	0.0037	+-	0.0037	0.0554	+-	0.023	8.5509
14	Cornus_alternifolia|C382412	Cornus_controversa|C393988	0.1497	0.0051	+-	0.0036	0.0341	+-	0.0153	3.2374
14	Cornus_ellipica|C519709	Cornus_florida|C380158	0.1814	0.0068	+-	0.0048	0.0373	+-	0.0189	10.6664
14	Cotinus_coggygria|scaffold17442	Cotinus_obovatus|C335649	0.0613	0.0032	+-	0.0032	0.0525	+-	0.024	1.893
14	Croomia_japonica|C824576	Croomia_paueiflora|scaffold16647	0.401	0.0157	+-	0.0064	0.039	+-	0.0161	8.968
14	Dysosma_pleiantha|scaffold25394	Dysosma_versipellis|C730895	0.113	0.0025	+-	0.0026	0.0226	+-	0.0131	2.5943
14	Hamamelis_japonica|C368184	Hamamelis_vernalis|C302029	0.301	0.0113	+-	0.0056	0.0374	+-	0.0188	5.5288
14	Menispermum_canadense|C526401	Menispermum_dauricum|scaffold10525	0.1956	0.006	+-	0.0043	0.0309	+-	0.018	5.089
14	Phryma_Aleptostachya|scaffold13141	Phryma_leptostachya|scaffold16588	0.1284	0.0054	+-	0.0038	0.0417	+-	0.0188	3.5623
14	Sassafras_albidum|C447913	Sassafras_tzumu|C370487	0.1099	0.0075	+-	0.0043	0.0682	+-	0.0244	3.6748
14	Saururus_cernuus|C216524	Saururus_chinensis|C252211	0.2396	0.0069	+-	0.0049	0.0289	+-	0.0168	8.5509
15	Cornus_ellipica|scaffold24473	Cornus_florida|C374784	0.0885	0.0041	+-	0.0041	0.0463	+-	0.0271	10.6664
15	Croomia_japonica|scaffold25070	Croomia_paueiflora|C440772	0.1462	0.0114	+-	0.0066	0.078	+-	0.0461	8.968
15	Gelsemium_elegans|C189471	Gelsemium_sempervirens|scaffold10436	0.0315	0.0041	+-	0.0041	0.1316	+-	0.0482	8.9985
15	Liquidambar_styraciflua|C417986	Liquidambar_formosana|C648414	0.0791	0.0077	+-	0.0054	0.097	+-	0.045	3.6581
15	Liriodendron_chinense|scaffold29359	Liriodendron_tulipifera|C408927	0.3299	0.0046	+-	0.0046	0.0139	+-	0.0139	1.6912
15	Nelumbo_lutea|C226335	Nelumbo_nucifera|C263772	0.3531	0.0078	+-	0.0055	0.022	+-	0.0156	3.3116
15	Phryma_Aleptostachya|scaffold15122	Phryma_leptostachya|C339653	0.1029	0.0042	+-	0.0042	0.0407	+-	0.0237	3.5623
15	Saururus_cernuus|C203053	Saururus_chinensis|C248564	0.0749	0.0081	+-	0.0057	0.1082	+-	0.0558	8.5509
16	Acorus_calamus|C166913	Acorus_gramineus|C239466	0.0831	0.007	+-	0.005	0.0842	+-	0.0323	8.5457
16	Calycanthus_chinensis|scaffold17143	Calycanthus_occidentalis|scaffold19102	0.3148	0.0057	+-	0.004	0.0181	+-	0.0128	4.6742
16	Cornus_ellipica|C524011	Cornus_florida|C377702	0.0957	0.003	+-	0.003	0.0315	+-	0.0159	10.6664
16	Croomia_japonica|C811364	Croomia_paueiflora|C445556	0.2015	0.0133	+-	0.006	0.0661	+-	0.0273	8.968
16	Dysosma_pleiantha|C701920	Dysosma_versipellis|C729319	0.3995	0.003	+-	0.003	0.0075	+-	0.0075	2.5943
16	Hamamelis_japonica|C357778	Hamamelis_vernalis|C301199	0.0833	0.006	+-	0.0042	0.0718	+-	0.0244	5.5288
16	Penthorum_chinense|C214196	Penthorum_sedoides|C202401	0.4127	0.0031	+-	0.0032	0.0076	+-	0.0076	2.8522
16	Sassafras_albidum|C404571	Sassafras_tzumu|C366152	0.1327	0.0068	+-	0.0048	0.0514	+-	0.0234	3.6748
16	Saururus_cernuus|scaffold4394	Saururus_chinensis|scaffold8135	0.1361	0.003	+-	0.003	0.0224	+-	0.013	8.5509
17	Convallaria_lmajalis|scaffold22452	Convallaria_majalis|scaffold41726	0.3691	0.0023	+-	0.0023	0.0061	+-	0.0061	3.1878
17	Cotinus_coggygria|C361025	Cotinus_obovatus|scaffold9570	0.1548	0.0049	+-	0.0035	0.0318	+-	0.0161	1.893
17	Hamamelis_japonica|C368324	Hamamelis_vernalis|scaffold12989	0.2731	0.01	+-	0.005	0.0364	+-	0.0164	5.5288
17	Liquidambar_styraciflua|C428004	Liquidambar_formosana|C654348	0.164	0.0049	+-	0.0035	0.0299	+-	0.015	3.6581
17	Meehania_cordata|C246479	Meehania_fargesii|scaffold12336	0.0571	0.0024	+-	0.0024	0.0418	+-	0.0189	4.4223
17	Nelumbo_lutea|C217553	Nelumbo_nucifera|C264150	0.4174	0.0054	+-	0.0038	0.013	+-	0.0092	3.3116
17	Phryma_Aleptostachya|C470144	Phryma_leptostachya|C345837	0.2625	0.007	+-	0.0041	0.0268	+-	0.0155	3.5623
18	Acorus_calamus|C180704	Acorus_gramineus|C267093	0.1692	0.0111	+-	0.0045	0.0653	+-	0.0179	8.5457
18	Calycanthus_chinensis|C371350	Calycanthus_occidentalis|C366501	0.1896	0.0054	+-	0.0031	0.0283	+-	0.0117	4.6742
18	Campsis_grandiflora|scaffold9570	Campsis_radicans|C344210	0.2029	0.009	+-	0.004	0.0444	+-	0.015	3.0412
18	Convallaria_lmajalis|C654196	Convallaria_majalis|scaffold5035	0.116	0.0055	+-	0.0032	0.047	+-	0.0151	3.1878
18	Cornus_ellipica|scaffold30130	Cornus_florida|C386302	0.0634	0.0018	+-	0.0018	0.0284	+-	0.0117	10.6664
18	Croomia_japonica|scaffold22780	Croomia_paueiflora|C462140	0.1107	0.0068	+-	0.0034	0.0618	+-	0.019	8.968
18	Dysosma_pleiantha|C715664	Dysosma_versipellis|C750128	0.0832	0.0034	+-	0.0024	0.0404	+-	0.0154	2.5943
18	Gelsemium_elegans|C202291	Gelsemium_sempervirens|C257884	0.2345	0.0146	+-	0.0052	0.0625	+-	0.0176	8.9985
18	Hamamelis_japonica|scaffold17213	Hamamelis_vernalis|C313258	0.3776	0.009	+-	0.004	0.0238	+-	0.0107	5.5288
18	Liquidambar_styraciflua|C429826	Liquidambar_formosana|C666956	0.3198	0.009	+-	0.004	0.0282	+-	0.0116	3.6581
18	Meehania_cordata|C244337	Meehania_fargesii|scaffold139	0.4141	0.0186	+-	0.0059	0.045	+-	0.0162	4.4223
18	Penthorum_chinense|C212372	Penthorum_sedoides|C203055	0.2606	0.0036	+-	0.0026	0.0138	+-	0.008	2.8522
18	Phryma_Aleptostachya|C479850	Phryma_leptostachya|C348403	0.1292	0.0036	+-	0.0026	0.028	+-	0.0115	3.5623
18	Sassafras_albidum|C460193	Sassafras_tzumu|scaffold3960	0.3443	0.0075	+-	0.0037	0.0217	+-	0.0098	3.6748
18	Saururus_cernuus|C224730	Saururus_chinensis|scaffold16692	0.1339	0.0093	+-	0.0042	0.0692	+-	0.0185	8.5509
19	Acorus_calamus|C181830	Acorus_gramineus|C269661	0.2502	0.0144	+-	0.0048	0.0576	+-	0.0151	8.5457
19	Calycanthus_chinensis|C379197	Calycanthus_occidentalis|scaffold6814	0.3784	0.0115	+-	0.0041	0.0305	+-	0.0125	4.6742
19	Campsis_grandiflora|scaffold17049	Campsis_radicans|scaffold20545	0.0822	0.0029	+-	0.002	0.035	+-	0.0133	3.0412
19	Cornus_alternifolia|C399356	Cornus_controversa|C402948	0.1214	0.0015	+-	0.0015	0.0125	+-	0.0072	3.2374
19	Cornus_ellipica|C540832	Cornus_florida|C392558	0.3444	0.0151	+-	0.0048	0.0438	+-	0.0141	10.6664
19	Croomia_japonica|C843096	Croomia_paueiflora|scaffold15937	0.2988	0.0176	+-	0.0053	0.059	+-	0.0156	8.968
19	Gelsemium_elegans|C205575	Gelsemium_sempervirens|scaffold10961	0.34	0.0178	+-	0.0052	0.0525	+-	0.016	8.9985
19	Hamamelis_japonica|C377122	Hamamelis_vernalis|C321752	0.4795	0.0094	+-	0.0038	0.0196	+-	0.0088	5.5288
19	Liquidambar_styraciflua|C430253	Liquidambar_formosana|scaffold14779	0.1018	0.0056	+-	0.0028	0.0552	+-	0.0177	3.6581
19	Meehania_cordata|scaffold4522	Meehania_fargesii|scaffold6686	0.1914	0.0044	+-	0.0025	0.023	+-	0.0103	4.4223
19	Menispermum_canadense|C304979	Menispermum_dauricum|C357953	0.1945	0.0089	+-	0.0089	0.0456	+-	0.0328	5.089
19	Penthorum_chinense|C209878	Penthorum_sedoides|C213393	0.1935	0.0044	+-	0.0026	0.0229	+-	0.0103	2.8522
19	Saururus_cernuus|C223162	Saururus_chinensis|C258263	0.3712	0.0077	+-	0.0035	0.0208	+-	0.0094	8.5509
20	Acorus_calamus|C183468	Acorus_gramineus|scaffold11945	0.0436	0.0026	+-	0.0026	0.0601	+-	0.0217	8.5457
20	Calycanthus_chinensis|C381418	Calycanthus_occidentalis|C377382	0.2079	0.0049	+-	0.0035	0.0235	+-	0.0118	4.6742
20	Cornus_alternifolia|scaffold16023	Cornus_controversa|C391014	0.2516	0.0046	+-	0.0033	0.0185	+-	0.0107	3.2374
20	Cornus_ellipica|C524838	Cornus_florida|C378668	0.2464	0.0072	+-	0.0041	0.0291	+-	0.0131	10.6664
20	Cotinus_coggygria|C377797	Cotinus_obovatus|C349698	0.1395	0.0069	+-	0.004	0.0496	+-	0.0178	1.893
20	Croomia_japonica|scaffold30512	Croomia_paueiflora|C457100	0.4546	0.0193	+-	0.0071	0.0425	+-	0.0158	8.968
20	Dysosma_pleiantha|scaffold21185	Dysosma_versipellis|scaffold24697	0.1447	0.0025	+-	0.0025	0.0169	+-	0.0098	2.5943
20	Gelsemium_elegans|C194768	Gelsemium_sempervirens|scaffold12907	0.1844	0.0124	+-	0.0056	0.0671	+-	0.0198	8.9985
20	Hamamelis_japonica|C359614	Hamamelis_vernalis|C305535	0.2257	0.01	+-	0.005	0.0445	+-	0.017	5.5288
20	Nelumbo_lutea|C229785	Nelumbo_nucifera|C269248	0.4186	0.0088	+-	0.0044	0.0211	+-	0.0122	3.3116
20	Penthorum_chinense|scaffold8899	Penthorum_sedoides|C194127	0.143	0.0067	+-	0.0039	0.0467	+-	0.0178	2.8522
20	Phryma_Aleptostachya|C477550	Phryma_leptostachya|C342169	0.1719	0.0049	+-	0.0035	0.0287	+-	0.0129	3.5623
20	Sassafras_albidum|scaffold19903	Sassafras_tzumu|C381334	0.2904	0.0051	+-	0.0036	0.0175	+-	0.0101	3.6748
20	Saururus_cernuus|scaffold12513	Saururus_chinensis|C262214	0.3317	0.0173	+-	0.0065	0.052	+-	0.0176	8.5509
21	Acorus_calamus|C183944	Acorus_gramineus|scaffold11349	0.0617	0.0075	+-	0.0034	0.1219	+-	0.0275	8.5457
21	Campsis_grandiflora|C496135	Campsis_radicans|scaffold7461	0.086	0.0033	+-	0.0024	0.0389	+-	0.0139	3.0412
21	Convallaria_lmajalis|scaffold32835	Convallaria_majalis|C806847	0.2047	0.0041	+-	0.0024	0.0202	+-	0.0102	3.1878
21	Cornus_ellipica|C537164	Cornus_florida|C390360	0.2911	0.0101	+-	0.0038	0.0346	+-	0.0123	10.6664
21	Croomia_japonica|scaffold29429	Croomia_paueiflora|C465042	0.0846	0.0086	+-	0.0035	0.1016	+-	0.0235	8.968
21	Hamamelis_japonica|C374954	Hamamelis_vernalis|C321668	0.0762	0.0029	+-	0.0021	0.0386	+-	0.013	5.5288
21	Liquidambar_styraciflua|C427712	Liquidambar_formosana|scaffold6866	0.1588	0.0058	+-	0.0029	0.0362	+-	0.0129	3.6581
21	Liriodendron_chinense|scaffold24323	Liriodendron_tulipifera|C437773	0.0254	0.0015	+-	0.0015	0.0593	+-	0.0157	1.6912
21	Meehania_cordata|scaffold10678	Meehania_fargesii|C365380	0.1326	0.0098	+-	0.0037	0.0741	+-	0.0195	4.4223
21	Nelumbo_lutea|C246817	Nelumbo_nucifera|scaffold11184	0.1826	0.0056	+-	0.0028	0.0306	+-	0.0117	3.3116
21	Phryma_Aleptostachya|C480406	Phryma_leptostachya|C352225	0.147	0.0078	+-	0.0035	0.0531	+-	0.0151	3.5623
21	Sassafras_albidum|scaffold16378	Sassafras_tzumu|C399854	0.1192	0.0042	+-	0.0024	0.0353	+-	0.0135	3.6748
21	Saururus_cernuus|C223852	Saururus_chinensis|C254911	0.2677	0.0073	+-	0.0033	0.0274	+-	0.0112	8.5509
22	Acorus_calamus|C187749	Acorus_gramineus|C257599	0.1627	0.0175	+-	0.0069	0.1078	+-	0.0316	8.5457
22	Calycanthus_chinensis|C357601	Calycanthus_occidentalis|C348013	0.1622	0.0026	+-	0.0026	0.0159	+-	0.0113	4.6742
22	Cornus_alternifolia|C379526	Cornus_controversa|C389039	0.1879	0.0027	+-	0.0027	0.0142	+-	0.01	3.2374
22	Cornus_ellipica|C515641	Cornus_florida|scaffold13900	0.0755	0.0077	+-	0.0044	0.1017	+-	0.0317	10.6664
22	Croomia_japonica|scaffold33143	Croomia_paueiflora|C452172	0.099	0.0027	+-	0.0027	0.0273	+-	0.0137	8.968
22	Gelsemium_elegans|C195904	Gelsemium_sempervirens|C247501	0.2239	0.0079	+-	0.0046	0.0354	+-	0.0159	8.9985
22	Hamamelis_japonica|C362742	Hamamelis_vernalis|C298697	0.1199	0.005	+-	0.0035	0.0417	+-	0.0188	5.5288
22	Liquidambar_styraciflua|C416127	Liquidambar_formosana|C649732	0.0884	0.0026	+-	0.0026	0.0294	+-	0.0148	3.6581
22	Nelumbo_lutea|C224011	Nelumbo_nucifera|scaffold16337	0.2707	0.0055	+-	0.0039	0.0202	+-	0.0117	3.3116
22	Penthorum_chinense|scaffold8877	Penthorum_sedoides|C193791	0.1226	0.0026	+-	0.0026	0.0214	+-	0.0124	2.8522
22	Phryma_Aleptostachya|C468041	Phryma_leptostachya|C340523	0.4078	0.0073	+-	0.0042	0.0179	+-	0.0127	3.5623
22	Saururus_cernuus|C211665	Saururus_chinensis|C252547	0.4073	0.0055	+-	0.0039	0.0135	+-	0.0096	8.5509
23	Acorus_calamus|C190517	Acorus_gramineus|scaffold12329	0.2163	0.0081	+-	0.0029	0.0376	+-	0.011	8.5457
23	Calycanthus_chinensis|C391608	Calycanthus_occidentalis|scaffold19759	0.0331	0.0009	+-	0.0009	0.0285	+-	0.0101	4.6742
23	Convallaria_lmajalis|scaffold35458	Convallaria_majalis|scaffold20265	0.0967	0.0012	+-	0.0012	0.0127	+-	0.0073	3.1878
23	Cornus_alternifolia|scaffold14342	Cornus_controversa|scaffold18808	0.1285	0.001	+-	0.001	0.0078	+-	0.0045	3.2374
23	Cotinus_coggygria|C375677	Cotinus_obovatus|C353210	0.1962	0.001	+-	0.001	0.0052	+-	0.0037	1.893
23	Croomia_japonica|C850630	Croomia_paueiflora|C469419	0.1628	0.0094	+-	0.0033	0.0578	+-	0.0134	8.968
23	Gelsemium_elegans|scaffold2058	Gelsemium_sempervirens|scaffold15504	0.0453	0.003	+-	0.0018	0.067	+-	0.0145	8.9985
23	Hamamelis_japonica|C381404	Hamamelis_vernalis|scaffold18874	0.0296	0.001	+-	0.001	0.0349	+-	0.0094	5.5288
23	Liriodendron_chinense|scaffold37167	Liriodendron_tulipifera|C445341	0.0312	0.001	+-	0.001	0.0325	+-	0.0095	1.6912
23	Meehania_cordata|C256687	Meehania_fargesii|scaffold9974	0.0355	0.001	+-	0.001	0.0285	+-	0.0091	4.4223
23	Penthorum_chinense|C212408	Penthorum_sedoides|C209915	0.09	0.0025	+-	0.0018	0.0281	+-	0.0107	2.8522
23	Phryma_Aleptostachya|C493214	Phryma_leptostachya|C364341	0.0676	0.001	+-	0.001	0.0151	+-	0.0062	3.5623
23	Sassafras_albidum|scaffold20477	Sassafras_tzumu|scaffold3388	0.0991	0.001	+-	0.001	0.0102	+-	0.0051	3.6748
23	Saururus_cernuus|C229520	Saururus_chinensis|C267418	0.0453	0.0021	+-	0.0015	0.0456	+-	0.0124	8.5509
24	Acorus_calamus|C190907	Acorus_gramineus|C276523	0.0267	0.0009	+-	0.0009	0.0339	+-	0.0092	8.5457
24	Cornus_alternifolia|scaffold22656	Cornus_controversa|C405466	0.0309	0.0009	+-	0.0009	0.0292	+-	0.0085	3.2374
24	Cornus_ellipica|C546990	Cornus_florida|scaffold19650	0.0243	0.0009	+-	0.0009	0.0364	+-	0.0098	10.6664
24	Croomia_japonica|C855524	Croomia_paueiflora|C474351	0.0373	0.0017	+-	0.0012	0.046	+-	0.0117	8.968
24	Dysosma_pleiantha|C730668	Dysosma_versipellis|C762756	0.0682	0.0009	+-	0.0009	0.0128	+-	0.0058	2.5943
24	Gelsemium_elegans|C215399	Gelsemium_sempervirens|C263140	0.024	0.0009	+-	0.0009	0.036	+-	0.0101	8.9985
24	Hamamelis_japonica|C381848	Hamamelis_vernalis|scaffold4665	0.065	0.0035	+-	0.0018	0.054	+-	0.0123	5.5288
24	Liriodendron_chinense|scaffold41977	Liriodendron_tulipifera|C444347	0.0811	0.0014	+-	0.0011	0.0171	+-	0.0063	1.6912
24	Meehania_cordata|C258739	Meehania_fargesii|scaffold18396	0.0122	0.0009	+-	0.0009	0.074	+-	0.0139	4.4223
24	Nelumbo_lutea|C254967	Nelumbo_nucifera|C285330	0.144	0.0026	+-	0.0015	0.0183	+-	0.0069	3.3116
24	Saururus_cernuus|scaffold12529	Saururus_chinensis|scaffold4299	0.0338	0.0009	+-	0.0009	0.0273	+-	0.008	8.5509
25	Acorus_calamus|C192145	Acorus_gramineus|C274069	0.1648	0.0122	+-	0.0038	0.0743	+-	0.0148	8.5457
25	Calycanthus_chinensis|C392410	Calycanthus_occidentalis|C385222	0.1439	0.0029	+-	0.0017	0.0199	+-	0.0067	4.6742
25	Convallaria_lmajalis|scaffold16788	Convallaria_majalis|scaffold44739	0.3788	0.0009	+-	0.0009	0.0024	+-	0.0024	3.1878
25	Cornus_alternifolia|C405350	Cornus_controversa|scaffold21355	0.2522	0.0027	+-	0.0015	0.0105	+-	0.0053	3.2374
25	Cornus_ellipica|C547992	Cornus_florida|C401198	0.2078	0.0091	+-	0.0029	0.0437	+-	0.0108	10.6664
25	Cotinus_coggygria|C376525	Cotinus_obovatus|C353956	0.0595	0.0008	+-	0.0008	0.0138	+-	0.0069	1.893
25	Croomia_japonica|C856124	Croomia_paueiflora|C475743	0.0628	0.0053	+-	0.0022	0.0846	+-	0.0159	8.968
25	Gelsemium_elegans|scaffold6036	Gelsemium_sempervirens|C269876	0.1483	0.0108	+-	0.0031	0.0726	+-	0.0143	8.9985
25	Hamamelis_japonica|scaffold16289	Hamamelis_vernalis|C328285	0.14	0.006	+-	0.0023	0.0429	+-	0.0116	5.5288
25	Liquidambar_styraciflua|scaffold20235	Liquidambar_formosana|scaffold32752	0.205	0.0069	+-	0.0024	0.0334	+-	0.0102	3.6581
25	Meehania_cordata|C258961	Meehania_fargesii|scaffold10301	0.1124	0.0059	+-	0.0022	0.0523	+-	0.0133	4.4223
25	Nelumbo_lutea|C256679	Nelumbo_nucifera|C286726	0.3161	0.0064	+-	0.0024	0.0201	+-	0.0072	3.3116
25	Penthorum_chinense|C222090	Penthorum_sedoides|C212039	0.1707	0.0027	+-	0.0015	0.0157	+-	0.0064	2.8522
25	Phryma_Aleptostachya|C493458	Phryma_leptostachya|C366465	0.072	0.0019	+-	0.0013	0.0259	+-	0.0079	3.5623
25	Sassafras_albidum|C474341	Sassafras_tzumu|C408678	0.0575	0.0026	+-	0.0015	0.0455	+-	0.0115	3.6748
25	Saururus_cernuus|scaffold11253	Saururus_chinensis|C272370	0.1008	0.0044	+-	0.0019	0.0432	+-	0.0114	8.5509
26	Acorus_calamus|C193389	Acorus_gramineus|scaffold10441	0.0588	0.0035	+-	0.002	0.0592	+-	0.0141	8.5457
26	Calycanthus_chinensis|scaffold16553	Calycanthus_occidentalis|C378796	0.1779	0.0032	+-	0.0018	0.0177	+-	0.0089	4.6742
26	Convallaria_lmajalis|scaffold35829	Convallaria_majalis|scaffold45054	0.065	0.0012	+-	0.0012	0.0182	+-	0.0075	3.1878
26	Cornus_alternifolia|scaffold23098	Cornus_controversa|C401640	0.2701	0.0032	+-	0.0019	0.012	+-	0.0069	3.2374
26	Cornus_ellipica|scaffold23745	Cornus_florida|scaffold4590	0.0467	0.0022	+-	0.0016	0.0477	+-	0.0134	10.6664
26	Cotinus_coggygria|scaffold19387	Cotinus_obovatus|C350120	0.0751	0.0012	+-	0.0012	0.0156	+-	0.007	1.893
26	Croomia_japonica|C852176	Croomia_paueiflora|C472913	0.1558	0.0056	+-	0.0025	0.0359	+-	0.0114	8.968
26	Gelsemium_elegans|C211664	Gelsemium_sempervirens|C261604	0.1341	0.0084	+-	0.0032	0.0623	+-	0.0143	8.9985
26	Hamamelis_japonica|C382264	Hamamelis_vernalis|C320328	0.1715	0.0033	+-	0.0019	0.0191	+-	0.0086	5.5288
26	Liquidambar_styraciflua|C434051	Liquidambar_formosana|C665534	0.0509	0.0012	+-	0.0012	0.0227	+-	0.0086	3.6581
26	Meehania_cordata|C252871	Meehania_fargesii|C371914	0.0626	0.0022	+-	0.0015	0.0349	+-	0.0117	4.4223
26	Menispermum_canadense|scaffold38231	Menispermum_dauricum|C677351	0.1331	0.0035	+-	0.002	0.0259	+-	0.0092	5.089
26	Nelumbo_lutea|C251081	Nelumbo_nucifera|C282314	0.1497	0.0023	+-	0.0017	0.0156	+-	0.007	3.3116
26	Penthorum_chinense|C220368	Penthorum_sedoides|C207384	0.0812	0.0034	+-	0.002	0.0419	+-	0.0123	2.8522
26	Phryma_Aleptostachya|C486880	Phryma_leptostachya|C357678	0.0402	0.0022	+-	0.0015	0.0545	+-	0.0148	3.5623
26	Saururus_cernuus|C229912	Saururus_chinensis|scaffold11584	0.0322	0.0022	+-	0.0016	0.0698	+-	0.0165	8.5509
27	Acorus_calamus|scaffold11340	Acorus_gramineus|C267627	0.4424	0.0167	+-	0.0053	0.0379	+-	0.0135	8.5457
27	Calycanthus_chinensis|C375240	Calycanthus_occidentalis|C365137	0.3992	0.0099	+-	0.004	0.0247	+-	0.0102	4.6742
27	Convallaria_lmajalis|scaffold16795	Convallaria_majalis|C809087	0.2049	0.0017	+-	0.0017	0.0082	+-	0.0058	3.1878
27	Cornus_alternifolia|C386298	Cornus_controversa|C390136	0.1962	0.0016	+-	0.0017	0.0084	+-	0.006	3.2374
27	Cotinus_coggygria|C368617	Cotinus_obovatus|C341554	0.204	0.0064	+-	0.0032	0.0316	+-	0.0121	1.893
27	Croomia_japonica|C835570	Croomia_paueiflora|C465400	0.3189	0.0174	+-	0.0053	0.0544	+-	0.0166	8.968
27	Dysosma_pleiantha|scaffold4364	Dysosma_versipellis|scaffold20384	0.1507	0.0033	+-	0.0023	0.0218	+-	0.0109	2.5943
27	Gelsemium_elegans|scaffold12799	Gelsemium_sempervirens|scaffold275	0.1422	0.014	+-	0.0047	0.0984	+-	0.0249	8.9985
27	Hamamelis_japonica|C365406	Hamamelis_vernalis|C312132	0.381	0.0102	+-	0.0042	0.0268	+-	0.0102	5.5288
27	Liquidambar_styraciflua|C427150	Liquidambar_formosana|C659760	0.3928	0.0061	+-	0.0031	0.0156	+-	0.009	3.6581
27	Liriodendron_chinense|scaffold34919	Liriodendron_tulipifera|scaffold18545	0.3234	0.0077	+-	0.0035	0.0239	+-	0.012	1.6912
27	Menispermum_canadense|C536281	Menispermum_dauricum|scaffold42870	0.1892	0.0031	+-	0.0022	0.0166	+-	0.0096	5.089
27	Penthorum_chinense|C203862	Penthorum_sedoides|C197689	0.0658	0.0018	+-	0.0018	0.0276	+-	0.0105	2.8522
27	Phryma_Aleptostachya|C485186	Phryma_leptostachya|C356778	0.1444	0.0034	+-	0.0024	0.0237	+-	0.0098	3.5623
27	Sassafras_albidum|C459347	Sassafras_tzumu|C395604	0.1064	0.0017	+-	0.0017	0.0161	+-	0.0081	3.6748
27	Saururus_cernuus|scaffold13017	Saururus_chinensis|C259453	0.1594	0.0105	+-	0.0041	0.0657	+-	0.0189	8.5509
28	Calycanthus_chinensis|C358193	Calycanthus_occidentalis|C347567	0.2346	0.0055	+-	0.0039	0.0234	+-	0.0136	4.6742
28	Hamamelis_japonica|C359042	Hamamelis_vernalis|scaffold604	0.2074	0.0057	+-	0.0041	0.0276	+-	0.0139	5.5288
28	Liquidambar_styraciflua|C403645	Liquidambar_formosana|scaffold11756	0.2592	0.0137	+-	0.0062	0.053	+-	0.0221	3.6581
28	Penthorum_chinense|C200466	Penthorum_sedoides|C187574	0.0766	0.0026	+-	0.0026	0.0343	+-	0.0173	2.8522
28	Phryma_Aleptostachya|C472224	Phryma_leptostachya|C359269	0.3419	0.0076	+-	0.0044	0.0222	+-	0.0129	3.5623
28	Saururus_cernuus|C219628	Saururus_chinensis|C254061	0.2225	0.0065	+-	0.0046	0.0293	+-	0.0147	8.5509
29	Acorus_calamus|scaffold7537	Acorus_gramineus|C269693	0.1477	0.0052	+-	0.0026	0.035	+-	0.0124	8.5457
29	Campsis_grandiflora|scaffold31059	Campsis_radicans|C353486	0.1512	0.004	+-	0.0023	0.0266	+-	0.0102	3.0412
29	Convallaria_lmajalis|scaffold34643	Convallaria_majalis|scaffold33352	0.2583	0.007	+-	0.0031	0.0271	+-	0.0097	3.1878
29	Cornus_alternifolia|C395610	Cornus_controversa|C397244	0.3014	0.0042	+-	0.0024	0.0139	+-	0.007	3.2374
29	Croomia_japonica|C833270	Croomia_paueiflora|scaffold10782	0.2239	0.0084	+-	0.0035	0.0377	+-	0.0127	8.968
29	Dysosma_pleiantha|scaffold1570	Dysosma_versipellis|scaffold15049	0.0576	0.0013	+-	0.0013	0.0232	+-	0.0095	2.5943
29	Gelsemium_elegans|C206961	Gelsemium_sempervirens|C259266	0.1571	0.0112	+-	0.004	0.0712	+-	0.0164	8.9985
29	Liquidambar_styraciflua|C433621	Liquidambar_formosana|C665562	0.1184	0.0029	+-	0.0021	0.0246	+-	0.0094	3.6581
29	Meehania_cordata|scaffold14759	Meehania_fargesii|scaffold4450	0.0257	0.0014	+-	0.0014	0.0548	+-	0.014	4.4223
29	Menispermum_canadense|scaffold38080	Menispermum_dauricum|C670335	0.0715	0.0064	+-	0.0029	0.0895	+-	0.0205	5.089
29	Penthorum_chinense|scaffold11808	Penthorum_sedoides|C185092	0.1945	0.0057	+-	0.0033	0.0292	+-	0.0121	2.8522
30	Acorus_calamus|scaffold7639	Acorus_gramineus|C249055	0.3639	0.0173	+-	0.0087	0.0475	+-	0.024	8.5457
30	Calycanthus_chinensis|C362766	Calycanthus_occidentalis|C339497	0.062	0.0042	+-	0.0042	0.0674	+-	0.0307	4.6742
30	Convallaria_lmajalis|scaffold31557	Convallaria_majalis|scaffold30691	0.1955	0.0092	+-	0.0065	0.047	+-	0.0273	3.1878
30	Cornus_alternifolia|scaffold19166	Cornus_controversa|C370914	0.3685	0.0042	+-	0.0042	0.0115	+-	0.0115	3.2374
30	Cornus_ellipica|scaffold7397	Cornus_florida|C367376	0.1483	0.0088	+-	0.0062	0.0591	+-	0.0268	10.6664
30	Croomia_japonica|C765943	Croomia_paueiflora|C424811	0.2047	0.0047	+-	0.0047	0.0231	+-	0.0164	8.968
30	Hamamelis_japonica|C358652	Hamamelis_vernalis|scaffold9011	0.1904	0.0128	+-	0.0074	0.0672	+-	0.0305	5.5288
30	Menispermum_canadense|scaffold15712	Menispermum_dauricum|scaffold28494	0.1335	0.0273	+-	0.0112	0.2045	+-	0.0561	5.089
30	Sassafras_albidum|C438497	Sassafras_tzumu|C380734	0.3503	0.0042	+-	0.0042	0.0121	+-	0.0121	3.6748
31	Calycanthus_chinensis|C376228	Calycanthus_occidentalis|C366317	0.1948	0.0078	+-	0.0045	0.04	+-	0.0181	4.6742
31	Campsis_grandiflora|scaffold23158	Campsis_radicans|scaffold19230	0.3185	0.0057	+-	0.004	0.0179	+-	0.0127	3.0412
31	Cornus_alternifolia|C380226	Cornus_controversa|C373807	0.1357	0.0032	+-	0.0032	0.0237	+-	0.0137	3.2374
31	Cornus_ellipica|scaffold29283	Cornus_florida|C368514	0.162	0.016	+-	0.0066	0.099	+-	0.0298	10.6664
31	Croomia_japonica|C815086	Croomia_paueiflora|C454142	0.2714	0.021	+-	0.0086	0.0772	+-	0.0299	8.968
31	Gelsemium_elegans|C206349	Gelsemium_sempervirens|scaffold13432	0.4896	0.0145	+-	0.0065	0.0297	+-	0.015	8.9985
31	Hamamelis_japonica|C365695	Hamamelis_vernalis|C306753	0.4889	0.0138	+-	0.0062	0.0282	+-	0.0164	5.5288
31	Liquidambar_styraciflua|C429822	Liquidambar_formosana|scaffold28083	0.3036	0.0072	+-	0.0042	0.0236	+-	0.0137	3.6581
31	Liriodendron_chinense|scaffold43545	Liriodendron_tulipifera|C421181	0.1856	0.0028	+-	0.0028	0.0153	+-	0.0108	1.6912
31	Meehania_cordata|C237927	Meehania_fargesii|C357478	0.0965	0.0056	+-	0.0039	0.0575	+-	0.0221	4.4223
31	Penthorum_chinense|scaffold8836	Penthorum_sedoides|C194541	0.2166	0.0103	+-	0.0052	0.0477	+-	0.0184	2.8522
31	Phryma_Aleptostachya|C473414	Phryma_leptostachya|C342667	0.3357	0.0075	+-	0.0043	0.0224	+-	0.013	3.5623
32	Calycanthus_chinensis|C380726	Calycanthus_occidentalis|C370847	0.3697	0.0058	+-	0.0033	0.0157	+-	0.0091	4.6742
32	Convallaria_lmajalis|C659484	Convallaria_majalis|C808709	0.1254	0.0033	+-	0.0024	0.0266	+-	0.011	3.1878
32	Cornus_alternifolia|C399288	Cornus_controversa|C401230	0.1116	0.0017	+-	0.0017	0.0154	+-	0.0089	3.2374
32	Cornus_ellipica|C533678	Cornus_florida|C393930	0.1528	0.007	+-	0.0035	0.0457	+-	0.0155	10.6664
32	Croomia_japonica|scaffold20279	Croomia_paueiflora|C462476	0.1256	0.0075	+-	0.0036	0.0599	+-	0.0187	8.968
32	Dysosma_pleiantha|scaffold12354	Dysosma_versipellis|C745627	0.403	0.0038	+-	0.0027	0.0094	+-	0.0067	2.5943
32	Gelsemium_elegans|scaffold12790	Gelsemium_sempervirens|C263262	0.4971	0.025	+-	0.0076	0.0503	+-	0.018	8.9985
32	Hamamelis_japonica|C377140	Hamamelis_vernalis|scaffold16968	0.4222	0.0109	+-	0.0045	0.0258	+-	0.0116	5.5288
32	Liquidambar_styraciflua|C426344	Liquidambar_formosana|C654666	0.1538	0.009	+-	0.004	0.0585	+-	0.0198	3.6581
32	Liriodendron_chinense|scaffold39383	Liriodendron_tulipifera|C427901	0.2012	0.0021	+-	0.0021	0.0105	+-	0.0074	1.6912
32	Menispermum_canadense|C538929	Menispermum_dauricum|scaffold22976	0.0365	0.0019	+-	0.0019	0.0528	+-	0.017	5.089
32	Penthorum_chinense|C210906	Penthorum_sedoides|C202933	0.4598	0.0095	+-	0.0043	0.0207	+-	0.0104	2.8522
32	Phryma_Aleptostachya|C484618	Phryma_leptostachya|C353265	0.1682	0.0071	+-	0.0036	0.0424	+-	0.0152	3.5623
32	Sassafras_albidum|C452823	Sassafras_tzumu|C393246	0.4269	0.0041	+-	0.0029	0.0096	+-	0.0068	3.6748
32	Saururus_cernuus|C220476	Saururus_chinensis|C256151	0.1356	0.0038	+-	0.0027	0.028	+-	0.0115	8.5509
33	Acorus_calamus|C135770	Acorus_gramineus|C219315	0.4623	0.0123	+-	0.0087	0.0267	+-	0.0189	8.5457
33	Campsis_grandiflora|C451100	Campsis_radicans|scaffold16406	0.4482	0.0062	+-	0.0062	0.0139	+-	0.0139	3.0412
33	Croomia_japonica|scaffold20658	Croomia_paueiflora|C434122	0.087	0.0056	+-	0.0056	0.0644	+-	0.0295	8.968
33	Hamamelis_japonica|C335465	Hamamelis_vernalis|C278930	0.2211	0.0057	+-	0.0057	0.0258	+-	0.0183	5.5288
33	Nelumbo_lutea|C201479	Nelumbo_nucifera|scaffold6538	0.1884	0.0059	+-	0.0059	0.0315	+-	0.0225	3.3116
33	Sassafras_albidum|C398178	Sassafras_tzumu|C331612	0.4821	0.0117	+-	0.0083	0.0244	+-	0.0173	3.6748
34	Calycanthus_chinensis|C379353	Calycanthus_occidentalis|C370253	0.1838	0.0056	+-	0.0032	0.0304	+-	0.0125	4.6742
34	Campsis_grandiflora|scaffold31177	Campsis_radicans|scaffold15952	0.0565	0.0018	+-	0.0018	0.0313	+-	0.0112	3.0412
34	Cornus_alternifolia|C397366	Cornus_controversa|C398956	0.0986	0.0016	+-	0.0016	0.0159	+-	0.0092	3.2374
34	Cornus_ellipica|scaffold27753	Cornus_florida|scaffold7779	0.1541	0.0123	+-	0.0046	0.0795	+-	0.0187	10.6664
34	Dysosma_pleiantha|C725058	Dysosma_versipellis|C753370	0.4311	0.0034	+-	0.0024	0.0078	+-	0.0055	2.5943
34	Gelsemium_elegans|C203753	Gelsemium_sempervirens|C256592	0.2478	0.0066	+-	0.0033	0.0265	+-	0.0109	8.9985
34	Hamamelis_japonica|scaffold17636	Hamamelis_vernalis|C313186	0.2225	0.0067	+-	0.0034	0.0303	+-	0.0115	5.5288
34	Liquidambar_styraciflua|scaffold21449	Liquidambar_formosana|scaffold29783	0.0472	0.0017	+-	0.0017	0.037	+-	0.0125	3.6581
34	Liriodendron_chinense|C815271	Liriodendron_tulipifera|scaffold22462	0.1181	0.0015	+-	0.0015	0.013	+-	0.0076	1.6912
34	Meehania_cordata|scaffold9451	Meehania_fargesii|scaffold12599	0.0797	0.0034	+-	0.0024	0.0429	+-	0.0138	4.4223
34	Penthorum_chinense|C208374	Penthorum_sedoides|C195897	0.0749	0.0019	+-	0.0019	0.026	+-	0.0131	2.8522
34	Phryma_Aleptostachya|C476880	Phryma_leptostachya|C350319	0.2669	0.0084	+-	0.0038	0.0316	+-	0.012	3.5623
34	Saururus_cernuus|C228312	Saururus_chinensis|C259225	0.1254	0.006	+-	0.0035	0.0478	+-	0.0162	8.5509
35	Gelsemium_elegans|C189879	Gelsemium_sempervirens|C244109	0.3863	0.0277	+-	0.0093	0.0718	+-	0.0247	8.9985
36	Acorus_calamus|C166089	Acorus_gramineus|scaffold15090	0.1463	0.006	+-	0.0043	0.041	+-	0.017	8.5457
36	Calycanthus_chinensis|scaffold171	Calycanthus_occidentalis|scaffold2538	0.3556	0.0075	+-	0.0075	0.021	+-	0.0211	4.6742
36	Cornus_ellipica|scaffold22053	Cornus_florida|C369812	0.0626	0.0038	+-	0.0038	0.0605	+-	0.0275	10.6664
36	Cotinus_coggygria|scaffold726	Cotinus_obovatus|scaffold3404	0.2659	0.007	+-	0.004	0.0263	+-	0.0132	1.893
36	Liquidambar_styraciflua|C407309	Liquidambar_formosana|scaffold7179	0.3938	0.0166	+-	0.0063	0.0422	+-	0.0161	3.6581
36	Meehania_cordata|C237705	Meehania_fargesii|C353462	0.3989	0.0151	+-	0.0062	0.0379	+-	0.0156	4.4223
36	Menispermum_canadense|C531103	Menispermum_dauricum|scaffold23965	0.2969	0.0093	+-	0.0047	0.0315	+-	0.013	5.089
36	Nelumbo_lutea|C220777	Nelumbo_nucifera|C260084	0.4053	0.0086	+-	0.005	0.0212	+-	0.0123	3.3116
36	Penthorum_chinense|scaffold10154	Penthorum_sedoides|C202123	0.3426	0.0085	+-	0.0049	0.0249	+-	0.0145	2.8522
36	Saururus_cernuus|scaffold12243	Saururus_chinensis|scaffold16022	0.1767	0.0065	+-	0.0037	0.0365	+-	0.0184	8.5509
37	Acorus_calamus|C168887	Acorus_gramineus|scaffold11250	0.0223	0.0053	+-	0.003	0.237	+-	0.0545	8.5457
37	Calycanthus_chinensis|scaffold10278	Calycanthus_occidentalis|scaffold15093	0.0879	0.0029	+-	0.0017	0.0326	+-	0.0117	4.6742
37	Campsis_grandiflora|scaffold25553	Campsis_radicans|C360198	0.0855	0.0028	+-	0.002	0.0331	+-	0.0118	3.0412
37	Cornus_ellipica|scaffold21502	Cornus_florida|C396076	0.0854	0.0053	+-	0.0024	0.0616	+-	0.0152	10.6664
37	Cotinus_coggygria|scaffold16147	Cotinus_obovatus|C350852	0.1135	0.0063	+-	0.0026	0.0556	+-	0.0146	1.893
37	Croomia_japonica|C839772	Croomia_paueiflora|C462532	0.1168	0.0092	+-	0.0035	0.0785	+-	0.0209	8.968
37	Dysosma_pleiantha|scaffold10659	Dysosma_versipellis|scaffold27447	0.3822	0.0014	+-	0.0014	0.0037	+-	0.0037	2.5943
37	Gelsemium_elegans|C211156	Gelsemium_sempervirens|C261944	0.1608	0.0136	+-	0.0039	0.0846	+-	0.0172	8.9985
37	Liquidambar_styraciflua|C437883	Liquidambar_formosana|scaffold31113	0.0746	0.0032	+-	0.0018	0.0422	+-	0.0123	3.6581
37	Meehania_cordata|C253901	Meehania_fargesii|C369130	0.0469	0.0011	+-	0.0011	0.0231	+-	0.0088	4.4223
37	Penthorum_chinense|C217698	Penthorum_sedoides|C208287	0.1489	0.0022	+-	0.0015	0.0145	+-	0.0065	2.8522
37	Phryma_Aleptostachya|C490040	Phryma_leptostachya|C360085	0.1125	0.003	+-	0.0017	0.0264	+-	0.0108	3.5623
37	Sassafras_albidum|C473111	Sassafras_tzumu|C405644	0.0728	0.0011	+-	0.0011	0.0149	+-	0.0067	3.6748
37	Saururus_cernuus|scaffold11935	Saururus_chinensis|scaffold17072	0.1479	0.0066	+-	0.0026	0.0445	+-	0.0127	8.5509
38	Acorus_calamus|C171164	Acorus_gramineus|C253937	0.0898	0.0063	+-	0.0045	0.0705	+-	0.0242	8.5457
38	Cornus_alternifolia|C379168	Cornus_controversa|C377983	0.1385	0.0032	+-	0.0032	0.0233	+-	0.0135	3.2374
38	Cotinus_coggygria|C364819	Cotinus_obovatus|C338073	0.1897	0.0031	+-	0.0031	0.0161	+-	0.0114	1.893
38	Croomia_japonica|C821912	Croomia_paueiflora|scaffold17609	0.2574	0.0197	+-	0.0075	0.0764	+-	0.0262	8.968
38	Gelsemium_elegans|C201875	Gelsemium_sempervirens|scaffold3332	0.1689	0.0117	+-	0.0059	0.0694	+-	0.0248	8.9985
38	Liquidambar_styraciflua|C422880	Liquidambar_formosana|scaffold30821	0.2385	0.0087	+-	0.005	0.0365	+-	0.0184	3.6581
38	Menispermum_canadense|C528555	Menispermum_dauricum|C675613	0.3969	0.003	+-	0.003	0.0076	+-	0.0077	5.089
38	Nelumbo_lutea|C230209	Nelumbo_nucifera|C265210	0.4172	0.0031	+-	0.0031	0.0075	+-	0.0075	3.3116
38	Sassafras_albidum|scaffold5652	Sassafras_tzumu|C374624	0.0827	0.0031	+-	0.0031	0.0373	+-	0.0168	3.6748
38	Saururus_cernuus|scaffold12775	Saururus_chinensis|C245027	0.0595	0.0073	+-	0.0052	0.1235	+-	0.0358	8.5509
39	Acorus_calamus|C175440	Acorus_gramineus|scaffold16457	0.0729	0.0043	+-	0.003	0.0585	+-	0.0187	8.5457
39	Calycanthus_chinensis|C371188	Calycanthus_occidentalis|C361747	0.4619	0.0124	+-	0.0056	0.0269	+-	0.0135	4.6742
39	Campsis_grandiflora|scaffold14036	Campsis_radicans|scaffold14255	0.0524	0.0022	+-	0.0022	0.0423	+-	0.0163	3.0412
39	Convallaria_lmajalis|C652964	Convallaria_majalis|C803091	0.0865	0.002	+-	0.002	0.0226	+-	0.0113	3.1878
39	Cornus_alternifolia|C386720	Cornus_controversa|C388249	0.1303	0.0039	+-	0.0028	0.03	+-	0.0124	3.2374
39	Cornus_ellipica|C526314	Cornus_florida|C383274	0.1934	0.0076	+-	0.0038	0.0394	+-	0.015	10.6664
39	Croomia_japonica|C835890	Croomia_paueiflora|C260785	0.0242	0.0465	+-	0.0177	1.9257	+-	0.7914	8.968
39	Dysosma_pleiantha|C713098	Dysosma_versipellis|C746647	0.3478	0.0038	+-	0.0027	0.0109	+-	0.0077	2.5943
39	Gelsemium_elegans|C201381	Gelsemium_sempervirens|scaffold8659	0.2966	0.0174	+-	0.0057	0.0585	+-	0.0193	8.9985
39	Hamamelis_japonica|C363768	Hamamelis_vernalis|scaffold10947	0.1364	0.0075	+-	0.0037	0.0547	+-	0.0186	5.5288
39	Liquidambar_styraciflua|C419034	Liquidambar_formosana|scaffold23382	0.1919	0.0076	+-	0.0038	0.0396	+-	0.0151	3.6581
39	Meehania_cordata|C245909	Meehania_fargesii|scaffold821	0.1693	0.0038	+-	0.0027	0.0226	+-	0.0114	4.4223
39	Menispermum_canadense|C533539	Menispermum_dauricum|scaffold9588	0.2696	0.0041	+-	0.0029	0.0154	+-	0.0089	5.089
39	Nelumbo_lutea|C236339	Nelumbo_nucifera|C267004	0.2727	0.0058	+-	0.0034	0.0212	+-	0.0107	3.3116
39	Phryma_Aleptostachya|C478654	Phryma_leptostachya|C349919	0.0986	0.0037	+-	0.0026	0.0378	+-	0.0156	3.5623
39	Sassafras_albidum|scaffold10505	Sassafras_tzumu|C389412	0.1188	0.0041	+-	0.0029	0.0349	+-	0.0144	3.6748
40	Calycanthus_chinensis|C374352	Calycanthus_occidentalis|scaffold10339	0.2765	0.0075	+-	0.0037	0.027	+-	0.0136	4.6742
40	Campsis_grandiflora|C491469	Campsis_radicans|scaffold22440	0.4186	0.0041	+-	0.0029	0.0098	+-	0.007	3.0412
40	Cornus_alternifolia|C389348	Cornus_controversa|scaffold12210	0.1346	0.0073	+-	0.0037	0.0544	+-	0.0195	3.2374
40	Cornus_ellipica|scaffold15366	Cornus_florida|C375924	0.1806	0.0116	+-	0.0047	0.0642	+-	0.0197	10.6664
40	Croomia_japonica|C796738	Croomia_paueiflora|C440578	0.1774	0.0037	+-	0.0037	0.0208	+-	0.0148	8.968
40	Liquidambar_styraciflua|scaffold9926	Liquidambar_formosana|C653766	0.3604	0.0166	+-	0.0059	0.0461	+-	0.0157	3.6581
40	Liriodendron_chinense|C814753	Liriodendron_tulipifera|C434082	0.1682	0.0043	+-	0.003	0.0253	+-	0.0114	1.6912
40	Meehania_cordata|C244723	Meehania_fargesii|C363466	0.1501	0.0125	+-	0.0049	0.0834	+-	0.0244	4.4223
40	Saururus_cernuus|C215952	Saururus_chinensis|C252039	0.3553	0.0123	+-	0.005	0.0346	+-	0.0142	8.5509
41	Acorus_calamus|C179870	Acorus_gramineus|C266795	0.3239	0.0177	+-	0.0051	0.0548	+-	0.0162	8.5457
41	Calycanthus_chinensis|C382618	Calycanthus_occidentalis|C374750	0.2596	0.01	+-	0.0038	0.0386	+-	0.0123	4.6742
41	Cornus_alternifolia|scaffold22003	Cornus_controversa|scaffold15579	0.1888	0.0116	+-	0.0039	0.0613	+-	0.0173	3.2374
41	Cornus_ellipica|scaffold9710	Cornus_florida|C391104	0.4199	0.0158	+-	0.0048	0.0376	+-	0.0115	10.6664
41	Croomia_japonica|C840042	Croomia_paueiflora|C476387	0.4424	0.0207	+-	0.006	0.0469	+-	0.015	8.968
41	Dysosma_pleiantha|C718738	Dysosma_versipellis|C743305	0.0684	0.0015	+-	0.0015	0.0217	+-	0.0098	2.5943
41	Hamamelis_japonica|scaffold20636	Hamamelis_vernalis|scaffold18199	0.162	0.008	+-	0.0033	0.0492	+-	0.0144	5.5288
41	Liquidambar_styraciflua|scaffold18656	Liquidambar_formosana|C656906	0.332	0.0056	+-	0.0028	0.0169	+-	0.0076	3.6581
41	Menispermum_canadense|scaffold28145	Menispermum_dauricum|scaffold36263	0.1721	0.0014	+-	0.0014	0.0079	+-	0.0056	5.089
41	Nelumbo_lutea|C247161	Nelumbo_nucifera|C281430	0.1956	0.004	+-	0.0023	0.0203	+-	0.0091	3.3116
41	Penthorum_chinense|C214992	Penthorum_sedoides|C210085	0.1163	0.0033	+-	0.0021	0.0283	+-	0.0113	2.8522
41	Sassafras_albidum|C463859	Sassafras_tzumu|C396114	0.132	0.0016	+-	0.0016	0.0119	+-	0.0069	3.6748
42	Acorus_calamus|C180368	Acorus_gramineus|C270061	0.0331	0.0038	+-	0.0022	0.1138	+-	0.0316	8.5457
42	Calycanthus_chinensis|C386040	Calycanthus_occidentalis|C374920	0.0687	0.0031	+-	0.0022	0.0458	+-	0.0146	4.6742
42	Dysosma_pleiantha|C727468	Dysosma_versipellis|C759700	0.1376	0.0014	+-	0.0014	0.0104	+-	0.006	2.5943
42	Gelsemium_elegans|scaffold6694	Gelsemium_sempervirens|scaffold15513	0.2067	0.01	+-	0.0038	0.0486	+-	0.0132	8.9985
42	Hamamelis_japonica|scaffold17480	Hamamelis_vernalis|C318002	0.0523	0.0028	+-	0.002	0.0535	+-	0.0141	5.5288
42	Liquidambar_styraciflua|scaffold17202	Liquidambar_formosana|scaffold30552	0.0302	0.0014	+-	0.0014	0.0449	+-	0.0131	3.6581
42	Meehania_cordata|C250919	Meehania_fargesii|scaffold18487	0.1063	0.0067	+-	0.003	0.0626	+-	0.0201	4.4223
42	Penthorum_chinense|C209938	Penthorum_sedoides|C202109	0.1158	0.0029	+-	0.002	0.0249	+-	0.0102	2.8522
42	Phryma_Aleptostachya|C483178	Phryma_leptostachya|C355754	0.0751	0.0056	+-	0.0028	0.0744	+-	0.018	3.5623
42	Sassafras_albidum|scaffold22451	Sassafras_tzumu|C402320	0.0333	0.0013	+-	0.0013	0.0388	+-	0.014	3.6748
43	Acorus_calamus|C180538	Acorus_gramineus|scaffold16396	0.1827	0.0094	+-	0.0042	0.0512	+-	0.0157	8.5457
43	Calycanthus_chinensis|C380870	Calycanthus_occidentalis|C376412	0.2168	0.0057	+-	0.0033	0.0262	+-	0.0108	4.6742
43	Campsis_grandiflora|C489343	Campsis_radicans|scaffold18282	0.1843	0.0056	+-	0.0032	0.0302	+-	0.0124	3.0412
43	Convallaria_lmajalis|C645852	Convallaria_majalis|scaffold26059	0.1054	0.0036	+-	0.0026	0.0345	+-	0.0132	3.1878
43	Cornus_alternifolia|C394590	Cornus_controversa|C400756	0.1781	0.0053	+-	0.003	0.0296	+-	0.0122	3.2374
43	Cornus_ellipica|C531376	Cornus_florida|C387276	0.1515	0.0072	+-	0.0036	0.0474	+-	0.0153	10.6664
43	Cotinus_coggygria|C367721	Cotinus_obovatus|C343708	0.2069	0.0034	+-	0.0024	0.0164	+-	0.0095	1.893
43	Croomia_japonica|scaffold34472	Croomia_paueiflora|scaffold7967	0.2181	0.0109	+-	0.0049	0.0499	+-	0.018	8.968
43	Dysosma_pleiantha|scaffold27827	Dysosma_versipellis|scaffold21335	0.2957	0.0056	+-	0.0032	0.019	+-	0.0095	2.5943
43	Gelsemium_elegans|C206127	Gelsemium_sempervirens|scaffold1938	0.2034	0.0119	+-	0.0048	0.0583	+-	0.0187	8.9985
43	Hamamelis_japonica|C379116	Hamamelis_vernalis|C316072	0.4166	0.0091	+-	0.0041	0.0219	+-	0.0098	5.5288
43	Liquidambar_styraciflua|C429302	Liquidambar_formosana|C662538	0.1264	0.0036	+-	0.0025	0.0282	+-	0.0116	3.6581
43	Meehania_cordata|C249617	Meehania_fargesii|scaffold12998	0.3977	0.0073	+-	0.0036	0.0182	+-	0.0091	4.4223
43	Nelumbo_lutea|C242779	Nelumbo_nucifera|C278600	0.0782	0.0033	+-	0.0023	0.0421	+-	0.016	3.3116
43	Penthorum_chinense|C208982	Penthorum_sedoides|C201233	0.3499	0.0037	+-	0.0026	0.0105	+-	0.0074	2.8522
43	Phryma_Aleptostachya|C482440	Phryma_leptostachya|C350595	0.1755	0.0067	+-	0.0033	0.038	+-	0.0156	3.5623
43	Sassafras_albidum|scaffold14503	Sassafras_tzumu|C400982	0.1475	0.0036	+-	0.0026	0.0247	+-	0.0112	3.6748
43	Saururus_cernuus|C226538	Saururus_chinensis|C258037	0.241	0.0109	+-	0.0045	0.0454	+-	0.0145	8.5509
44	Acorus_calamus|C181438	Acorus_gramineus|scaffold15292	0.1269	0.0092	+-	0.0038	0.0724	+-	0.0182	8.5457
44	Calycanthus_chinensis|C378993	Calycanthus_occidentalis|scaffold12424	0.1761	0.0043	+-	0.0025	0.0243	+-	0.0109	4.6742
44	Campsis_grandiflora|scaffold32345	Campsis_radicans|C351622	0.1319	0.0015	+-	0.0015	0.0116	+-	0.0067	3.0412
44	Cornus_ellipica|scaffold25063	Cornus_florida|C385830	0.1601	0.0029	+-	0.0021	0.0182	+-	0.0092	10.6664
44	Cotinus_coggygria|scaffold13623	Cotinus_obovatus|C343162	0.2024	0.0015	+-	0.0015	0.0076	+-	0.0054	1.893
44	Croomia_japonica|scaffold37194	Croomia_paueiflora|C466506	0.2659	0.0112	+-	0.004	0.0423	+-	0.0151	8.968
44	Gelsemium_elegans|C202893	Gelsemium_sempervirens|C253316	0.105	0.0068	+-	0.0031	0.0652	+-	0.0201	8.9985
44	Hamamelis_japonica|C370760	Hamamelis_vernalis|scaffold10819	0.0692	0.0033	+-	0.0023	0.0478	+-	0.0131	5.5288
44	Liquidambar_styraciflua|C430317	Liquidambar_formosana|scaffold21642	0.0422	0.0043	+-	0.0025	0.1008	+-	0.024	3.6581
44	Liriodendron_chinense|scaffold37686	Liriodendron_tulipifera|scaffold9409	0.0758	0.003	+-	0.0021	0.0392	+-	0.0133	1.6912
44	Meehania_cordata|C249209	Meehania_fargesii|C363894	0.0351	0.0014	+-	0.0014	0.0403	+-	0.0144	4.4223
44	Menispermum_canadense|scaffold18122	Menispermum_dauricum|scaffold34449	0.2504	0.0064	+-	0.0045	0.0255	+-	0.0148	5.089
44	Penthorum_chinense|C214264	Penthorum_sedoides|C201629	0.1244	0.0046	+-	0.0026	0.0367	+-	0.0124	2.8522
44	Phryma_Aleptostachya|C479294	Phryma_leptostachya|C352713	0.2074	0.0064	+-	0.0032	0.031	+-	0.0111	3.5623
44	Sassafras_albidum|C465713	Sassafras_tzumu|C399342	0.1021	0.0029	+-	0.002	0.0281	+-	0.0116	3.6748
44	Saururus_cernuus|scaffold13571	Saururus_chinensis|C262588	0.39	0.0077	+-	0.0034	0.0197	+-	0.0089	8.5509
45	Acorus_calamus|C181596	Acorus_gramineus|scaffold3898	0.2199	0.0053	+-	0.003	0.0239	+-	0.0108	8.5457
45	Calycanthus_chinensis|C378833	Calycanthus_occidentalis|scaffold18718	0.1885	0.0052	+-	0.003	0.0275	+-	0.0114	4.6742
45	Cornus_ellipica|C537926	Cornus_florida|C371680	0.4917	0.0112	+-	0.0048	0.0229	+-	0.0123	10.6664
45	Croomia_japonica|C845370	Croomia_paueiflora|scaffold18927	0.2668	0.0172	+-	0.0055	0.0645	+-	0.0184	8.968
45	Gelsemium_elegans|C212032	Gelsemium_sempervirens|scaffold8145	0.4063	0.0072	+-	0.0036	0.0178	+-	0.0089	8.9985
45	Hamamelis_japonica|scaffold17110	Hamamelis_vernalis|C318532	0.3692	0.0068	+-	0.0034	0.0185	+-	0.0093	5.5288
45	Liquidambar_styraciflua|C423074	Liquidambar_formosana|C655002	0.3277	0.0087	+-	0.0039	0.0266	+-	0.0109	3.6581
45	Meehania_cordata|C252931	Meehania_fargesii|scaffold15125	0.2184	0.0066	+-	0.0033	0.0303	+-	0.0124	4.4223
45	Penthorum_chinense|C211562	Penthorum_sedoides|C201593	0.1887	0.0017	+-	0.0017	0.0091	+-	0.0065	2.8522
45	Phryma_Aleptostachya|scaffold18209	Phryma_leptostachya|C363801	0.1773	0.0017	+-	0.0017	0.0096	+-	0.0068	3.5623
45	Sassafras_albidum|C459329	Sassafras_tzumu|C314012	0.231	0.0135	+-	0.0078	0.0583	+-	0.0266	3.6748
45	Saururus_cernuus|C222876	Saururus_chinensis|scaffold3822	0.3523	0.006	+-	0.0043	0.017	+-	0.0121	8.5509
46	Acorus_calamus|C181708	Acorus_gramineus|scaffold15456	0.1407	0.0113	+-	0.0057	0.0806	+-	0.0249	8.5457
46	Calycanthus_chinensis|C382022	Calycanthus_occidentalis|C373110	0.2019	0.0054	+-	0.0038	0.0267	+-	0.0135	4.6742
46	Campsis_grandiflora|scaffold1994	Campsis_radicans|scaffold22921	0.3335	0.011	+-	0.0049	0.0331	+-	0.0136	3.0412
46	Cornus_alternifolia|scaffold6023	Cornus_controversa|C395596	0.2162	0.0065	+-	0.0037	0.03	+-	0.0135	3.2374
46	Cornus_ellipica|scaffold17015	Cornus_florida|C389726	0.2133	0.011	+-	0.0047	0.0518	+-	0.018	10.6664
46	Cotinus_coggygria|C367713	Cotinus_obovatus|C340666	0.2854	0.0084	+-	0.0042	0.0293	+-	0.0121	1.893
46	Dysosma_pleiantha|C719696	Dysosma_versipellis|scaffold21042	0.3653	0.0072	+-	0.0036	0.0198	+-	0.0099	2.5943
46	Gelsemium_elegans|C204193	Gelsemium_sempervirens|C255452	0.3071	0.0238	+-	0.0069	0.0774	+-	0.0201	8.9985
46	Hamamelis_japonica|C370982	Hamamelis_vernalis|C310868	0.4618	0.013	+-	0.0049	0.0281	+-	0.0116	5.5288
46	Liquidambar_styraciflua|C429224	Liquidambar_formosana|C654896	0.4823	0.0196	+-	0.0062	0.0406	+-	0.0137	3.6581
46	Liriodendron_chinense|scaffold35987	Liriodendron_tulipifera|scaffold16275	0.3861	0.0023	+-	0.0023	0.006	+-	0.006	1.6912
46	Meehania_cordata|scaffold15223	Meehania_fargesii|C353990	0.1755	0.0058	+-	0.0041	0.0332	+-	0.0168	4.4223
46	Penthorum_chinense|C212534	Penthorum_sedoides|C201071	0.3741	0.0056	+-	0.004	0.015	+-	0.0106	2.8522
46	Phryma_Aleptostachya|C481446	Phryma_leptostachya|C355880	0.3566	0.0074	+-	0.0037	0.0206	+-	0.0104	3.5623
47	Calycanthus_chinensis|C384134	Calycanthus_occidentalis|scaffold11977	0.1126	0.0016	+-	0.0016	0.0146	+-	0.0066	4.6742
47	Cornus_alternifolia|scaffold23389	Cornus_controversa|C401040	0.1497	0.0015	+-	0.0015	0.0097	+-	0.0056	3.2374
47	Cornus_ellipica|C540356	Cornus_florida|C394932	0.3826	0.0087	+-	0.0036	0.0229	+-	0.0087	10.6664
47	Croomia_japonica|scaffold37581	Croomia_paueiflora|scaffold13621	0.0731	0.005	+-	0.0029	0.0678	+-	0.0151	8.968
47	Dysosma_pleiantha|C722894	Dysosma_versipellis|scaffold28646	0.1245	0.0015	+-	0.0015	0.0121	+-	0.0061	2.5943
47	Hamamelis_japonica|C375576	Hamamelis_vernalis|C317760	0.1697	0.0027	+-	0.0019	0.016	+-	0.0072	5.5288
47	Meehania_cordata|C244381	Meehania_fargesii|scaffold14784	0.1066	0.0029	+-	0.0021	0.0274	+-	0.0098	4.4223
47	Nelumbo_lutea|C248559	Nelumbo_nucifera|scaffold5961	0.209	0.0041	+-	0.0024	0.0196	+-	0.008	3.3116
47	Phryma_Aleptostachya|C486830	Phryma_leptostachya|C357616	0.1451	0.0028	+-	0.002	0.0193	+-	0.0079	3.5623
47	Sassafras_albidum|scaffold5790	Sassafras_tzumu|C400252	0.0359	0.0013	+-	0.0013	0.0372	+-	0.0113	3.6748
47	Saururus_cernuus|scaffold9282	Saururus_chinensis|C263272	0.1343	0.0055	+-	0.0028	0.0412	+-	0.012	8.5509
48	Acorus_calamus|C183568	Acorus_gramineus|C269995	0.0364	0.0036	+-	0.0025	0.0987	+-	0.0227	8.5457
48	Calycanthus_chinensis|C370886	Calycanthus_occidentalis|C369879	0.0719	0.0018	+-	0.0018	0.0254	+-	0.0104	4.6742
48	Cornus_alternifolia|C397874	Cornus_controversa|scaffold18092	0.4055	0.0054	+-	0.0031	0.0132	+-	0.0076	3.2374
48	Cotinus_coggygria|C361883	Cotinus_obovatus|C348262	0.2128	0.0088	+-	0.004	0.0416	+-	0.014	1.893
48	Gelsemium_elegans|C211464	Gelsemium_sempervirens|C257538	0.1605	0.0089	+-	0.004	0.0554	+-	0.0162	8.9985
48	Hamamelis_japonica|C358578	Hamamelis_vernalis|C284433	0.0617	0.0025	+-	0.0025	0.04	+-	0.0165	5.5288
48	Liquidambar_styraciflua|C432749	Liquidambar_formosana|C668382	0.174	0.0054	+-	0.0031	0.0309	+-	0.0118	3.6581
48	Meehania_cordata|C243747	Meehania_fargesii|scaffold3762	0.0504	0.0069	+-	0.0034	0.1361	+-	0.0287	4.4223
48	Phryma_Aleptostachya|C475526	Phryma_leptostachya|C349591	0.062	0.0036	+-	0.0026	0.0582	+-	0.0166	3.5623
48	Sassafras_albidum|scaffold8174	Sassafras_tzumu|C400148	0.0661	0.0023	+-	0.0023	0.0345	+-	0.0142	3.6748
49	Acorus_calamus|C183988	Acorus_gramineus|scaffold13978	0.0886	0.0035	+-	0.0025	0.0391	+-	0.0139	8.5457
49	Calycanthus_chinensis|scaffold6134	Calycanthus_occidentalis|scaffold16822	0.2776	0.0032	+-	0.0023	0.0117	+-	0.0083	4.6742
49	Campsis_grandiflora|C491381	Campsis_radicans|C358182	0.0951	0.0035	+-	0.0025	0.0368	+-	0.014	3.0412
49	Cornus_alternifolia|C382708	Cornus_controversa|C391212	0.1234	0.0019	+-	0.0019	0.0157	+-	0.0091	3.2374
49	Cornus_ellipica|C527862	Cornus_florida|C333441	0.0596	0.004	+-	0.004	0.0674	+-	0.0342	10.6664
49	Croomia_japonica|scaffold24766	Croomia_paueiflora|C475633	0.2218	0.0134	+-	0.0047	0.0602	+-	0.0196	8.968
49	Dysosma_pleiantha|C720480	Dysosma_versipellis|C756360	0.2032	0.0034	+-	0.0024	0.0166	+-	0.0096	2.5943
49	Gelsemium_elegans|C208143	Gelsemium_sempervirens|C257596	0.1962	0.0136	+-	0.0046	0.0695	+-	0.027	8.9985
49	Liquidambar_styraciflua|C415005	Liquidambar_formosana|scaffold27246	0.0258	0.0018	+-	0.0018	0.0689	+-	0.0213	3.6581
49	Meehania_cordata|C238127	Meehania_fargesii|C365650	0.0469	0.0017	+-	0.0017	0.0353	+-	0.0159	4.4223
49	Menispermum_canadense|C520015	Menispermum_dauricum|scaffold34329	0.1202	0.0027	+-	0.0027	0.0227	+-	0.0132	5.089
49	Nelumbo_lutea|C236113	Nelumbo_nucifera|C277280	0.1684	0.0032	+-	0.0023	0.0192	+-	0.0111	3.3116
49	Penthorum_chinense|C215356	Penthorum_sedoides|C192543	0.3131	0.0069	+-	0.0035	0.0221	+-	0.0111	2.8522
49	Phryma_Aleptostachya|C491702	Phryma_leptostachya|scaffold17894	0.079	0.0018	+-	0.0018	0.023	+-	0.0103	3.5623
49	Sassafras_albidum|scaffold2457	Sassafras_tzumu|scaffold14994	0.1805	0.0017	+-	0.0017	0.0097	+-	0.0068	3.6748
49	Saururus_cernuus|scaffold13529	Saururus_chinensis|scaffold17401	0.1061	0.0033	+-	0.0023	0.0312	+-	0.0141	8.5509
50	Acorus_calamus|C184916	Acorus_gramineus|C270441	0.403	0.0143	+-	0.0045	0.0356	+-	0.012	8.5457
50	Convallaria_lmajalis|scaffold33103	Convallaria_majalis|scaffold42199	0.2924	0.0165	+-	0.0117	0.0566	+-	0.0404	3.1878
50	Cornus_alternifolia|C395456	Cornus_controversa|C400414	0.119	0.0028	+-	0.002	0.0237	+-	0.0098	3.2374
50	Cornus_ellipica|scaffold26491	Cornus_florida|C393180	0.122	0.0056	+-	0.0028	0.0457	+-	0.014	10.6664
50	Croomia_japonica|scaffold34206	Croomia_paueiflora|C462608	0.2418	0.0118	+-	0.0042	0.0487	+-	0.0166	8.968
50	Dysosma_pleiantha|scaffold22832	Dysosma_versipellis|C759180	0.0796	0.0027	+-	0.0019	0.0336	+-	0.012	2.5943
50	Liquidambar_styraciflua|C431853	Liquidambar_formosana|C663204	0.1146	0.0069	+-	0.0031	0.0599	+-	0.0162	3.6581
50	Meehania_cordata|C254649	Meehania_fargesii|C368664	0.0845	0.0014	+-	0.0014	0.0167	+-	0.0084	4.4223
50	Penthorum_chinense|C214802	Penthorum_sedoides|C204317	0.1709	0.0041	+-	0.0024	0.0239	+-	0.0098	2.8522
50	Phryma_Aleptostachya|C485338	Phryma_leptostachya|C356816	0.2861	0.0056	+-	0.0028	0.0197	+-	0.0089	3.5623
50	Sassafras_albidum|scaffold23717	Sassafras_tzumu|C402938	0.444	0.0086	+-	0.0035	0.0193	+-	0.0087	3.6748
50	Saururus_cernuus|C224226	Saururus_chinensis|C261256	0.0744	0.0044	+-	0.0025	0.0593	+-	0.0152	8.5509
51	Acorus_calamus|C185348	Acorus_gramineus|scaffold13166	0.1502	0.0054	+-	0.0031	0.0362	+-	0.0129	8.5457
51	Calycanthus_chinensis|C382228	Calycanthus_occidentalis|C377010	0.1642	0.0034	+-	0.0024	0.0209	+-	0.0105	4.6742
51	Cornus_alternifolia|scaffold20492	Cornus_controversa|C401060	0.3649	0.0027	+-	0.0019	0.0074	+-	0.0053	3.2374
51	Cornus_ellipica|scaffold29489	Cornus_florida|C398190	0.1369	0.006	+-	0.003	0.0437	+-	0.0147	10.6664
51	Cotinus_coggygria|scaffold12755	Cotinus_obovatus|scaffold6862	0.0857	0.0033	+-	0.0024	0.0391	+-	0.0139	1.893
51	Croomia_japonica|scaffold34879	Croomia_paueiflora|scaffold17922	0.3538	0.0206	+-	0.0055	0.0583	+-	0.0158	8.968
51	Gelsemium_elegans|C211360	Gelsemium_sempervirens|C261198	0.15	0.012	+-	0.004	0.0801	+-	0.0188	8.9985
51	Hamamelis_japonica|C377554	Hamamelis_vernalis|C319906	0.2243	0.0146	+-	0.0044	0.0649	+-	0.0166	5.5288
51	Liquidambar_styraciflua|scaffold19979	Liquidambar_formosana|scaffold24227	0.1339	0.006	+-	0.0029	0.0452	+-	0.0135	3.6581
51	Liriodendron_chinense|C815725	Liriodendron_tulipifera|C434546	0.1987	0.0018	+-	0.0018	0.0091	+-	0.0064	1.6912
51	Meehania_cordata|C252245	Meehania_fargesii|scaffold13583	0.1053	0.0028	+-	0.002	0.0267	+-	0.0101	4.4223
51	Menispermum_canadense|C541345	Menispermum_dauricum|C672905	0.092	0.0027	+-	0.0019	0.0289	+-	0.011	5.089
51	Nelumbo_lutea|C250605	Nelumbo_nucifera|scaffold5809	0.324	0.008	+-	0.0033	0.0248	+-	0.0102	3.3116
51	Penthorum_chinense|C216376	Penthorum_sedoides|C205357	0.4282	0.0105	+-	0.0037	0.0246	+-	0.011	2.8522
51	Phryma_Aleptostachya|C487444	Phryma_leptostachya|C358064	0.114	0.0013	+-	0.0013	0.0116	+-	0.0067	3.5623
51	Sassafras_albidum|C463071	Sassafras_tzumu|scaffold20637	0.2248	0.0042	+-	0.0024	0.0188	+-	0.0084	3.6748
51	Saururus_cernuus|C229984	Saururus_chinensis|C264944	0.1683	0.0041	+-	0.0024	0.0246	+-	0.0102	8.5509
52	Acorus_calamus|C186630	Acorus_gramineus|scaffold7667	0.0896	0.0075	+-	0.0032	0.0835	+-	0.0174	8.5457
52	Cornus_alternifolia|scaffold7643	Cornus_controversa|C397078	0.3099	0.0053	+-	0.0026	0.017	+-	0.0085	3.2374
52	Cornus_ellipica|scaffold29856	Cornus_florida|C389792	0.2649	0.004	+-	0.0023	0.0151	+-	0.0075	10.6664
52	Croomia_japonica|C846566	Croomia_paueiflora|C467754	0.3203	0.008	+-	0.0033	0.0249	+-	0.0102	8.968
52	Dysosma_pleiantha|C721420	Dysosma_versipellis|scaffold25485	0.3348	0.0012	+-	0.0012	0.0037	+-	0.0037	2.5943
52	Gelsemium_elegans|C207991	Gelsemium_sempervirens|C258298	0.3413	0.0197	+-	0.0051	0.0576	+-	0.0147	8.9985
52	Hamamelis_japonica|C350808	Hamamelis_vernalis|C321932	0.4853	0.0227	+-	0.0074	0.0467	+-	0.0186	5.5288
52	Liquidambar_styraciflua|scaffold18999	Liquidambar_formosana|C664930	0.0468	0.0025	+-	0.0018	0.0533	+-	0.0141	3.6581
52	Nelumbo_lutea|C246931	Nelumbo_nucifera|scaffold16125	0.2237	0.005	+-	0.0025	0.0225	+-	0.0093	3.3116
52	Penthorum_chinense|C211014	Penthorum_sedoides|C199685	0.099	0.0039	+-	0.0022	0.0391	+-	0.0132	2.8522
52	Phryma_Aleptostachya|C492044	Phryma_leptostachya|C361365	0.0918	0.0027	+-	0.0019	0.029	+-	0.0111	3.5623
52	Sassafras_albidum|scaffold23933	Sassafras_tzumu|scaffold20523	0.1698	0.0025	+-	0.0018	0.015	+-	0.0075	3.6748
52	Saururus_cernuus|scaffold1602	Saururus_chinensis|scaffold14304	0.2069	0.0064	+-	0.0029	0.031	+-	0.0118	8.5509
53	Acorus_calamus|C187099	Acorus_gramineus|C273613	0.1516	0.0143	+-	0.004	0.0942	+-	0.0183	8.5457
53	Calycanthus_chinensis|C386566	Calycanthus_occidentalis|C380972	0.3466	0.0101	+-	0.0034	0.0291	+-	0.0098	4.6742
53	Campsis_grandiflora|C499557	Campsis_radicans|scaffold22562	0.2866	0.0069	+-	0.0028	0.0241	+-	0.0092	3.0412
53	Cornus_alternifolia|scaffold21531	Cornus_controversa|C399822	0.206	0.0041	+-	0.002	0.0198	+-	0.0089	3.2374
53	Cornus_ellipica|C544668	Cornus_florida|C393764	0.0754	0.0043	+-	0.0022	0.0577	+-	0.0146	10.6664
53	Croomia_japonica|scaffold32777	Croomia_paueiflora|C472683	0.3504	0.0134	+-	0.0039	0.0383	+-	0.0112	8.968
53	Dysosma_pleiantha|C726616	Dysosma_versipellis|C761144	0.1434	0.0021	+-	0.0015	0.0147	+-	0.0074	2.5943
53	Gelsemium_elegans|scaffold7614	Gelsemium_sempervirens|C264332	0.165	0.0158	+-	0.0042	0.0957	+-	0.0185	8.9985
53	Hamamelis_japonica|scaffold5157	Hamamelis_vernalis|C317462	0.2706	0.0112	+-	0.0036	0.0415	+-	0.0113	5.5288
53	Liriodendron_chinense|C818843	Liriodendron_tulipifera|scaffold20639	0.4006	0.0023	+-	0.0016	0.0057	+-	0.004	1.6912
53	Meehania_cordata|C255333	Meehania_fargesii|scaffold10049	0.1311	0.0065	+-	0.0027	0.0497	+-	0.0134	4.4223
53	Penthorum_chinense|C216770	Penthorum_sedoides|C204899	0.1377	0.0033	+-	0.0019	0.024	+-	0.0085	2.8522
53	Phryma_Aleptostachya|scaffold16458	Phryma_leptostachya|C359293	0.0901	0.0034	+-	0.0019	0.0372	+-	0.0109	3.5623
53	Sassafras_albidum|C468827	Sassafras_tzumu|scaffold16742	0.1721	0.0033	+-	0.0019	0.0193	+-	0.0079	3.6748
53	Saururus_cernuus|scaffold9725	Saururus_chinensis|C268190	0.1087	0.0045	+-	0.0023	0.0418	+-	0.0122	8.5509
54	Acorus_calamus|C187513	Acorus_gramineus|C274747	0.2225	0.0109	+-	0.0034	0.0488	+-	0.0118	8.5457
54	Calycanthus_chinensis|C390545	Calycanthus_occidentalis|C382578	0.1222	0.004	+-	0.002	0.0329	+-	0.0117	4.6742
54	Dysosma_pleiantha|C727316	Dysosma_versipellis|C759812	0.061	0.001	+-	0.001	0.0167	+-	0.0068	2.5943
54	Gelsemium_elegans|scaffold2057	Gelsemium_sempervirens|C267840	0.3476	0.0155	+-	0.004	0.0446	+-	0.0126	8.9985
54	Liriodendron_chinense|scaffold32200	Liriodendron_tulipifera|C442059	0.1849	0.0032	+-	0.0018	0.0173	+-	0.0071	1.6912
54	Meehania_cordata|C258347	Meehania_fargesii|C373108	0.4044	0.0066	+-	0.0026	0.0164	+-	0.007	4.4223
54	Menispermum_canadense|scaffold38277	Menispermum_dauricum|scaffold9147	0.0242	0.001	+-	0.001	0.0413	+-	0.0116	5.089
54	Nelumbo_lutea|C250793	Nelumbo_nucifera|C282290	0.3201	0.0052	+-	0.0023	0.0164	+-	0.0067	3.3116
54	Phryma_Aleptostachya|C491296	Phryma_leptostachya|C361621	0.3779	0.0091	+-	0.003	0.0241	+-	0.0086	3.5623
54	Saururus_cernuus|scaffold7147	Saururus_chinensis|scaffold12905	0.1874	0.0116	+-	0.0036	0.0622	+-	0.0143	8.5509
55	Acorus_calamus|C187629	Acorus_gramineus|C275097	0.3448	0.0176	+-	0.0049	0.051	+-	0.0139	8.5457
55	Calycanthus_chinensis|C389087	Calycanthus_occidentalis|C378100	0.1905	0.005	+-	0.0025	0.0264	+-	0.0119	4.6742
55	Cornus_alternifolia|C397128	Cornus_controversa|C398448	0.0914	0.0013	+-	0.0013	0.0137	+-	0.008	3.2374
55	Cornus_ellipica|scaffold20037	Cornus_florida|C388130	0.0369	0.0013	+-	0.0013	0.0363	+-	0.0129	10.6664
55	Cotinus_coggygria|C374255	Cotinus_obovatus|C344960	0.1954	0.0026	+-	0.0018	0.0131	+-	0.0076	1.893
55	Croomia_japonica|scaffold36255	Croomia_paueiflora|C465292	0.1251	0.0057	+-	0.0028	0.0452	+-	0.0127	8.968
55	Dysosma_pleiantha|scaffold22643	Dysosma_versipellis|C749010	0.0933	0.0014	+-	0.0014	0.0147	+-	0.0074	2.5943
55	Gelsemium_elegans|scaffold11826	Gelsemium_sempervirens|C258880	0.1277	0.0082	+-	0.0034	0.0644	+-	0.019	8.9985
55	Hamamelis_japonica|C377368	Hamamelis_vernalis|C315712	0.1327	0.0098	+-	0.0037	0.0741	+-	0.017	5.5288
55	Liquidambar_styraciflua|scaffold20146	Liquidambar_formosana|scaffold32223	0.2098	0.0085	+-	0.0035	0.0406	+-	0.0119	3.6581
55	Liriodendron_chinense|C814619	Liriodendron_tulipifera|C433385	0.1667	0.0013	+-	0.0013	0.0079	+-	0.0056	1.6912
55	Meehania_cordata|scaffold14870	Meehania_fargesii|scaffold12540	0.3369	0.0055	+-	0.0028	0.0164	+-	0.0074	4.4223
55	Menispermum_canadense|C540743	Menispermum_dauricum|scaffold40237	0.2184	0.0052	+-	0.0026	0.0239	+-	0.0107	5.089
55	Penthorum_chinense|C212734	Penthorum_sedoides|C202011	0.1975	0.0056	+-	0.0028	0.0283	+-	0.0101	2.8522
55	Phryma_Aleptostachya|scaffold7779	Phryma_leptostachya|C354511	0.3951	0.0228	+-	0.0056	0.0578	+-	0.0151	3.5623
55	Sassafras_albidum|scaffold21892	Sassafras_tzumu|C399268	0.1349	0.0027	+-	0.0019	0.0198	+-	0.0089	3.6748
55	Saururus_cernuus|C230836	Saururus_chinensis|scaffold17204	0.2992	0.0146	+-	0.0065	0.0487	+-	0.0202	8.5509
56	Acorus_calamus|C188243	Acorus_gramineus|scaffold1334	0.1913	0.0069	+-	0.0028	0.0362	+-	0.0106	8.5457
56	Campsis_grandiflora|scaffold25150	Campsis_radicans|C360364	0.2394	0.008	+-	0.003	0.0334	+-	0.0102	3.0412
56	Cornus_ellipica|C541632	Cornus_florida|scaffold15712	0.1403	0.0056	+-	0.0025	0.0401	+-	0.0109	10.6664
56	Cotinus_coggygria|scaffold18560	Cotinus_obovatus|C349146	0.1551	0.0044	+-	0.0022	0.0286	+-	0.0096	1.893
56	Croomia_japonica|scaffold21259	Croomia_paueiflora|scaffold21156	0.2244	0.0134	+-	0.0042	0.0596	+-	0.0139	8.968
56	Gelsemium_elegans|C209837	Gelsemium_sempervirens|C263850	0.2844	0.0085	+-	0.003	0.0299	+-	0.0101	8.9985
56	Hamamelis_japonica|C377924	Hamamelis_vernalis|C321900	0.0589	0.0022	+-	0.0015	0.0367	+-	0.0112	5.5288
56	Liquidambar_styraciflua|C435397	Liquidambar_formosana|C665582	0.3402	0.0072	+-	0.0028	0.0212	+-	0.0084	3.6581
56	Meehania_cordata|C253905	Meehania_fargesii|C370796	0.1968	0.0077	+-	0.0029	0.039	+-	0.0114	4.4223
56	Menispermum_canadense|C542241	Menispermum_dauricum|C674619	0.2731	0.0033	+-	0.0019	0.0122	+-	0.0061	5.089
56	Penthorum_chinense|C216968	Penthorum_sedoides|C209147	0.0583	0.0022	+-	0.0015	0.0374	+-	0.012	2.8522
56	Phryma_Aleptostachya|C487690	Phryma_leptostachya|C358823	0.3441	0.0037	+-	0.0021	0.0108	+-	0.0063	3.5623
56	Sassafras_albidum|C471939	Sassafras_tzumu|C406798	0.2758	0.0077	+-	0.0029	0.028	+-	0.0099	3.6748
57	Acorus_calamus|C188633	Acorus_gramineus|scaffold17413	0.2148	0.0161	+-	0.0043	0.0748	+-	0.0156	8.5457
57	Calycanthus_chinensis|C386968	Calycanthus_occidentalis|C376254	0.3275	0.0074	+-	0.0028	0.0225	+-	0.0093	4.6742
57	Campsis_grandiflora|scaffold32644	Campsis_radicans|scaffold13960	0.2882	0.0048	+-	0.0024	0.0166	+-	0.0074	3.0412
57	Cornus_alternifolia|C397236	Cornus_controversa|scaffold19032	0.2129	0.0042	+-	0.0021	0.0198	+-	0.0089	3.2374
57	Dysosma_pleiantha|scaffold11267	Dysosma_versipellis|C757300	0.1354	0.0036	+-	0.0021	0.0265	+-	0.0095	2.5943
57	Hamamelis_japonica|scaffold13339	Hamamelis_vernalis|C320252	0.3129	0.0109	+-	0.0037	0.0349	+-	0.0107	5.5288
57	Liquidambar_styraciflua|scaffold14016	Liquidambar_formosana|C663474	0.3245	0.0156	+-	0.005	0.0481	+-	0.0154	3.6581
57	Meehania_cordata|scaffold14557	Meehania_fargesii|scaffold6555	0.3237	0.01	+-	0.0036	0.031	+-	0.0099	4.4223
57	Menispermum_canadense|C543199	Menispermum_dauricum|C675927	0.0807	0.0012	+-	0.0012	0.0152	+-	0.0068	5.089
57	Penthorum_chinense|C214260	Penthorum_sedoides|scaffold1644	0.2862	0.0073	+-	0.003	0.0254	+-	0.0097	2.8522
57	Phryma_Aleptostachya|C485380	Phryma_leptostachya|C356132	0.1797	0.0069	+-	0.0028	0.0386	+-	0.0124	3.5623
58	Acorus_calamus|C189573	Acorus_gramineus|C272083	0.1554	0.0062	+-	0.0026	0.0398	+-	0.011	8.5457
58	Calycanthus_chinensis|C392408	Calycanthus_occidentalis|C384500	0.0584	0.0011	+-	0.0011	0.019	+-	0.0078	4.6742
58	Cornus_alternifolia|C404580	Cornus_controversa|scaffold8276	0.177	0.0033	+-	0.0019	0.0184	+-	0.0076	3.2374
58	Cornus_ellipica|C545276	Cornus_florida|C398686	0.3749	0.0131	+-	0.0038	0.0349	+-	0.0107	10.6664
58	Cotinus_coggygria|C378829	Cotinus_obovatus|scaffold14721	0.1505	0.0021	+-	0.0015	0.0138	+-	0.0069	1.893
58	Croomia_japonica|scaffold31339	Croomia_paueiflora|C471147	0.1796	0.0069	+-	0.0028	0.0386	+-	0.0101	8.968
58	Hamamelis_japonica|C380914	Hamamelis_vernalis|C325085	0.1354	0.0043	+-	0.0022	0.0321	+-	0.0098	5.5288
58	Liquidambar_styraciflua|C436809	Liquidambar_formosana|C666808	0.1203	0.0052	+-	0.0023	0.0435	+-	0.0123	3.6581
58	Liriodendron_chinense|C817343	Liriodendron_tulipifera|C445817	0.173	0.0021	+-	0.0015	0.0124	+-	0.0062	1.6912
58	Meehania_cordata|scaffold9562	Meehania_fargesii|scaffold18482	0.0453	0.0012	+-	0.0012	0.0271	+-	0.0091	4.4223
58	Menispermum_canadense|C542779	Menispermum_dauricum|scaffold32451	0.1212	0.0032	+-	0.0018	0.0261	+-	0.0093	5.089
58	Nelumbo_lutea|scaffold13996	Nelumbo_nucifera|C283974	0.2104	0.0043	+-	0.0021	0.0204	+-	0.0077	3.3116
58	Penthorum_chinense|C219910	Penthorum_sedoides|scaffold3307	0.2317	0.004	+-	0.0023	0.0173	+-	0.0087	2.8522
58	Phryma_Aleptostachya|C494194	Phryma_leptostachya|scaffold17660	0.1417	0.0022	+-	0.0016	0.0155	+-	0.007	3.5623
58	Saururus_cernuus|C231820	Saururus_chinensis|C267880	0.0562	0.0023	+-	0.0016	0.0401	+-	0.0109	8.5509
59	Acorus_calamus|C190235	Acorus_gramineus|C276551	0.2006	0.0108	+-	0.0041	0.0538	+-	0.0146	8.5457
59	Calycanthus_chinensis|scaffold10754	Calycanthus_occidentalis|C382974	0.1191	0.003	+-	0.0021	0.0251	+-	0.0103	4.6742
59	Cornus_ellipica|C538108	Cornus_florida|C383766	0.3428	0.0023	+-	0.0023	0.0067	+-	0.0068	10.6664
59	Cotinus_coggygria|C363899	Cotinus_obovatus|C356260	0.025	0.002	+-	0.002	0.0783	+-	0.0232	1.893
59	Croomia_japonica|scaffold31741	Croomia_paueiflora|scaffold18578	0.1738	0.008	+-	0.0036	0.0463	+-	0.0149	8.968
59	Dysosma_pleiantha|C728804	Dysosma_versipellis|C760592	0.2209	0.0029	+-	0.002	0.0131	+-	0.0076	2.5943
59	Gelsemium_elegans|C213992	Gelsemium_sempervirens|C267042	0.1906	0.0082	+-	0.0034	0.0431	+-	0.0155	8.9985
59	Hamamelis_japonica|scaffold1681	Hamamelis_vernalis|C327907	0.2348	0.0079	+-	0.0032	0.0335	+-	0.0113	5.5288
59	Liquidambar_styraciflua|scaffold19294	Liquidambar_formosana|scaffold29338	0.0544	0.0013	+-	0.0013	0.0243	+-	0.01	3.6581
59	Liriodendron_chinense|scaffold43245	Liriodendron_tulipifera|C442047	0.0759	0.0014	+-	0.0014	0.0185	+-	0.0083	1.6912
59	Penthorum_chinense|C216130	Penthorum_sedoides|C208807	0.3309	0.0078	+-	0.0032	0.0235	+-	0.0096	2.8522
59	Phryma_Aleptostachya|C491736	Phryma_leptostachya|C363019	0.2218	0.0059	+-	0.003	0.0266	+-	0.0109	3.5623
59	Saururus_cernuus|C231964	Saururus_chinensis|C264928	0.1845	0.0098	+-	0.004	0.0533	+-	0.0156	8.5509
60	Acorus_calamus|C190869	Acorus_gramineus|scaffold6421	0.1877	0.0176	+-	0.0042	0.0938	+-	0.0154	8.5457
60	Campsis_grandiflora|scaffold32701	Campsis_radicans|scaffold23548	0.0473	0.0019	+-	0.0014	0.0406	+-	0.0114	3.0412
60	Convallaria_lmajalis|C471236	Convallaria_majalis|C680571	0.4404	0.0062	+-	0.0062	0.0141	+-	0.0141	3.1878
60	Cornus_ellipica|C548796	Cornus_florida|scaffold19141	0.1836	0.0043	+-	0.0022	0.0235	+-	0.0079	10.6664
60	Cotinus_coggygria|C377479	Cotinus_obovatus|scaffold19048	0.106	0.0008	+-	0.0008	0.0076	+-	0.0044	1.893
60	Croomia_japonica|scaffold23642	Croomia_paueiflora|C472883	0.2575	0.0089	+-	0.003	0.0345	+-	0.009	8.968
60	Dysosma_pleiantha|C731132	Dysosma_versipellis|C764938	0.3466	0.0044	+-	0.002	0.0126	+-	0.0052	2.5943
60	Gelsemium_elegans|C219278	Gelsemium_sempervirens|scaffold14816	0.2156	0.0137	+-	0.0035	0.0634	+-	0.0133	8.9985
60	Liriodendron_chinense|C823327	Liriodendron_tulipifera|C447597	0.1506	0.0052	+-	0.0021	0.0346	+-	0.0085	1.6912
60	Meehania_cordata|scaffold15224	Meehania_fargesii|scaffold18852	0.0544	0.0026	+-	0.0015	0.0485	+-	0.0105	4.4223
60	Nelumbo_lutea|C255895	Nelumbo_nucifera|C287640	0.2047	0.0036	+-	0.0018	0.0175	+-	0.0067	3.3116
60	Phryma_Aleptostachya|scaffold17160	Phryma_leptostachya|scaffold17640	0.1543	0.0052	+-	0.0021	0.034	+-	0.0089	3.5623
60	Saururus_cernuus|C233134	Saururus_chinensis|C270228	0.0904	0.002	+-	0.0014	0.0218	+-	0.0069	8.5509
61	Acorus_calamus|C191287	Acorus_gramineus|scaffold11555	0.0659	0.0042	+-	0.0021	0.064	+-	0.0134	8.5457
61	Campsis_grandiflora|scaffold32302	Campsis_radicans|C362646	0.2092	0.0053	+-	0.0024	0.0253	+-	0.0085	3.0412
61	Convallaria_lmajalis|scaffold34501	Convallaria_majalis|C813514	0.2066	0.0066	+-	0.003	0.0319	+-	0.0102	3.1878
61	Cornus_alternifolia|C403640	Cornus_controversa|C406092	0.2102	0.004	+-	0.002	0.0189	+-	0.0077	3.2374
61	Cornus_ellipica|scaffold30825	Cornus_florida|C399756	0.0317	0.0009	+-	0.0009	0.0294	+-	0.0105	10.6664
61	Cotinus_coggygria|C376295	Cotinus_obovatus|C354904	0.2677	0.0064	+-	0.0024	0.024	+-	0.0085	1.893
61	Gelsemium_elegans|C217447	Gelsemium_sempervirens|C266848	0.1763	0.01	+-	0.0032	0.0568	+-	0.0141	8.9985
61	Hamamelis_japonica|C380994	Hamamelis_vernalis|scaffold18239	0.2699	0.0084	+-	0.0028	0.031	+-	0.0099	5.5288
61	Liquidambar_styraciflua|C437843	Liquidambar_formosana|C670338	0.1415	0.0056	+-	0.0023	0.0398	+-	0.0108	3.6581
61	Liriodendron_chinense|scaffold35101	Liriodendron_tulipifera|scaffold22655	0.3032	0.003	+-	0.0018	0.01	+-	0.0058	1.6912
61	Menispermum_canadense|C543277	Menispermum_dauricum|scaffold37916	0.0854	0.001	+-	0.001	0.0119	+-	0.0059	5.089
61	Nelumbo_lutea|C252997	Nelumbo_nucifera|scaffold15662	0.3217	0.006	+-	0.0025	0.0187	+-	0.0077	3.3116
61	Penthorum_chinense|C218996	Penthorum_sedoides|C208477	0.0929	0.002	+-	0.0014	0.0212	+-	0.0081	2.8522
61	Phryma_Aleptostachya|C494548	Phryma_leptostachya|C363987	0.1959	0.0063	+-	0.0026	0.0319	+-	0.0097	3.5623
61	Sassafras_albidum|C471123	Sassafras_tzumu|C409054	0.193	0.002	+-	0.0014	0.0103	+-	0.0052	3.6748
61	Saururus_cernuus|C230534	Saururus_chinensis|C227325	0.2401	0.0091	+-	0.0046	0.0381	+-	0.0192	8.5509
62	Acorus_calamus|C193183	Acorus_gramineus|C272317	0.06	0.0025	+-	0.0018	0.0417	+-	0.0134	8.5457
62	Calycanthus_chinensis|scaffold17500	Calycanthus_occidentalis|C384348	0.0742	0.0012	+-	0.0012	0.0161	+-	0.0072	4.6742
62	Campsis_grandiflora|scaffold4561	Campsis_radicans|C364974	0.3866	0.0024	+-	0.0017	0.0061	+-	0.0043	3.0412
62	Convallaria_lmajalis|scaffold16898	Convallaria_majalis|scaffold17866	0.1834	0.0056	+-	0.0028	0.0308	+-	0.0127	3.1878
62	Cornus_ellipica|C546770	Cornus_florida|scaffold19085	0.4506	0.0071	+-	0.0029	0.0157	+-	0.007	10.6664
62	Croomia_japonica|C852524	Croomia_paueiflora|C471881	0.1869	0.0071	+-	0.0029	0.038	+-	0.0112	8.968
62	Dysosma_pleiantha|scaffold27807	Dysosma_versipellis|scaffold23700	0.4311	0.0061	+-	0.0027	0.0142	+-	0.0064	2.5943
62	Gelsemium_elegans|scaffold2964	Gelsemium_sempervirens|scaffold3368	0.1248	0.0059	+-	0.0027	0.0476	+-	0.0129	8.9985
62	Hamamelis_japonica|C379936	Hamamelis_vernalis|C327067	0.0783	0.0031	+-	0.0022	0.0392	+-	0.0132	5.5288
62	Liquidambar_styraciflua|scaffold21386	Liquidambar_formosana|C669882	0.1825	0.0047	+-	0.0023	0.0256	+-	0.0091	3.6581
62	Meehania_cordata|scaffold12906	Meehania_fargesii|C372410	0.0721	0.0025	+-	0.0017	0.0342	+-	0.01	4.4223
62	Menispermum_canadense|C543769	Menispermum_dauricum|C676421	0.0476	0.0023	+-	0.0017	0.0491	+-	0.0129	5.089
62	Phryma_Aleptostachya|C492880	Phryma_leptostachya|scaffold17540	0.0664	0.0025	+-	0.0017	0.0371	+-	0.0105	3.5623
62	Sassafras_albidum|scaffold21299	Sassafras_tzumu|C405330	0.1873	0.0015	+-	0.0015	0.0083	+-	0.0058	3.6748
62	Saururus_cernuus|scaffold13346	Saururus_chinensis|C267462	0.1065	0.0052	+-	0.0028	0.0493	+-	0.0154	8.5509
63	Calycanthus_chinensis|C367506	Calycanthus_occidentalis|C360365	0.1849	0.0042	+-	0.0042	0.0226	+-	0.016	4.6742
63	Cornus_ellipica|C534784	Cornus_florida|C278247	0.2128	0.0076	+-	0.0077	0.0359	+-	0.0255	10.6664
63	Gelsemium_elegans|C198694	Gelsemium_sempervirens|scaffold13828	0.3171	0.0257	+-	0.0105	0.081	+-	0.037	8.9985
63	Liquidambar_styraciflua|scaffold20656	Liquidambar_formosana|C660778	0.438	0.02	+-	0.0107	0.0457	+-	0.0294	3.6581
63	Nelumbo_lutea|C242049	Nelumbo_nucifera|C258422	0.3859	0.0054	+-	0.0054	0.014	+-	0.014	3.3116
63	Penthorum_chinense|scaffold6436	Penthorum_sedoides|scaffold4722	0.353	0.0037	+-	0.0037	0.0105	+-	0.0105	2.8522
63	Phryma_Aleptostachya|C471482	Phryma_leptostachya|C345231	0.3472	0.0102	+-	0.0072	0.0294	+-	0.0209	3.5623
64	Calycanthus_chinensis|C370760	Calycanthus_occidentalis|scaffold13617	0.2431	0.0051	+-	0.0036	0.0212	+-	0.0123	4.6742
64	Campsis_grandiflora|scaffold26129	Campsis_radicans|scaffold19626	0.1233	0.0027	+-	0.0027	0.0218	+-	0.0126	3.0412
64	Cornus_ellipica|C518459	Cornus_florida|scaffold18561	0.4445	0.0116	+-	0.0058	0.0261	+-	0.0151	10.6664
64	Cotinus_coggygria|C364973	Cotinus_obovatus|scaffold17199	0.1238	0.0026	+-	0.0026	0.0207	+-	0.012	1.893
64	Gelsemium_elegans|C200589	Gelsemium_sempervirens|scaffold12112	0.2166	0.0107	+-	0.0054	0.0495	+-	0.0189	8.9985
64	Sassafras_albidum|scaffold23094	Sassafras_tzumu|scaffold15035	0.1287	0.0027	+-	0.0027	0.021	+-	0.0122	3.6748
64	Saururus_cernuus|C214129	Saururus_chinensis|C248326	0.2765	0.0121	+-	0.007	0.0436	+-	0.022	8.5509
65	Acorus_calamus|scaffold13106	Acorus_gramineus|C273431	0.2199	0.0119	+-	0.004	0.0543	+-	0.0159	8.5457
65	Calycanthus_chinensis|C388212	Calycanthus_occidentalis|C380742	0.2076	0.0076	+-	0.0029	0.0367	+-	0.0117	4.6742
65	Campsis_grandiflora|scaffold25598	Campsis_radicans|C362248	0.368	0.0087	+-	0.0031	0.0237	+-	0.0098	3.0412
65	Convallaria_lmajalis|scaffold33072	Convallaria_majalis|scaffold44935	0.3208	0.0055	+-	0.0025	0.0171	+-	0.0086	3.1878
65	Croomia_japonica|C849872	Croomia_paueiflora|C473053	0.3265	0.0155	+-	0.0043	0.0475	+-	0.0124	8.968
65	Dysosma_pleiantha|scaffold30036	Dysosma_versipellis|scaffold20589	0.1975	0.0051	+-	0.0025	0.0256	+-	0.0105	2.5943
65	Gelsemium_elegans|C212434	Gelsemium_sempervirens|C266834	0.1823	0.0165	+-	0.0043	0.0905	+-	0.0191	8.9985
65	Hamamelis_japonica|scaffold6146	Hamamelis_vernalis|C320486	0.0809	0.0054	+-	0.0024	0.0663	+-	0.0164	5.5288
65	Liquidambar_styraciflua|C435571	Liquidambar_formosana|scaffold28761	0.228	0.0066	+-	0.003	0.029	+-	0.0103	3.6581
65	Liriodendron_chinense|scaffold45251	Liriodendron_tulipifera|scaffold22651	0.2384	0.0043	+-	0.0021	0.0179	+-	0.0081	1.6912
65	Meehania_cordata|C256313	Meehania_fargesii|C372696	0.2125	0.0085	+-	0.0032	0.04	+-	0.0113	4.4223
65	Menispermum_canadense|C542719	Menispermum_dauricum|scaffold43012	0.3094	0.0058	+-	0.0026	0.0186	+-	0.0077	5.089
65	Penthorum_chinense|C214438	Penthorum_sedoides|C205555	0.0993	0.0025	+-	0.0018	0.0255	+-	0.0104	2.8522
65	Sassafras_albidum|C468241	Sassafras_tzumu|scaffold18106	0.1543	0.0045	+-	0.0022	0.0289	+-	0.0103	3.6748
65	Saururus_cernuus|C231844	Saururus_chinensis|scaffold14584	0.2236	0.0097	+-	0.0034	0.0433	+-	0.0127	8.5509
66	Acorus_calamus|scaffold1623	Acorus_gramineus|scaffold13011	0.0809	0.0025	+-	0.0025	0.0308	+-	0.0179	8.5457
66	Campsis_grandiflora|scaffold31396	Campsis_radicans|C348122	0.2551	0.006	+-	0.0042	0.0234	+-	0.0118	3.0412
66	Convallaria_lmajalis|C644216	Convallaria_majalis|scaffold26173	0.4919	0.0078	+-	0.0045	0.0158	+-	0.0112	3.1878
66	Cotinus_coggygria|C351178	Cotinus_obovatus|scaffold11672	0.206	0.0055	+-	0.0039	0.0268	+-	0.0135	1.893
66	Croomia_japonica|C810606	Croomia_paueiflora|C449274	0.3366	0.0137	+-	0.0061	0.0406	+-	0.0205	8.968
66	Dysosma_pleiantha|scaffold25293	Dysosma_versipellis|scaffold27640	0.108	0.0029	+-	0.0029	0.0269	+-	0.0135	2.5943
66	Gelsemium_elegans|C200236	Gelsemium_sempervirens|C246899	0.3474	0.0167	+-	0.0068	0.048	+-	0.0185	8.9985
66	Hamamelis_japonica|C353558	Hamamelis_vernalis|C304343	0.2552	0.0107	+-	0.0054	0.0419	+-	0.019	5.5288
66	Phryma_Aleptostachya|C463795	Phryma_leptostachya|C341777	0.2569	0.0108	+-	0.0054	0.0419	+-	0.019	3.5623
66	Saururus_cernuus|C213333	Saururus_chinensis|C245247	0.408	0.0027	+-	0.0027	0.0066	+-	0.0066	8.5509
67	Acorus_calamus|scaffold2329	Acorus_gramineus|C273347	0.0809	0.0025	+-	0.0025	0.0305	+-	0.0154	8.5457
67	Calycanthus_chinensis|C384146	Calycanthus_occidentalis|C375920	0.071	0.0014	+-	0.0014	0.0193	+-	0.0087	4.6742
67	Campsis_grandiflora|scaffold22068	Campsis_radicans|scaffold7266	0.1217	0.0022	+-	0.0022	0.0179	+-	0.0104	3.0412
67	Cornus_alternifolia|C397034	Cornus_controversa|scaffold10737	0.3531	0.0014	+-	0.0014	0.0038	+-	0.0038	3.2374
67	Cornus_ellipica|scaffold2059	Cornus_florida|C390606	0.0667	0.0017	+-	0.0017	0.0261	+-	0.0118	10.6664
67	Croomia_japonica|C843772	Croomia_paueiflora|C465642	0.2071	0.012	+-	0.0042	0.0578	+-	0.0163	8.968
67	Liquidambar_styraciflua|scaffold15578	Liquidambar_formosana|scaffold32533	0.2645	0.0097	+-	0.0037	0.0366	+-	0.0118	3.6581
67	Meehania_cordata|C249571	Meehania_fargesii|C368508	0.1222	0.0028	+-	0.002	0.0226	+-	0.0093	4.4223
67	Penthorum_chinense|C221604	Penthorum_sedoides|scaffold9143	0.0545	0.0026	+-	0.0019	0.0482	+-	0.0154	2.8522
67	Sassafras_albidum|C463387	Sassafras_tzumu|scaffold20360	0.0751	0.0014	+-	0.0014	0.0188	+-	0.0085	3.6748
68	Acorus_calamus|scaffold3725	Acorus_gramineus|C276129	0.1953	0.0103	+-	0.0031	0.0528	+-	0.0105	8.5457
68	Calycanthus_chinensis|C392040	Calycanthus_occidentalis|C385476	0.0413	0.0017	+-	0.0012	0.0411	+-	0.0098	4.6742
68	Campsis_grandiflora|scaffold16074	Campsis_radicans|C368006	0.05	0.0016	+-	0.0011	0.0319	+-	0.0093	3.0412
68	Convallaria_lmajalis|C663004	Convallaria_majalis|scaffold42083	0.1629	0.0025	+-	0.0015	0.0156	+-	0.0059	3.1878
68	Dysosma_pleiantha|scaffold29449	Dysosma_versipellis|C762950	0.1563	0.0017	+-	0.0012	0.0111	+-	0.005	2.5943
68	Gelsemium_elegans|C214940	Gelsemium_sempervirens|scaffold10173	0.249	0.0203	+-	0.0041	0.0813	+-	0.014	8.9985
68	Hamamelis_japonica|scaffold21716	Hamamelis_vernalis|C327547	0.2215	0.0081	+-	0.0026	0.0365	+-	0.0095	5.5288
68	Liquidambar_styraciflua|C439895	Liquidambar_formosana|C669624	0.1755	0.0076	+-	0.0025	0.0431	+-	0.01	3.6581
68	Meehania_cordata|C260915	Meehania_fargesii|C375505	0.2661	0.0064	+-	0.0023	0.024	+-	0.0081	4.4223
68	Menispermum_canadense|C544725	Menispermum_dauricum|scaffold32665	0.498	0.0052	+-	0.0021	0.0104	+-	0.0047	5.089
68	Nelumbo_lutea|C254767	Nelumbo_nucifera|scaffold4701	0.4925	0.0034	+-	0.0017	0.0068	+-	0.0039	3.3116
68	Penthorum_chinense|C221322	Penthorum_sedoides|C212191	0.036	0.0008	+-	0.0008	0.0233	+-	0.0074	2.8522
68	Phryma_Aleptostachya|C493240	Phryma_leptostachya|C364143	0.2701	0.0058	+-	0.0022	0.0214	+-	0.0072	3.5623
68	Sassafras_albidum|C472977	Sassafras_tzumu|C407640	0.1624	0.0035	+-	0.0018	0.0217	+-	0.0066	3.6748
69	Calycanthus_chinensis|scaffold11801	Calycanthus_occidentalis|scaffold18325	0.4367	0.0047	+-	0.0047	0.0108	+-	0.0108	4.6742
69	Croomia_japonica|C805908	Croomia_paueiflora|C458804	0.4333	0.0201	+-	0.0101	0.0464	+-	0.0234	8.968
69	Dysosma_pleiantha|C680845	Dysosma_versipellis|C729937	0.1134	0.0051	+-	0.0051	0.0448	+-	0.0262	2.5943
69	Gelsemium_elegans|C199194	Gelsemium_sempervirens|C243603	0.1488	0.0156	+-	0.009	0.1047	+-	0.0481	8.9985
69	Hamamelis_japonica|scaffold8065	Hamamelis_vernalis|scaffold12614	0.1444	0.0052	+-	0.0052	0.0359	+-	0.0209	5.5288
69	Nelumbo_lutea|C230479	Nelumbo_nucifera|C264476	0.1431	0.0033	+-	0.0033	0.0229	+-	0.0133	3.3116
70	Croomia_japonica|C784163	Croomia_paueiflora|scaffold14446	0.2004	0.0051	+-	0.0051	0.0252	+-	0.0179	8.968
70	Liquidambar_styraciflua|C403375	Liquidambar_formosana|C634682	0.3753	0.0099	+-	0.007	0.0263	+-	0.0187	3.6581
70	Penthorum_chinense|scaffold3337	Penthorum_sedoides|C180667	0.2698	0.0249	+-	0.0125	0.0923	+-	0.0542	2.8522
71	Calycanthus_chinensis|C382572	Calycanthus_occidentalis|C369573	0.3844	0.0051	+-	0.0036	0.0132	+-	0.0093	4.6742
71	Campsis_grandiflora|C469332	Campsis_radicans|scaffold20167	0.177	0.0032	+-	0.0032	0.018	+-	0.0128	3.0412
71	Dysosma_pleiantha|C712372	Dysosma_versipellis|scaffold27825	0.1451	0.0023	+-	0.0023	0.016	+-	0.0113	2.5943
71	Gelsemium_elegans|C201829	Gelsemium_sempervirens|C250373	0.1252	0.0072	+-	0.0042	0.0578	+-	0.0207	8.9985
71	Liquidambar_styraciflua|C423602	Liquidambar_formosana|C659862	0.0613	0.0045	+-	0.0032	0.0742	+-	0.0254	3.6581
71	Meehania_cordata|C241283	Meehania_fargesii|C362046	0.1227	0.0048	+-	0.0034	0.0392	+-	0.0178	4.4223
71	Nelumbo_lutea|C236199	Nelumbo_nucifera|C276038	0.188	0.0024	+-	0.0024	0.0129	+-	0.0091	3.3116
71	Penthorum_chinense|scaffold3382	Penthorum_sedoides|scaffold2651	0.2787	0.0048	+-	0.0034	0.0172	+-	0.0122	2.8522
72	Acorus_calamus|scaffold8652	Acorus_gramineus|scaffold12350	0.1355	0.0081	+-	0.0033	0.06	+-	0.0145	8.5457
72	Cornus_ellipica|C542934	Cornus_florida|C395690	0.1275	0.0065	+-	0.0029	0.0506	+-	0.0139	10.6664
72	Croomia_japonica|C845360	Croomia_paueiflora|C460180	0.0291	0.002	+-	0.002	0.0699	+-	0.0214	8.968
72	Gelsemium_elegans|C212616	Gelsemium_sempervirens|scaffold12609	0.0893	0.0052	+-	0.0026	0.0578	+-	0.0148	8.9985
72	Hamamelis_japonica|scaffold10097	Hamamelis_vernalis|C309826	0.1517	0.0099	+-	0.0038	0.0656	+-	0.0164	5.5288
72	Liquidambar_styraciflua|C429104	Liquidambar_formosana|C665150	0.2181	0.0049	+-	0.0025	0.0225	+-	0.0086	3.6581
72	Meehania_cordata|scaffold2425	Meehania_fargesii|C369360	0.1462	0.0036	+-	0.0021	0.0249	+-	0.0094	4.4223
72	Menispermum_canadense|C542113	Menispermum_dauricum|C671673	0.2686	0.0025	+-	0.0018	0.0093	+-	0.0054	5.089
72	Nelumbo_lutea|C249423	Nelumbo_nucifera|C280228	0.3723	0.0026	+-	0.0018	0.007	+-	0.0049	3.3116
72	Penthorum_chinense|C215644	Penthorum_sedoides|C203943	0.1794	0.0012	+-	0.0012	0.0068	+-	0.0048	2.8522
72	Phryma_Aleptostachya|C486086	Phryma_leptostachya|C359581	0.3106	0.0074	+-	0.003	0.0238	+-	0.0091	3.5623
72	Saururus_cernuus|C229244	Saururus_chinensis|C260794	0.1022	0.0037	+-	0.0021	0.0362	+-	0.0116	8.5509
73	Acorus_calamus|scaffold9094	Acorus_gramineus|scaffold18179	0.2697	0.008	+-	0.0027	0.0295	+-	0.0075	8.5457
73	Calycanthus_chinensis|C394074	Calycanthus_occidentalis|C386742	0.1	0.0035	+-	0.0016	0.035	+-	0.0093	4.6742
73	Campsis_grandiflora|scaffold1913	Campsis_radicans|C363730	0.3437	0.0024	+-	0.0014	0.0071	+-	0.0041	3.0412
73	Cornus_alternifolia|scaffold16806	Cornus_controversa|C409832	0.1865	0.0024	+-	0.0014	0.0131	+-	0.0054	3.2374
73	Cornus_ellipica|scaffold23725	Cornus_florida|C402190	0.2241	0.0073	+-	0.0024	0.0324	+-	0.0084	10.6664
73	Croomia_japonica|scaffold27058	Croomia_paueiflora|C469171	0.3441	0.0135	+-	0.0036	0.0392	+-	0.0097	8.968
73	Dysosma_pleiantha|C277125	Dysosma_versipellis|C329561	0.3582	0.0112	+-	0.0112	0.0312	+-	0.0315	2.5943
73	Gelsemium_elegans|C219166	Gelsemium_sempervirens|C269532	0.2584	0.011	+-	0.0031	0.0426	+-	0.0104	8.9985
73	Hamamelis_japonica|scaffold18139	Hamamelis_vernalis|C325827	0.2558	0.0065	+-	0.0023	0.0254	+-	0.0074	5.5288
73	Liquidambar_styraciflua|C438581	Liquidambar_formosana|C669166	0.0974	0.0039	+-	0.0018	0.0404	+-	0.0097	3.6581
73	Liriodendron_chinense|scaffold41228	Liriodendron_tulipifera|C445181	0.3129	0.0025	+-	0.0014	0.0079	+-	0.004	1.6912
73	Meehania_cordata|scaffold10825	Meehania_fargesii|scaffold1925	0.1614	0.0102	+-	0.0028	0.0631	+-	0.0126	4.4223
73	Menispermum_canadense|C544257	Menispermum_dauricum|scaffold14306	0.1224	0.0033	+-	0.0016	0.0267	+-	0.0075	5.089
73	Nelumbo_lutea|C253739	Nelumbo_nucifera|C283836	0.4913	0.0047	+-	0.0019	0.0096	+-	0.0048	3.3116
73	Penthorum_chinense|C221330	Penthorum_sedoides|C207014	0.3617	0.0054	+-	0.0024	0.015	+-	0.0062	2.8522
73	Phryma_Aleptostachya|C494738	Phryma_leptostachya|C367241	0.0939	0.0026	+-	0.0015	0.0277	+-	0.0078	3.5623
73	Sassafras_albidum|scaffold22777	Sassafras_tzumu|C406534	0.192	0.0024	+-	0.0014	0.0126	+-	0.0052	3.6748
73	Saururus_cernuus|C234238	Saururus_chinensis|C268350	0.3218	0.0099	+-	0.0029	0.0307	+-	0.0083	8.5509
74	Calycanthus_chinensis|C362370	Calycanthus_occidentalis|C321582	0.2005	0.0053	+-	0.0053	0.0264	+-	0.0188	4.6742
74	Campsis_grandiflora|scaffold30148	Campsis_radicans|C334624	0.3912	0.0052	+-	0.0052	0.0132	+-	0.0133	3.0412
74	Croomia_japonica|scaffold25674	Croomia_paueiflora|C446860	0.4823	0.0213	+-	0.0107	0.0442	+-	0.0258	8.968
74	Gelsemium_elegans|scaffold11338	Gelsemium_sempervirens|C249323	0.2612	0.0102	+-	0.0072	0.0391	+-	0.0227	8.9985
74	Saururus_cernuus|C194248	Saururus_chinensis|C236687	0.4349	0.0055	+-	0.0055	0.0126	+-	0.0126	8.5509
75	Calycanthus_chinensis|C382114	Calycanthus_occidentalis|C375664	0.0932	0.0041	+-	0.0024	0.0444	+-	0.0158	4.6742
75	Convallaria_lmajalis|C660552	Convallaria_majalis|scaffold41252	0.0643	0.0015	+-	0.0015	0.0231	+-	0.0104	3.1878
75	Cornus_ellipica|C544206	Cornus_florida|C388318	0.3413	0.0122	+-	0.0046	0.0356	+-	0.0147	10.6664
75	Dysosma_pleiantha|scaffold29887	Dysosma_versipellis|scaffold22538	0.2747	0.0082	+-	0.0033	0.0297	+-	0.0106	2.5943
75	Hamamelis_japonica|C376066	Hamamelis_vernalis|C318294	0.2856	0.0082	+-	0.0034	0.0287	+-	0.0103	5.5288
75	Liquidambar_styraciflua|scaffold21368	Liquidambar_formosana|scaffold22237	0.1902	0.0027	+-	0.0027	0.0141	+-	0.01	3.6581
75	Liriodendron_chinense|C813163	Liriodendron_tulipifera|C440797	0.2418	0.0033	+-	0.0023	0.0135	+-	0.0078	1.6912
75	Meehania_cordata|scaffold13736	Meehania_fargesii|C369604	0.3685	0.0172	+-	0.0049	0.0467	+-	0.014	4.4223
75	Nelumbo_lutea|C244525	Nelumbo_nucifera|C276808	0.4289	0.0039	+-	0.0022	0.009	+-	0.0064	3.3116
75	Penthorum_chinense|C218076	Penthorum_sedoides|C205489	0.3618	0.0057	+-	0.0028	0.0157	+-	0.0079	2.8522
75	Phryma_Aleptostachya|C482480	Phryma_leptostachya|C354029	0.1887	0.005	+-	0.0029	0.0265	+-	0.0109	3.5623
75	Sassafras_albidum|C467051	Sassafras_tzumu|C403102	0.1469	0.0038	+-	0.0022	0.0261	+-	0.0107	3.6748
75	Saururus_cernuus|C206271	Saururus_chinensis|C264666	0.2945	0.0096	+-	0.0056	0.0327	+-	0.019	8.5509
76	Calycanthus_chinensis|C343823	Calycanthus_occidentalis|C285989	0.3697	0.0072	+-	0.0072	0.0194	+-	0.0195	4.6742
76	Convallaria_lmajalis|C626750	Convallaria_majalis|C757203	0.132	0.0041	+-	0.0041	0.0312	+-	0.0181	3.1878
76	Dysosma_pleiantha|scaffold21520	Dysosma_versipellis|scaffold27959	0.1386	0.0045	+-	0.0045	0.0321	+-	0.0187	2.5943
76	Hamamelis_japonica|C346318	Hamamelis_vernalis|C289881	0.1031	0.005	+-	0.005	0.0487	+-	0.0245	5.5288
76	Liquidambar_styraciflua|C395820	Liquidambar_formosana|C563530	0.4128	0.005	+-	0.005	0.0122	+-	0.0122	3.6581
76	Sassafras_albidum|C384519	Sassafras_tzumu|C339399	0.1781	0.0051	+-	0.0051	0.0288	+-	0.0204	3.6748
76	Saururus_cernuus|scaffold8765	Saururus_chinensis|C220089	0.1482	0.0084	+-	0.0059	0.0565	+-	0.0258	8.5509
77	Croomia_japonica|C821214	Croomia_paueiflora|C451480	0.0554	0.005	+-	0.0035	0.0899	+-	0.0292	8.968
77	Gelsemium_elegans|C195548	Gelsemium_sempervirens|C244581	0.1557	0.0054	+-	0.0038	0.0345	+-	0.0155	8.9985
77	Hamamelis_japonica|scaffold1609	Hamamelis_vernalis|C302949	0.19	0.008	+-	0.0046	0.0423	+-	0.0176	5.5288
77	Nelumbo_lutea|C229155	Nelumbo_nucifera|C264536	0.2481	0.0054	+-	0.0038	0.0216	+-	0.0125	3.3116
77	Saururus_cernuus|C222158	Saururus_chinensis|C257173	0.0905	0.0027	+-	0.0027	0.0294	+-	0.0148	8.5509
78	Calycanthus_chinensis|C373172	Calycanthus_occidentalis|C365085	0.1966	0.0028	+-	0.0028	0.014	+-	0.01	4.6742
78	Campsis_grandiflora|C480934	Campsis_radicans|scaffold21180	0.0822	0.0051	+-	0.0036	0.0615	+-	0.0236	3.0412
78	Cornus_alternifolia|scaffold7061	Cornus_controversa|scaffold13408	0.3492	0.0082	+-	0.0041	0.0236	+-	0.0119	3.2374
78	Cornus_ellipica|C525354	Cornus_florida|C387136	0.25	0.0148	+-	0.0056	0.0591	+-	0.0192	10.6664
78	Cotinus_coggygria|C365111	Cotinus_obovatus|C342516	0.2742	0.0043	+-	0.0031	0.0157	+-	0.0091	1.893
78	Croomia_japonica|scaffold518	Croomia_paueiflora|C462720	0.0692	0.0056	+-	0.0032	0.0808	+-	0.0249	8.968
78	Dysosma_pleiantha|C719344	Dysosma_versipellis|C753400	0.3933	0.0064	+-	0.0037	0.0164	+-	0.0095	2.5943
78	Gelsemium_elegans|C205259	Gelsemium_sempervirens|C253672	0.2005	0.0105	+-	0.0047	0.0523	+-	0.0177	8.9985
78	Hamamelis_japonica|scaffold7519	Hamamelis_vernalis|C314422	0.1731	0.0121	+-	0.005	0.0699	+-	0.0216	5.5288
78	Liquidambar_styraciflua|C424938	Liquidambar_formosana|scaffold14865	0.1034	0.0044	+-	0.0031	0.0425	+-	0.0152	3.6581
78	Meehania_cordata|C241141	Meehania_fargesii|C359352	0.1412	0.0065	+-	0.0037	0.0457	+-	0.0164	4.4223
78	Phryma_Aleptostachya|C476760	Phryma_leptostachya|C351647	0.03	0.0019	+-	0.0019	0.0627	+-	0.0201	3.5623
78	Sassafras_albidum|scaffold12451	Sassafras_tzumu|scaffold7984	0.2837	0.0072	+-	0.0036	0.0255	+-	0.0128	3.6748
78	Saururus_cernuus|C216002	Saururus_chinensis|C253031	0.3186	0.0105	+-	0.0053	0.0329	+-	0.0148	8.5509
79	Calycanthus_chinensis|C383832	Calycanthus_occidentalis|C378360	0.0562	0.0016	+-	0.0016	0.028	+-	0.0126	4.6742
79	Cornus_alternifolia|scaffold21748	Cornus_controversa|C396668	0.1308	0.0015	+-	0.0015	0.0113	+-	0.0065	3.2374
79	Cotinus_coggygria|C364711	Cotinus_obovatus|C345314	0.3973	0.0047	+-	0.0027	0.0117	+-	0.0068	1.893
79	Dysosma_pleiantha|C719334	Dysosma_versipellis|C754682	0.0969	0.0015	+-	0.0015	0.0157	+-	0.0079	2.5943
79	Gelsemium_elegans|C207173	Gelsemium_sempervirens|C260082	0.1168	0.0106	+-	0.0043	0.0905	+-	0.0227	8.9985
79	Meehania_cordata|C250291	Meehania_fargesii|C366628	0.1288	0.0029	+-	0.0021	0.0228	+-	0.0094	4.4223
79	Nelumbo_lutea|C248483	Nelumbo_nucifera|C275698	0.2101	0.0029	+-	0.002	0.0137	+-	0.0079	3.3116
79	Penthorum_chinense|C213588	Penthorum_sedoides|C201967	0.1966	0.0046	+-	0.0027	0.0234	+-	0.0096	2.8522
79	Phryma_Aleptostachya|C484456	Phryma_leptostachya|C355900	0.3703	0.0044	+-	0.0025	0.0118	+-	0.0069	3.5623
79	Sassafras_albidum|C474857	Sassafras_tzumu|C402298	0.1386	0.003	+-	0.0021	0.0214	+-	0.0096	3.6748
79	Saururus_cernuus|scaffold5919	Saururus_chinensis|C262408	0.2288	0.0102	+-	0.0038	0.0444	+-	0.0143	8.5509
