# Supplementary material for: Natural selection and repeated patterns of molecular evolution following allopatric divergence
Source: eLife. 2019 Aug 2;8:e45199. doi: 10.7554/eLife.45199 (PMC6744222; doi:10.7554/eLife.45199)
Supplement: Supplementary file 9. [file elife-45199-supp9.xlsx]

## Sheet: Sheet1
Genera	Orthologs	Ka/Ks	Ka	Ks	Gene name	GO Biological Process	GO Cellular Component	GO Molecular Function
Acorus	Genefamily5515	4.5248	2.496	0.5516	organic cation carnitine transporter 4	fatty acid beta-oxidation;toxin catabolic process;response to cyclopentenone;nitrate transport;para-aminobenzoic acid metabolic process;transmembrane transport	chloroplast thylakoid membrane;plant-type vacuole membrane;integral component of membrane	substrate-specific transmembrane transporter activity
Acorus	Genefamily5400	2.0772	0.0217	0.0104	E3 ubiquitin- ligase MARCH11 isoform X1		integral component of membrane	zinc ion binding
Acorus	Genefamily8962	2.0068	0.027	0.0134	PREDICTED: uncharacterized protein LOC105167377	photorespiration	integral component of membrane
Acorus	Genefamily8607	5.8158	0.0763	0.0131	RING FYVE PHD zinc finger superfamily , isoform 1		integral component of membrane	DNA binding;zinc ion binding
Acorus	Genefamily7539	2.1756	2.3248	1.0686	S-adenosyl-L-methionine-dependent methyltransferase	methylation	integral component of membrane	methyltransferase activity
Acorus	Genefamily8780	2.1451	0.0326	0.0152	UPF0057 membrane At4g30660-like		integral component of membrane
Acorus	Genefamily12396	4.761	0.0566	0.0119	cytochrome P450 98A2	lignin biosynthetic process;oxidation-reduction process	integral component of membrane	iron ion binding;flavonoid 3'-monooxygenase activity;heme binding
Acorus	Genefamily8833	3.2939	0.0372	0.0113	dolichyl-diphosphooligosaccharide-- glycosyltransferase subunit 4A		integral component of membrane
Acorus	Genefamily5797	2.0222	1.4668	0.7253	hypothetical protein MTR_5g097970	leaf morphogenesis;cell differentiation;positive regulation of transcription, DNA-templated	integral component of membrane
Acorus	Genefamily7897	2.2996	0.0242	0.0105	magnesium transporter MRS2-1-like	metal ion transport;transmembrane transport	integral component of membrane	metal ion transmembrane transporter activity
Acorus	Genefamily8094	2.8927	0.0619	0.0214	PREDICTED: uncharacterized protein LOC4329446		integral component of membrane;cytoplasmic, membrane-bounded vesicle
Acorus	Genefamily7370	3.6926	0.2322	0.0629	40S ribosomal S11	translation	ribosome;integral component of membrane	structural constituent of ribosome
Calycanthus	Genefamily7612	2.7655	0.0175	0.0063	PREDICTED: uncharacterized protein LOC104601362	single-organism cellular process;single-organism developmental process	chloroplast;integral component of membrane
Calycanthus	Genefamily8822	2.0322	0.0505	0.0248	cytosolic malate dehydrogenase, partial	carbohydrate metabolic process;tricarboxylic acid cycle;malate metabolic process	cytoplasm;integral component of membrane	L-malate dehydrogenase activity
Calycanthus	Genefamily7669	2.0911	0.0156	0.0075	probable peroxygenase 4		integral component of membrane
Calycanthus	Genefamily8259	3.0574	0.0121	0.0039	Tobamovirus multiplication 3 isoform 1		integral component of membrane
Calycanthus	Genefamily10049	3.0285	0.0235	0.0078	PREDICTED: uncharacterized protein LOC103496842		integral component of membrane
Calycanthus	Genefamily11734	2.5931	0.0242	0.0093	PREDICTED: uncharacterized protein LOC104597596	response to oxidative stress	integral component of membrane
Calycanthus	Genefamily12818	2.1567	0.0089	0.0041	delta(7)-sterol-C5(6)-desaturase 1-like [Tarenaya hassleriana]	fatty acid biosynthetic process;oxidation-reduction process	integral component of membrane	iron ion binding;oxidoreductase activity
Calycanthus	Genefamily12997	3.4564	0.0183	0.0053	peroxisomal membrane 11A	peroxisome fission;regulation of peroxisome size	integral component of peroxisomal membrane	identical protein binding
Calycanthus	Genefamily8002	2.0147	0.0076	0.0037	Lipid phosphate phosphatase 2 isoform 2	phospholipid metabolic process;abscisic acid-activated signaling pathway;dephosphorylation;oxidation-reduction process	integral component of plasma membrane	acid phosphatase activity;phosphatidate phosphatase activity;2-alkenal reductase [NAD(P)] activity
Calycanthus	Genefamily13773	2.0556	0.0084	0.0041	cytochrome c biogenesis Fn (mitochondrion)	heme transport;cytochrome complex assembly	mitochondrion;integral component of membrane	heme transporter activity;heme binding
Calycanthus	Genefamily7727	2.1507	0.0182	0.0084	NAD(P)-binding Rossmann-fold superfamily isoform 1	metabolic process	plastid;integral component of membrane	small protein activating enzyme activity
Calycanthus	Genefamily10612	2.2511	2.0174	0.8962	transport Sec61 subunit beta	intracellular protein transport	Sec61 translocon complex;Golgi apparatus;plasma membrane;integral component of membrane
Calycanthus	Genefamily11882	2.5296	0.0275	0.0109	microsomal glutathione S-transferase 3	ER to Golgi vesicle-mediated transport;metabolic process;cellular oxidant detoxification	vacuole;endoplasmic reticulum;Golgi apparatus;integral component of membrane;cytoplasmic, membrane-bounded vesicle	glutathione transferase activity;glutathione peroxidase activity
Campsis	Genefamily15397	10.0104	0.2584	0.0258	3-isopropylmalate dehydratase	carbohydrate metabolic process;leucine biosynthetic process	3-isopropylmalate dehydratase complex;integral component of membrane	3-isopropylmalate dehydratase activity;phospho-N-acetylmuramoyl-pentapeptide-transferase activity;4 iron, 4 sulfur cluster binding
Campsis	Genefamily9654	2.2053	0.0165	0.0075	trichome birefringence-like 25		integral component of membrane
Campsis	Genefamily11245	2.3075	0.0099	0.0043	bet1-like SNARE 1-1 isoform X1		integral component of membrane
Campsis	Genefamily13774	3.4322	0.0124	0.0036	heptahelical transmembrane 2-like		integral component of membrane
Campsis	Genefamily14617	2.6788	0.0175	0.0065	Zinc finger matrin-type 1, isoform 1		integral component of membrane
Campsis	Genefamily18919	3.0286	0.0123	0.0041	cysteine-rich repeat secretory 11		integral component of membrane
Campsis	Genefamily11655	2.501	0.0278	0.0111	RTE1 isoform 1	phosphatidylinositol biosynthetic process	integral component of membrane
Campsis	Genefamily16291	3.6726	1.1402	0.3104	solute carrier family 25 member 44-like	transmembrane transport	integral component of membrane
Campsis	Genefamily12580	6.3746	0.2371	0.0372	peptidyl-prolyl cis-trans isomerase H	protein peptidyl-prolyl isomerization;protein folding	integral component of membrane	peptidyl-prolyl cis-trans isomerase activity
Campsis	Genefamily15299	3.1318	0.0626	0.02	Calmodulin binding ,	response to auxin;response to nitrate;nitrate transport	integral component of membrane
Campsis	Genefamily18753	5.5645	0.0156	0.0028	mitochondrial carrier MTM1	translation;transmembrane transport	integral component of membrane	structural constituent of ribosome
Campsis	Genefamily11580	2.3045	0.0331	0.0144	transmembrane		vacuolar membrane;integral component of membrane
Convallaria	Genefamily23377	3.8707	0.0088	0.0023	PREDICTED: uncharacterized protein LOC103981779		chloroplast envelope;integral component of membrane
Convallaria	Genefamily13978	2.2834	0.0227	0.0099	reticulon B21 isoform X1		endoplasmic reticulum membrane;integral component of membrane
Convallaria	Genefamily10129	2.5487	1.5645	0.6139	long chain base biosynthesis 2a-like	biosynthetic process	integral component of membrane	transferase activity;pyridoxal phosphate binding
Convallaria	Genefamily13227	2.3894	2.3175	0.9699	Os07g0299600, partial	phosphatidylinositol biosynthetic process;proline transport	integral component of membrane
Convallaria	Genefamily14586	3.3702	0.0055	0.0016	DDB1- and CUL4-associated factor 4	amino acid transmembrane transport	integral component of membrane	amino acid transmembrane transporter activity
Convallaria	Genefamily19790	2.5067	0.0256	0.0102	signal peptide peptidase-like 5 isoform X2	proteolysis	integral component of membrane	aspartic-type endopeptidase activity
Convallaria	Genefamily14393	2.5908	0.0194	0.0075	sphinganine C(4)-monooxygenase 1-like	fatty acid biosynthetic process;oxidation-reduction process	integral component of membrane;cytoplasmic, membrane-bounded vesicle	iron ion binding;oxidoreductase activity
Convallaria	Genefamily11046	3.3578	1.2767	0.3802	probable signal peptidase complex subunit 2	signal peptide processing	signal peptidase complex;integral component of membrane	peptidase activity
Cornus_1	Genefamily12570	2.4926	0.0472	0.0189	Exostosin family	actin filament-based movement	cell wall;integral component of membrane
Cornus_1	Genefamily15859	2.1963	0.0115	0.0052	TIC 20-v, chloroplastic		chloroplast thylakoid membrane;integral component of membrane
Cornus_1	Genefamily19690	2.0346	0.0272	0.0134	argonaute 7	translational initiation;vegetative phase change;production of ta-siRNAs involved in RNA interference;production of lsiRNA involved in RNA interference;gene silencing by miRNA;regulation of development, heterochronic	cytoplasm;integral component of membrane	translation initiation factor activity
Cornus_1	Genefamily7855	2.4627	0.0369	0.015	PREDICTED: uncharacterized protein LOC103496842		integral component of membrane
Cornus_1	Genefamily10238	3.4176	2.2633	0.6623	ABC transporter G family member 11	metabolic process;organic phosphonate transport;organophosphate ester transport	integral component of membrane	ATP binding;organic phosphonate transmembrane-transporting ATPase activity
Cornus_1	Genefamily10879	2.1097	0.0248	0.0118	proline-rich receptor kinase PERK9	protein phosphorylation	integral component of membrane	protein serine/threonine kinase activity;ATP binding
Cornus_1	Genefamily11020	2.1167	1.294	0.6113	MATE efflux family	drug transmembrane transport	integral component of membrane	drug transmembrane transporter activity;antiporter activity
Cornus_1	Genefamily12037	2.4751	0.9223	0.3726	galactose oxidase		integral component of membrane
Cornus_1	Genefamily12651	2.0159	1.7627	0.8744	gag-pol, partial	proteolysis;DNA integration	integral component of membrane	nucleic acid binding;aspartic-type endopeptidase activity;zinc ion binding
Cornus_1	Genefamily12944	3.3421	0.0479	0.0143	disease resistance (TIR-NBS-LRR class),	defense response;signal transduction	integral component of membrane	ADP binding
Cornus_1	Genefamily15232	2.1617	0.0364	0.0168	elongation of fatty acids 3-like		integral component of membrane
Cornus_1	Genefamily15350	2.061	0.0118	0.0057	heparan-alpha-glucosaminide N-acetyltransferase-like		integral component of membrane
Cornus_1	Genefamily15730	2.1375	0.0275	0.0129	PREDICTED: uncharacterized protein LOC105136223	photorespiration	integral component of membrane
Cornus_1	Genefamily15780	2.783	0.0227	0.0082	piezo-type mechanosensitive ion channel homolog isoform X2	ion transmembrane transport	integral component of membrane	mechanically-gated ion channel activity
Cornus_1	Genefamily15978	3.7985	1.9792	0.521	QUIRKY-like [Erythranthe guttata]		integral component of membrane
Cornus_1	Genefamily12957	4.8897	0.0468	0.0096	sulfate transporter -like	sulfate transmembrane transport	integral component of plasma membrane	secondary active sulfate transmembrane transporter activity
Cornus_1	Genefamily12522	2.6125	0.0606	0.0232	calcium-transporting ATPase 8, plasma membrane-type-like	metabolic process;calcium ion transmembrane transport	integral component of plasma membrane;intracellular membrane-bounded organelle	calcium-transporting ATPase activity;calmodulin binding;ATP binding;metal ion binding
Cornus_1	Genefamily12404	2.5989	1.786	0.6872	nucleoside diphosphate kinase	GTP biosynthetic process;UTP biosynthetic process;CTP biosynthetic process;cellular response to DNA damage stimulus;CDP phosphorylation	nucleus;mitochondrial intermembrane space;cytosol;integral component of membrane	nucleoside diphosphate kinase activity;ATP binding;identical protein binding
Cornus_1	Genefamily9553	3.0053	0.0369	0.0123	pleiotropic drug resistance 3-like	metabolic process;transmembrane transport	plasma membrane;integral component of membrane	ATP binding;ATPase activity, coupled to transmembrane movement of substances
Cornus_1	Genefamily15977	3.7985	1.9792	0.521	signal peptidase complex subunit 3B	signal peptide processing	signal peptidase complex;integral component of membrane	peptidase activity
Cornus_2	Genefamily16911	3.001	0.01	0.0033	argonaute 7	vegetative phase change;production of ta-siRNAs involved in RNA interference;production of lsiRNA involved in RNA interference;gene silencing by miRNA;regulation of development, heterochronic	cytoplasm;integral component of membrane	nucleic acid binding
Cornus_2	Genefamily16192	2.3996	0.0107	0.0045	cysteine ase inhibitor 12	hyperosmotic response;response to oxidative stress;response to cold;response to water deprivation;negative regulation of endopeptidase activity	endoplasmic reticulum;cytosol;integral component of membrane	cysteine-type endopeptidase inhibitor activity;cobalt ion binding
Cornus_2	Genefamily6441	3.1016	1.7245	0.556	aluminum-activated malate transporter 13-like	malate transport	integral component of membrane
Cornus_2	Genefamily10420	2.3625	0.0094	0.004	dentin sialophospho		integral component of membrane
Cornus_2	Genefamily10655	2.5785	0.0104	0.004	probable prolyl 4-hydroxylase 9	oxidation-reduction process	integral component of membrane	iron ion binding;oxidoreductase activity, acting on paired donors, with incorporation or reduction of molecular oxygen;L-ascorbic acid binding
Cornus_2	Genefamily11574	2.8336	0.8381	0.2958	cysteine-rich repeat secretory 3		integral component of membrane
Cornus_2	Genefamily14744	2.2341	0.0136	0.0061	S-adenosyl-L-methionine-dependent methyltransferases superfamily	methylation	integral component of membrane	methyltransferase activity
Cornus_2	Genefamily15048	4.2792	0.0225	0.0053	Concanavalin A-like lectin kinase family ,	protein phosphorylation;regulation of cell cycle	integral component of membrane	cyclin-dependent protein serine/threonine kinase activity;ATP binding;carbohydrate binding
Cornus_2	Genefamily17011	3.6616	0.012	0.0033	LMBR1 domain-containing 2 homolog A	positive regulation of cell proliferation	integral component of membrane
Cornus_2	Genefamily13058	2.2139	1.2977	0.5862	aluminum-activated malate transporter 4-like	malate transmembrane transport	plant-type vacuole membrane;integral component of membrane	malate transmembrane transporter activity
Cornus_2	Genefamily16168	3.0227	0.0054	0.0018	WAT1-related At5g64700	transmembrane transport	plasma membrane;integral component of membrane	transmembrane transporter activity
Cornus_2	Genefamily12993	7.1213	0.0869	0.0122	inactive rhomboid 1-like	proteolysis	plasma membrane;plasmodesma;integral component of membrane	serine-type endopeptidase activity
Cotinus	Genefamily19159	2.0503	0.0053	0.0026	protochlorophyllide-dependent translocon component 52, chloroplastic	oxidation-reduction process	chloroplast envelope;integral component of membrane	chlorophyllide a oxygenase [overall] activity;metal ion binding;2 iron, 2 sulfur cluster binding
Cotinus	Genefamily7856	2.111	0.0123	0.0058	lipid phosphate phosphatase epsilon 2, chloroplastic	diacylglycerol biosynthetic process;dephosphorylation	chloroplast;integral component of membrane	phosphatidate phosphatase activity
Cotinus	Genefamily9598	3.408	0.0044	0.0013	Transducin family WD-40 repeat family , isoform 1	vesicle-mediated transport;regulation of exocytosis;positive regulation of GTPase activity	cytoplasm;plasma membrane;integral component of membrane	GTPase activator activity;Rab GTPase binding;syntaxin binding
Cotinus	Genefamily7419	2.7884	0.0059	0.0021	threonylcarbamoyladenosine tRNA methylthiotransferase	RNA modification	endoplasmic reticulum;integral component of membrane	transferase activity;4 iron, 4 sulfur cluster binding
Cotinus	Genefamily18332	2.3442	0.0076	0.0033	RHOMBOID 5	proteolysis	Golgi apparatus;integral component of membrane	serine-type endopeptidase activity
Cotinus	Genefamily7867	2.065	0.0088	0.0043	hypothetical protein CICLE_v10033883mg	dephosphorylation	integral component of membrane	acid phosphatase activity
Cotinus	Genefamily9748	2.2709	0.0103	0.0046	zinc finger family		integral component of membrane	metal ion binding
Cotinus	Genefamily15146	2.1995	0.032	0.0146	G-type lectin S-receptor-like serine threonine- kinase RLK1	protein phosphorylation	integral component of membrane	protein serine/threonine kinase activity;ATP binding
Cotinus	Genefamily15435	3.5553	0.0212	0.006	vacuolar cation proton exchanger 2	calcium ion transmembrane transport	integral component of membrane	calcium:proton antiporter activity
Cotinus	Genefamily15660	2.5484	0.0201	0.0079	UNC93 1		integral component of membrane
Cotinus	Genefamily16234	2.2415	0.01	0.0045	TOX high mobility group box family member 4-A, isoform 1		integral component of membrane
Cotinus	Genefamily16279	3.7952	0.029	0.0076	non-specific lipid transfer GPI-anchored 1-like		integral component of membrane
Cotinus	Genefamily18331	2.3442	0.0076	0.0033	RING U-box superfamily isoform 1	metabolic process	integral component of membrane	zinc ion binding;ligase activity
Cotinus	Genefamily19079	2.1805	0.0075	0.0034	RING-H2 finger ATL65		integral component of membrane	zinc ion binding
Cotinus	Genefamily6679	2.3876	0.0117	0.0049	PREDICTED: uncharacterized protein LOC102629601 isoform X4		integral component of nuclear inner membrane;endoplasmic reticulum
Cotinus	Genefamily13257	2.4806	0.9154	0.369	light-harvesting chlorophyll a b-binding	response to light stimulus;photosynthesis, light harvesting in photosystem I;protein-chromophore linkage	photosystem I;photosystem II;chloroplast thylakoid membrane;chloroplast envelope;plastoglobule;integral component of membrane	chlorophyll binding;pigment binding;metal ion binding
Cotinus	Genefamily9207	2.7488	0.0118	0.0043	Late embryogenesis abundant hydroxyproline-rich glyco family,		plasma membrane;plasmodesma;integral component of membrane
Cotinus	Genefamily16257	2.4876	1.546	0.6215	Peroxygenase 2 isoform 1	response to water deprivation;stomatal movement;oxylipin metabolic process;hyperosmotic salinity response	vacuole;integral component of membrane	calcium ion binding
Croomia	Genefamily11702	2.2869	0.0486	0.0213	immunophilin family		chloroplast;integral component of membrane
Croomia	Genefamily19875	6.3735	0.0791	0.0124	small multi-drug export , , expressed		chloroplast;integral component of membrane
Croomia	Genefamily18189	2.5085	0.253	0.1008	3-deoxy-manno-octulosonate cytidylyltransferase, mitochondrial	metabolic process	cytoplasm;integral component of membrane	3-deoxy-manno-octulosonate cytidylyltransferase activity
Croomia	Genefamily12495	3.8573	0.0452	0.0117	transport Sec61 subunit gamma-like	protein targeting;proline transport;protein transmembrane transport	endoplasmic reticulum membrane;plasma membrane;integral component of membrane	P-P-bond-hydrolysis-driven protein transmembrane transporter activity
Croomia	Genefamily20915	5.1218	0.0577	0.0113	anthranilate phosphoribosyltransferase	metabolic process;determination of bilateral symmetry;polarity specification of adaxial/abaxial axis;meristem initiation;regulation of meristem growth	endoplasmic reticulum;plasma membrane;plasmodesma;integral component of membrane	calcium ion binding;calcium-dependent phospholipid binding;transferase activity, transferring glycosyl groups
Croomia	Genefamily17716	2.9179	0.0328	0.0112	UDP-glucuronate 4-epimerase 6-like	carbohydrate metabolic process;tryptophan catabolic process;indoleacetic acid biosynthetic process	endosome;trans-Golgi network;integral component of membrane	racemase and epimerase activity, acting on carbohydrates and derivatives;coenzyme binding
Croomia	Genefamily17368	2.4333	0.0322	0.0132	dolichol phosphate-mannose biosynthesis regulatory	GPI anchor biosynthetic process;dolichol metabolic process;protein O-linked mannosylation;regulation of catalytic activity	integral component of endoplasmic reticulum membrane;dolichol-phosphate-mannose synthase complex	dolichyl-phosphate beta-D-mannosyltransferase activity;enzyme regulator activity
Croomia	Genefamily9785	2.7759	1.3855	0.4991	cation H(+) antiporter 15	regulation of pH;plant-type cell wall modification;pollen tube growth;hydrogen ion transmembrane transport	integral component of membrane	solute:proton antiporter activity
Croomia	Genefamily10239	3.5261	0.0283	0.008	probable sugar phosphate phosphate translocator At1g12500	carbohydrate transport;plant-type cell wall biogenesis;cell growth;cellulose metabolic process	integral component of membrane
Croomia	Genefamily10687	6.2014	0.0579	0.0093	DEAD-box ATP-dependent RNA helicase 40	metabolic process	integral component of membrane	nucleic acid binding;helicase activity;ATP binding
Croomia	Genefamily11201	2.0282	0.0239	0.0118	3-ketoacyl- synthase 1-like	fatty acid biosynthetic process	integral component of membrane	transferase activity, transferring acyl groups other than amino-acyl groups
Croomia	Genefamily11280	2.0114	0.0224	0.0111	probable folate-biopterin transporter 2	transport	integral component of membrane
Croomia	Genefamily14688	2.3614	0.0559	0.0237	RING-H2 finger ATL67-like	methylation	integral component of membrane	methyltransferase activity;zinc ion binding;ligase activity
Croomia	Genefamily14922	7.7014	0.2225	0.0289	cellulose synthase D1	pollen germination;cellulose biosynthetic process;cell wall organization	integral component of membrane	cellulose synthase (UDP-forming) activity
Croomia	Genefamily14997	2.383	0.1866	0.0783	plasma membrane proteolipid 3		integral component of membrane
Croomia	Genefamily15317	2.2119	2.2818	1.0316	ABC transporter G family member 6-like	metabolic process	integral component of membrane	ATP binding;ATPase activity
Croomia	Genefamily16820	7.7317	0.0602	0.0078	NRT1 PTR FAMILY -like	transport	integral component of membrane	transporter activity
Croomia	Genefamily16904	10.2443	0.0754	0.0074	RING-H2 finger ATL80-like	single-multicellular organism process;single-organism developmental process	integral component of membrane	zinc ion binding
Croomia	Genefamily16932	2.4636	0.0432	0.0175	ATP binding		integral component of membrane
Croomia	Genefamily17489	2.4973	0.3042	0.1218	upf0591 membrane		integral component of membrane
Croomia	Genefamily18992	5.5075	0.0876	0.0159	heptahelical transmembrane 4-like	response to hormone	integral component of membrane
Croomia	Genefamily18074	6.553	0.0481	0.0073	TIC 20-II, chloroplastic		integral component of membrane;intracellular membrane-bounded organelle;cytoplasmic part
Croomia	Genefamily11867	3.1033	0.0304	0.0098	PREDICTED: uncharacterized protein At2g27730, mitochondrial	cellular metabolic process	integral component of membrane;mitochondrial membrane;respiratory chain complex I
Croomia	Genefamily17156	2.7991	1.41	0.5037	NADH dehydrogenase [ubiquinone] 1 alpha subcomplex subunit 1	ubiquitin-dependent protein catabolic process;photorespiration;response to misfolded protein;proteasome core complex assembly	mitochondrial respiratory chain complex I;integral component of membrane
Croomia	Genefamily12035	7.7227	0.0433	0.0056	probable aquaporin TIP1-1	water transport;glycerol transport;ion transmembrane transport	plant-type vacuole membrane;integral component of membrane;central vacuole	water channel activity;glycerol channel activity
Croomia	Genefamily17601	2.3211	0.0229	0.0099	transport Sec61 subunit beta-like	intracellular protein transport	Sec61 translocon complex;integral component of membrane
Dysosma	Genefamily17130	2.1592	0.0056	0.0026	probable sugar phosphate phosphate translocator At1g06470	carbohydrate transport;UDP-glucose transport	endoplasmic reticulum-Golgi intermediate compartment;integral component of membrane
Dysosma	Genefamily16657	2.552	0.0062	0.0024	DUF21 domain-containing At1g47330	methylation	endosome;trans-Golgi network;plasma membrane;integral component of membrane	methyltransferase activity
Dysosma	Genefamily7105	2.111	0.0209	0.0099	1-acyl-sn-glycerol-3-phosphate acyltransferase delta isoform 1	photosystem II assembly	integral component of membrane	transferase activity, transferring acyl groups
Dysosma	Genefamily8010	4.2414	0.0209	0.0049	tetraspanin-10 isoform X1		integral component of membrane
Dysosma	Genefamily15358	2.0762	0.0061	0.0029	probable glycosyltransferase At3g07620 isoform X1		integral component of membrane
Dysosma	Genefamily16382	2.0502	0.0088	0.0043	transmembrane 45B-like		integral component of membrane
Dysosma	Genefamily15625	2.5815	0.0068	0.0026	ATP-dependent zinc metalloprotease FTSH 6, chloroplastic	proteolysis;thylakoid membrane organization;photoinhibition;photosystem II repair;PSII associated light-harvesting complex II catabolic process	mitochondrion;chloroplast thylakoid membrane;chloroplast envelope;integral component of membrane	ATP-dependent peptidase activity;metalloendopeptidase activity;ATP binding;zinc ion binding
Gelsemium	Genefamily11448	2.6254	0.0335	0.0128	unnamed protein product		chloroplast envelope;integral component of membrane
Gelsemium	Genefamily9406	8.2245	0.1766	0.0215	inorganic pyrophosphatase	phosphate-containing compound metabolic process;ATP hydrolysis coupled proton transport	cytoplasm;integral component of membrane;proton-transporting V-type ATPase, V0 domain	magnesium ion binding;inorganic diphosphatase activity;hydrogen ion transmembrane transporter activity
Gelsemium	Genefamily8524	2.3653	1.836	0.7762	plasma membrane proteolipid 3		cytoplasm;plasma membrane;integral component of membrane
Gelsemium	Genefamily10464	2.2368	0.8171	0.3653	CASP 4B1	iron-sulfur cluster assembly	cytosol;plasma membrane;integral component of membrane	NADH dehydrogenase activity;iron-sulfur cluster binding
Gelsemium	Genefamily13225	2.1889	0.0317	0.0145	LAG1 longevity assurance homolog 3-like		endoplasmic reticulum;integral component of membrane
Gelsemium	Genefamily9277	2.0303	0.0408	0.0201	deoxyribonuclease tatdn3-A	DNA metabolic process	integral component of membrane	endodeoxyribonuclease activity, producing 5'-phosphomonoesters
Gelsemium	Genefamily8214	2.9387	0.1111	0.0378	40S ribosomal S22	translation	ribosome;integral component of membrane	structural constituent of ribosome
Hamamelis	Genefamily16321	2.1635	0.0356	0.0164	Amino acid permease 3	amino acid transmembrane transport;protein targeting to membrane;nucleotide transport;ER to Golgi vesicle-mediated transport;regulation of plant-type hypersensitive response;ammonium transport;basic amino acid transport;negative regulation of programmed cell death;amino acid import;regulation of ion transport	cytoplasm;plasma membrane;integral component of membrane	amino acid transmembrane transporter activity
Hamamelis	Genefamily11876	5.715	0.2035	0.0356	ROOT HAIR DEFECTIVE 3 homolog 2-like	metabolic process	endoplasmic reticulum membrane;integral component of membrane	GTPase activity;GTP binding
Hamamelis	Genefamily7400	2.4767	0.0279	0.0113	PREDICTED: uncharacterized protein At2g27730, mitochondrial-like		integral component of membrane
Hamamelis	Genefamily11625	2.5363	0.0312	0.0123	receptor kinase At4g34220	protein phosphorylation	integral component of membrane	protein kinase activity;ATP binding
Hamamelis	Genefamily11729	2.1347	0.03	0.0141	Fanconi anemia group M isoform X2		integral component of membrane	organic cyclic compound binding;heterocyclic compound binding
Hamamelis	Genefamily11967	2.8117	0.3156	0.1122	hypothetical protein F383_16970		integral component of membrane
Hamamelis	Genefamily12199	3.3716	0.0706	0.0209	disease resistance (TIR-NBS-LRR class),	defense response;signal transduction	integral component of membrane	ATP binding;ADP binding
Hamamelis	Genefamily14244	3.7347	2.28	0.6105	pentatricopeptide repeat-containing At3g62890	transmembrane transport	integral component of membrane	zinc ion binding
Hamamelis	Genefamily14533	2.3931	0.0142	0.0059	cation transport regulator 2		integral component of membrane
Hamamelis	Genefamily15796	2.3214	0.0367	0.0158	PREDICTED: uncharacterized protein LOC103323789		integral component of membrane
Hamamelis	Genefamily16340	2.5333	0.0109	0.0043	Golgi apparatus membrane TVP38		integral component of membrane
Hamamelis	Genefamily14169	2.2894	0.0111	0.0049	Coiled-coil domain-containing 21, isoform 2, partial	transcription factor import into nucleus	intracellular;integral component of membrane
Hamamelis	Genefamily13178	3.111	0.0297	0.0095	RALF-like 34	syncytium formation;cell-cell signaling;calcium-mediated signaling	intracellular;plasmodesma;integral component of membrane;apoplast	signal transducer activity;hormone activity
Hamamelis	Genefamily14915	2.3775	0.0207	0.0087	membrane family	photosynthesis	photosystem II;integral component of membrane
Hamamelis	Genefamily12215	3.1848	0.029	0.0091	CASP 4C1		plasma membrane;integral component of membrane
Hamamelis	Genefamily6481	2.0519	0.0584	0.0285	cysteine-rich receptor kinase 10	protein phosphorylation;defense response	plasma membrane;plasmodesma;integral component of membrane	protein serine/threonine kinase activity;ATP binding
Liquidambar	Genefamily9820	2.5617	1.5575	0.608	callose synthase 7-like	(1->3)-beta-D-glucan biosynthetic process	1,3-beta-D-glucan synthase complex;integral component of membrane	1,3-beta-D-glucan synthase activity
Liquidambar	Genefamily11384	2.0385	0.2214	0.1086	1,3-beta-glucan synthase component FKS1	(1->3)-beta-D-glucan biosynthetic process	1,3-beta-D-glucan synthase complex;integral component of membrane	1,3-beta-D-glucan synthase activity
Liquidarnbar	Genefamily14263	2.0635	0.0556	0.027	polyprenol reductase 2-like	lipid metabolic process;oxidation-reduction process	cytoplasm;integral component of membrane	oxidoreductase activity, acting on the CH-CH group of donors
Liquidambar	Genefamily14334	5.1928	0.051	0.0098	uncharacterized protein LOC100500288	intracellular protein transport	endoplasmic reticulum;integral component of membrane
Liquidambar	Genefamily7558	2.9088	0.0297	0.0102	TMV resistance N-like	signal transduction	integral component of membrane
Liquidambar	Genefamily12335	2.6117	0.0493	0.0189	YIF1B isoform X2		integral component of membrane
Liquidambar	Genefamily14694	2.4867	0.0153	0.0061	Tetratricopeptide-like helical		integral component of membrane
Liquidambar	Genefamily14995	2.0982	0.0153	0.0073	lesion inducing family		integral component of membrane
Liquidambar	Genefamily15608	3.6016	0.0344	0.0096	copper transporter 1-like	copper ion transmembrane transport	integral component of membrane	copper ion transmembrane transporter activity
Liquidambar	Genefamily16226	2.1632	0.0315	0.0146	cold-regulated 413 inner membrane 2, chloroplastic		integral component of membrane
Liquidambar	Genefamily16702	2.7605	0.0141	0.0051	PREDICTED: uncharacterized protein LOC104592700		integral component of membrane
Liquidambar	Genefamily13547	2.4137	0.0373	0.0155	receptor kinase HSL1	response to molecule of bacterial origin;protein phosphorylation;protein targeting to membrane;signal transduction;positive regulation of flavonoid biosynthetic process;xylem and phloem pattern formation;stomatal complex morphogenesis;regulation of plant-type hypersensitive response;stamen development	intracellular;integral component of membrane	protein serine/threonine kinase activity;ATP binding
Liquidambar	Genefamily16097	2.5184	0.0169	0.0067	Localized to the inner membrane of the chloroplast	cysteine biosynthetic process	mitochondrion;chloroplast thylakoid membrane;chloroplast inner membrane;integral component of membrane
Liquidambar	Genefamily11904	2.265	0.0254	0.0112	CASP RCOM_1174750		plasma membrane;integral component of membrane
Liquidambar	Genefamily13408	2.7183	0.0375	0.0138	arabinogalactan peptide 16-like		plasma membrane;integral component of membrane;cytoplasmic, membrane-bounded vesicle;anchored component of membrane
Liriodendron	Genefamily15483	3.0124	1.473	0.489	IQ-DOMAIN 32	RNA-dependent DNA replication;arginyl-tRNA aminoacylation;protein phosphorylation	cytoplasm;integral component of membrane	DNA binding;RNA-directed DNA polymerase activity;protein serine/threonine kinase activity;arginine-tRNA ligase activity;ATP binding;zinc ion binding;protein-cysteine S-palmitoyltransferase activity
Liriodendron	Genefamily8739	2.0893	0.0315	0.0151	cleavage and polyadenylation specificity factor subunit 3-II	polar nucleus fusion	integral component of membrane	zinc ion binding
Liriodendron	Genefamily12833	3.1339	0.0426	0.0136	uncharacterized GPI-anchored At3g06035-like		integral component of membrane
Liriodendron	Genefamily9807	2.1903	0.0072	0.0033	transmembrane 33 homolog		mitochondrion;endoplasmic reticulum;plasmodesma;integral component of membrane
Liriodendron	Genefamily15189	5.8126	0.0915	0.0157	transport membrane , partial (mitochondrion)		mitochondrion;integral component of membrane
Liriodendron	Genefamily15260	2.2116	0.0415	0.0188	hypothetical protein VITISV_029384	carbohydrate metabolic process;DNA integration	nucleus;integral component of membrane	nucleic acid binding;hydrolase activity, hydrolyzing O-glycosyl compounds;zinc ion binding
Liriodendron	Genefamily16274	2.3047	0.0315	0.0137	zinc transporter 5-like	iron ion transport;water transport;cellular response to iron ion starvation;zinc II ion transmembrane transport	plasma membrane;integral component of membrane	zinc ion transmembrane transporter activity
Meehania	Genefamily12413	2.4419	0.0536	0.022	monothiol glutaredoxin-S5-like	cell redox homeostasis;oxidation-reduction process	cell;integral component of membrane	electron carrier activity;protein disulfide oxidoreductase activity
Meehania	Genefamily6524	2.1951	0.0105	0.0048	glucan endo-1,3-beta-glucosidase 4-like		integral component of membrane
Meehania	Genefamily11382	2.1505	1.0421	0.4846	G-type lectin S-receptor-like serine threonine- kinase At4g27290	protein phosphorylation;recognition of pollen	integral component of membrane	protein serine/threonine kinase activity;ATP binding
Meehania	Genefamily12308	3.8854	0.0434	0.0112	ABC transporter G family member 20-like	metabolic process;organic phosphonate transport;organophosphate ester transport	integral component of membrane	ATP binding;organic phosphonate transmembrane-transporting ATPase activity
Meehania	Genefamily12332	3.2282	1.9745	0.6116	G-type lectin S-receptor-like serine threonine- kinase SD2-2	protein phosphorylation;recognition of pollen	integral component of membrane	protein serine/threonine kinase activity;ATP binding
Meehania	Genefamily12641	2.2168	0.0328	0.0148	PREDICTED: uncharacterized protein LOC105962253		integral component of membrane
Meehania	Genefamily13175	4.4585	0.0653	0.0146	PREDICTED: uncharacterized protein LOC100246645		integral component of membrane
Meehania	Genefamily16392	3.0296	0.0103	0.0034	transmembrane 184C-like	transport	integral component of membrane	transporter activity
Meehania	Genefamily17290	4.453	0.0386	0.0087	uncharacterized GPI-anchored At4g28100		integral component of membrane;anchored component of plasma membrane
Meehania	Genefamily18080	4.3956	0.0196	0.0045	cytochrome c oxidase subunit 3 (mitochondrion)	aerobic electron transport chain;hydrogen ion transmembrane transport	mitochondrion;integral component of membrane	cytochrome-c oxidase activity
Menispermum	Genefamily12725	3.7352	0.0539	0.0144	IAA-alanine resistance 1	metal ion transport;transmembrane transport	integral component of membrane	metal ion transmembrane transporter activity
Menispermum	Genefamily14674	5.1072	0.0386	0.0076	LETM1 and EF-hand domain-containing 1, mitochondrial isoform X1		integral component of membrane	calcium ion binding
Menispermum	Genefamily14962	2.6638	0.032	0.012	probable E3 ubiquitin ligase SUD1 isoform X1	isoprenoid biosynthetic process;response to water deprivation;wax biosynthetic process;cutin biosynthetic process;suberin biosynthetic process;protein ubiquitination;positive regulation of hydroxymethylglutaryl-CoA reductase (NADPH) activity	integral component of membrane	ubiquitin-protein transferase activity;zinc ion binding
Menispermum	Genefamily15615	2.5146	0.0094	0.0037	probable glycosyltransferase At3g07620		integral component of membrane
Menispermum	Genefamily17499	2.5409	1.5211	0.5986	glutamate--glyoxylate aminotransferase 2	drug transmembrane transport;biosynthetic process	integral component of membrane	transaminase activity;drug transmembrane transporter activity;antiporter activity;pyridoxal phosphate binding
Menispermum	Genefamily17689	2.0927	1.9107	0.913	ferric reduction oxidase 8, mitochondrial isoform X1	oxidation-reduction process	integral component of membrane	oxidoreductase activity
Menispermum	Genefamily21062	2.751	0.0313	0.0114	probable leucine-rich repeat receptor kinase At1g68400	protein phosphorylation	integral component of membrane	protein serine/threonine kinase activity;ATP binding
Menispermum	Genefamily22432	2.4842	0.109	0.0439	stress-induced hydrophobic peptide		integral component of membrane
Menispermum	Genefamily23737	3.4541	0.0156	0.0045	P-loop containing nucleoside triphosphate hydrolases superfamily	metabolic process	integral component of membrane	hydrolase activity
Menispermum	Genefamily23816	4.3894	0.0462	0.0105	NRT1 PTR FAMILY -like isoform X2	transport	integral component of membrane	transporter activity
Menispermum	Genefamily24801	2.3369	0.007	0.003	aminoacrylate hydrolase	metabolic process	integral component of membrane	hydrolase activity
Menispermum	Genefamily21882	3.3077	1.3036	0.3941	sulfate transporter -like	sulfate transmembrane transport	integral component of plasma membrane	secondary active sulfate transmembrane transporter activity
Menispermum	Genefamily13117	3.4822	1.9992	0.5741	cytochrome oxidase subunit 2	electron transport chain;hydrogen ion transmembrane transport	mitochondrial inner membrane;integral component of membrane;respiratory chain	cytochrome-c oxidase activity;copper ion binding
Menispermum	Genefamily20512	2.144	0.1253	0.0584	40S ribosomal S22	translation	ribosome;integral component of membrane	structural constituent of ribosome
Nelumbo	Genefamily11159	2.4602	0.0157	0.0064	Purple acid phosphatase 17	cellular response to phosphate starvation;dephosphorylation;galactolipid biosynthetic process;negative regulation of transcription, DNA-templated	cell surface;integral component of membrane	acid phosphatase activity
Nelumbo	Genefamily11528	3.1598	2.6842	0.8495	glyceraldehyde-3-phosphate dehydrogenase, testis-specific	cell redox homeostasis;oxidation-reduction process	cell;integral component of membrane	electron carrier activity;protein disulfide oxidoreductase activity
Nelumbo	Genefamily7250	2.4895	0.0275	0.011	PREDICTED: uncharacterized protein LOC104588009	mRNA modification	chloroplast thylakoid membrane;integral component of membrane
Nelumbo	Genefamily12225	2.3237	0.0212	0.0091	GPI ethanolamine phosphate transferase 1 isoform X2	GPI anchor biosynthetic process	endoplasmic reticulum membrane;integral component of membrane	sulfuric ester hydrolase activity;transferase activity
Nelumbo	Genefamily11520	2.2057	0.98	0.4443	synaptotagmin-3-like isoform X2	sterol biosynthetic process;pentacyclic triterpenoid biosynthetic process	endoplasmic reticulum;integral component of membrane	lipid binding
Nelumbo	Genefamily5981	3.0836	0.0109	0.0035	cytochrome b561 and DOMON domain-containing At5g47530-like	oxidation-reduction process	integral component of membrane
Nelumbo	Genefamily6867	2.1344	0.0086	0.004	RNA-binding (RRM RBD RNP motifs) family isoform 2		integral component of membrane	nucleotide binding;nucleic acid binding
Nelumbo	Genefamily6911	2.8997	0.0142	0.0049	GABA transporter 1-like	amino acid transmembrane transport;gamma-aminobutyric acid transport	integral component of membrane	gamma-aminobutyric acid transmembrane transporter activity
Nelumbo	Genefamily8564	2.3271	1.0661	0.4581	transmembrane 45A		integral component of membrane
Nelumbo	Genefamily8664	5.7045	2.1037	0.3688	hypothetical protein VITISV_041073	DNA integration	integral component of membrane	nucleic acid binding;zinc ion binding
Nelumbo	Genefamily9130	3.0303	1.5234	0.5027	Os02g0158701, partial		integral component of membrane
Nelumbo	Genefamily10807	2.141	0.0928	0.0433	pentatricopeptide repeat-containing At4g17915		integral component of membrane
Nelumbo	Genefamily10963	2.037	0.0285	0.014	PREDICTED: uncharacterized protein LOC104608717		integral component of membrane
Nelumbo	Genefamily11409	2.9763	3.0296	1.0179	transmembrane 18		integral component of membrane
Nelumbo	Genefamily12615	2.9939	0.0138	0.0046	MATE efflux family 6	drug transmembrane transport	integral component of membrane	drug transmembrane transporter activity;antiporter activity
Nelumbo	Genefamily12945	2.4294	0.0144	0.0059	YLS9-like		integral component of membrane
Nelumbo	Genefamily14581	3.7345	0.0147	0.0039	PREDICTED: uncharacterized protein LOC104598335		integral component of membrane
Nelumbo	Genefamily14626	2.3797	0.0457	0.0192	probable glycerol-3-phosphate acyltransferase 8	metabolic process	integral component of membrane	transferase activity, transferring acyl groups
Nelumbo	Genefamily15172	2.1057	0.0089	0.0042	transmembrane 56-B-like isoform X2		integral component of membrane
Nelumbo	Genefamily15619	2.0485	0.0145	0.0071	PGR5 1B, chloroplastic isoform X1		integral component of membrane
Nelumbo	Genefamily16400	2.5738	0.0067	0.0026	PREDICTED: uncharacterized protein LOC104612935	protein glycosylation;transport	integral component of membrane
Nelumbo	Genefamily13099	2.6033	0.0262	0.0101	GPI-anchored LORELEI-like		integral component of membrane;anchored component of membrane;pollen tube
Nelumbo	Genefamily13489	3.0404	0.0148	0.0049	Transmembrane G1P-related 1	protein targeting to mitochondrion;cytochrome c-heme linkage;methylglyoxal catabolic process to D-lactate via S-lactoyl-glutathione	mitochondrial inner membrane;plasma membrane;integral component of membrane	heme binding
Nelumbo	Genefamily16906	2.3122	0.0056	0.0024	carboxyl-terminal-processing peptidase 2, chloroplastic isoform X1	proteolysis;phosphatidylglycerol biosynthetic process	mitochondrion;integral component of membrane;thylakoid lumen	serine-type peptidase activity
Nelumbo	Genefamily12818	3.3145	0.0185	0.0056	50S ribosomal L12, chloroplastic-like	translation	ribosome;integral component of membrane	structural constituent of ribosome
Nelumbo	Genefamily8656	2.4674	1.4616	0.5923	molybdate transporter 1-like	molybdate ion transport	vacuole;integral component of membrane	molybdate ion transmembrane transporter activity
Penthorum	Genefamily6804	2.3857	0.0183	0.0077	Tryptophan tyrosine permease isoform 1	amino acid transmembrane transport;purine nucleobase transport	chloroplast inner membrane;integral component of membrane
Penthorum	Genefamily16372	2.111	0.0088	0.0042	potassium transporter 12	potassium ion transmembrane transport	chloroplast;integral component of membrane	potassium ion transmembrane transporter activity
Penthorum	Genefamily7172	2.2237	0.0213	0.0096	S-isoprenylcysteine O-methyltransferase B-like isoform X1	C-terminal protein methylation	endoplasmic reticulum membrane;integral component of membrane	protein C-terminal S-isoprenylcysteine carboxyl O-methyltransferase activity
Penthorum	Genefamily6696	2.0439	0.0166	0.0081	dol-P-Man:Man(7) c(2)-PP-Dol alpha-1,6-mannosyltransferase isoform X1	regulation of transcription, DNA-templated;metabolic process	integral component of membrane	transcription factor activity, sequence-specific DNA binding;transferase activity, transferring glycosyl groups;sequence-specific DNA binding
Penthorum	Genefamily7826	4.3671	0.082	0.0188	endoribonuclease Dicer homolog 3b-like	protein phosphorylation;DNA integration	integral component of membrane	nucleic acid binding;protein kinase activity;ATP binding;zinc ion binding
Penthorum	Genefamily11960	2.143	0.0116	0.0054	Secretory carrier-associated membrane 4	protein phosphorylation;protein transport	integral component of membrane	protein serine/threonine/tyrosine kinase activity
Penthorum	Genefamily12095	2.2787	0.6977	0.3062	probable LRR receptor-like serine threonine- kinase At4g26540	protein phosphorylation;oxidation-reduction process	integral component of membrane	protein serine/threonine kinase activity;ATP binding;2-alkenal reductase [NAD(P)] activity
Penthorum	Genefamily13255	2.1591	0.0092	0.0043	PREDICTED: uncharacterized protein At3g49720		integral component of membrane
Penthorum	Genefamily14706	2.8098	0.0075	0.0027	RING U-box superfamily , isoform 2	metabolic process	integral component of membrane	zinc ion binding;ligase activity
Penthorum	Genefamily16744	2.0669	0.0074	0.0036	PREDICTED: uncharacterized protein LOC100242361	calcium ion transport;Golgi organization;response to salt stress;response to sucrose;response to glucose;response to fructose	integral component of membrane
Penthorum	Genefamily7208	2.6366	0.0124	0.0047	Myosin-J heavy chain	signal transduction;metabolic process	integral component of membrane;myosin complex	motor activity;actin binding;signal transducer activity;ATP binding
Penthorum	Genefamily5930	2.3934	0.0131	0.0055	PREDICTED: uncharacterized protein LOC105116899	fatty acid beta-oxidation;protein import into peroxisome matrix	intracellular;integral component of membrane
Penthorum	Genefamily9865	7.1391	0.0209	0.0029	NADH dehydrogenase [ubiquinone] 1 beta subcomplex subunit 3-B	electron transport chain	mitochondrial respiratory chain complex I;integral component of membrane
Penthorum	Genefamily8902	2.0873	0.018	0.0086	plasma membrane associated -like		mitochondrion;integral component of membrane
Penthorum	Genefamily9491	2.1748	0.0211	0.0097	kDa heat shock , peroxisomal-like	protein folding;response to high light intensity;response to hydrogen peroxide	peroxisomal matrix;integral component of membrane
Phryma	Genefamily16364	2.4156	0.0136	0.0056	photosynthetic NDH subunit of subcomplex B 5, chloroplastic	response to oxidative stress;thylakoid membrane organization;isopentenyl diphosphate biosynthetic process, methylerythritol 4-phosphate pathway;cellular cation homeostasis;divalent metal ion transport	chloroplast thylakoid membrane;integral component of membrane
Phryma	Genefamily14516	2.73	1.4499	0.5311	PRA1 family F3-like		endomembrane system;integral component of membrane;intracellular membrane-bounded organelle;cytoplasmic part
Phryma	Genefamily11365	2.5539	0.6585	0.2578	potassium channel KAT3	high-affinity potassium ion import;response to nitrate;nitrate transport;regulation of membrane potential	endoplasmic reticulum;plasma membrane;integral component of membrane	voltage-gated potassium channel activity
Phryma	Genefamily9177	3.3295	1.9094	0.5735	CTL DDB_G0288717		integral component of membrane
Phryma	Genefamily11518	7.7069	0.2007	0.026	transmembrane 9 superfamily member 4-like		integral component of membrane
Phryma	Genefamily11657	3.6953	0.2653	0.0718	MGDG specific palmitate delta-7 desaturase	fatty acid biosynthetic process;oxidation-reduction process	integral component of membrane	stearoyl-CoA 9-desaturase activity
Phryma	Genefamily12378	2.821	0.5125	0.1817	TOM THREE HOMOLOG 1 isoform X2		integral component of membrane
Phryma	Genefamily12427	3.7188	0.211	0.0567	Six-hairpin glycosidase	carbohydrate metabolic process	integral component of membrane	hydrolase activity, hydrolyzing O-glycosyl compounds
Phryma	Genefamily12584	2.0685	0.0278	0.0135	bidirectional sugar transporter SWEET16-like	carbohydrate transmembrane transport	integral component of membrane	sugar transmembrane transporter activity
Phryma	Genefamily14191	2.1813	0.0144	0.0066	RING-H2 finger ATL47		integral component of membrane	zinc ion binding
Phryma	Genefamily15893	2.2931	0.0125	0.0054	presenilins-associated rhomboid , mitochondrial	protein processing	mitochondrion;integral component of membrane	serine-type endopeptidase activity
Phryma	Genefamily10667	2.4273	0.0108	0.0045	psbP domain-containing 7, chloroplastic	photosynthesis	photosystem II oxygen evolving complex;integral component of membrane;extrinsic component of membrane	calcium ion binding
Phryma	Genefamily15771	2.5107	0.0151	0.006	signal peptidase complex subunit 3B-like	signal peptide processing	signal peptidase complex;integral component of membrane	peptidase activity
Sassafras	Genefamily12842	3.4302	0.308	0.0898	1,3-beta-glucan synthase component FKS1	(1->3)-beta-D-glucan biosynthetic process	1,3-beta-D-glucan synthase complex;integral component of membrane	1,3-beta-D-glucan synthase activity
Sassafras	Genefamily7159	2.9747	1.7664	0.5938	Keratin-associated 5-4		chloroplast envelope;integral component of membrane
Sassafras	Genefamily12087	6.7237	2.3062	0.343	plasma membrane proteolipid Pmp3		cytoplasm;integral component of membrane
Sassafras	Genefamily13408	4.5714	0.0494	0.0108	3-hydroxy-3-methylglutaryl-coenzyme A reductase 1-like	isoprenoid biosynthetic process;coenzyme A metabolic process;oxidation-reduction process	endoplasmic reticulum membrane;integral component of membrane	hydroxymethylglutaryl-CoA reductase (NADPH) activity;NADP binding
Sassafras	Genefamily6359	2.3839	1.3176	0.5527	ycf20 isoform X1		integral component of membrane
Sassafras	Genefamily7026	4.0263	0.0186	0.0046	glycosyltransferase 5	metabolic process	integral component of membrane	transferase activity, transferring glycosyl groups
Sassafras	Genefamily8284	3.2077	0.027	0.0084	mitochondrial metalloendopeptidase OMA1-like	proteolysis	integral component of membrane	metalloendopeptidase activity
Sassafras	Genefamily9385	2.1275	0.008	0.0038	TRIGALACTOSYLDIACYLGLYCEROL 2, chloroplastic		integral component of membrane
Sassafras	Genefamily12380	2.1293	0.0437	0.0205	NRT1 PTR FAMILY -like	oligopeptide transport;response to acidic pH;nitrate transport	integral component of membrane	nitrate efflux transmembrane transporter activity
Sassafras	Genefamily12384	7.0859	0.0478	0.0067	probable leucine-rich repeat receptor-like serine threonine- kinase At3g14840	protein phosphorylation	integral component of membrane	protein kinase activity;ATP binding
Sassafras	Genefamily13059	2.1768	0.0962	0.0442	uncharacterized mitochondrial g00810-like	protein phosphorylation;DNA integration	integral component of membrane	nucleic acid binding;protein kinase activity;ATP binding;zinc ion binding
Sassafras	Genefamily13095	2.3125	0.0362	0.0156	PREDICTED: uncharacterized protein LOC104591752		integral component of membrane
Sassafras	Genefamily13245	3.8442	0.037	0.0096	probable inactive receptor kinase At5g67200	cytokinesis by cell plate formation;protein phosphorylation	integral component of membrane	protein kinase activity;ATP binding
Sassafras	Genefamily13489	2.5602	0.0358	0.014	pleiotropic drug resistance 1-like isoform X3	transport;metabolic process	integral component of membrane	ATP binding;ATPase activity
Sassafras	Genefamily14022	2.6318	1.4776	0.5614	xylosyltransferase 2	metabolic process	integral component of membrane	acetylglucosaminyltransferase activity;protein xylosyltransferase activity
Sassafras	Genefamily17328	2.3815	0.0087	0.0036	S-acyltransferase 11-like	metabolic process	integral component of membrane	zinc ion binding;protein-cysteine S-palmitoyltransferase activity
Sassafras	Genefamily11258	4.7797	0.0393	0.0082	uncharacterized protein		mitochondrion;integral component of membrane
Sassafras	Genefamily14441	2.0657	0.0231	0.0112	potassium channel KAT2	circadian rhythm;response to high light intensity;stomatal movement;potassium ion transmembrane transport	nucleus;plasma membrane;integral component of membrane	inward rectifier potassium channel activity;protein binding;cyclic nucleotide binding
Sassafras	Genefamily7161	2.5219	2.5442	1.0089	WAT1-related At5g07050-like	transmembrane transport	plasma membrane;integral component of membrane	transmembrane transporter activity
Sassafras	Genefamily9637	2.8961	0.0248	0.0086	cytochrome c-type biogenesis	protein-heme linkage;cytochrome complex assembly	plasma membrane;integral component of membrane
Sassafras	Genefamily7691	7.4206	2.6662	0.3593	probable signal peptidase complex subunit 1	signal peptide processing;protein targeting to ER	signal peptidase complex;integral component of endoplasmic reticulum membrane	peptidase activity
Saururus	Genefamily12432	2.6262	0.0165	0.0063	TIC 20-v, chloroplastic		chloroplast thylakoid membrane;integral component of membrane
Saururus	Genefamily8657	12.6938	1.6643	0.1311	Cytochrome P450	oxidation-reduction process	integral component of membrane	monooxygenase activity;iron ion binding;oxidoreductase activity, acting on paired donors, with incorporation or reduction of molecular oxygen;heme binding
Saururus	Genefamily9529	2.2615	2.5955	1.1477	transmembrane		integral component of membrane
Saururus	Genefamily9768	2.838	0.0225	0.0079	hypothetical protein L484_024242		integral component of membrane
Saururus	Genefamily9876	8.3227	0.0445	0.0053	oligopeptide transporter 4	transmembrane transport	integral component of membrane
Saururus	Genefamily10604	2.8375	0.0354	0.0125	RING-H2 finger ATL70-like		integral component of membrane	zinc ion binding
Saururus	Genefamily10992	2.1877	0.0413	0.0189	vesicle transport SFT2B	phosphatidylinositol biosynthetic process;vesicle-mediated transport	integral component of membrane
Saururus	Genefamily11460	2.5029	0.0201	0.008	S-adenosyl-L-methionine-dependent methyltransferases superfamily	methylation	integral component of membrane	S-adenosylmethionine-dependent methyltransferase activity
Saururus	Genefamily11705	4.9224	0.0512	0.0104	PREDICTED: uncharacterized protein LOC100779351 isoform X5		integral component of membrane
Saururus	Genefamily11833	7.5315	0.0701	0.0093	PREDICTED: uncharacterized protein LOC104592855		integral component of membrane
Saururus	Genefamily13124	3.5266	0.0361	0.0102	elongation of fatty acids 3-like		integral component of membrane
Saururus	Genefamily6678	2.272	0.0246	0.0108	mitochondrial uncoupling 5	mitochondrial transport	integral component of membrane;mitochondrial membrane
Saururus	Genefamily11961	4.4341	0.0276	0.0062	mitochondrial import inner membrane translocase subunit TIM23-2-like	protein import into mitochondrial matrix	mitochondrial inner membrane presequence translocase complex;integral component of mitochondrial inner membrane	protein channel activity
Saururus	Genefamily7177	2.7829	0.0361	0.013	NADH dehydrogenase subunit 4 (mitochondrion)	ATP synthesis coupled electron transport	mitochondrion;integral component of membrane	NADH dehydrogenase (ubiquinone) activity
Saururus	Genefamily10507	3.733	0.0341	0.0091	PREDICTED: uncharacterized protein LOC104593897		mitochondrion;integral component of membrane
Saururus	Genefamily6032	3.0984	0.0308	0.0099	NADH dehydrogenase subunit 1 (mitochondrion)	oxidation-reduction process	mitochondrion;plasma membrane;integral component of membrane	NADH dehydrogenase (ubiquinone) activity
