# Supplementary material for: Natural selection and repeated patterns of molecular evolution following allopatric divergence
Source: eLife. 2019 Aug 2;8:e45199. doi: 10.7554/eLife.45199 (PMC6744222; doi:10.7554/eLife.45199)
Supplement: Supplementary file 11. [file elife-45199-supp11.xlsx]

## Sheet: Sheet1
Source of materials for taxon-pair included in the study. Asterisks indicate electronic (photo) vouchers available from the Xiang. All other vouchers are specimens pressed and deposited at NCSC, FMNH, or ZJU, respectively.
Family	Genus	Species	Distribution	Voucher	Origin	Source	Bioproject in NCBI	Biosample in NCBI
Acoraceae	Acorus	A.gramineus	EA	Xianglab311, NCSC	JC Arboretum, C04, 021041	Logan Trading Company, Raleigh, NC, USA	PRJNA508825	SAMN10534244
		A. calamus 2	EA & America	Mobot #2010-0017, FMNH	Missouri Botanical Garden	don't know what variety it is.	PRJNA508825	SAMN10534245
Calycanthaceae	Calycanthus	Calycanthus chinensis	EA	Xianglab312, NCSC	JC Arboretum, A08, xx0487	UBC, Canada. from Zhejiang Prov., China	PRJNA508825	SAMN10534246
		Calycanthus occidentalis	WNA	Xianglab313, NCSC	JC Arboretum, E31, 940431		PRJNA508825	SAMN10534247
Bignoniaceae	Campsis	Campsis grandiflora	EA	Xianglab325*	Plant Delights Nursery	JC Raulston Arboretum	PRJNA508825	SAMN10534248
		Campsis radicans	ENA	Doug&Chen3029, FMNH	UF Florida, USA	Gainesville, Florida, USA	PRJNA508825	SAMN10534249
Ruscaceae	Convallaria	C. majalis var. keiskei	EA	Mobot CSC3039, FMNH	Missouri Botanical Garden		PRJNA508825	SAMN10534250
		C. majalis var. montana	ENA	Xianglab326*	Blomquist garden of Sarah Duke Garden	USA	PRJNA508825	SAMN10534251
Cornaceae	Cornus1	Cornus controversa	EA	Xianglab152, NCSC	Asian garden of Sarah Duke Garden	China	PRJNA508825	SAMN10534252
		Cornus alternifolia	ENA	Xianglab327*	Plant Delights Nursery	Wake Co., NC, USA	PRJNA508825	SAMN10534253
	Cornus2	Cornus elliptica	EA	Xianglab105, NCSC	JC Arboretum, A08, xx0548	China Index Seminum	PRJNA508825	SAMN10534254
		Cornus florida subsp. Urbiniana	ENA	Xianglab128, NCSC	JC Arboretum, T09, 910539		PRJNA508825	SAMN10534255
Anacardiaceae:	Cotinus	Cotinus coggygria	EA	Xianglab324, NCSC	JC Arboretum, F05, 080112	Broken Arrow Nursery, CT	PRJNA508825	SAMN10534256
		Cotinus obovatus	ENA	Xianglab148, NCSC	Blomquist garden of Sarah Duke Garden	USA	PRJNA508825	SAMN10534257
Stemonaceae	Croomia	Croomia japonica	EA	F050901, ZJU	Tianmushan, China		PRJNA508825	SAMN10534258
		Croomia paueiflora	ENA	Xianglab328*	Plant Delights Nursery	Dekalb Co, AL, USA	PRJNA508825	SAMN10534259
Berberidaceae	Dysosma	Dysosma pleiantha	EA	F1512099, ZJU	Tianmushan, China		PRJNA508825	SAMN10534260
		Dysosma versipellis	EA	HZU30483, ZJU	Huangshan, China		PRJNA508825	SAMN10534261
Gelsemiaceae	Gelsemium	Gelsemium elegans	EA	Fu ZJU	Wuyi, China		PRJNA508825	SAMN10534262
		Gelsemium sempervirens	ENA	Doug&Chen3028, FMNH	Florida, USA		PRJNA508825	SAMN10534263
Hamamelidaceae	Hamamelis	Hamamelis japonica	EA	Xianglab316, NCSC	JC Arboretum, E19c, 100384		PRJNA508825	SAMN10534264
		Hamamelis vernalis	ENA	Xianglab317, NCSC	JC Arboretum, E16, xx0241		PRJNA508825	SAMN10534265
Altingiaceae:	Liquidambar	Liquidambar formosana	EA	Xianglab153, NCSC	Asian garden of Sarah Duke Garden	China	PRJNA508825	SAMN10534266
		Liquidambar styraciflua	ENA	Xianglab319, NCSC	JC Arboretum, E10, xx0303		PRJNA508825	SAMN10534267
Magnoliaceae	Liriodendron	Liriodendron chinense	EA	Xianglab320, NCSC	JC Arboretum, E38e, 880440	Camellia Forest, NC	PRJNA508825	SAMN10534268
		Liriodendron tulipifera	ENA	Xianglab321, NCSC	JC Arboretum, D08, 010570		PRJNA508825	SAMN10534269
Menispermaceae	Menispermum	Menispermum dauricum	EA	F0505102, ZJU	Tianmu, China		PRJNA508825	SAMN10534270
		Menispermum canadense	ENA	Doug&Chen3033, FMNH	? Co., Florida, USA		PRJNA508825	SAMN10534271
Lamiaceae	Meehania	Meehania fargesii var radicans	EA	F120202, ZJU	Tianmushan, China		PRJNA508825	SAMN10534272
		Meehania cordata	ENA	Xianglab329*	Plant Delights Nursery	New Moon Nursery	PRJNA508825	SAMN10534273
Nelumbonaceae	Nelumbo	Nelumbo nucifera	EA	Xianglab330*	JC Arboretum, C04		PRJNA508825	SAMN10534274
		Nelumbo lutea	ENA	Doug&Chen3030, FMNH	Lachua Co., Florida, USA		PRJNA508825	SAMN10534275
Penthoraceae(Saxifragaceae)	Penthorum	Penthorum chinense	EA	Fu120203, ZJU	Tianmushan, China		PRJNA508825	SAMN10534276
		Penthorum sedoides	ENA	Xianglab331*	Plant Delights Nursery	Zac Hill 2AL13-003, 2013, Calhoun Co., AL; Plant Delight Garden	PRJNA508825	SAMN10534277
Phrymaceae(Verbenaceae)	Phryma	Phryma leptostachya subsp. asiatica	EA	CF15040, ZJU	Tianmushan, China		PRJNA508825	SAMN10534278
		Phryma leptostachya subsp. leptostachya	ENA	Xianglab332*	Asian garden of Sarah Duke Garden	China	PRJNA508825	SAMN10534279
Lauraceae	Sassafras	Sassafras tzumu	EA	Xianglab322, NCSC	JC Arboretum, Su8, 020919	Forestfarm, Williams, OR	PRJNA508825	SAMN10534280
		Sassafras albidum	ENA	Xianglab323, NCSC	JC Arboretum, E29, xx0889		PRJNA508825	SAMN10534281
Saururaceae	Saururus	Saururus chinensis	EA	Mobot # 1998-0613, FMNH	Missouri Botanical Garden		PRJNA508825	SAMN10534282
		Saururus cernuus	ENA	Xianglab158, NCSC	Plant Delights Nursey	Perquimans Co., NC, USA	PRJNA508825	SAMN10534283
