# Supplementary material for: Natural selection and repeated patterns of molecular evolution following allopatric divergence
Source: eLife. 2019 Aug 2;8:e45199. doi: 10.7554/eLife.45199 (PMC6744222; doi:10.7554/eLife.45199)
Supplement: Supplementary file 12. [file elife-45199-supp12.xlsx]

## Sheet: Sheet1
	Saururus	Sassafras	Phryma	Penthorum	Nelumbo	Menispermum	Meehania	Liriodendron	Liquidarnbar	Hamamelis	Gelsemium	Dysosma	Croomia	Cotinus	Cornus-2	Cornus-1	Convallaria	Campsis	Calycanthus	Acorus
Total count	8155	10108	10803	9997	9139	8039	11259	7561	10786	10374	10557	9527	9148	10007	10198	10618	7617	7730	9716	7259
No. of genes with Ks ≤ 0.01	162	843	646	1022	1717	718	307	1725	279	140	31	2191	123	2737	1763	162	1658	1208	737	40
No. of genes with Ks ≤ 0.005	6	93	53	115	246	105	35	454	20	9	1	445	18	589	319	6	451	268	78	7
No. of genes with Ka/Ks ≥ 2	104	160	119	93	184	112	85	78	126	115	67	111	173	128	116	123	125	72	115	102
No. of genes with Ka/Ks ≥ 2 & Ks ≤ 0.01	37	75	52	50	132	46	26	33	37	30	12	67	45	68	58	23	50	44	74	22
No. of genes with Ka/Ks≥ 2 & Ks ≤ 0.005	4	20	12	21	70	15	9	20	6	3	0	37	2	45	32	1	18	19	26	4
No. of genes with Ka/Ks ≥ 2 & Ks > 0.01	67	85	67	43	52	66	59	45	89	85	55	44	128	60	58	100	75	28	41	80
No. of genes with Ka/Ks ≥ 2 & Ks > 0.005	100	140	107	72	114	97	76	58	120	112	67	74	171	83	84	122	107	53	89	98
